# Supplementary material for: Distributions and Trends of the Global Burden of Colorectal Cancer Attributable to Dietary Risk Factors over the Past 30 Years
Source: MDPI journal article supplement (doi:10.3390/nu16010132), 2023-12-30
Supplement: s1 [file s1]

# Supplementary material

## Distributions and trends of the global burden of colorectal cancer attributable to dietary risk factors over the past 30 years

|                                                                                                                                                                                                              |     |
|--------------------------------------------------------------------------------------------------------------------------------------------------------------------------------------------------------------|-----|
| Supplementary Figure S1. The global burden of CRC attributable to diet low in whole grains over the past 30 years.                                                                                           | 2   |
| Supplementary Figure S2. The global burden of CRC attributable to diet low in milk over the past 30 years. ....                                                                                              | 3   |
| Supplementary Figure S3. The global burden of CRC attributable to diet low in fiber over the past 30 years. ....                                                                                             | 4   |
| Supplementary Figure S4. The global burden of CRC attributable to diet low in calcium over the past 30 years. ....                                                                                           | 5   |
| Supplementary Figure S5. The global burden of CRC attributable to diet high in red meat over the past 30 years. ..                                                                                           | 6   |
| Supplementary Figure S6. The global burden of CRC attributable to diet high in processed meat over the past 30 years. ....                                                                                   | 7   |
| Supplementary Figure S7. Flow chart of data selection in this study. ....                                                                                                                                    | 8   |
| Supplementary Table S1. The definition and theoretical minimum risk exposure level for dietary risk factor in 2019. ....                                                                                     | 9   |
| Supplementary Table S2. The global death cases and age-standardized death rates of CRC in 204 countries and territories, and their temporal trends from 1990 to 2019. ....                                   | 10  |
| Supplementary Table S3. The death cases and age-standardized death rates of CRC attributable to all dietary risks in 1990 and 2019, and their temporal trends from 1990 to 2019. ....                        | 21  |
| Supplementary Table S4. The death cases and age-standardized death rates of CRC attributable to all dietary risk factors in 204 countries and territories, and their temporal trends from 1990 to 2019. .... | 23  |
| Supplementary Table S5. The death cases and age-standardized death rates of CRC attributable to diet low in whole grains in 1990 and 2019, and their temporal trends from 1990 to 2019. ....                 | 105 |
| Supplementary Table S6. The death cases and age-standardized death rates of CRC attributable to diet low in milk in 1990 and 2019, and their temporal trends from 1990 to 2019. ....                         | 107 |
| Supplementary Table S7. The death cases and age-standardized death rates of CRC attributable to diet low in fiber in 1990 and 2019, and their temporal trends from 1990 to 2019. ....                        | 109 |
| Supplementary Table S8. The death cases and age-standardized death rates of CRC attributable to diet low in calcium in 1990 and 2019, and their temporal trends from 1990 to 2019. ....                      | 111 |
| Supplementary Table S9. The death cases and age-standardized death rates of CRC attributable to diet high in red meat in 1990 and 2019, and their temporal trends from 1990 to 2019. ....                    | 113 |
| Supplementary Table S10. The death cases and age-standardized death rates of CRC attributable to diet high in processed meat in 1990 and 2019, and their temporal trends from 1990 to 2019. ....             | 115 |

**Supplementary Figure S1.** The global burden of CRC attributable to diet low in whole grains over the past 30 years.

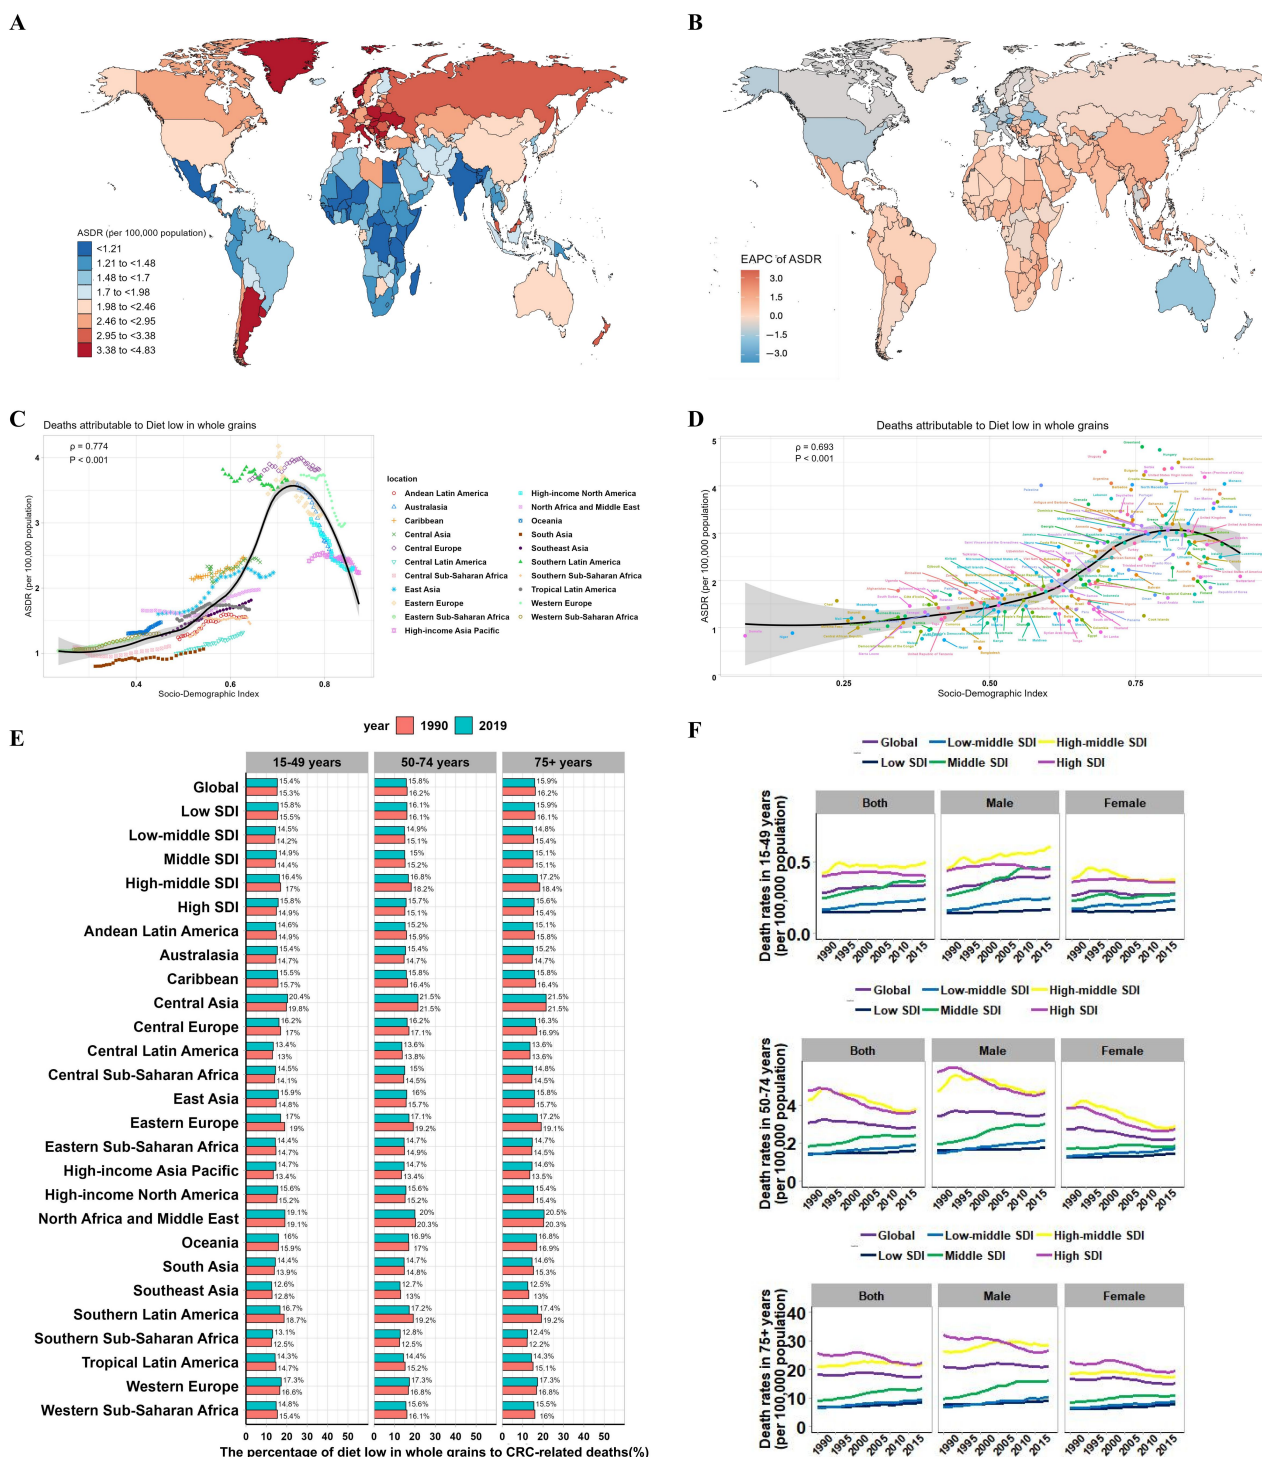

(A) The ASDR in 204 countries and territories in 2019. (B) The EAPC in ASDR in 204 countries and territories from 1990 to 2019. (C) Relationship between SDI and ASDR of CRC attributable to diet low in whole grains by regions in 2019. (D) Relationship between SDI and ASDR of CRC attributable to diet low in whole grains by nations in 2019. (E) The percentage of diet low in whole grains to CRC-related deaths between 1990 and 2019, in territories with low to high SDIs and in 21 GBD regions. (F) Deaths attributable to diet low in whole grains in CRC by different age and sex from 1990 to 2019.

**Supplementary Figure S2.** The global burden of CRC attributable to diet low in milk over the past 30 years.

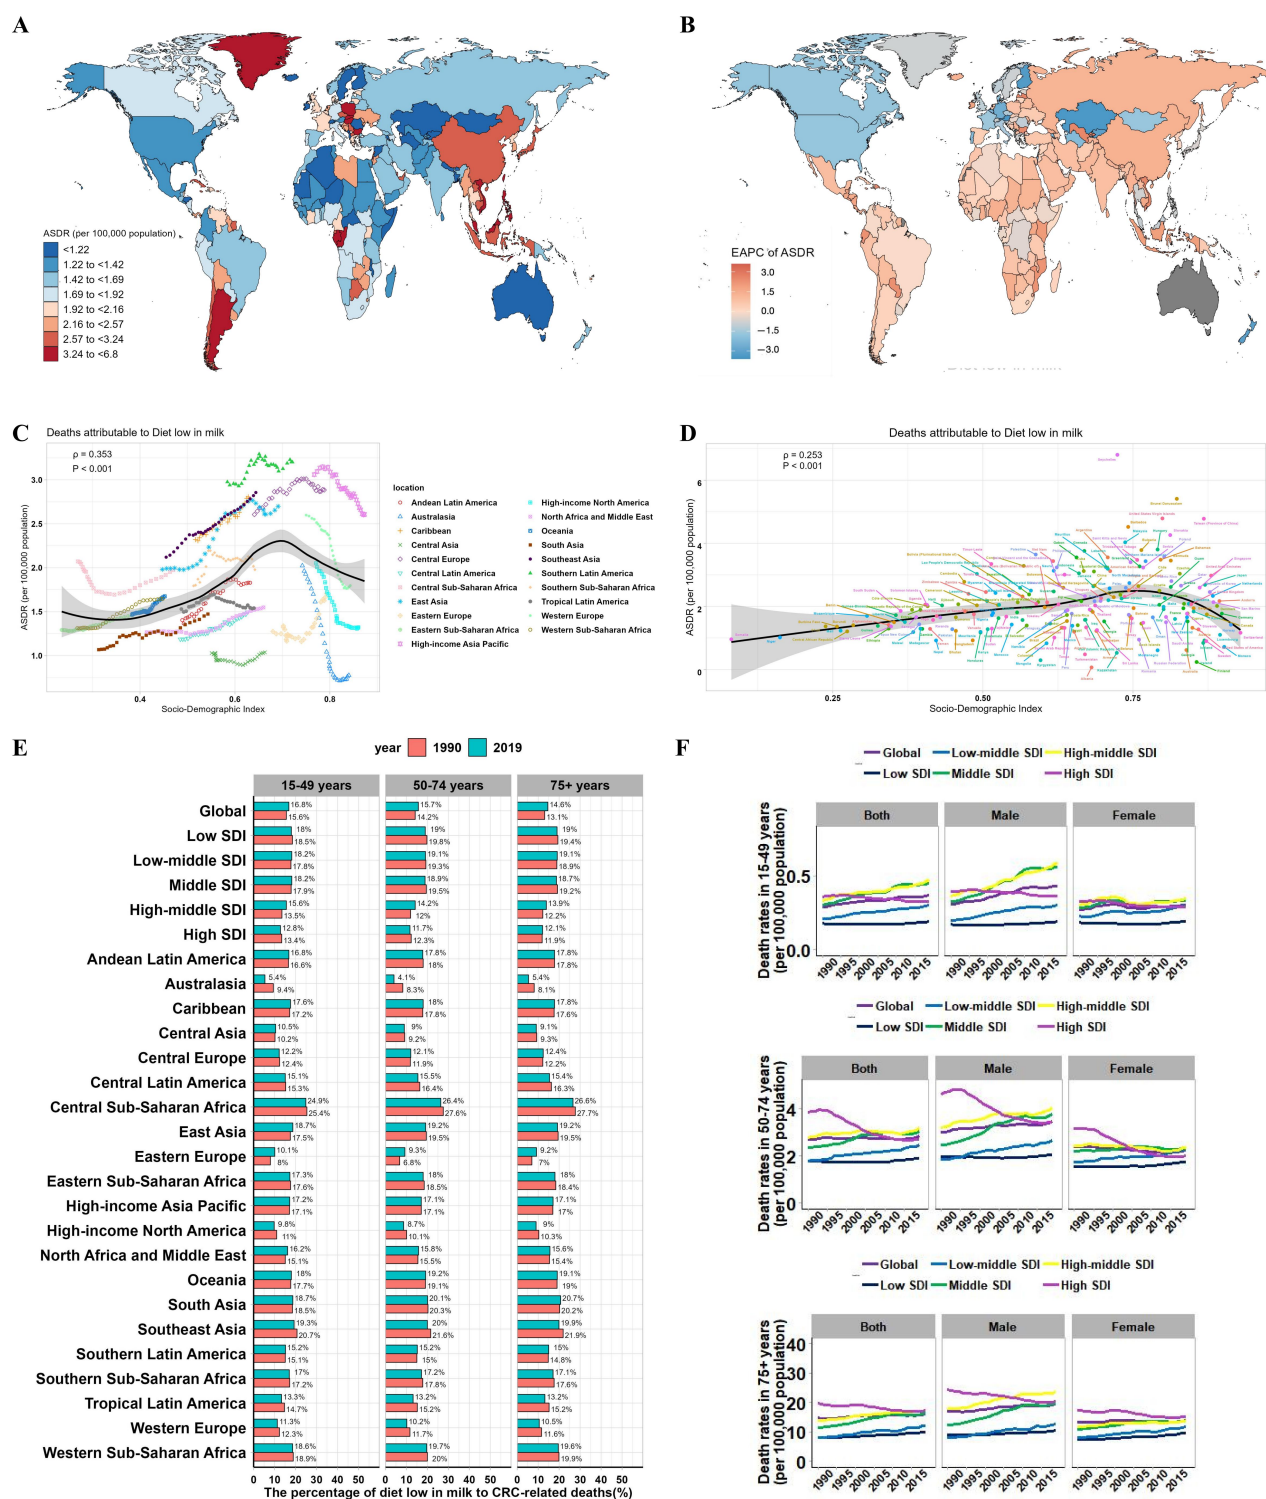

(A) The ASDR in 204 countries and territories in 2019. (B) The EAPC in ASDR in 204 countries and territories from 1990 to 2019. (C) Relationship between SDI and ASDR of CRC attributable to diet low in milk by regions in 2019. (D) Relationship between SDI and ASDR of CRC attributable to diet low in milk by nations in 2019. (E) The percentage of diet low in milk to CRC-related deaths between 1990 and 2019, in territories with low to high SDIs and in 21 GBD regions. (F) Deaths attributable to diet low in milk in CRC by different age and sex from 1990 to 2019.

**Supplementary Figure S3.** The global burden of CRC attributable to diet low in fiber over the past 30 years.

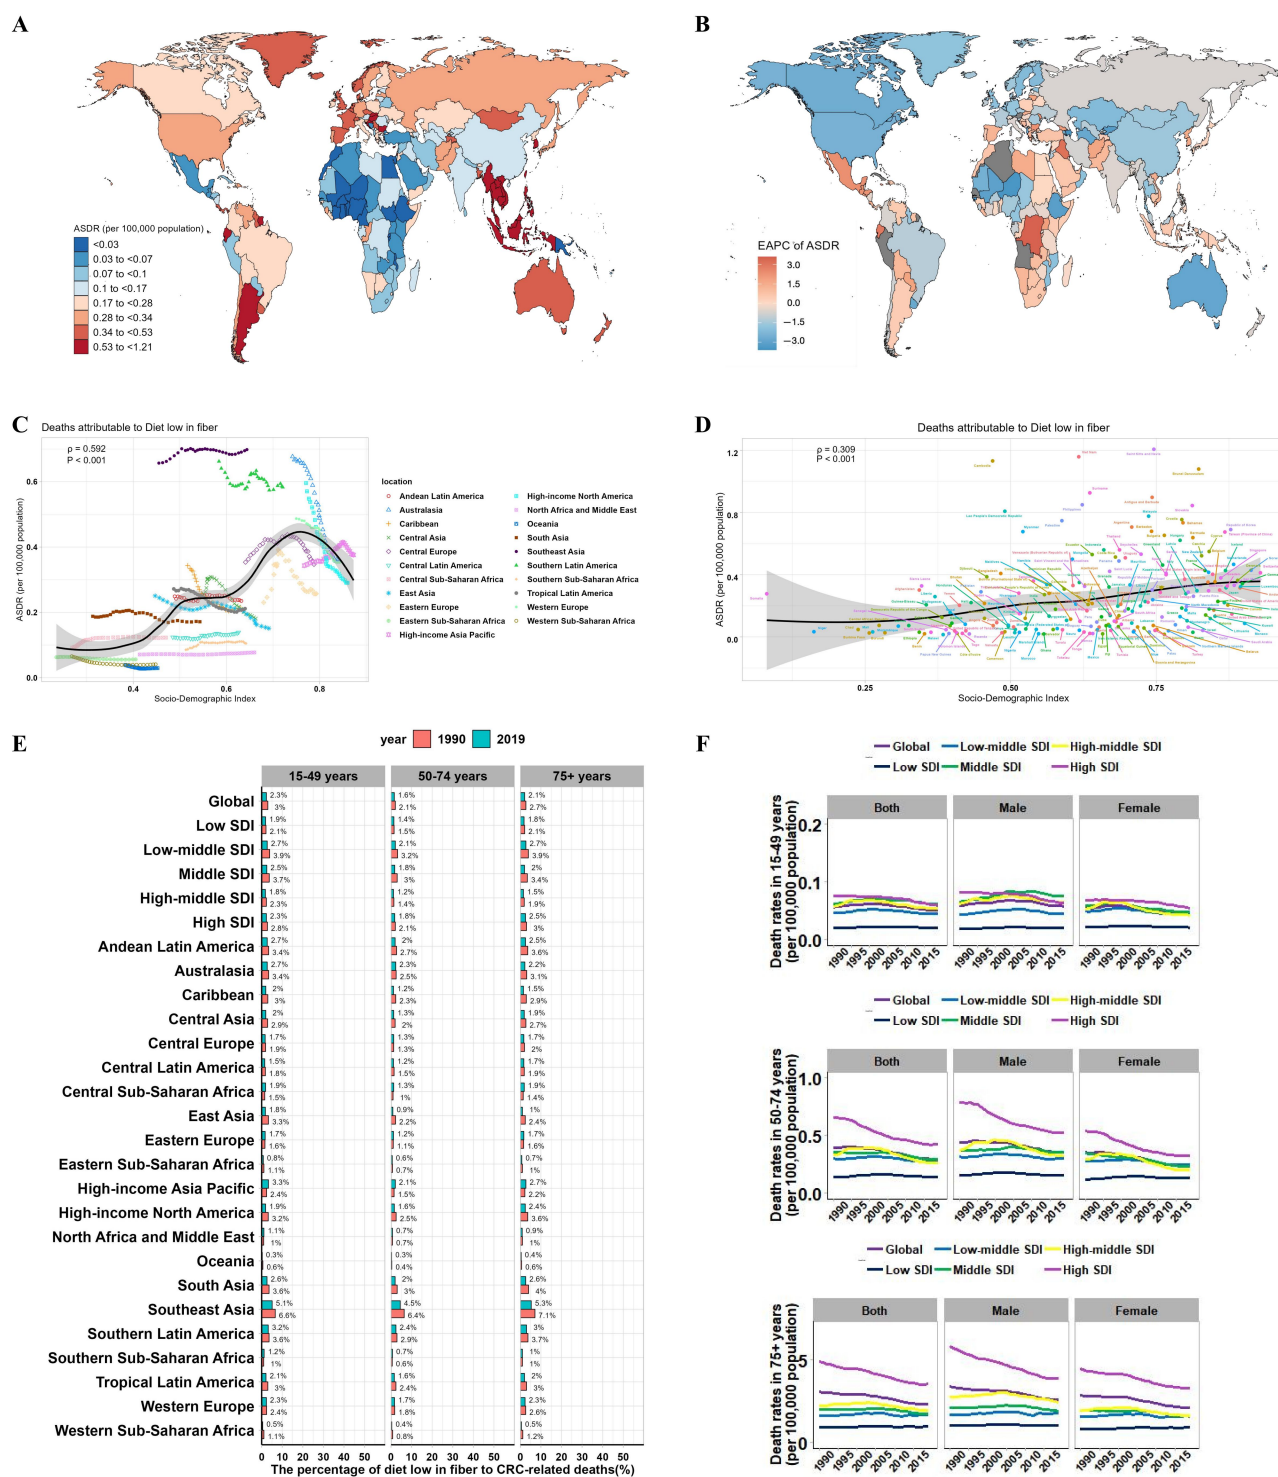

(A) The ASDR in 204 countries and territories in 2019. (B) The EAPC in ASDR in 204 countries and territories from 1990 to 2019. (C) Relationship between SDI and ASDR of CRC attributable to diet low in fiber by regions in 2019. (D) Relationship between SDI and ASDR of CRC attributable to diet low in fiber by nations in 2019. (E) The percentage of diet low in fiber to CRC-related deaths between 1990 and 2019, in territories with low to high SDIs and in 21 GBD regions. (F) Deaths attributable to diet low in fiber in CRC by different age and sex from 1990 to 2019.



**Supplementary Figure S4.** The global burden of CRC attributable to diet low in calcium over the past 30 years.

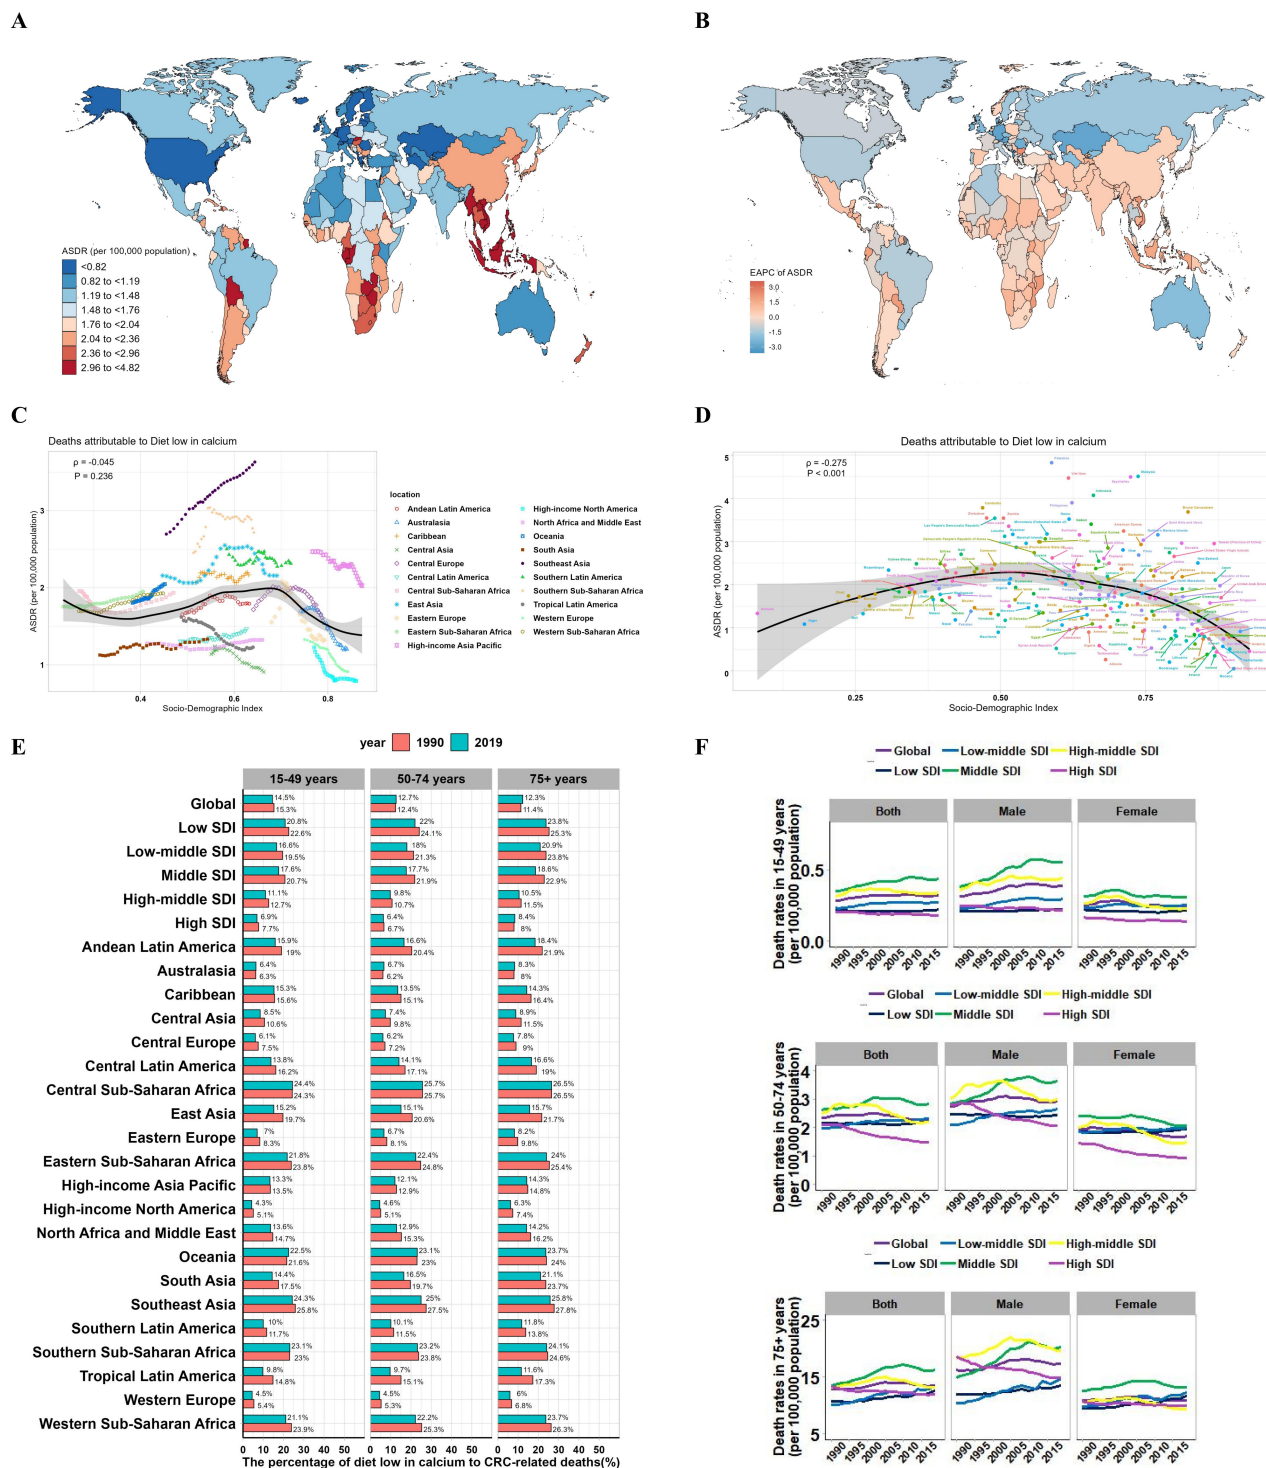

(A) The ASDR in 204 countries and territories in 2019. (B) The EAPC in ASDR in 204 countries and territories from 1990 to 2019. (C) Relationship between SDI and ASDR of CRC attributable to diet low in calcium by regions in 2019. (D) Relationship between SDI and ASDR of CRC attributable to diet low in calcium by nations in 2019. (E) The percentage of diet low in calcium to CRC-related deaths between 1990 and 2019, in territories with low to high SDIs and in 21 GBD regions. (F) Deaths attributable to diet low in calcium in CRC by different age and sex from 1990 to 2019.

**Supplementary Figure S5.** The global burden of CRC attributable to diet high in red meat over the past 30 years.

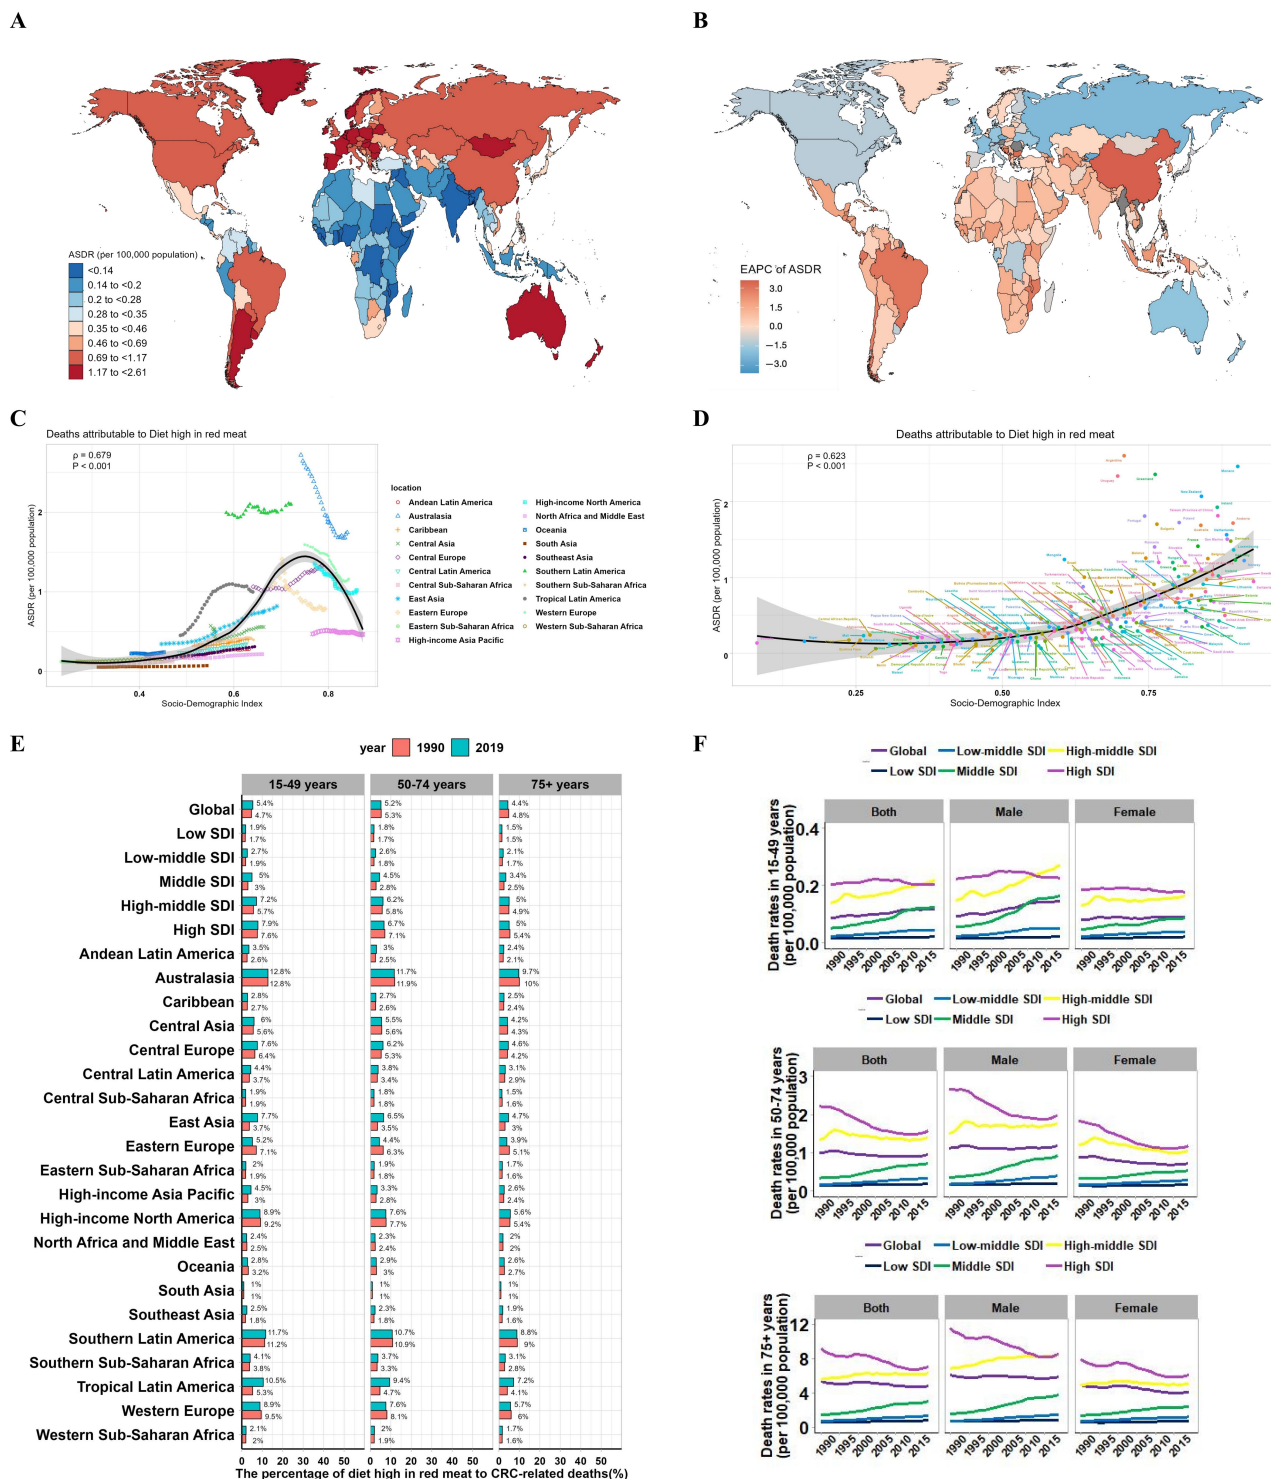

(A) The ASDR in 204 countries and territories in 2019. (B) The EAPC in ASDR in 204 countries and territories from 1990 to 2019. (C) Relationship between SDI and ASDR of CRC attributable to diet high in red meat by regions in 2019. (D) Relationship between SDI and ASDR of CRC attributable to diet high in red meat by nations in 2019. (E) The percentage of diet high in red meat to CRC-related deaths between 1990 and 2019, in territories with low to high SDIs and in 21 GBD regions. (F) Deaths attributable to diet high in red meat in CRC by different age and sex from 1990 to 2019.

**Supplementary Figure S6.** The global burden of CRC attributable to diet high in processed meat over the past 30 years.

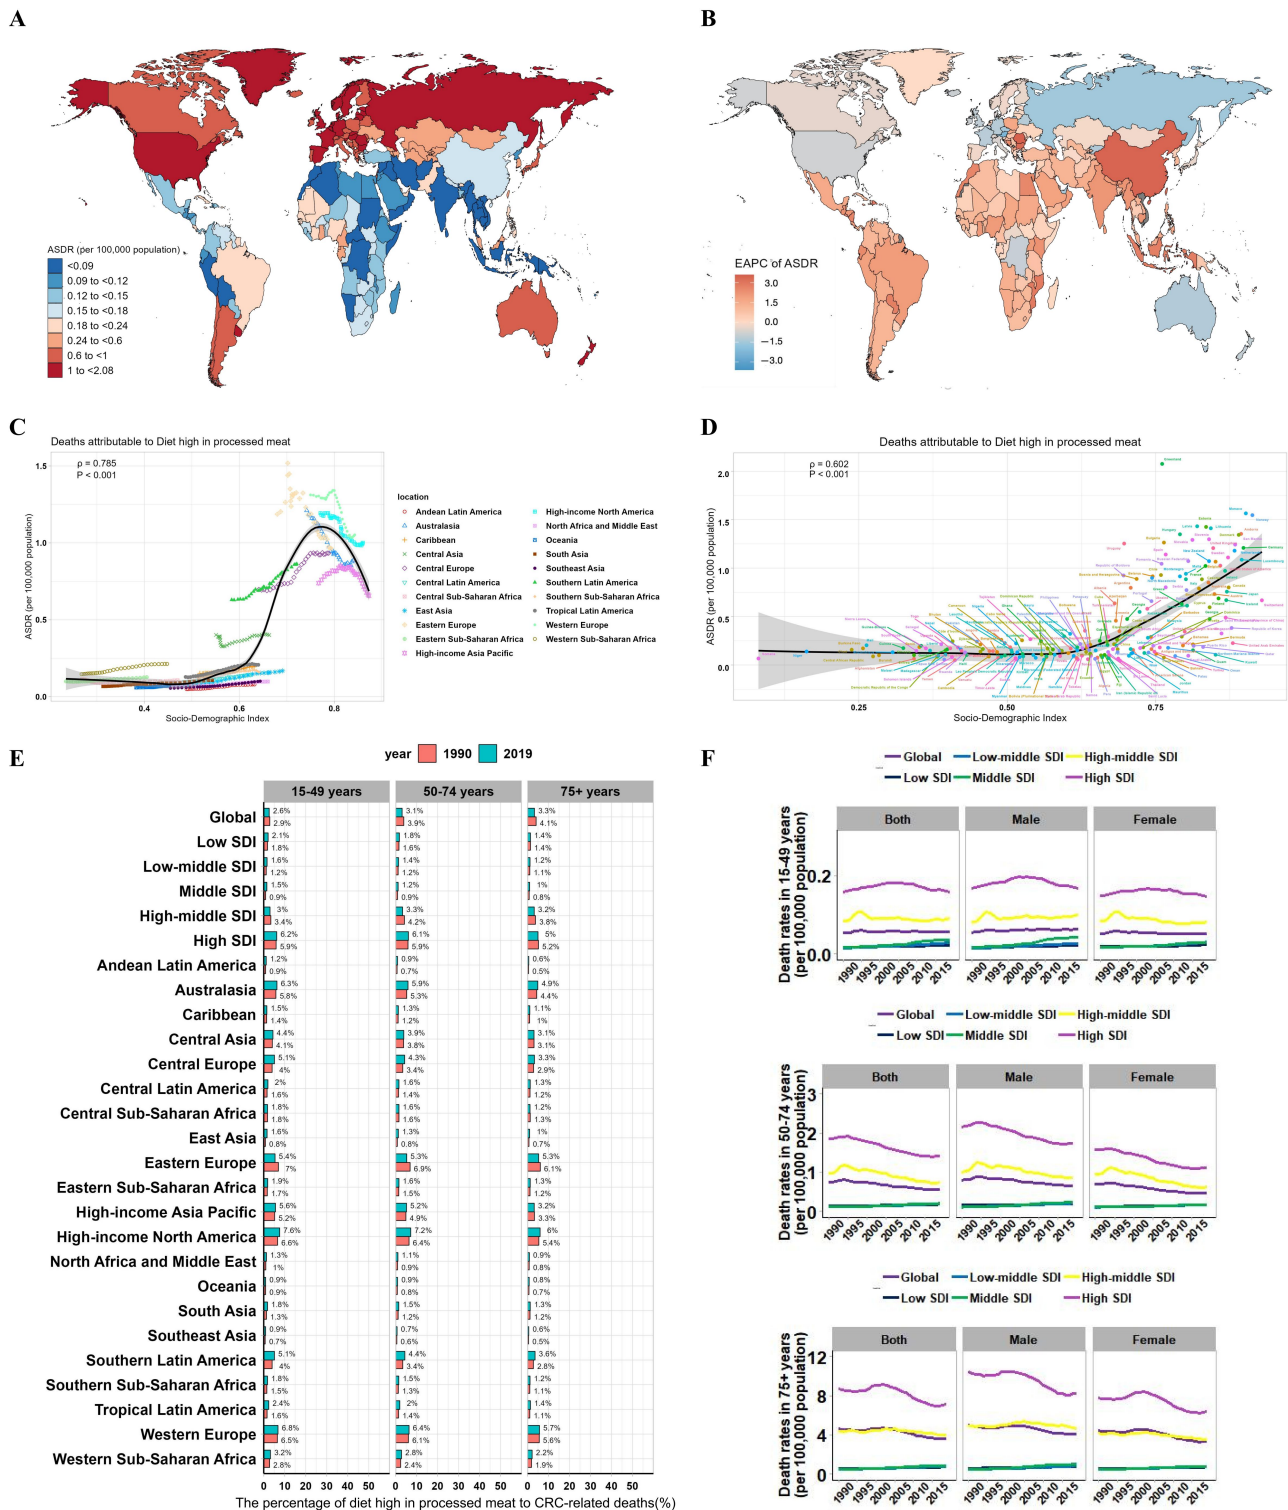

(A) The ASDR in 204 countries and territories in 2019. (B) The EAPC in ASDR in 204 countries and territories from 1990 to 2019. (C) Relationship between SDI and ASDR of CRC attributable to diet low in whole grains by regions in 2019. (D) Relationship between SDI and ASDR of CRC attributable to diet low in whole grains by nations in 2019. (E) The percentage of diet low in whole grains to CRC-related deaths between 1990 and 2019, in

territories with low to high SDIs and in 21 GBD regions. (F) Deaths attributable to diet low in whole grains in CRC by different age and sex from 1990 to 2019.

**Supplementary Figure S7.** Flow chart of data selection in this study.

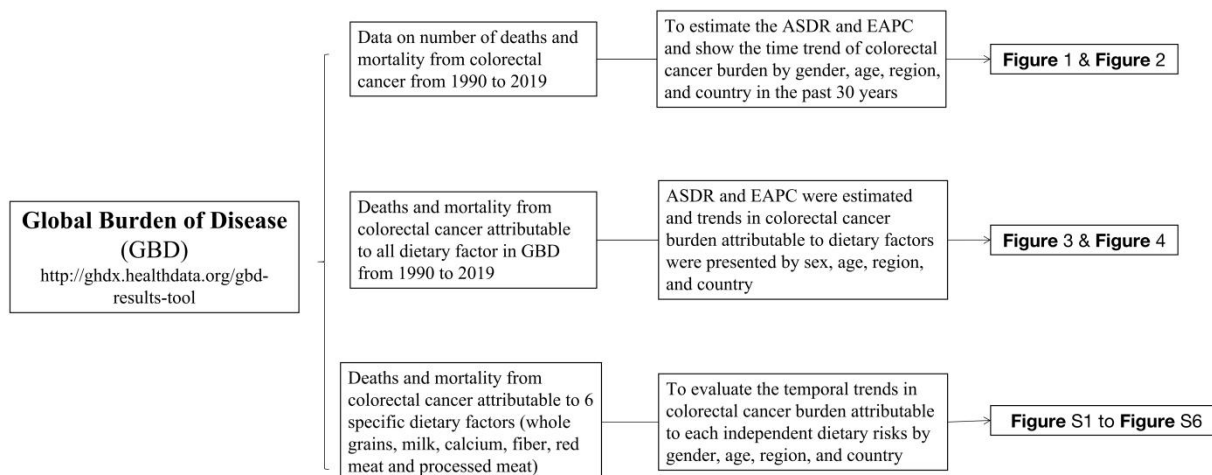



**Supplementary Table S1.** The definition and theoretical minimum risk exposure level for dietary risk factor in 2019.

| <b>Dietary risks</b>        | <b>Definition</b>                                                                                                                                                                                       | <b>Theoretical minimum risk exposure level</b> |
|-----------------------------|---------------------------------------------------------------------------------------------------------------------------------------------------------------------------------------------------------|------------------------------------------------|
| Diet low in whole grains    | Average daily consumption of whole grains (bran, germ, and endosperm in their natural proportion) from breakfast cereals, bread, rice, pasta, biscuits, muffins, tortillas, pancakes, and other sources | Consumption of whole grains 100-150 g per day  |
| Diet low in milk            | Average daily consumption of milk, including non-fat, low-fat, and full-fat milk, excluding soy milk and other plant derivatives                                                                        | Consumption of milk 350-520 g per day          |
| Diet low in fiber           | Average daily intake of fibre from all sources including fruits, vegetables, grains, legumes, and pulses                                                                                                | Consumption of fibre 19-28 g per day           |
| Diet low in calcium         | Average daily intake of calcium from all sources, including milk, yogurt, and cheese                                                                                                                    | Consumption of calcium 1.0-1.5 g per day       |
| Diet high in red meat       | Average daily consumption of red meat (beef, pork, lamb, and goat but excluding poultry, fish, eggs, and all processed meats)                                                                           | Consumption of red meat 18-27 g per day        |
| Diet high in processed meat | Average daily consumption of meat preserved by smoking, curing, salting, or addition of chemical preservatives                                                                                          | Consumption of processed meat 0-4 g per day    |

**Supplementary Table S2.** The global death cases and age-standardized death rates of CRC in 204 countries and territories, and their temporal trends from 1990 to 2019.

| Countries              | 1990                         |                                 | 2019                         |                                 | 1990-2019                 |
|------------------------|------------------------------|---------------------------------|------------------------------|---------------------------------|---------------------------|
|                        | Number of deaths<br>(95% UI) | ASDR per<br>100,000<br>(95% UI) | Number of deaths<br>(95% UI) | ASDR per<br>100,000<br>(95% UI) | EAPC of ASDR<br>(95% CI)  |
| Afghanistan            | 539<br>(324 to 818)          | 7.87<br>(5 to 11.76)            | 1046<br>(686 to 1420)        | 8.43<br>(6.01 to 11.18)         | 0.45<br>(0.24 to 0.66)    |
| Albania                | 170<br>(157 to 182)          | 8.63<br>(7.94 to 9.26)          | 385<br>(291 to 502)          | 9.15<br>(6.96 to 11.89)         | 0.59<br>(0.33 to 0.86)    |
| Algeria                | 744<br>(604 to 901)          | 7.24<br>(6 to 8.56)             | 2384<br>(1889 to 2951)       | 8.05<br>(6.4 to 9.77)           | 0.44<br>(0.4 to 0.49)     |
| American Samoa         | 3<br>(3 to 4)                | 16.3<br>(13.31 to 19.03)        | 7<br>(6 to 9)                | 16.55<br>(14.07 to 19.59)       | 0.14<br>(0.02 to 0.27)    |
| Andorra                | 14<br>(11 to 19)             | 28.75<br>(22.82 to 37.96)       | 34<br>(26 to 42)             | 22.97<br>(17.88 to 28.86)       | -0.82<br>(-0.87 to -0.77) |
| Angola                 | 285<br>(201 to 412)          | 8.01<br>(5.61 to 11.18)         | 952<br>(738 to 1212)         | 9.65<br>(7.82 to 11.99)         | 0.74<br>(0.57 to 0.91)    |
| Antigua and<br>Barbuda | 7<br>(6 to 7)                | 11.99<br>(10.88 to 13.04)       | 15<br>(13 to 17)             | 16.16<br>(14.01 to 18.45)       | 0.94<br>(0.79 to 1.08)    |
| Argentina              | 6593<br>(6296 to 6834)       | 21.15<br>(20.15 to 21.96)       | 12886<br>(12008 to 13759)    | 23.59<br>(22 to 25.13)          | 0.26<br>(0.12 to 0.41)    |
| Armenia                | 372<br>(354 to 391)          | 13.97<br>(13.3 to 14.72)        | 585<br>(492 to 681)          | 14.3<br>(12.07 to 16.63)        | 0.08<br>(-0.04 to 0.2)    |
| Australia              | 4497<br>(4289 to 4642)       | 23.38<br>(22.22 to 24.16)       | 6734<br>(6065 to 7265)       | 15.49<br>(14.08 to 16.66)       | -1.79<br>(-1.95 to -1.63) |
| Austria                | 3276<br>(3117 to 3388)       | 27.16<br>(25.84 to 28.08)       | 2603<br>(2355 to 2811)       | 13.54<br>(12.36 to 14.54)       | -2.81<br>(-2.95 to -2.68) |
| Azerbaijan             | 541<br>(500 to 581)          | 10.55<br>(9.75 to 11.34)        | 1063<br>(875 to 1304)        | 12.2<br>(9.77 to 15.16)         | 1.09<br>(0.6 to 1.58)     |
| Bahamas                | 25<br>(23 to 28)             | 17.23<br>(15.84 to 18.71)       | 68<br>(55 to 82)             | 18.41<br>(15.08 to 22.19)       | 0.49<br>(0.38 to 0.59)    |
| Bahrain                | 19<br>(16 to 22)             | 12.44<br>(10.41 to 14.49)       | 84<br>(64 to 106)            | 11.42<br>(9.08 to 14.03)        | -0.44<br>(-0.73 to -0.16) |
| Bangladesh             | 2047<br>(1502 to 2725)       | 4.62<br>(3.36 to 6.25)          | 6023<br>(4166 to 8611)       | 4.94<br>(3.4 to 7.07)           | 0.14<br>(0 to 0.29)       |
| Barbados               | 52<br>(48 to 56)             | 17.46<br>(16.16 to 18.58)       | 118<br>(99 to 139)           | 23.96<br>(20.09 to 28.31)       | 1.08<br>(0.87 to 1.28)    |
| Belarus                | 2246<br>(2157 to 2335)       | 17.47<br>(16.78 to 18.15)       | 2734<br>(2230 to 3445)       | 17.03<br>(13.86 to 21.48)       | -0.85<br>(-1.14 to -0.56) |
| Belgium                | 3998<br>(3747 to 4183)       | 25.61<br>(23.99 to 26.79)       | 4325<br>(3880 to 4687)       | 17.1<br>(15.59 to 18.44)        | -1.54<br>(-1.65 to -1.43) |
| Belize                 | 6<br>(6 to 7)                | 7.02<br>(6.37 to 7.68)          | 28<br>(24 to 32)             | 10.42<br>(9.02 to 11.99)        | 1.23<br>(0.78 to 1.68)    |

| Countries                              | 1990                         |                                 | 2019                         |                                 | 1990-2019                 |
|----------------------------------------|------------------------------|---------------------------------|------------------------------|---------------------------------|---------------------------|
|                                        | Number of deaths<br>(95% UI) | ASDR per<br>100,000<br>(95% UI) | Number of deaths<br>(95% UI) | ASDR per<br>100,000<br>(95% UI) | EAPC of ASDR<br>(95% CI)  |
| Benin                                  | 122<br>(103 to 143)          | 6.47<br>(5.5 to 7.59)           | 331<br>(261 to 423)          | 7.63<br>(6.19 to 9.53)          | 0.68<br>(0.63 to 0.72)    |
| Bermuda                                | 16<br>(15 to 17)             | 27.25<br>(24.93 to 29.34)       | 26<br>(21 to 31)             | 18.81<br>(15.73 to 22.69)       | -1.26<br>(-1.37 to -1.15) |
| Bhutan                                 | 10<br>(6 to 15)              | 4.61<br>(2.64 to 6.5)           | 36<br>(22 to 49)             | 6.97<br>(4.39 to 9.42)          | 1.44<br>(1.42 to 1.46)    |
| Bolivia<br>(Plurinational<br>State of) | 261<br>(187 to 326)          | 8.85<br>(6.49 to 10.99)         | 992<br>(678 to 1314)         | 12.26<br>(8.43 to 16.2)         | 1.07<br>(1.03 to 1.11)    |
| Bosnia and<br>Herzegovina              | 544<br>(515 to 576)          | 14.4<br>(13.54 to 15.31)        | 1319<br>(1044 to 1639)       | 22.32<br>(17.81 to 27.66)       | 1.88<br>(1.6 to 2.17)     |
| Botswana                               | 54<br>(41 to 70)             | 10.69<br>(8.29 to 13.76)        | 189<br>(133 to 252)          | 15.75<br>(11.59 to 20.48)       | 1.06<br>(0.77 to 1.35)    |
| Brazil                                 | 8340<br>(7992 to 8610)       | 10.21<br>(9.68 to 10.57)        | 27052<br>(25085 to 28403)    | 11.67<br>(10.81 to 12.28)       | 0.55<br>(0.4 to 0.71)     |
| Brunei<br>Darussalam                   | 25<br>(21 to 30)             | 30.25<br>(25.59 to 35.26)       | 72<br>(64 to 82)             | 30.26<br>(26.58 to 34.1)        | 0.67<br>(0.4 to 0.94)     |
| Bulgaria                               | 2366<br>(2247 to 2484)       | 19.4<br>(18.4 to 20.31)         | 3672<br>(2991 to 4477)       | 25.11<br>(20.41 to 30.62)       | 2.15<br>(1.67 to 2.64)    |
| Burkina Faso                           | 228<br>(182 to 286)          | 5.87<br>(4.75 to 7.37)          | 585<br>(461 to 742)          | 7.27<br>(5.82 to 9.12)          | 0.77<br>(0.63 to 0.92)    |
| Burundi                                | 180<br>(143 to 231)          | 8.02<br>(6.44 to 10.12)         | 303<br>(216 to 438)          | 7.17<br>(5.21 to 10.11)         | -0.54<br>(-0.63 to -0.45) |
| Cabo Verde                             | 11<br>(9 to 12)              | 4.49<br>(4.04 to 4.97)          | 47<br>(38 to 56)             | 11.35<br>(8.97 to 13.38)        | 2.64<br>(2.29 to 2.98)    |
| Cambodia                               | 390<br>(303 to 506)          | 9.03<br>(7.24 to 11.72)         | 1561<br>(1240 to 1881)       | 14.02<br>(11.24 to 16.54)       | 1.58<br>(1.53 to 1.64)    |
| Cameroon                               | 364<br>(288 to 445)          | 9.19<br>(7.28 to 11.17)         | 1114<br>(838 to 1460)        | 10.64<br>(8.25 to 13.84)        | 0.58<br>(0.53 to 0.62)    |
| Canada                                 | 6315<br>(5953 to 6544)       | 19.6<br>(18.42 to 20.3)         | 11616<br>(10433 to 12532)    | 16.22<br>(14.74 to 17.44)       | -0.67<br>(-0.72 to -0.61) |
| Central African<br>Republic            | 81<br>(60 to 104)            | 7.43<br>(5.78 to 9.42)          | 128<br>(92 to 178)           | 6.37<br>(4.71 to 8.79)          | -0.44<br>(-0.5 to -0.38)  |
| Chad                                   | 142<br>(110 to 177)          | 5.33<br>(4.13 to 6.66)          | 369<br>(285 to 480)          | 7.37<br>(5.77 to 9.35)          | 1.27<br>(1.2 to 1.34)     |
| Chile                                  | 1167<br>(1105 to 1215)       | 12.69<br>(11.97 to 13.22)       | 3524<br>(3224 to 3795)       | 14.71<br>(13.46 to 15.85)       | 0.74<br>(0.65 to 0.83)    |
| China                                  | 79322<br>(69661 to 89295)    | 10.18<br>(9.03 to 11.37)        | 261777<br>(224404 to 303318) | 13.86<br>(11.92 to 16.01)       | 1.39<br>(1.14 to 1.63)    |

| Countries                                   | 1990                         |                                 | 2019                         |                                 | 1990-2019                 |
|---------------------------------------------|------------------------------|---------------------------------|------------------------------|---------------------------------|---------------------------|
|                                             | Number of deaths<br>(95% UI) | ASDR per<br>100,000<br>(95% UI) | Number of deaths<br>(95% UI) | ASDR per<br>100,000<br>(95% UI) | EAPC of ASDR<br>(95% CI)  |
| Colombia                                    | 1544<br>(1469 to 1612)       | 9.43<br>(8.85 to 9.89)          | 5138<br>(3990 to 6532)       | 9.63<br>(7.48 to 12.24)         | 0.01<br>(-0.09 to 0.11)   |
| Comoros                                     | 16<br>(10 to 22)             | 7.87<br>(5.04 to 10.42)         | 39<br>(29 to 50)             | 8.56<br>(6.39 to 10.8)          | 0.17<br>(0.07 to 0.27)    |
| Congo                                       | 116<br>(77 to 154)           | 11.76<br>(8.29 to 15.34)        | 266<br>(197 to 352)          | 11.4<br>(8.76 to 14.52)         | -0.17<br>(-0.36 to 0.02)  |
| Cook Islands                                | 1<br>(1 to 1)                | 8.39<br>(7.01 to 9.8)           | 2<br>(2 to 2)                | 7.77<br>(6.54 to 9.34)          | -0.37<br>(-0.58 to -0.16) |
| Costa Rica                                  | 164<br>(152 to 174)          | 9.67<br>(8.94 to 10.28)         | 788<br>(622 to 986)          | 15.38<br>(12.15 to 19.28)       | 1.72<br>(1.6 to 1.84)     |
| Côte d'Ivoire                               | 307<br>(238 to 393)          | 8.89<br>(6.99 to 11.28)         | 850<br>(663 to 1066)         | 9.41<br>(7.62 to 11.47)         | -0.02<br>(-0.12 to 0.08)  |
| Croatia                                     | 1387<br>(1304 to 1472)       | 22.69<br>(21.28 to 24.04)       | 2308<br>(1843 to 2847)       | 25.28<br>(20.14 to 31.22)       | 0.73<br>(0.54 to 0.92)    |
| Cuba                                        | 1571<br>(1485 to 1635)       | 15.5<br>(14.61 to 16.16)        | 3481<br>(2883 to 4186)       | 17.83<br>(14.73 to 21.48)       | 0.44<br>(0.31 to 0.57)    |
| Cyprus                                      | 96<br>(84 to 109)            | 13.28<br>(11.7 to 15.1)         | 265<br>(230 to 301)          | 14.32<br>(12.4 to 16.32)        | 0.5<br>(0.28 to 0.73)     |
| Czechia                                     | 4644<br>(4475 to 4785)       | 33.76<br>(32.41 to 34.8)        | 4678<br>(3864 to 5626)       | 21.58<br>(17.8 to 25.98)        | -1.69<br>(-1.88 to -1.5)  |
| Democratic<br>People's Republic<br>of Korea | 1642<br>(1251 to 2130)       | 10.62<br>(8.4 to 13.46)         | 3442<br>(2576 to 4380)       | 10.89<br>(8.14 to 13.82)        | 0.19<br>(0.13 to 0.26)    |
| Democratic<br>Republic of the<br>Congo      | 947<br>(738 to 1272)         | 6.87<br>(5.3 to 9.63)           | 1995<br>(1339 to 2956)       | 6.23<br>(4.15 to 9.51)          | -0.49<br>(-0.81 to -0.17) |
| Denmark                                     | 2046<br>(1947 to 2122)       | 24.5<br>(23.43 to 25.37)        | 2647<br>(2396 to 2872)       | 21.75<br>(19.76 to 23.49)       | -0.81<br>(-1.04 to -0.58) |
| Djibouti                                    | 11<br>(8 to 16)              | 9<br>(6.42 to 12.11)            | 59<br>(43 to 82)             | 11.19<br>(8.66 to 14.66)        | 0.78<br>(0.72 to 0.83)    |
| Dominica                                    | 9<br>(8 to 10)               | 12.12<br>(10.75 to 13.52)       | 14<br>(11 to 16)             | 14.96<br>(12.42 to 18.09)       | 0.94<br>(0.87 to 1.01)    |
| Dominican<br>Republic                       | 259<br>(228 to 291)          | 7.56<br>(6.6 to 8.51)           | 1115<br>(823 to 1448)        | 12.42<br>(9.23 to 16.14)        | 2.4<br>(2.19 to 2.61)     |
| Ecuador                                     | 366<br>(343 to 388)          | 7.37<br>(6.85 to 7.83)          | 1603<br>(1285 to 2008)       | 11.34<br>(9.07 to 14.16)        | 2.09<br>(1.78 to 2.4)     |
| Egypt                                       | 1552<br>(1423 to 1680)       | 5.46<br>(4.95 to 5.89)          | 4557<br>(3300 to 6275)       | 7.45<br>(5.4 to 10.11)          | 1.12<br>(1.04 to 1.19)    |
| El Salvador                                 | 141<br>(130 to 151)          | 4.82<br>(4.4 to 5.18)           | 552<br>(426 to 710)          | 9.05<br>(6.98 to 11.68)         | 2.03<br>(1.71 to 2.35)    |



| Countries         | 1990                         |                                 | 2019                         |                                 | 1990-2019                 |
|-------------------|------------------------------|---------------------------------|------------------------------|---------------------------------|---------------------------|
|                   | Number of deaths<br>(95% UI) | ASDR per<br>100,000<br>(95% UI) | Number of deaths<br>(95% UI) | ASDR per<br>100,000<br>(95% UI) | EAPC of ASDR<br>(95% CI)  |
| Equatorial Guinea | 12<br>(8 to 17)              | 6.52<br>(4.46 to 8.78)          | 61<br>(38 to 89)             | 14.24<br>(9.12 to 20.02)        | 3.51<br>(3.23 to 3.8)     |
| Eritrea           | 62<br>(44 to 83)             | 6.55<br>(4.74 to 8.79)          | 247<br>(189 to 322)          | 9.97<br>(7.87 to 12.7)          | 1.19<br>(0.91 to 1.48)    |
| Estonia           | 396<br>(378 to 414)          | 19.42<br>(18.49 to 20.27)       | 528<br>(425 to 660)          | 18.51<br>(14.81 to 23.22)       | -0.1<br>(-0.31 to 0.11)   |
| Eswatini          | 27<br>(20 to 34)             | 10.24<br>(7.87 to 13.05)        | 70<br>(47 to 96)             | 13.52<br>(9.32 to 18.23)        | 1.06<br>(0.71 to 1.42)    |
| Ethiopia          | 1405<br>(1008 to 2166)       | 7.33<br>(5.07 to 11.43)         | 2855<br>(2128 to 4003)       | 7.33<br>(5.47 to 10.36)         | -0.1<br>(-0.34 to 0.14)   |
| Fiji              | 30<br>(24 to 36)             | 9.36<br>(7.69 to 11.17)         | 75<br>(59 to 93)             | 11.65<br>(9.51 to 14.2)         | 0.89<br>(0.71 to 1.07)    |
| Finland           | 1050<br>(995 to 1093)        | 14.62<br>(13.81 to 15.22)       | 1616<br>(1455 to 1756)       | 12.33<br>(11.25 to 13.35)       | -0.66<br>(-0.72 to -0.6)  |
| France            | 20261<br>(19037 to 21246)    | 23.53<br>(22.15 to 24.58)       | 25497<br>(22330 to 27996)    | 16.41<br>(14.69 to 17.82)       | -1.42<br>(-1.49 to -1.35) |
| Gabon             | 75<br>(50 to 111)            | 14.37<br>(9.71 to 21.11)        | 141<br>(103 to 177)          | 14.86<br>(11.25 to 18.24)       | -0.01<br>(-0.08 to 0.06)  |
| Gambia            | 15<br>(12 to 19)             | 4.72<br>(3.77 to 5.81)          | 58<br>(43 to 78)             | 6.56<br>(4.78 to 8.76)          | 0.99<br>(0.85 to 1.14)    |
| Georgia           | 673<br>(619 to 731)          | 11.08<br>(10.21 to 12.04)       | 782<br>(659 to 913)          | 13.19<br>(11.08 to 15.44)       | 1.66<br>(1.11 to 2.2)     |
| Germany           | 31780<br>(30043 to 33032)    | 24.4<br>(23.04 to 25.31)        | 37552<br>(34131 to 40326)    | 18.01<br>(16.54 to 19.26)       | -1.45<br>(-2.06 to -0.84) |
| Ghana             | 354<br>(288 to 433)          | 6.28<br>(5.21 to 7.6)           | 1273<br>(1003 to 1615)       | 8.76<br>(6.96 to 10.92)         | 1.19<br>(1.16 to 1.22)    |
| Greece            | 2132<br>(2017 to 2227)       | 14.19<br>(13.35 to 14.86)       | 4000<br>(3600 to 4305)       | 14.87<br>(13.67 to 15.87)       | -0.36<br>(-0.58 to -0.13) |
| Greenland         | 9<br>(8 to 11)               | 29.76<br>(26.59 to 33.5)        | 20<br>(16 to 24)             | 31.38<br>(26.04 to 37.13)       | -0.25<br>(-0.56 to 0.06)  |
| Grenada           | 11<br>(10 to 12)             | 14.21<br>(12.93 to 15.52)       | 20<br>(18 to 22)             | 19.29<br>(17.44 to 21.14)       | 1.16<br>(1.03 to 1.28)    |
| Guam              | 11<br>(9 to 12)              | 17.11<br>(13.91 to 20.21)       | 27<br>(22 to 31)             | 14.16<br>(12.02 to 16.74)       | -0.64<br>(-1.02 to -0.26) |
| Guatemala         | 168<br>(149 to 187)          | 5.11<br>(4.57 to 5.65)          | 965<br>(771 to 1208)         | 9.09<br>(7.32 to 11.27)         | 1.87<br>(1.54 to 2.21)    |
| Guinea            | 176<br>(148 to 205)          | 5.74<br>(4.81 to 6.67)          | 370<br>(282 to 480)          | 7.24<br>(5.51 to 9.24)          | 0.89<br>(0.86 to 0.92)    |
| Guinea-Bissau     | 33<br>(22 to 41)             | 8.56<br>(6.18 to 10.77)         | 59<br>(44 to 74)             | 9.06<br>(6.93 to 11.29)         | 0.24<br>(0.2 to 0.28)     |

| Countries                     | 1990                         |                                 | 2019                         |                                 | 1990-2019                 |
|-------------------------------|------------------------------|---------------------------------|------------------------------|---------------------------------|---------------------------|
|                               | Number of deaths<br>(95% UI) | ASDR per<br>100,000<br>(95% UI) | Number of deaths<br>(95% UI) | ASDR per<br>100,000<br>(95% UI) | EAPC of ASDR<br>(95% CI)  |
| Guyana                        | 46<br>(40 to 52)             | 12.75<br>(11.2 to 14.37)        | 85<br>(68 to 107)            | 14.68<br>(11.87 to 18.25)       | 0.42<br>(0.27 to 0.58)    |
| Haiti                         | 301<br>(197 to 370)          | 10.03<br>(6.7 to 12.14)         | 671<br>(467 to 917)          | 10.53<br>(7.33 to 14.09)        | 0.35<br>(0.26 to 0.43)    |
| Honduras                      | 95<br>(76 to 111)            | 4.7<br>(3.72 to 5.53)           | 430<br>(303 to 605)          | 7.65<br>(5.34 to 10.67)         | 1.77<br>(1.64 to 1.91)    |
| Hungary                       | 4421<br>(4239 to 4587)       | 30.7<br>(29.38 to 31.89)        | 5646<br>(4699 to 6700)       | 28.56<br>(23.65 to 34.03)       | -0.44<br>(-0.61 to -0.26) |
| Iceland                       | 43<br>(40 to 46)             | 14.7<br>(13.54 to 15.74)        | 70<br>(61 to 78)             | 11.81<br>(10.53 to 13.16)       | -0.93<br>(-1.11 to -0.76) |
| India                         | 21971<br>(19162 to 25095)    | 5.47<br>(4.77 to 6.25)          | 79098<br>(67137 to 92724)    | 7.5<br>(6.35 to 8.76)           | 0.91<br>(0.77 to 1.06)    |
| Indonesia                     | 8267<br>(6315 to 9807)       | 8.94<br>(6.9 to 10.57)          | 30242<br>(20642 to 38807)    | 15.58<br>(10.54 to 19.86)       | 1.92<br>(1.83 to 2.02)    |
| Iran (Islamic<br>Republic of) | 1665<br>(1369 to 1997)       | 7.17<br>(5.85 to 8.59)          | 6413<br>(5903 to 6908)       | 9.31<br>(8.53 to 10.08)         | 1.11<br>(0.95 to 1.27)    |
| Iraq                          | 541<br>(395 to 739)          | 7.2<br>(5.27 to 9.77)           | 1797<br>(1401 to 2258)       | 8.32<br>(6.58 to 10.16)         | 0.72<br>(0.52 to 0.93)    |
| Ireland                       | 1035<br>(991 to 1076)        | 25.68<br>(24.49 to 26.65)       | 1377<br>(1242 to 1498)       | 18.01<br>(16.26 to 19.51)       | -1.38<br>(-1.44 to -1.32) |
| Israel                        | 1036<br>(976 to 1085)        | 22.01<br>(20.69 to 23.07)       | 2008<br>(1797 to 2172)       | 16.56<br>(14.91 to 17.85)       | -1.8<br>(-2.11 to -1.48)  |
| Italy                         | 17360<br>(16678 to 17759)    | 19.47<br>(18.63 to 19.95)       | 24877<br>(22016 to 26457)    | 15.83<br>(14.41 to 16.7)        | -0.89<br>(-1 to -0.77)    |
| Jamaica                       | 193<br>(179 to 206)          | 10.65<br>(9.88 to 11.32)        | 501<br>(405 to 615)          | 16.52<br>(13.35 to 20.35)       | 1.64<br>(1.34 to 1.93)    |
| Japan                         | 30608<br>(29005 to 31368)    | 18.7<br>(17.61 to 19.23)        | 63742<br>(53256 to 69584)    | 15.85<br>(13.93 to 16.93)       | -0.68<br>(-0.73 to -0.63) |
| Jordan                        | 154<br>(125 to 188)          | 12.41<br>(9.99 to 15.13)        | 754<br>(628 to 901)          | 13.07<br>(10.93 to 15.46)       | 0.35<br>(0.24 to 0.45)    |
| Kazakhstan                    | 1881<br>(1788 to 1975)       | 15.15<br>(14.37 to 15.9)        | 2190<br>(1906 to 2491)       | 13.5<br>(11.79 to 15.28)        | -0.17<br>(-0.32 to -0.02) |
| Kenya                         | 392<br>(255 to 486)          | 5.13<br>(3.36 to 6.37)          | 1628<br>(1282 to 2038)       | 8.14<br>(6.52 to 10.04)         | 1.95<br>(1.77 to 2.14)    |
| Kiribati                      | 4<br>(3 to 5)                | 10.85<br>(8.88 to 12.99)        | 7<br>(5 to 9)                | 10.76<br>(8.26 to 14.05)        | -0.2<br>(-0.26 to -0.14)  |
| Kuwait                        | 40<br>(36 to 44)             | 7.36<br>(6.44 to 8.29)          | 223<br>(187 to 265)          | 10.14<br>(8.41 to 12.04)        | 1.93<br>(1.46 to 2.41)    |
| Kyrgyzstan                    | 343<br>(321 to 366)          | 11.34<br>(10.63 to 12.12)       | 346<br>(304 to 394)          | 8.24<br>(7.25 to 9.34)          | -1.17<br>(-1.38 to -0.96) |

| Countries                              | 1990                         |                                 | 2019                         |                                 | 1990-2019                 |
|----------------------------------------|------------------------------|---------------------------------|------------------------------|---------------------------------|---------------------------|
|                                        | Number of deaths<br>(95% UI) | ASDR per<br>100,000<br>(95% UI) | Number of deaths<br>(95% UI) | ASDR per<br>100,000<br>(95% UI) | EAPC of ASDR<br>(95% CI)  |
| Lao People's<br>Democratic<br>Republic | 206<br>(139 to 274)          | 10.23<br>(7.16 to 13.55)        | 545<br>(389 to 721)          | 13.33<br>(9.6 to 17.23)         | 0.76<br>(0.7 to 0.82)     |
| Latvia                                 | 643<br>(616 to 668)          | 17.98<br>(17.21 to 18.68)       | 746<br>(626 to 891)          | 17.63<br>(14.77 to 21.21)       | -0.07<br>(-0.33 to 0.18)  |
| Lebanon                                | 275<br>(216 to 346)          | 13.42<br>(10.63 to 16.76)       | 910<br>(740 to 1199)         | 17.55<br>(14.26 to 23.15)       | 1.45<br>(1.27 to 1.63)    |
| Lesotho                                | 58<br>(45 to 83)             | 6.52<br>(5.12 to 9.38)          | 132<br>(96 to 174)           | 11.67<br>(8.66 to 15.1)         | 2.43<br>(2.25 to 2.61)    |
| Liberia                                | 70<br>(58 to 84)             | 6.81<br>(5.74 to 8.13)          | 120<br>(81 to 171)           | 6.68<br>(4.57 to 9.51)          | 0.43<br>(0.09 to 0.78)    |
| Libya                                  | 216<br>(154 to 313)          | 11.93<br>(8.5 to 17.2)          | 620<br>(452 to 801)          | 12.45<br>(9.07 to 15.84)        | 0.37<br>(0.21 to 0.52)    |
| Lithuania                              | 746<br>(715 to 780)          | 16.62<br>(15.9 to 17.38)        | 1024<br>(857 to 1221)        | 16.9<br>(14.05 to 20.27)        | 0.09<br>(-0.11 to 0.29)   |
| Luxembourg                             | 147<br>(138 to 156)          | 27<br>(25.25 to 28.53)          | 170<br>(147 to 192)          | 15.97<br>(13.87 to 18.08)       | -1.99<br>(-2.16 to -1.81) |
| Madagascar                             | 333<br>(269 to 391)          | 6.82<br>(5.56 to 7.9)           | 714<br>(528 to 957)          | 7.11<br>(5.27 to 9.34)          | 0.08<br>(0.02 to 0.15)    |
| Malawi                                 | 165<br>(139 to 191)          | 4.76<br>(4.03 to 5.41)          | 402<br>(308 to 507)          | 6.06<br>(4.74 to 7.49)          | 0.97<br>(0.82 to 1.12)    |
| Malaysia                               | 1368<br>(1200 to 1544)       | 16.26<br>(14.03 to 18.72)       | 4838<br>(3829 to 5962)       | 20.32<br>(16.15 to 24.85)       | 0.17<br>(-0.06 to 0.39)   |
| Maldives                               | 7<br>(5 to 9)                | 9.2<br>(6.96 to 11.44)          | 24<br>(19 to 28)             | 8.71<br>(7.13 to 10.38)         | -0.66<br>(-0.83 to -0.48) |
| Mali                                   | 248<br>(210 to 290)          | 6.54<br>(5.56 to 7.59)          | 615<br>(487 to 773)          | 7.84<br>(6.29 to 9.73)          | 0.64<br>(0.59 to 0.69)    |
| Malta                                  | 70<br>(65 to 75)             | 17<br>(15.79 to 18.12)          | 136<br>(120 to 154)          | 14.08<br>(12.38 to 15.89)       | -0.58<br>(-0.68 to -0.48) |
| Marshall Islands                       | 2<br>(1 to 2)                | 10.9<br>(8.99 to 13.23)         | 4<br>(3 to 5)                | 12.29<br>(9.55 to 15.44)        | 0.45<br>(0.4 to 0.51)     |
| Mauritania                             | 80<br>(60 to 98)             | 8.57<br>(6.45 to 10.46)         | 156<br>(119 to 195)          | 8.35<br>(6.53 to 10.34)         | 0.02<br>(-0.13 to 0.17)   |
| Mauritius                              | 56<br>(53 to 60)             | 8.21<br>(7.67 to 8.77)          | 215<br>(176 to 261)          | 12.77<br>(10.53 to 15.5)        | 1.53<br>(1.38 to 1.67)    |
| Mexico                                 | 2600<br>(2496 to 2670)       | 6.52<br>(6.18 to 6.73)          | 10518<br>(9036 to 12022)     | 9.24<br>(7.95 to 10.52)         | 1.3<br>(1.21 to 1.39)     |
| Micronesia<br>(Federated States<br>of) | 5<br>(4 to 6)                | 11.29<br>(8.71 to 14.05)        | 8<br>(6 to 11)               | 13.08<br>(9.5 to 16.86)         | 0.44<br>(0.41 to 0.46)    |

| Countries                   | 1990                         |                                 | 2019                         |                                 | 1990-2019                 |
|-----------------------------|------------------------------|---------------------------------|------------------------------|---------------------------------|---------------------------|
|                             | Number of deaths<br>(95% UI) | ASDR per<br>100,000<br>(95% UI) | Number of deaths<br>(95% UI) | ASDR per<br>100,000<br>(95% UI) | EAPC of ASDR<br>(95% CI)  |
| Monaco                      | 17<br>(14 to 21)             | 22.69<br>(18.18 to 27.39)       | 25<br>(21 to 30)             | 24.27<br>(19.64 to 28.78)       | 0.35<br>(0.25 to 0.44)    |
| Mongolia                    | 89<br>(73 to 105)            | 8.76<br>(7.23 to 10.35)         | 193<br>(150 to 248)          | 9.31<br>(7.44 to 11.69)         | -0.22<br>(-0.37 to -0.07) |
| Montenegro                  | 86<br>(72 to 98)             | 14.21<br>(12.03 to 16.2)        | 168<br>(137 to 200)          | 17.23<br>(14.08 to 20.4)        | 1<br>(0.92 to 1.09)       |
| Morocco                     | 807<br>(643 to 943)          | 6.25<br>(4.88 to 7.34)          | 2482<br>(1856 to 3110)       | 8.48<br>(6.31 to 10.51)         | 1.01<br>(0.86 to 1.16)    |
| Mozambique                  | 266<br>(220 to 316)          | 5.15<br>(4.31 to 6)             | 832<br>(607 to 1092)         | 8.66<br>(6.46 to 11.2)          | 2.23<br>(2.09 to 2.37)    |
| Myanmar                     | 1989<br>(1548 to 2705)       | 8.91<br>(7.02 to 12.1)          | 5582<br>(4135 to 7152)       | 12.82<br>(9.6 to 16.23)         | 1.4<br>(1.31 to 1.49)     |
| Namibia                     | 38<br>(31 to 47)             | 5.74<br>(4.64 to 6.91)          | 113<br>(89 to 143)           | 8.68<br>(6.97 to 10.81)         | 1.57<br>(1.47 to 1.67)    |
| Nauru                       | 1<br>(0 to 1)                | 18.15<br>(12.23 to 25.69)       | 1<br>(0 to 1)                | 16.55<br>(11.75 to 21.15)       | -0.48<br>(-0.72 to -0.25) |
| Nepal                       | 313<br>(208 to 435)          | 3.62<br>(2.33 to 5.14)          | 1084<br>(781 to 1501)        | 5.4<br>(3.89 to 7.42)           | 1.42<br>(1.21 to 1.64)    |
| Netherlands                 | 4658<br>(4378 to 4846)       | 23.05<br>(21.68 to 23.95)       | 7774<br>(7036 to 8444)       | 21.75<br>(19.8 to 23.55)        | -0.23<br>(-0.35 to -0.12) |
| New Zealand                 | 1141<br>(1082 to 1191)       | 29.52<br>(27.87 to 30.79)       | 1648<br>(1481 to 1780)       | 20.26<br>(18.34 to 21.79)       | -1.46<br>(-1.57 to -1.36) |
| Nicaragua                   | 91<br>(76 to 106)            | 6.25<br>(5.12 to 7.49)          | 430<br>(362 to 502)          | 10.86<br>(9.23 to 12.5)         | 2.06<br>(1.81 to 2.31)    |
| Niger                       | 134<br>(102 to 176)          | 5.44<br>(4.17 to 7.06)          | 374<br>(276 to 510)          | 5.62<br>(4.24 to 7.51)          | 0.18<br>(0.09 to 0.28)    |
| Nigeria                     | 2486<br>(1798 to 3302)       | 6.39<br>(4.67 to 8.32)          | 6382<br>(4884 to 8138)       | 8.63<br>(6.75 to 10.78)         | 1.44<br>(1.26 to 1.63)    |
| Niue                        | 0<br>(0 to 0)                | 12.79<br>(10.66 to 15.3)        | 0<br>(0 to 0)                | 13.61<br>(10.77 to 17.01)       | 0.19<br>(0.15 to 0.22)    |
| North Macedonia             | 270<br>(246 to 290)          | 15.05<br>(13.77 to 16.19)       | 683<br>(545 to 850)          | 22.13<br>(17.8 to 27.27)        | 1.48<br>(1.21 to 1.75)    |
| Northern Mariana<br>Islands | 3<br>(2 to 4)                | 19.68<br>(15.87 to 23.99)       | 8<br>(7 to 9)                | 18.34<br>(15.88 to 20.86)       | -0.23<br>(-0.36 to -0.1)  |
| Norway                      | 1611<br>(1519 to 1664)       | 22.69<br>(21.47 to 23.4)        | 2035<br>(1838 to 2176)       | 19.84<br>(18.04 to 21.11)       | -0.46<br>(-0.59 to -0.32) |
| Oman                        | 45<br>(31 to 62)             | 7.73<br>(5.36 to 10.43)         | 133<br>(108 to 167)          | 10.2<br>(8.48 to 12.04)         | 1.4<br>(1.19 to 1.62)     |
| Pakistan                    | 2968<br>(2546 to 3430)       | 5.43<br>(4.66 to 6.3)           | 8605<br>(6927 to 10776)      | 8.34<br>(6.72 to 10.41)         | 1.41<br>(1.17 to 1.64)    |



| Countries                           | 1990                         |                                 | 2019                         |                                 | 1990-2019                 |
|-------------------------------------|------------------------------|---------------------------------|------------------------------|---------------------------------|---------------------------|
|                                     | Number of deaths<br>(95% UI) | ASDR per<br>100,000<br>(95% UI) | Number of deaths<br>(95% UI) | ASDR per<br>100,000<br>(95% UI) | EAPC of ASDR<br>(95% CI)  |
| Palau                               | 1<br>(1 to 2)                | 13.78<br>(10.71 to 17.67)       | 2<br>(2 to 3)                | 13.69<br>(10.87 to 16.66)       | -0.06<br>(-0.12 to 0.01)  |
| Palestine                           | 123<br>(84 to 169)           | 14.78<br>(10.08 to 20.25)       | 419<br>(358 to 487)          | 19.6<br>(16.69 to 22.68)        | 1.11<br>(0.88 to 1.35)    |
| Panama                              | 127<br>(118 to 136)          | 8.76<br>(8.06 to 9.36)          | 455<br>(357 to 576)          | 10.9<br>(8.54 to 13.81)         | 0.97<br>(0.89 to 1.05)    |
| Papua New<br>Guinea                 | 106<br>(71 to 142)           | 6.31<br>(4.24 to 8.41)          | 318<br>(229 to 425)          | 7.46<br>(5.48 to 9.64)          | 0.5<br>(0.46 to 0.54)     |
| Paraguay                            | 135<br>(120 to 151)          | 6.34<br>(5.61 to 7.12)          | 652<br>(507 to 824)          | 12.16<br>(9.47 to 15.31)        | 2.57<br>(2.36 to 2.78)    |
| Peru                                | 896<br>(769 to 1036)         | 7.85<br>(6.73 to 9.07)          | 3035<br>(2291 to 3931)       | 9.44<br>(7.12 to 12.25)         | 0.8<br>(0.58 to 1.02)     |
| Philippines                         | 3762<br>(3351 to 4195)       | 13.14<br>(11.71 to 14.61)       | 11193<br>(9309 to 13497)     | 14.89<br>(12.46 to 17.81)       | 0.3<br>(0.03 to 0.57)     |
| Poland                              | 9180<br>(8821 to 9404)       | 21.44<br>(20.51 to 22)          | 17768<br>(15129 to 20758)    | 24.72<br>(20.98 to 28.96)       | 0.32<br>(0.16 to 0.48)    |
| Portugal                            | 2966<br>(2839 to 3080)       | 22.17<br>(21.13 to 23.03)       | 5189<br>(4700 to 5586)       | 20.11<br>(18.52 to 21.52)       | -0.45<br>(-0.62 to -0.28) |
| Puerto Rico                         | 487<br>(459 to 512)          | 13.69<br>(12.84 to 14.39)       | 1136<br>(892 to 1429)        | 15.44<br>(12.15 to 19.55)       | 0.31<br>(0.09 to 0.53)    |
| Qatar                               | 11<br>(9 to 15)              | 14.04<br>(10.44 to 17.84)       | 83<br>(61 to 110)            | 16.48<br>(12.93 to 20.54)       | 1.15<br>(0.84 to 1.45)    |
| Republic of Korea                   | 3204<br>(3051 to 3377)       | 11.81<br>(11.16 to 12.63)       | 12004<br>(10649 to 13220)    | 13.87<br>(12.22 to 15.3)        | 0.15<br>(-0.08 to 0.38)   |
| Republic of<br>Moldova              | 798<br>(766 to 834)          | 18.1<br>(17.38 to 18.9)         | 1028<br>(897 to 1164)        | 17.66<br>(15.45 to 20.01)       | 0.72<br>(0.16 to 1.28)    |
| Romania                             | 3548<br>(3418 to 3674)       | 12.86<br>(12.39 to 13.31)       | 7577<br>(6281 to 9022)       | 20.18<br>(16.61 to 24.11)       | 1.35<br>(1.16 to 1.55)    |
| Russian<br>Federation               | 29696<br>(28699 to 30771)    | 16.71<br>(16.11 to 17.33)       | 42834<br>(37637 to 48395)    | 18.17<br>(15.96 to 20.54)       | 0.03<br>(-0.24 to 0.3)    |
| Rwanda                              | 242<br>(174 to 307)          | 8.78<br>(6.5 to 11.05)          | 480<br>(377 to 608)          | 8.79<br>(7.08 to 10.83)         | -0.34<br>(-0.55 to -0.13) |
| Saint Kitts and<br>Nevis            | 7<br>(6 to 8)                | 18.91<br>(17.37 to 20.42)       | 11<br>(9 to 13)              | 18.32<br>(15.84 to 21.11)       | 0.06<br>(-0.09 to 0.22)   |
| Saint Lucia                         | 10<br>(9 to 11)              | 12.12<br>(11.23 to 12.99)       | 25<br>(21 to 29)             | 12.08<br>(10.24 to 14.11)       | -0.39<br>(-0.67 to -0.11) |
| Saint Vincent and<br>the Grenadines | 8<br>(8 to 9)                | 11.83<br>(10.88 to 12.73)       | 19<br>(16 to 21)             | 14.42<br>(12.69 to 16.48)       | 0.64<br>(0.44 to 0.85)    |
| Samoa                               | 9<br>(7 to 10)               | 10.39<br>(8.79 to 12.45)        | 14<br>(11 to 17)             | 10.06<br>(8.18 to 12.34)        | -0.18<br>(-0.22 to -0.13) |

| Countries                | 1990                         |                                 | 2019                         |                                 | 1990-2019                 |
|--------------------------|------------------------------|---------------------------------|------------------------------|---------------------------------|---------------------------|
|                          | Number of deaths<br>(95% UI) | ASDR per<br>100,000<br>(95% UI) | Number of deaths<br>(95% UI) | ASDR per<br>100,000<br>(95% UI) | EAPC of ASDR<br>(95% CI)  |
| San Marino               | 8<br>(7 to 9)                | 23.63<br>(20.36 to 27.36)       | 15<br>(11 to 21)             | 21.24<br>(14.31 to 29.61)       | -0.16<br>(-0.25 to -0.07) |
| Sao Tome and<br>Principe | 6<br>(5 to 7)                | 9.79<br>(8.12 to 11.41)         | 14<br>(10 to 19)             | 15.18<br>(11.24 to 20.55)       | 1.58<br>(1.52 to 1.63)    |
| Saudi Arabia             | 367<br>(251 to 509)          | 6.76<br>(4.56 to 9.32)          | 1629<br>(1263 to 2045)       | 9.66<br>(7.79 to 11.64)         | 1.13<br>(0.89 to 1.37)    |
| Senegal                  | 224<br>(180 to 266)          | 7.6<br>(6.21 to 8.98)           | 585<br>(467 to 731)          | 8.7<br>(7.13 to 10.77)          | 0.61<br>(0.45 to 0.77)    |
| Serbia                   | 2275<br>(1843 to 2539)       | 21.09<br>(16.95 to 23.71)       | 4018<br>(3269 to 4943)       | 25.38<br>(20.63 to 31.01)       | 0.83<br>(0.67 to 0.98)    |
| Seychelles               | 9<br>(8 to 10)               | 16.5<br>(14.85 to 18.14)        | 26<br>(23 to 29)             | 25.33<br>(22.17 to 28.67)       | 1.12<br>(0.88 to 1.37)    |
| Sierra Leone             | 111<br>(88 to 134)           | 6.17<br>(4.98 to 7.42)          | 225<br>(172 to 290)          | 6.96<br>(5.44 to 8.86)          | 0.64<br>(0.49 to 0.79)    |
| Singapore                | 502<br>(479 to 522)          | 24.8<br>(23.48 to 25.94)        | 1111<br>(991 to 1197)        | 14.89<br>(13.22 to 16.12)       | -2.06<br>(-2.19 to -1.94) |
| Slovakia                 | 1411<br>(1340 to 1479)       | 23.75<br>(22.58 to 24.88)       | 2433<br>(1932 to 3038)       | 26.31<br>(20.96 to 32.8)        | 0.31<br>(0.13 to 0.49)    |
| Slovenia                 | 526<br>(413 to 662)          | 21.69<br>(17.07 to 27.36)       | 913<br>(720 to 1163)         | 19.84<br>(15.58 to 25.45)       | -0.5<br>(-0.79 to -0.21)  |
| Solomon Islands          | 11<br>(7 to 17)              | 8.48<br>(5.85 to 11.85)         | 31<br>(20 to 42)             | 10.43<br>(7.38 to 13.29)        | 0.6<br>(0.5 to 0.7)       |
| Somalia                  | 126<br>(86 to 191)           | 5.32<br>(3.71 to 8.01)          | 310<br>(197 to 580)          | 5.01<br>(3.17 to 9.27)          | 0<br>(-0.09 to 0.09)      |
| South Africa             | 2030<br>(1721 to 2492)       | 10.39<br>(8.75 to 12.96)        | 4601<br>(4159 to 5198)       | 11.21<br>(10.13 to 12.6)        | 0.27<br>(0.03 to 0.51)    |
| South Sudan              | 228<br>(137 to 371)          | 10.28<br>(6.28 to 16.58)        | 346<br>(223 to 528)          | 9.99<br>(6.57 to 14.78)         | -0.03<br>(-0.11 to 0.05)  |
| Spain                    | 10285<br>(9693 to 10729)     | 18.95<br>(17.84 to 19.77)       | 20011<br>(17768 to 21746)    | 18.85<br>(17.05 to 20.21)       | -0.01<br>(-0.06 to 0.05)  |
| Sri Lanka                | 478<br>(433 to 525)          | 4.89<br>(4.41 to 5.37)          | 1510<br>(1129 to 1967)       | 6.41<br>(4.81 to 8.26)          | 1.32<br>(1.2 to 1.44)     |
| Sudan                    | 447<br>(340 to 664)          | 5.02<br>(3.85 to 7.52)          | 1256<br>(901 to 1851)        | 7.1<br>(5.26 to 10.59)          | 1.31<br>(1.21 to 1.41)    |
| Suriname                 | 31<br>(28 to 33)             | 12.33<br>(11.16 to 13.32)       | 94<br>(78 to 111)            | 16.26<br>(13.57 to 19.24)       | 1.06<br>(0.82 to 1.3)     |
| Sweden                   | 2854<br>(2672 to 2983)       | 18.2<br>(17.12 to 18.95)        | 3623<br>(3273 to 3863)       | 15.96<br>(14.67 to 16.96)       | -0.54<br>(-0.68 to -0.4)  |
| Switzerland              | 1513<br>(1424 to 1578)       | 14.06<br>(13.29 to 14.64)       | 2234<br>(1980 to 2431)       | 11.85<br>(10.7 to 12.84)        | -0.85<br>(-1.03 to -0.67) |

| Countries                    | 1990                         |                                 | 2019                         |                                 | 1990-2019                 |
|------------------------------|------------------------------|---------------------------------|------------------------------|---------------------------------|---------------------------|
|                              | Number of deaths<br>(95% UI) | ASDR per<br>100,000<br>(95% UI) | Number of deaths<br>(95% UI) | ASDR per<br>100,000<br>(95% UI) | EAPC of ASDR<br>(95% CI)  |
| Syrian Arab Republic         | 283<br>(219 to 360)          | 5.52<br>(4.27 to 6.93)          | 685<br>(499 to 908)          | 6.28<br>(4.7 to 8.15)           | 0.33<br>(0.12 to 0.54)    |
| Taiwan (Province of China)   | 2343<br>(2258 to 2418)       | 15.54<br>(14.83 to 16.05)       | 10386<br>(8282 to 13153)     | 26.26<br>(20.88 to 33.29)       | 1.83<br>(1.61 to 2.04)    |
| Tajikistan                   | 260<br>(240 to 284)          | 8.87<br>(8.17 to 9.66)          | 428<br>(347 to 526)          | 10.22<br>(8.41 to 12.35)        | 1.13<br>(0.68 to 1.58)    |
| Thailand                     | 3572<br>(3165 to 3996)       | 10.78<br>(9.5 to 12.07)         | 10533<br>(7839 to 13572)     | 10.54<br>(7.88 to 13.56)        | -0.62<br>(-0.89 to -0.35) |
| Timor-Leste                  | 20<br>(15 to 27)             | 7.48<br>(5.61 to 9.89)          | 93<br>(64 to 119)            | 12.29<br>(8.48 to 15.79)        | 2.13<br>(1.88 to 2.38)    |
| Togo                         | 79<br>(66 to 94)             | 7.04<br>(5.94 to 8.35)          | 246<br>(181 to 320)          | 7.88<br>(5.9 to 10.04)          | 0.35<br>(0.31 to 0.38)    |
| Tokelau                      | 0<br>(0 to 0)                | 9.89<br>(7.94 to 12.21)         | 0<br>(0 to 0)                | 10.85<br>(8.14 to 13.95)        | 0.36<br>(0.33 to 0.39)    |
| Tonga                        | 3<br>(2 to 4)                | 6.04<br>(4.97 to 7.1)           | 5<br>(4 to 7)                | 6.91<br>(5.4 to 8.68)           | 0.37<br>(0.24 to 0.5)     |
| Trinidad and Tobago          | 122<br>(114 to 128)          | 15.49<br>(14.48 to 16.34)       | 253<br>(194 to 326)          | 13.97<br>(10.74 to 17.96)       | -0.53<br>(-0.65 to -0.4)  |
| Tunisia                      | 361<br>(292 to 431)          | 8.08<br>(6.56 to 9.66)          | 1154<br>(843 to 1546)        | 9.73<br>(7.17 to 12.98)         | 0.53<br>(0.45 to 0.61)    |
| Turkey                       | 4576<br>(3636 to 5557)       | 13.24<br>(10.44 to 16.04)       | 11194<br>(9055 to 13549)     | 13.11<br>(10.62 to 15.83)       | 0.26<br>(-0.21 to 0.72)   |
| Turkmenistan                 | 146<br>(139 to 154)          | 7.37<br>(7.01 to 7.76)          | 254<br>(207 to 314)          | 7.08<br>(5.81 to 8.71)          | -0.38<br>(-0.81 to 0.05)  |
| Tuvalu                       | 1<br>(1 to 1)                | 10.08<br>(8.15 to 12.07)        | 1<br>(1 to 1)                | 10.9<br>(8.08 to 13.99)         | 0.12<br>(0.07 to 0.17)    |
| Uganda                       | 404<br>(330 to 474)          | 6.77<br>(5.61 to 7.86)          | 1519<br>(1194 to 1857)       | 11.55<br>(9.24 to 13.75)        | 1.84<br>(1.63 to 2.06)    |
| Ukraine                      | 15303<br>(14793 to 15836)    | 21.46<br>(20.74 to 22.22)       | 14582<br>(12548 to 16939)    | 19.18<br>(16.46 to 22.37)       | -1.16<br>(-1.46 to -0.85) |
| United Arab Emirates         | 56<br>(37 to 77)             | 18.55<br>(11.88 to 24.75)       | 449<br>(306 to 608)          | 17.4<br>(11.94 to 24.35)        | -0.31<br>(-0.73 to 0.12)  |
| United Kingdom               | 22538<br>(21500 to 23104)    | 24.49<br>(23.35 to 25.09)       | 24220<br>(22210 to 25338)    | 18.09<br>(16.77 to 18.85)       | -1.28<br>(-1.41 to -1.15) |
| United Republic of Tanzania  | 790<br>(655 to 965)          | 7.9<br>(6.61 to 9.52)           | 2180<br>(1732 to 2794)       | 9.51<br>(7.74 to 11.82)         | 0.71<br>(0.62 to 0.8)     |
| United States of America     | 65582<br>(61888 to 67693)    | 20.05<br>(18.98 to 20.66)       | 84026<br>(77987 to 87516)    | 14.77<br>(13.86 to 15.32)       | -1.29<br>(-1.39 to -1.18) |
| United States Virgin Islands | 15<br>(13 to 17)             | 19.78<br>(16.9 to 22.59)        | 48<br>(40 to 55)             | 26.57<br>(22.3 to 31.01)        | 1.32<br>(1.11 to 1.53)    |

| Countries                                | 1990                         |                                 | 2019                         |                                 | 1990-2019                 |
|------------------------------------------|------------------------------|---------------------------------|------------------------------|---------------------------------|---------------------------|
|                                          | Number of deaths<br>(95% UI) | ASDR per<br>100,000<br>(95% UI) | Number of deaths<br>(95% UI) | ASDR per<br>100,000<br>(95% UI) | EAPC of ASDR<br>(95% CI)  |
| Uruguay                                  | 1069<br>(1008 to 1114)       | 27.53<br>(25.97 to 28.72)       | 1520<br>(1389 to 1630)       | 26.12<br>(24.14 to 27.82)       | -0.27<br>(-0.35 to -0.19) |
| Uzbekistan                               | 818<br>(776 to 857)          | 7.04<br>(6.67 to 7.38)          | 1626<br>(1381 to 1901)       | 10.35<br>(9.07 to 11.79)        | 1.49<br>(1.37 to 1.62)    |
| Vanuatu                                  | 5<br>(3 to 6)                | 7.69<br>(5.71 to 9.84)          | 15<br>(11 to 19)             | 9.29<br>(7.09 to 11.92)         | 0.5<br>(0.36 to 0.63)     |
| Venezuela<br>(Bolivarian<br>Republic of) | 800<br>(761 to 840)          | 8.65<br>(8.15 to 9.11)          | 3194<br>(2439 to 4131)       | 11.31<br>(8.72 to 14.59)        | 0.62<br>(0.48 to 0.76)    |
| Viet Nam                                 | 3484<br>(2819 to 4170)       | 8.98<br>(7.27 to 10.68)         | 15557<br>(12175 to 18985)    | 17.5<br>(13.92 to 21.05)        | 2.64<br>(2.51 to 2.77)    |
| Yemen                                    | 250<br>(161 to 364)          | 5.48<br>(3.53 to 7.97)          | 833<br>(626 to 1119)         | 6.66<br>(5.01 to 9.07)          | 1.01<br>(0.88 to 1.14)    |
| Zambia                                   | 276<br>(208 to 350)          | 10.42<br>(8.01 to 13.09)        | 791<br>(581 to 1018)         | 12.62<br>(9.51 to 15.96)        | 0.6<br>(0.57 to 0.64)     |
| Zimbabwe                                 | 362<br>(317 to 413)          | 10<br>(8.78 to 11.32)           | 818<br>(623 to 1031)         | 12.93<br>(9.93 to 16.2)         | 0.93<br>(0.71 to 1.16)    |

**Abbreviations:** ASDR, age-standardized death rate; EAPC, estimated annual percentage change; UI, uncertainty interval; CI, confidence



**Supplementary Table S3.** The death cases and age-standardized death rates of CRC attributable to all dietary risks in 1990 and 2019, and their temporal trends from 1990 to 2019.

| Characteristics                | 1990                         |                                 | 2019                         |                                 | 1990-2019                   |
|--------------------------------|------------------------------|---------------------------------|------------------------------|---------------------------------|-----------------------------|
|                                | Number of deaths<br>(95% UI) | ASDR per<br>100,000<br>(95% UI) | Number of deaths<br>(95% UI) | ASDR per<br>100,000<br>(95% UI) | EAPC of<br>ASDR<br>(95% CI) |
| <b>Global</b>                  | 179639<br>(138268 to 212910) | 4.95<br>(3.82 to 5.88)          | 365752<br>(272831 to 442144) | 4.61<br>(3.43 to 5.58)          | -0.29<br>(-0.36 to -0.22)   |
| <b>Socio-demographic index</b> |                              |                                 |                              |                                 |                             |
| Low SDI                        | 5264<br>(4118 to 6470)       | 2.47<br>(1.93 to 3.02)          | 13113<br>(10344 to 15521)    | 2.8<br>(2.21 to 3.3)            | 0.44<br>(0.4 to 0.48)       |
| Low-middle SDI                 | 13450<br>(10851 to 16003)    | 2.48<br>(2.01 to 2.94)          | 40684<br>(31498 to 48681)    | 3.2<br>(2.48 to 3.82)           | 0.89<br>(0.84 to 0.94)      |
| Middle SDI                     | 31652<br>(25701 to 36920)    | 3.36<br>(2.74 to 3.91)          | 98821<br>(75848 to 119915)   | 4.22<br>(3.25 to 5.11)          | 0.96<br>(0.82 to 1.11)      |
| High-middle SDI                | 57247<br>(42914 to 67890)    | 5.66<br>(4.23 to 6.74)          | 107586<br>(78263 to 131416)  | 5.35<br>(3.89 to 6.53)          | -0.32<br>(-0.43 to -0.2)    |
| High SDI                       | 71931<br>(53299 to 88470)    | 6.86<br>(5.09 to 8.43)          | 105343<br>(76588 to 129174)  | 5.25<br>(3.83 to 6.41)          | -1.04<br>(-1.11 to -0.98)   |
| <b>Region</b>                  |                              |                                 |                              |                                 |                             |
| Andean Latin America           | 564<br>(449 to 676)          | 2.95<br>(2.35 to 3.53)          | 1898<br>(1353 to 2444)       | 3.48<br>(2.48 to 4.49)          | 0.74<br>(0.61 to 0.87)      |
| Australasia                    | 1964<br>(1470 to 2385)       | 8.5<br>(6.37 to 10.32)          | 2954<br>(2192 to 3624)       | 5.74<br>(4.3 to 7.02)           | -1.66<br>(-1.77 to -1.54)   |
| Caribbean                      | 1111<br>(826 to 1321)        | 4.45<br>(3.31 to 5.3)           | 2502<br>(1734 to 3168)       | 4.84<br>(3.36 to 6.13)          | 0.25<br>(0.19 to 0.31)      |
| Central Asia                   | 1893<br>(1416 to 2257)       | 4.07<br>(3.04 to 4.86)          | 2610<br>(1915 to 3145)       | 3.91<br>(2.87 to 4.72)          | 0<br>(-0.11 to 0.12)        |
| Central Europe                 | 9516<br>(6656 to 11758)      | 6.65<br>(4.65 to 8.23)          | 15607<br>(10536 to 19885)    | 7.15<br>(4.84 to 9.09)          | 0.27<br>(0.16 to 0.38)      |
| Central Latin America          | 1895<br>(1455 to 2278)       | 2.44<br>(1.88 to 2.94)          | 7018<br>(4940 to 8989)       | 3.04<br>(2.14 to 3.89)          | 0.73<br>(0.69 to 0.78)      |
| Central Sub-Saharan Africa     | 591<br>(447 to 758)          | 2.98<br>(2.24 to 3.83)          | 1402<br>(1018 to 1854)       | 2.97<br>(2.14 to 4.03)          | -0.1<br>(-0.31 to 0.12)     |
| East Asia                      | 31018<br>(24137 to 36894)    | 3.86<br>(3.03 to 4.6)           | 95246<br>(69351 to 119482)   | 4.85<br>(3.55 to 6.08)          | 1.15<br>(0.9 to 1.4)        |
| Eastern Europe                 | 17925<br>(13335 to 21588)    | 6.47<br>(4.83 to 7.8)           | 19858<br>(13871 to 25211)    | 5.72<br>(4 to 7.27)             | -1.02<br>(-1.28 to -0.77)   |
| Eastern Sub-Saharan            | 1878<br>(1470 to 2330)       | 2.71<br>(2.13 to 3.34)          | 4653<br>(3528 to 5753)       | 3.13<br>(2.4 to 3.85)           | 0.5<br>(0.44 to 0.56)       |

## Africa

|                  |                  |                |                  |                |                  |
|------------------|------------------|----------------|------------------|----------------|------------------|
| High-income Asia | 10886            | 5.68           | 25262            | 5.04           | -0.42            |
| Pacific          | (7945 to 13314)  | (4.16 to 6.92) | (18176 to 31456) | (3.64 to 6.2)  | (-0.51 to -0.33) |
| High-income      | 23253            | 6.48           | 30355            | 4.75           | -1.22            |
| North America    | (16965 to 28708) | (4.73 to 7.98) | (21657 to 37839) | (3.43 to 5.9)  | (-1.31 to -1.12) |
| North Africa and | 4572             | 2.89           | 13092            | 3.3            | 0.6              |
| Middle East      | (3322 to 5752)   | (2.11 to 3.63) | (9312 to 16064)  | (2.37 to 4.05) | (0.43 to 0.77)   |
| Oceania          | 79               | 3.01           | 211              | 3.39           | 0.4              |
|                  | (58 to 99)       | (2.22 to 3.78) | (155 to 275)     | (2.55 to 4.34) | (0.33 to 0.46)   |
| South Asia       | 9650             | 1.96           | 31191            | 2.44           | 0.64             |
|                  | (7685 to 11679)  | (1.56 to 2.36) | (23748 to 38373) | (1.87 to 3)    | (0.53 to 0.76)   |
| Southeast Asia   | 9939             | 4.16           | 32376            | 5.7            | 1                |
|                  | (8112 to 11649)  | (3.41 to 4.86) | (24769 to 40353) | (4.37 to 7.08) | (0.94 to 1.06)   |
| Southern Latin   | 3569             | 8.07           | 6818             | 8.07           | 0.03             |
| America          | (2757 to 4195)   | (6.23 to 9.47) | (5126 to 8144)   | (6.06 to 9.62) | (-0.04 to 0.1)   |
| Southern         | 944              | 3.75           | 2193             | 4.26           | 0.45             |
| Sub-Saharan      | (734 to 1196)    | (2.89 to 4.8)  | (1719 to 2668)   | (3.35 to 5.17) | (0.23 to 0.66)   |
| Africa           |                  |                |                  |                |                  |
| Tropical Latin   | 2908             | 3.49           | 8984             | 3.78           | 0.31             |
| America          | (2216 to 3505)   | (2.67 to 4.21) | (6693 to 11034)  | (2.81 to 4.64) | (0.16 to 0.47)   |
| Western Europe   | 43391            | 7.38           | 56341            | 5.67           | -1.11            |
|                  | (31731 to 52971) | (5.41 to 9)    | (40795 to 69277) | (4.09 to 6.95) | (-1.26 to -0.97) |
| Western          | 2092             | 2.69           | 5181             | 3.2            | 0.77             |
| Sub-Saharan      | (1606 to 2643)   | (2.08 to 3.38) | (4002 to 6337)   | (2.49 to 3.88) | (0.68 to 0.86)   |
| Africa           |                  |                |                  |                |                  |

**Abbreviations:** SDI, sociodemographic index; ASDR, age-standardized death rate; EAPC, estimated annual percentage change; UI, uncertainty interval; CI, confidence interval.

**Supplementary Table S4.** The death cases and age-standardized death rates of CRC attributable to all dietary risk factors in 204 countries and territories, and their temporal trends from 1990 to 2019.

| Countries   | Risk factors                | 1990                         |                              | 2019                         |                              | 1990-2019                 |
|-------------|-----------------------------|------------------------------|------------------------------|------------------------------|------------------------------|---------------------------|
|             |                             | Number of deaths<br>(95% UI) | ASDR per 100,000<br>(95% UI) | Number of deaths<br>(95% UI) | ASDR per 100,000<br>(95% UI) | EAPC of ASDR<br>(95% CI)  |
| Afghanistan | All dietary risks           | 226<br>(133 to 344)          | 3.33<br>(2.06 to 4.96)       | 444<br>(283 to 623)          | 3.63<br>(2.53 to 4.93)       | 0.43<br>(0.29 to 0.57)    |
| Afghanistan | Diet low in milk            | 113<br>(58 to 181)           | 1.67<br>(0.87 to 2.6)        | 218<br>(111 to 324)          | 1.78<br>(0.92 to 2.57)       | 0.43<br>(0.22 to 0.64)    |
| Afghanistan | Diet low in fiber           | 10<br>(3 to 26)              | 0.16<br>(0.05 to 0.39)       | 37<br>(13 to 75)             | 0.3<br>(0.11 to 0.58)        | 1.74<br>(1.25 to 2.24)    |
| Afghanistan | Diet low in calcium         | 119<br>(68 to 189)           | 1.77<br>(1.07 to 2.75)       | 232<br>(142 to 326)          | 1.92<br>(1.29 to 2.65)       | 0.34<br>(0.24 to 0.45)    |
| Afghanistan | Diet high in red meat       | 16<br>(1 to 50)              | 0.23<br>(0.02 to 0.72)       | 25<br>(2 to 76)              | 0.2<br>(0.02 to 0.58)        | -0.3<br>(-0.66 to 0.05)   |
| Afghanistan | Diet high in processed meat | 4<br>(1 to 9)                | 0.06<br>(0.02 to 0.13)       | 8<br>(2 to 16)               | 0.06<br>(0.02 to 0.12)       | 0.51<br>(0.2 to 0.83)     |
| Afghanistan | Diet low in whole grains    | 113<br>(58 to 181)           | 1.67<br>(0.87 to 2.6)        | 218<br>(111 to 324)          | 1.78<br>(0.92 to 2.57)       | 0.43<br>(0.22 to 0.64)    |
| Albania     | All dietary risks           | 59<br>(43 to 72)             | 3.04<br>(2.23 to 3.71)       | 127<br>(82 to 180)           | 3.01<br>(1.94 to 4.27)       | 0.28<br>(0.03 to 0.54)    |
| Albania     | Diet low in milk            | 36<br>(18 to 45)             | 1.84<br>(0.92 to 2.29)       | 83<br>(40 to 119)            | 1.95<br>(0.95 to 2.8)        | 0.61<br>(0.34 to 0.88)    |
| Albania     | Diet low in fiber           | 3<br>(1 to 7)                | 0.18<br>(0.06 to 0.39)       | 4<br>(1 to 10)               | 0.1<br>(0.03 to 0.23)        | -2.67<br>(-2.98 to -2.35) |
| Albania     | Diet low in calcium         | 13<br>(6 to 22)              | 0.66<br>(0.33 to 1.16)       | 11<br>(5 to 19)              | 0.26<br>(0.12 to 0.45)       | -3.45<br>(-3.74 to -3.17) |
| Albania     | Diet high in red meat       | 5<br>(0 to 12)               | 0.23<br>(0.02 to 0.63)       | 18<br>(3 to 41)              | 0.42<br>(0.07 to 0.98)       | 2.88<br>(2.52 to 3.24)    |
| Albania     | Diet high in processed meat | 11<br>(4 to 18)              | 0.57<br>(0.19 to 0.89)       | 27<br>(9 to 46)              | 0.64<br>(0.22 to 1.08)       | 0.82<br>(0.57 to 1.07)    |
| Albania     | Diet low in whole grains    | 36<br>(18 to 45)             | 1.84<br>(0.92 to 2.29)       | 83<br>(40 to 119)            | 1.95<br>(0.95 to 2.8)        | 0.61<br>(0.34 to 0.88)    |
| Algeria     | All dietary risks           | 268<br>(190 to 345)          | 2.67<br>(1.92 to 3.39)       | 745<br>(481 to 1001)         | 2.54<br>(1.63 to 3.39)       | -0.26<br>(-0.29 to -0.22) |
| Algeria     | Diet low in milk            | 149<br>(68 to 201)           | 1.46<br>(0.67 to 1.94)       | 475<br>(209 to 643)          | 1.6<br>(0.71 to 2.17)        | 0.39<br>(0.34 to 0.43)    |
| Algeria     | Diet low in fiber           | 14<br>(5 to 32)              | 0.15<br>(0.05 to 0.32)       | 17<br>(7 to 41)              | 0.06<br>(0.02 to 0.15)       | -3.87<br>(-4.24 to -3.49) |

| Countries      | Risk factors                | 1990                         |                              | 2019                         |                              | 1990-2019                 |
|----------------|-----------------------------|------------------------------|------------------------------|------------------------------|------------------------------|---------------------------|
|                |                             | Number of deaths<br>(95% UI) | ASDR per 100,000<br>(95% UI) | Number of deaths<br>(95% UI) | ASDR per 100,000<br>(95% UI) | EAPC of ASDR<br>(95% CI)  |
| Algeria        | Diet low in calcium         | 120<br>(81 to 166)           | 1.23<br>(0.86 to 1.68)       | 255<br>(144 to 409)          | 0.9<br>(0.52 to 1.41)        | -1.47<br>(-1.6 to -1.33)  |
| Algeria        | Diet high in red meat       | 15<br>(2 to 40)              | 0.14<br>(0.01 to 0.38)       | 52<br>(5 to 145)             | 0.17<br>(0.02 to 0.48)       | 0.83<br>(0.76 to 0.89)    |
| Algeria        | Diet high in processed meat | 7<br>(2 to 12)               | 0.06<br>(0.02 to 0.11)       | 23<br>(5 to 45)              | 0.08<br>(0.02 to 0.14)       | 0.97<br>(0.87 to 1.06)    |
| Algeria        | Diet low in whole grains    | 149<br>(68 to 201)           | 1.46<br>(0.67 to 1.94)       | 475<br>(209 to 643)          | 1.6<br>(0.71 to 2.17)        | 0.39<br>(0.34 to 0.43)    |
| American Samoa | All dietary risks           | 1<br>(1 to 1)                | 5.72<br>(4.1 to 7.18)        | 3<br>(2 to 3)                | 5.87<br>(4.33 to 7.4)        | 0.16<br>(0.03 to 0.29)    |
| American Samoa | Diet low in milk            | 1<br>(0 to 1)                | 2.63<br>(1.01 to 3.54)       | 1<br>(0 to 2)                | 2.69<br>(1.01 to 3.69)       | 0.17<br>(0.04 to 0.3)     |
| American Samoa | Diet low in fiber           | 0<br>(0 to 0)                | 0.04<br>(0.03 to 0.06)       | 0<br>(0 to 0)                | 0.04<br>(0.03 to 0.06)       | -0.39<br>(-0.55 to -0.23) |
| American Samoa | Diet low in calcium         | 1<br>(0 to 1)                | 3.09<br>(2.22 to 4.08)       | 1<br>(1 to 2)                | 3.24<br>(2.4 to 4.26)        | 0.19<br>(0.07 to 0.32)    |
| American Samoa | Diet high in red meat       | 0<br>(0 to 0)                | 0.55<br>(0.06 to 1.36)       | 0<br>(0 to 1)                | 0.52<br>(0.05 to 1.36)       | -0.09<br>(-0.23 to 0.05)  |
| American Samoa | Diet high in processed meat | 0<br>(0 to 0)                | 0.15<br>(0.04 to 0.27)       | 0<br>(0 to 0)                | 0.15<br>(0.04 to 0.28)       | 0.29<br>(0.16 to 0.43)    |
| American Samoa | Diet low in whole grains    | 1<br>(0 to 1)                | 2.63<br>(1.01 to 3.54)       | 1<br>(0 to 2)                | 2.69<br>(1.01 to 3.69)       | 0.17<br>(0.04 to 0.3)     |
| Andorra        | All dietary risks           | 4<br>(3 to 6)                | 8.9<br>(5.97 to 12.41)       | 10<br>(7 to 14)              | 7.09<br>(4.61 to 9.65)       | -0.83<br>(-0.88 to -0.78) |
| Andorra        | Diet low in milk            | 2<br>(1 to 4)                | 4.76<br>(1.73 to 7.06)       | 6<br>(2 to 8)                | 3.83<br>(1.38 to 5.37)       | -0.79<br>(-0.85 to -0.74) |
| Andorra        | Diet low in fiber           | 0<br>(0 to 0)                | 0.39<br>(0.13 to 0.92)       | 0<br>(0 to 1)                | 0.32<br>(0.1 to 0.72)        | -0.93<br>(-1.08 to -0.78) |
| Andorra        | Diet low in calcium         | 0<br>(0 to 1)                | 1<br>(0.44 to 1.79)          | 1<br>(0 to 2)                | 0.79<br>(0.34 to 1.39)       | -1.05<br>(-1.18 to -0.91) |
| Andorra        | Diet high in red meat       | 1<br>(0 to 2)                | 2.2<br>(0.69 to 4.12)        | 2<br>(1 to 5)                | 1.72<br>(0.45 to 3.26)       | -0.86<br>(-0.93 to -0.79) |
| Andorra        | Diet high in processed meat | 1<br>(0 to 1)                | 1.68<br>(0.52 to 2.84)       | 2<br>(1 to 3)                | 1.35<br>(0.41 to 2.2)        | -0.77<br>(-0.83 to -0.72) |

| Countries           | Risk factors                | 1990                         |                              | 2019                         |                              | 1990-2019                 |
|---------------------|-----------------------------|------------------------------|------------------------------|------------------------------|------------------------------|---------------------------|
|                     |                             | Number of deaths<br>(95% UI) | ASDR per 100,000<br>(95% UI) | Number of deaths<br>(95% UI) | ASDR per 100,000<br>(95% UI) | EAPC of ASDR<br>(95% CI)  |
| Andorra             | Diet low in whole grains    | 2<br>(1 to 4)                | 4.76<br>(1.73 to 7.06)       | 6<br>(2 to 8)                | 3.83<br>(1.38 to 5.37)       | -0.79<br>(-0.85 to -0.74) |
| Angola              | All dietary risks           | 118<br>(81 to 175)           | 3.36<br>(2.29 to 4.79)       | 363<br>(260 to 478)          | 3.72<br>(2.74 to 4.78)       | 0.35<br>(0.2 to 0.5)      |
| Angola              | Diet low in milk            | 47<br>(17 to 73)             | 1.32<br>(0.5 to 1.99)        | 146<br>(54 to 205)           | 1.49<br>(0.57 to 2.11)       | 0.45<br>(0.28 to 0.61)    |
| Angola              | Diet low in fiber           | 7<br>(2 to 15)               | 0.2<br>(0.06 to 0.45)        | 6<br>(3 to 15)               | 0.07<br>(0.03 to 0.17)       | -4.78<br>(-5.23 to -4.32) |
| Angola              | Diet low in calcium         | 74<br>(50 to 111)            | 2.11<br>(1.43 to 3.09)       | 224<br>(161 to 298)          | 2.32<br>(1.73 to 3.02)       | 0.29<br>(0.16 to 0.42)    |
| Angola              | Diet high in red meat       | 6<br>(1 to 18)               | 0.16<br>(0.02 to 0.47)       | 23<br>(2 to 63)              | 0.22<br>(0.02 to 0.61)       | 1.45<br>(1.22 to 1.67)    |
| Angola              | Diet high in processed meat | 4<br>(1 to 9)                | 0.1<br>(0.02 to 0.22)        | 15<br>(2 to 31)              | 0.14<br>(0.02 to 0.28)       | 1.41<br>(1.21 to 1.6)     |
| Angola              | Diet low in whole grains    | 47<br>(17 to 73)             | 1.32<br>(0.5 to 1.99)        | 146<br>(54 to 205)           | 1.49<br>(0.57 to 2.11)       | 0.45<br>(0.28 to 0.61)    |
| Antigua and Barbuda | All dietary risks           | 3<br>(2 to 3)                | 4.55<br>(3.44 to 5.43)       | 5<br>(4 to 7)                | 5.8<br>(4.17 to 7.19)        | 0.71<br>(0.57 to 0.84)    |
| Antigua and Barbuda | Diet low in milk            | 1<br>(1 to 2)                | 2.49<br>(1.22 to 3.15)       | 3<br>(1 to 4)                | 3.22<br>(1.45 to 4.17)       | 0.76<br>(0.61 to 0.9)     |
| Antigua and Barbuda | Diet low in fiber           | 0<br>(0 to 1)                | 0.85<br>(0.43 to 1.22)       | 1<br>(0 to 1)                | 0.9<br>(0.4 to 1.42)         | -0.08<br>(-0.22 to 0.06)  |
| Antigua and Barbuda | Diet low in calcium         | 1<br>(1 to 1)                | 1.53<br>(0.97 to 2.24)       | 2<br>(1 to 3)                | 1.99<br>(1.21 to 2.9)        | 0.79<br>(0.64 to 0.93)    |
| Antigua and Barbuda | Diet high in red meat       | 0<br>(0 to 0)                | 0.3<br>(0.03 to 0.8)         | 0<br>(0 to 1)                | 0.39<br>(0.04 to 1.08)       | 0.9<br>(0.73 to 1.08)     |
| Antigua and Barbuda | Diet high in processed meat | 0<br>(0 to 0)                | 0.12<br>(0.03 to 0.21)       | 0<br>(0 to 0)                | 0.16<br>(0.04 to 0.3)        | 1.12<br>(0.96 to 1.27)    |
| Antigua and Barbuda | Diet low in whole grains    | 1<br>(1 to 2)                | 2.49<br>(1.22 to 3.15)       | 3<br>(1 to 4)                | 3.22<br>(1.45 to 4.17)       | 0.76<br>(0.61 to 0.9)     |
| Argentina           | All dietary risks           | 2661<br>(2034 to 3139)       | 8.54<br>(6.55 to 10.08)      | 4879<br>(3646 to 5847)       | 8.93<br>(6.67 to 10.7)       | 0.14<br>(0.03 to 0.25)    |
| Argentina           | Diet low in milk            | 1278<br>(546 to 1613)        | 4.11<br>(1.75 to 5.19)       | 2218<br>(818 to 2874)        | 4.06<br>(1.5 to 5.25)        | -0.12<br>(-0.24 to 0)     |
| Argentina           | Diet low in fiber           | 207<br>(71 to 392)           | 0.68<br>(0.24 to 1.28)       | 388<br>(139 to 738)          | 0.71<br>(0.25 to 1.35)       | 0.49<br>(0.32 to 0.66)    |

| Countries | Risk factors                | 1990                            |                                 | 2019                            |                                 | 1990-2019                 |
|-----------|-----------------------------|---------------------------------|---------------------------------|---------------------------------|---------------------------------|---------------------------|
|           |                             | Number of<br>deaths<br>(95% UI) | ASDR per<br>100,000<br>(95% UI) | Number of<br>deaths<br>(95% UI) | ASDR per<br>100,000<br>(95% UI) | EAPC of ASDR<br>(95% CI)  |
| Argentina | Diet low in calcium         | 765<br>(472 to 1137)            | 2.48<br>(1.54 to 3.67)          | 1297<br>(734 to 2077)           | 2.36<br>(1.34 to 3.79)          | -0.04<br>(-0.19 to 0.12)  |
| Argentina | Diet high in red meat       | 742<br>(324 to 1129)            | 2.35<br>(1.02 to 3.58)          | 1417<br>(605 to 2160)           | 2.61<br>(1.12 to 3.97)          | 0.32<br>(0.21 to 0.42)    |
| Argentina | Diet high in processed meat | 175<br>(20 to 297)              | 0.56<br>(0.07 to 0.95)          | 431<br>(64 to 713)              | 0.8<br>(0.12 to 1.32)           | 1.24<br>(1.14 to 1.34)    |
| Argentina | Diet low in whole grains    | 1278<br>(546 to 1613)           | 4.11<br>(1.75 to 5.19)          | 2218<br>(818 to 2874)           | 4.06<br>(1.5 to 5.25)           | -0.12<br>(-0.24 to 0)     |
| Armenia   | All dietary risks           | 135<br>(98 to 161)              | 5.1<br>(3.69 to 6.11)           | 189<br>(128 to 245)             | 4.61<br>(3.14 to 5.96)          | -0.59<br>(-0.69 to -0.48) |
| Armenia   | Diet low in milk            | 79<br>(39 to 98)                | 2.98<br>(1.46 to 3.69)          | 126<br>(62 to 163)              | 3.06<br>(1.5 to 3.98)           | 0.11<br>(-0.01 to 0.23)   |
| Armenia   | Diet low in fiber           | 8<br>(3 to 18)                  | 0.33<br>(0.11 to 0.7)           | 8<br>(3 to 20)                  | 0.21<br>(0.07 to 0.5)           | -2.64<br>(-3.1 to -2.18)  |
| Armenia   | Diet low in calcium         | 48<br>(30 to 69)                | 1.83<br>(1.18 to 2.62)          | 41<br>(21 to 71)                | 1.02<br>(0.52 to 1.75)          | -2.91<br>(-3.21 to -2.61) |
| Armenia   | Diet high in red meat       | 10<br>(1 to 29)                 | 0.39<br>(0.03 to 1.06)          | 20<br>(2 to 51)                 | 0.49<br>(0.05 to 1.25)          | 1.14<br>(0.86 to 1.43)    |
| Armenia   | Diet high in processed meat | 9<br>(1 to 15)                  | 0.31<br>(0.04 to 0.55)          | 14<br>(2 to 26)                 | 0.35<br>(0.04 to 0.63)          | 0.58<br>(0.36 to 0.8)     |
| Armenia   | Diet low in whole grains    | 79<br>(39 to 98)                | 2.98<br>(1.46 to 3.69)          | 126<br>(62 to 163)              | 3.06<br>(1.5 to 3.98)           | 0.11<br>(-0.01 to 0.23)   |
| Australia | All dietary risks           | 1562<br>(1171 to 1900)          | 8.12<br>(6.09 to 9.86)          | 2320<br>(1707 to 2869)          | 5.35<br>(3.99 to 6.58)          | -1.8<br>(-1.94 to -1.66)  |
| Australia | Diet low in milk            | 659<br>(249 to 885)             | 3.43<br>(1.29 to 4.61)          | 1023<br>(382 to 1379)           | 2.36<br>(0.88 to 3.16)          | -1.67<br>(-1.82 to -1.53) |
| Australia | Diet low in fiber           | 134<br>(48 to 258)              | 0.69<br>(0.25 to 1.33)          | 153<br>(56 to 295)              | 0.35<br>(0.13 to 0.68)          | -2.92<br>(-3.16 to -2.68) |
| Australia | Diet low in calcium         | 294<br>(142 to 519)             | 1.53<br>(0.74 to 2.71)          | 429<br>(206 to 764)             | 0.97<br>(0.46 to 1.73)          | -2.03<br>(-2.2 to -1.86)  |
| Australia | Diet high in red meat       | 506<br>(223 to 762)             | 2.62<br>(1.16 to 3.97)          | 722<br>(300 to 1124)            | 1.69<br>(0.72 to 2.61)          | -1.81<br>(-1.99 to -1.64) |
| Australia | Diet high in processed meat | 224<br>(56 to 350)              | 1.17<br>(0.29 to 1.83)          | 364<br>(98 to 565)              | 0.85<br>(0.23 to 1.31)          | -1.32<br>(-1.45 to -1.18) |
| Australia | Diet low in whole grains    | 659<br>(249 to 885)             | 3.43<br>(1.29 to 4.61)          | 1023<br>(382 to 1379)           | 2.36<br>(0.88 to 3.16)          | -1.67<br>(-1.82 to -1.53) |

| Countries  | Risk factors                   | 1990                            |                                 | 2019                            |                                 | 1990-2019                 |
|------------|--------------------------------|---------------------------------|---------------------------------|---------------------------------|---------------------------------|---------------------------|
|            |                                | Number of<br>deaths<br>(95% UI) | ASDR per<br>100,000<br>(95% UI) | Number of<br>deaths<br>(95% UI) | ASDR per<br>100,000<br>(95% UI) | EAPC of ASDR<br>(95% CI)  |
| Austria    | All dietary risks              | 1031<br>(754 to 1290)           | 8.58<br>(6.28 to 10.7)          | 787<br>(560 to 992)             | 4.11<br>(2.91 to 5.16)          | -2.93<br>(-3.07 to -2.8)  |
| Austria    | Diet low in milk               | 472<br>(176 to 637)             | 3.92<br>(1.47 to 5.31)          | 390<br>(145 to 526)             | 2.03<br>(0.76 to 2.72)          | -2.65<br>(-2.77 to -2.52) |
| Austria    | Diet low in fiber              | 63<br>(21 to 140)               | 0.52<br>(0.18 to 1.13)          | 34<br>(12 to 80)                | 0.17<br>(0.06 to 0.4)           | -4.26<br>(-4.51 to -4.01) |
| Austria    | Diet low in<br>calcium         | 202<br>(98 to 355)              | 1.64<br>(0.79 to 2.9)           | 145<br>(65 to 262)              | 0.74<br>(0.33 to 1.33)          | -3.03<br>(-3.13 to -2.93) |
| Austria    | Diet high in red<br>meat       | 286<br>(91 to 472)              | 2.42<br>(0.79 to 3.95)          | 182<br>(48 to 329)              | 0.97<br>(0.27 to 1.73)          | -3.71<br>(-3.98 to -3.44) |
| Austria    | Diet high in<br>processed meat | 154<br>(29 to 243)              | 1.29<br>(0.25 to 2.03)          | 138<br>(34 to 215)              | 0.73<br>(0.19 to 1.13)          | -2.28<br>(-2.44 to -2.12) |
| Austria    | Diet low in<br>whole grains    | 472<br>(176 to 637)             | 3.92<br>(1.47 to 5.31)          | 390<br>(145 to 526)             | 2.03<br>(0.76 to 2.72)          | -2.65<br>(-2.77 to -2.52) |
| Azerbaijan | All dietary risks              | 210<br>(161 to 248)             | 4.15<br>(3.19 to 4.88)          | 368<br>(255 to 482)             | 4.24<br>(2.9 to 5.59)           | 0.41<br>(0.06 to 0.76)    |
| Azerbaijan | Diet low in milk               | 113<br>(56 to 140)              | 2.23<br>(1.12 to 2.77)          | 227<br>(110 to 303)             | 2.6<br>(1.27 to 3.46)           | 1.15<br>(0.66 to 1.64)    |
| Azerbaijan | Diet low in fiber              | 12<br>(4 to 26)                 | 0.24<br>(0.08 to 0.52)          | 10<br>(3 to 24)                 | 0.12<br>(0.04 to 0.31)          | -3.48<br>(-3.87 to -3.08) |
| Azerbaijan | Diet low in<br>calcium         | 88<br>(62 to 117)               | 1.75<br>(1.25 to 2.32)          | 107<br>(58 to 171)              | 1.28<br>(0.71 to 2.02)          | -1.3<br>(-1.43 to -1.18)  |
| Azerbaijan | Diet high in red<br>meat       | 13<br>(1 to 35)                 | 0.25<br>(0.02 to 0.68)          | 31<br>(3 to 86)                 | 0.35<br>(0.03 to 0.96)          | 2.15<br>(1.39 to 2.92)    |
| Azerbaijan | Diet high in<br>processed meat | 19<br>(3 to 31)                 | 0.36<br>(0.06 to 0.61)          | 42<br>(8 to 73)                 | 0.46<br>(0.08 to 0.81)          | 1.67<br>(1.02 to 2.32)    |
| Azerbaijan | Diet low in<br>whole grains    | 113<br>(56 to 140)              | 2.23<br>(1.12 to 2.77)          | 227<br>(110 to 303)             | 2.6<br>(1.27 to 3.46)           | 1.15<br>(0.66 to 1.64)    |
| Bahamas    | All dietary risks              | 9<br>(6 to 11)                  | 5.84<br>(4.2 to 7.19)           | 23<br>(16 to 30)                | 6.26<br>(4.42 to 8.23)          | 0.45<br>(0.36 to 0.55)    |
| Bahamas    | Diet low in milk               | 4<br>(2 to 6)                   | 2.99<br>(1.15 to 3.86)          | 12<br>(5 to 17)                 | 3.37<br>(1.35 to 4.58)          | 0.67<br>(0.57 to 0.78)    |
| Bahamas    | Diet low in fiber              | 1<br>(0 to 2)                   | 0.63<br>(0.23 to 1.13)          | 3<br>(1 to 5)                   | 0.73<br>(0.27 to 1.28)          | 0.55<br>(0.41 to 0.68)    |
| Bahamas    | Diet low in<br>calcium         | 3<br>(2 to 5)                   | 2.22<br>(1.45 to 3.19)          | 8<br>(5 to 12)                  | 2.16<br>(1.31 to 3.36)          | 0.02<br>(-0.1 to 0.13)    |

| Countries  | Risk factors                | 1990                         |                              | 2019                         |                              | 1990-2019                 |
|------------|-----------------------------|------------------------------|------------------------------|------------------------------|------------------------------|---------------------------|
|            |                             | Number of deaths<br>(95% UI) | ASDR per 100,000<br>(95% UI) | Number of deaths<br>(95% UI) | ASDR per 100,000<br>(95% UI) | EAPC of ASDR<br>(95% CI)  |
| Bahamas    | Diet high in red meat       | 1<br>(0 to 2)                | 0.63<br>(0.07 to 1.55)       | 3<br>(0 to 6)                | 0.67<br>(0.08 to 1.72)       | 0.61<br>(0.48 to 0.73)    |
| Bahamas    | Diet high in processed meat | 0<br>(0 to 1)                | 0.19<br>(0.04 to 0.34)       | 1<br>(0 to 1)                | 0.2<br>(0.04 to 0.38)        | 0.5<br>(0.4 to 0.61)      |
| Bahamas    | Diet low in whole grains    | 4<br>(2 to 6)                | 2.99<br>(1.15 to 3.86)       | 12<br>(5 to 17)              | 3.37<br>(1.35 to 4.58)       | 0.67<br>(0.57 to 0.78)    |
| Bahrain    | All dietary risks           | 6<br>(4 to 8)                | 3.96<br>(2.69 to 5.08)       | 25<br>(15 to 34)             | 3.43<br>(2.16 to 4.6)        | -0.66<br>(-0.93 to -0.39) |
| Bahrain    | Diet low in milk            | 4<br>(2 to 5)                | 2.38<br>(1.05 to 3.18)       | 15<br>(6 to 22)              | 2.11<br>(0.83 to 2.95)       | -0.56<br>(-0.84 to -0.28) |
| Bahrain    | Diet low in fiber           | 0<br>(0 to 0)                | 0.07<br>(0.03 to 0.15)       | 0<br>(0 to 1)                | 0.05<br>(0.02 to 0.1)        | -1.2<br>(-1.44 to -0.96)  |
| Bahrain    | Diet low in calcium         | 2<br>(1 to 3)                | 1.51<br>(0.91 to 2.26)       | 8<br>(5 to 14)               | 1.21<br>(0.7 to 1.96)        | -0.94<br>(-1.2 to -0.68)  |
| Bahrain    | Diet high in red meat       | 1<br>(0 to 1)                | 0.33<br>(0.03 to 0.88)       | 2<br>(0 to 6)                | 0.29<br>(0.03 to 0.81)       | -0.54<br>(-0.81 to -0.26) |
| Bahrain    | Diet high in processed meat | 0<br>(0 to 0)                | 0.12<br>(0.03 to 0.22)       | 1<br>(0 to 2)                | 0.12<br>(0.03 to 0.23)       | -0.33<br>(-0.62 to -0.04) |
| Bahrain    | Diet low in whole grains    | 4<br>(2 to 5)                | 2.38<br>(1.05 to 3.18)       | 15<br>(6 to 22)              | 2.11<br>(0.83 to 2.95)       | -0.56<br>(-0.84 to -0.28) |
| Bangladesh | All dietary risks           | 910<br>(623 to 1232)         | 2.08<br>(1.4 to 2.83)        | 2568<br>(1730 to 3797)       | 2.11<br>(1.42 to 3.12)       | -0.05<br>(-0.2 to 0.09)   |
| Bangladesh | Diet low in milk            | 244<br>(95 to 395)           | 0.56<br>(0.22 to 0.9)        | 691<br>(242 to 1204)         | 0.57<br>(0.2 to 0.98)        | -0.02<br>(-0.17 to 0.12)  |
| Bangladesh | Diet low in fiber           | 199<br>(105 to 303)          | 0.46<br>(0.24 to 0.7)        | 493<br>(235 to 824)          | 0.41<br>(0.2 to 0.68)        | -0.57<br>(-0.72 to -0.41) |
| Bangladesh | Diet low in calcium         | 574<br>(380 to 815)          | 1.31<br>(0.86 to 1.88)       | 1616<br>(1051 to 2412)       | 1.33<br>(0.87 to 1.99)       | -0.06<br>(-0.21 to 0.09)  |
| Bangladesh | Diet high in red meat       | 15<br>(4 to 34)              | 0.03<br>(0.01 to 0.08)       | 51<br>(11 to 131)            | 0.04<br>(0.01 to 0.11)       | 0.71<br>(0.57 to 0.84)    |
| Bangladesh | Diet high in processed meat | 50<br>(6 to 94)              | 0.11<br>(0.01 to 0.21)       | 167<br>(21 to 344)           | 0.13<br>(0.02 to 0.28)       | 0.69<br>(0.56 to 0.82)    |
| Bangladesh | Diet low in whole grains    | 244<br>(95 to 395)           | 0.56<br>(0.22 to 0.9)        | 691<br>(242 to 1204)         | 0.57<br>(0.2 to 0.98)        | -0.02<br>(-0.17 to 0.12)  |
| Barbados   | All dietary risks           | 17<br>(12 to 21)             | 5.68<br>(4.05 to 7.11)       | 37<br>(25 to 48)             | 7.54<br>(5.1 to 9.76)        | 0.89<br>(0.69 to 1.09)    |



| Countries | Risk factors                | 1990                         |                              | 2019                         |                              | 1990-2019                 |
|-----------|-----------------------------|------------------------------|------------------------------|------------------------------|------------------------------|---------------------------|
|           |                             | Number of deaths<br>(95% UI) | ASDR per 100,000<br>(95% UI) | Number of deaths<br>(95% UI) | ASDR per 100,000<br>(95% UI) | EAPC of ASDR<br>(95% CI)  |
| Barbados  | Diet low in milk            | 9<br>(3 to 11)               | 2.86<br>(1.08 to 3.69)       | 19<br>(7 to 26)              | 3.92<br>(1.47 to 5.36)       | 1.04<br>(0.83 to 1.26)    |
| Barbados  | Diet low in fiber           | 2<br>(1 to 3)                | 0.59<br>(0.21 to 1.07)       | 3<br>(1 to 7)                | 0.68<br>(0.24 to 1.33)       | 0.5<br>(0.38 to 0.62)     |
| Barbados  | Diet low in calcium         | 7<br>(4 to 10)               | 2.18<br>(1.37 to 3.19)       | 14<br>(9 to 21)              | 2.93<br>(1.82 to 4.34)       | 0.79<br>(0.55 to 1.04)    |
| Barbados  | Diet high in red meat       | 2<br>(0 to 5)                | 0.61<br>(0.06 to 1.52)       | 3<br>(0 to 9)                | 0.67<br>(0.06 to 1.87)       | 0.37<br>(0.25 to 0.5)     |
| Barbados  | Diet high in processed meat | 1<br>(0 to 1)                | 0.22<br>(0.04 to 0.39)       | 1<br>(0 to 3)                | 0.29<br>(0.05 to 0.54)       | 1.05<br>(0.87 to 1.23)    |
| Barbados  | Diet low in whole grains    | 9<br>(3 to 11)               | 2.86<br>(1.08 to 3.69)       | 19<br>(7 to 26)              | 3.92<br>(1.47 to 5.36)       | 1.04<br>(0.83 to 1.26)    |
| Belarus   | All dietary risks           | 797<br>(590 to 956)          | 6.2<br>(4.59 to 7.44)        | 911<br>(628 to 1224)         | 5.67<br>(3.9 to 7.61)        | -1.11<br>(-1.41 to -0.82) |
| Belarus   | Diet low in milk            | 481<br>(237 to 598)          | 3.74<br>(1.84 to 4.64)       | 527<br>(221 to 732)          | 3.28<br>(1.38 to 4.55)       | -1.31<br>(-1.63 to -1)    |
| Belarus   | Diet low in fiber           | 7<br>(5 to 13)               | 0.06<br>(0.04 to 0.11)       | 12<br>(6 to 27)              | 0.07<br>(0.04 to 0.17)       | 0.05<br>(-0.69 to 0.8)    |
| Belarus   | Diet low in calcium         | 125<br>(58 to 220)           | 0.98<br>(0.45 to 1.73)       | 148<br>(68 to 276)           | 0.92<br>(0.42 to 1.71)       | -1.17<br>(-1.71 to -0.62) |
| Belarus   | Diet high in red meat       | 164<br>(44 to 290)           | 1.27<br>(0.34 to 2.25)       | 199<br>(55 to 382)           | 1.25<br>(0.35 to 2.4)        | -0.54<br>(-1.01 to -0.07) |
| Belarus   | Diet high in processed meat | 134<br>(41 to 202)           | 1.04<br>(0.32 to 1.56)       | 146<br>(42 to 241)           | 0.91<br>(0.26 to 1.5)        | -1.26<br>(-1.57 to -0.95) |
| Belarus   | Diet low in whole grains    | 481<br>(237 to 598)          | 3.74<br>(1.84 to 4.64)       | 527<br>(221 to 732)          | 3.28<br>(1.38 to 4.55)       | -1.31<br>(-1.63 to -1)    |
| Belgium   | All dietary risks           | 1226<br>(864 to 1542)        | 7.86<br>(5.55 to 9.9)        | 1382<br>(976 to 1713)        | 5.5<br>(3.91 to 6.82)        | -1.29<br>(-1.39 to -1.2)  |
| Belgium   | Diet low in milk            | 640<br>(238 to 837)          | 4.1<br>(1.53 to 5.36)        | 710<br>(263 to 928)          | 2.81<br>(1.04 to 3.66)       | -1.41<br>(-1.53 to -1.28) |
| Belgium   | Diet low in fiber           | 97<br>(34 to 198)            | 0.62<br>(0.21 to 1.26)       | 93<br>(32 to 198)            | 0.35<br>(0.12 to 0.75)       | -1.9<br>(-2.04 to -1.76)  |
| Belgium   | Diet low in calcium         | 232<br>(111 to 405)          | 1.46<br>(0.7 to 2.57)        | 209<br>(97 to 364)           | 0.8<br>(0.37 to 1.39)        | -2.04<br>(-2.31 to -1.76) |
| Belgium   | Diet high in red meat       | 191<br>(35 to 415)           | 1.25<br>(0.23 to 2.7)        | 298<br>(83 to 540)           | 1.25<br>(0.36 to 2.22)       | 0<br>(-0.23 to 0.24)      |

| Countries | Risk factors                | 1990                         |                              | 2019                         |                              | 1990-2019                 |
|-----------|-----------------------------|------------------------------|------------------------------|------------------------------|------------------------------|---------------------------|
|           |                             | Number of deaths<br>(95% UI) | ASDR per 100,000<br>(95% UI) | Number of deaths<br>(95% UI) | ASDR per 100,000<br>(95% UI) | EAPC of ASDR<br>(95% CI)  |
| Belgium   | Diet high in processed meat | 229<br>(66 to 346)           | 1.48<br>(0.44 to 2.23)       | 265<br>(82 to 409)           | 1.07<br>(0.33 to 1.63)       | -1.25<br>(-1.33 to -1.16) |
| Belgium   | Diet low in whole grains    | 640<br>(238 to 837)          | 4.1<br>(1.53 to 5.36)        | 710<br>(263 to 928)          | 2.81<br>(1.04 to 3.66)       | -1.41<br>(-1.53 to -1.28) |
| Belize    | All dietary risks           | 2<br>(1 to 2)                | 2.2<br>(1.53 to 2.71)        | 8<br>(6 to 10)               | 3.14<br>(2.13 to 3.98)       | 1.1<br>(0.67 to 1.53)     |
| Belize    | Diet low in milk            | 1<br>(0 to 1)                | 1.14<br>(0.44 to 1.51)       | 4<br>(2 to 6)                | 1.63<br>(0.61 to 2.22)       | 1.06<br>(0.62 to 1.51)    |
| Belize    | Diet low in fiber           | 0<br>(0 to 0)                | 0.11<br>(0.04 to 0.27)       | 0<br>(0 to 1)                | 0.11<br>(0.04 to 0.27)       | -0.19<br>(-0.54 to 0.16)  |
| Belize    | Diet low in calcium         | 1<br>(1 to 1)                | 0.97<br>(0.63 to 1.39)       | 4<br>(2 to 5)                | 1.4<br>(0.91 to 2.02)        | 1.19<br>(0.79 to 1.6)     |
| Belize    | Diet high in red meat       | 0<br>(0 to 0)                | 0.15<br>(0.02 to 0.41)       | 1<br>(0 to 2)                | 0.21<br>(0.02 to 0.57)       | 0.93<br>(0.51 to 1.36)    |
| Belize    | Diet high in processed meat | 0<br>(0 to 0)                | 0.07<br>(0.02 to 0.13)       | 0<br>(0 to 1)                | 0.12<br>(0.02 to 0.22)       | 1.59<br>(1.1 to 2.08)     |
| Belize    | Diet low in whole grains    | 1<br>(0 to 1)                | 1.14<br>(0.44 to 1.51)       | 4<br>(2 to 6)                | 1.63<br>(0.61 to 2.22)       | 1.06<br>(0.62 to 1.51)    |
| Benin     | All dietary risks           | 48<br>(38 to 59)             | 2.59<br>(2.06 to 3.17)       | 123<br>(90 to 163)           | 2.86<br>(2.14 to 3.73)       | 0.42<br>(0.38 to 0.46)    |
| Benin     | Diet low in milk            | 19<br>(7 to 26)              | 1.01<br>(0.38 to 1.37)       | 47<br>(17 to 69)             | 1.1<br>(0.41 to 1.6)         | 0.36<br>(0.33 to 0.4)     |
| Benin     | Diet low in fiber           | 0<br>(0 to 1)                | 0.02<br>(0.01 to 0.04)       | 1<br>(1 to 1)                | 0.02<br>(0.01 to 0.03)       | 0.19<br>(0 to 0.38)       |
| Benin     | Diet low in calcium         | 31<br>(24 to 40)             | 1.69<br>(1.29 to 2.13)       | 78<br>(58 to 105)            | 1.82<br>(1.37 to 2.42)       | 0.34<br>(0.29 to 0.38)    |
| Benin     | Diet high in red meat       | 2<br>(0 to 5)                | 0.1<br>(0.01 to 0.25)        | 5<br>(1 to 12)               | 0.1<br>(0.02 to 0.26)        | 0.33<br>(0.21 to 0.46)    |
| Benin     | Diet high in processed meat | 3<br>(0 to 5)                | 0.14<br>(0.02 to 0.26)       | 8<br>(1 to 16)               | 0.18<br>(0.02 to 0.35)       | 1.17<br>(1.07 to 1.27)    |
| Benin     | Diet low in whole grains    | 19<br>(7 to 26)              | 1.01<br>(0.38 to 1.37)       | 47<br>(17 to 69)             | 1.1<br>(0.41 to 1.6)         | 0.36<br>(0.33 to 0.4)     |
| Bermuda   | All dietary risks           | 5<br>(3 to 6)                | 8.12<br>(5.52 to 10.41)      | 9<br>(6 to 11)               | 6.3<br>(4.39 to 8.12)        | -0.82<br>(-0.88 to -0.77) |
| Bermuda   | Diet low in milk            | 3<br>(1 to 3)                | 4.48<br>(1.69 to 5.81)       | 4<br>(2 to 6)                | 3.19<br>(1.21 to 4.42)       | -1.13<br>(-1.24 to -1.03) |

| Countries                           | Risk factors                | 1990                         |                              | 2019                         |                              | 1990-2019                 |
|-------------------------------------|-----------------------------|------------------------------|------------------------------|------------------------------|------------------------------|---------------------------|
|                                     |                             | Number of deaths<br>(95% UI) | ASDR per 100,000<br>(95% UI) | Number of deaths<br>(95% UI) | ASDR per 100,000<br>(95% UI) | EAPC of ASDR<br>(95% CI)  |
| Bermuda                             | Diet low in fiber           | 0<br>(0 to 1)                | 0.45<br>(0.14 to 1.06)       | 1<br>(0 to 2)                | 0.64<br>(0.23 to 1.21)       | 1.31<br>(0.97 to 1.65)    |
| Bermuda                             | Diet low in calcium         | 1<br>(1 to 2)                | 2.54<br>(1.36 to 4.2)        | 3<br>(2 to 5)                | 2.18<br>(1.29 to 3.34)       | -0.55<br>(-0.65 to -0.46) |
| Bermuda                             | Diet high in red meat       | 1<br>(0 to 2)                | 1.28<br>(0.22 to 2.87)       | 1<br>(0 to 3)                | 0.97<br>(0.18 to 2.07)       | -0.78<br>(-0.91 to -0.65) |
| Bermuda                             | Diet high in processed meat | 0<br>(0 to 0)                | 0.31<br>(0.07 to 0.54)       | 0<br>(0 to 1)                | 0.21<br>(0.05 to 0.39)       | -1.18<br>(-1.34 to -1.02) |
| Bermuda                             | Diet low in whole grains    | 3<br>(1 to 3)                | 4.48<br>(1.69 to 5.81)       | 4<br>(2 to 6)                | 3.19<br>(1.21 to 4.42)       | -1.13<br>(-1.24 to -1.03) |
| Bhutan                              | All dietary risks           | 4<br>(2 to 6)                | 1.9<br>(1.07 to 2.74)        | 13<br>(8 to 19)              | 2.57<br>(1.62 to 3.66)       | 1.04<br>(1.02 to 1.05)    |
| Bhutan                              | Diet low in milk            | 1<br>(1 to 2)                | 0.65<br>(0.25 to 1.07)       | 5<br>(2 to 8)                | 0.96<br>(0.36 to 1.49)       | 1.36<br>(1.34 to 1.38)    |
| Bhutan                              | Diet low in fiber           | 1<br>(0 to 1)                | 0.24<br>(0.09 to 0.43)       | 1<br>(0 to 2)                | 0.22<br>(0.07 to 0.45)       | -0.36<br>(-0.38 to -0.34) |
| Bhutan                              | Diet low in calcium         | 2<br>(1 to 4)                | 1.15<br>(0.65 to 1.71)       | 7<br>(4 to 11)               | 1.46<br>(0.89 to 2.13)       | 0.81<br>(0.79 to 0.82)    |
| Bhutan                              | Diet high in red meat       | 0<br>(0 to 0)                | 0.06<br>(0.01 to 0.16)       | 1<br>(0 to 1)                | 0.1<br>(0.01 to 0.26)        | 1.7<br>(1.66 to 1.75)     |
| Bhutan                              | Diet high in processed meat | 0<br>(0 to 1)                | 0.12<br>(0.01 to 0.25)       | 1<br>(0 to 2)                | 0.21<br>(0.03 to 0.41)       | 1.98<br>(1.95 to 2.01)    |
| Bhutan                              | Diet low in whole grains    | 1<br>(1 to 2)                | 0.65<br>(0.25 to 1.07)       | 5<br>(2 to 8)                | 0.96<br>(0.36 to 1.49)       | 1.36<br>(1.34 to 1.38)    |
| Bolivia<br>(Plurinational State of) | All dietary risks           | 109<br>(75 to 142)           | 3.73<br>(2.61 to 4.82)       | 398<br>(261 to 549)          | 4.94<br>(3.23 to 6.76)       | 0.9<br>(0.87 to 0.94)     |
| Bolivia<br>(Plurinational State of) | Diet low in milk            | 43<br>(17 to 61)             | 1.47<br>(0.58 to 2.06)       | 154<br>(59 to 232)           | 1.91<br>(0.72 to 2.87)       | 0.84<br>(0.79 to 0.89)    |
| Bolivia<br>(Plurinational State of) | Diet low in fiber           | 6<br>(2 to 13)               | 0.2<br>(0.07 to 0.45)        | 22<br>(7 to 51)              | 0.28<br>(0.1 to 0.65)        | 1.11<br>(0.89 to 1.33)    |
| Bolivia<br>(Plurinational State of) | Diet low in calcium         | 67<br>(45 to 92)             | 2.31<br>(1.58 to 3.1)        | 240<br>(152 to 334)          | 2.99<br>(1.89 to 4.13)       | 0.82<br>(0.78 to 0.85)    |

| Countries                           | Risk factors                | 1990                         |                              | 2019                         |                              | 1990-2019                 |
|-------------------------------------|-----------------------------|------------------------------|------------------------------|------------------------------|------------------------------|---------------------------|
|                                     |                             | Number of deaths<br>(95% UI) | ASDR per 100,000<br>(95% UI) | Number of deaths<br>(95% UI) | ASDR per 100,000<br>(95% UI) | EAPC of ASDR<br>(95% CI)  |
| Bolivia<br>(Plurinational State of) | Diet high in red meat       | 9<br>(1 to 23)               | 0.31<br>(0.03 to 0.79)       | 37<br>(4 to 96)              | 0.45<br>(0.05 to 1.17)       | 1.33<br>(1.24 to 1.43)    |
| Bolivia<br>(Plurinational State of) | Diet high in processed meat | 2<br>(1 to 3)                | 0.05<br>(0.03 to 0.09)       | 7<br>(3 to 12)               | 0.08<br>(0.03 to 0.14)       | 1.44<br>(1.4 to 1.48)     |
| Bolivia<br>(Plurinational State of) | Diet low in whole grains    | 43<br>(17 to 61)             | 1.47<br>(0.58 to 2.06)       | 154<br>(59 to 232)           | 1.91<br>(0.72 to 2.87)       | 0.84<br>(0.79 to 0.89)    |
| Bosnia and Herzegovina              | All dietary risks           | 167<br>(119 to 205)          | 4.45<br>(3.19 to 5.46)       | 340<br>(202 to 467)          | 5.76<br>(3.42 to 7.89)       | 1.13<br>(0.91 to 1.35)    |
| Bosnia and Herzegovina              | Diet low in milk            | 86<br>(32 to 113)            | 2.28<br>(0.85 to 2.98)       | 196<br>(72 to 280)           | 3.31<br>(1.21 to 4.73)       | 1.59<br>(1.33 to 1.84)    |
| Bosnia and Herzegovina              | Diet low in fiber           | 2<br>(1 to 3)                | 0.05<br>(0.03 to 0.09)       | 4<br>(3 to 6)                | 0.06<br>(0.04 to 0.11)       | 0.96<br>(0.71 to 1.21)    |
| Bosnia and Herzegovina              | Diet low in calcium         | 69<br>(44 to 101)            | 1.87<br>(1.21 to 2.73)       | 89<br>(43 to 155)            | 1.52<br>(0.73 to 2.62)       | -0.77<br>(-0.95 to -0.59) |
| Bosnia and Herzegovina              | Diet high in red meat       | 10<br>(1 to 27)              | 0.27<br>(0.03 to 0.7)        | 31<br>(3 to 89)              | 0.53<br>(0.05 to 1.51)       | 3.03<br>(2.67 to 3.4)     |
| Bosnia and Herzegovina              | Diet high in processed meat | 20<br>(3 to 33)              | 0.51<br>(0.08 to 0.84)       | 52<br>(10 to 92)             | 0.89<br>(0.17 to 1.55)       | 2.43<br>(2.09 to 2.76)    |
| Bosnia and Herzegovina              | Diet low in whole grains    | 86<br>(32 to 113)            | 2.28<br>(0.85 to 2.98)       | 196<br>(72 to 280)           | 3.31<br>(1.21 to 4.73)       | 1.59<br>(1.33 to 1.84)    |
| Botswana                            | All dietary risks           | 18<br>(12 to 24)             | 3.66<br>(2.6 to 4.92)        | 60<br>(38 to 85)             | 5.04<br>(3.3 to 7.03)        | 0.82<br>(0.52 to 1.13)    |
| Botswana                            | Diet low in milk            | 8<br>(3 to 12)               | 1.58<br>(0.59 to 2.34)       | 28<br>(10 to 42)             | 2.32<br>(0.84 to 3.41)       | 1.04<br>(0.73 to 1.34)    |
| Botswana                            | Diet low in fiber           | 1<br>(0 to 2)                | 0.17<br>(0.06 to 0.4)        | 3<br>(1 to 7)                | 0.23<br>(0.08 to 0.55)       | 0.75<br>(0.15 to 1.35)    |
| Botswana                            | Diet low in calcium         | 10<br>(7 to 13)              | 1.96<br>(1.39 to 2.69)       | 29<br>(18 to 43)             | 2.46<br>(1.55 to 3.63)       | 0.51<br>(0.21 to 0.81)    |
| Botswana                            | Diet high in red meat       | 2<br>(0 to 4)                | 0.31<br>(0.02 to 0.84)       | 6<br>(0 to 16)               | 0.46<br>(0.04 to 1.29)       | 1.05<br>(0.82 to 1.29)    |
| Botswana                            | Diet high in processed meat | 1<br>(0 to 1)                | 0.11<br>(0.02 to 0.22)       | 2<br>(0 to 5)                | 0.18<br>(0.03 to 0.36)       | 1.35<br>(1.07 to 1.62)    |

| Countries         | Risk factors                | 1990                         |                              | 2019                         |                              | 1990-2019                 |
|-------------------|-----------------------------|------------------------------|------------------------------|------------------------------|------------------------------|---------------------------|
|                   |                             | Number of deaths<br>(95% UI) | ASDR per 100,000<br>(95% UI) | Number of deaths<br>(95% UI) | ASDR per 100,000<br>(95% UI) | EAPC of ASDR<br>(95% CI)  |
| Botswana          | Diet low in whole grains    | 8<br>(3 to 12)               | 1.58<br>(0.59 to 2.34)       | 28<br>(10 to 42)             | 2.32<br>(0.84 to 3.41)       | 1.04<br>(0.73 to 1.34)    |
| Brazil            | All dietary risks           | 2858<br>(2180 to 3447)       | 3.53<br>(2.7 to 4.24)        | 8766<br>(6546 to 10783)      | 3.78<br>(2.8 to 4.64)        | 0.27<br>(0.12 to 0.43)    |
| Brazil            | Diet low in milk            | 1256<br>(468 to 1657)        | 1.54<br>(0.58 to 2.03)       | 3874<br>(1445 to 5213)       | 1.67<br>(0.62 to 2.25)       | 0.33<br>(0.18 to 0.47)    |
| Brazil            | Diet low in fiber           | 223<br>(87 to 420)           | 0.28<br>(0.11 to 0.52)       | 496<br>(197 to 1013)         | 0.21<br>(0.08 to 0.44)       | -1.26<br>(-1.39 to -1.12) |
| Brazil            | Diet low in calcium         | 1308<br>(943 to 1756)        | 1.64<br>(1.18 to 2.19)       | 2799<br>(1652 to 4311)       | 1.22<br>(0.72 to 1.87)       | -1.3<br>(-1.43 to -1.17)  |
| Brazil            | Diet high in red meat       | 375<br>(73 to 814)           | 0.45<br>(0.09 to 0.99)       | 2355<br>(877 to 3841)        | 1<br>(0.37 to 1.64)          | 3.06<br>(2.44 to 3.69)    |
| Brazil            | Diet high in processed meat | 110<br>(19 to 191)           | 0.13<br>(0.02 to 0.23)       | 492<br>(67 to 856)           | 0.21<br>(0.03 to 0.36)       | 2.03<br>(1.91 to 2.15)    |
| Brazil            | Diet low in whole grains    | 1256<br>(468 to 1657)        | 1.54<br>(0.58 to 2.03)       | 3874<br>(1445 to 5213)       | 1.67<br>(0.62 to 2.25)       | 0.33<br>(0.18 to 0.47)    |
| Brunei Darussalam | All dietary risks           | 8<br>(6 to 10)               | 9.65<br>(6.83 to 12.49)      | 23<br>(16 to 29)             | 9.54<br>(6.65 to 11.98)      | 0.64<br>(0.35 to 0.92)    |
| Brunei Darussalam | Diet low in milk            | 4<br>(1 to 5)                | 4.34<br>(1.62 to 6.06)       | 11<br>(4 to 15)              | 4.5<br>(1.68 to 6.19)        | 0.79<br>(0.53 to 1.05)    |
| Brunei Darussalam | Diet low in fiber           | 1<br>(0 to 1)                | 0.69<br>(0.24 to 1.5)        | 3<br>(1 to 5)                | 1.08<br>(0.37 to 1.99)       | 2.54<br>(2.19 to 2.89)    |
| Brunei Darussalam | Diet low in calcium         | 3<br>(2 to 5)                | 4.22<br>(2.65 to 6.09)       | 8<br>(5 to 13)               | 3.68<br>(2.28 to 5.47)       | 0.14<br>(-0.16 to 0.45)   |
| Brunei Darussalam | Diet high in red meat       | 1<br>(0 to 2)                | 0.94<br>(0.08 to 2.51)       | 2<br>(0 to 5)                | 0.76<br>(0.07 to 2.1)        | -0.09<br>(-0.41 to 0.22)  |
| Brunei Darussalam | Diet high in processed meat | 1<br>(0 to 1)                | 0.75<br>(0.1 to 1.35)        | 2<br>(0 to 4)                | 0.79<br>(0.1 to 1.41)        | 0.94<br>(0.64 to 1.23)    |
| Brunei Darussalam | Diet low in whole grains    | 4<br>(1 to 5)                | 4.34<br>(1.62 to 6.06)       | 11<br>(4 to 15)              | 4.5<br>(1.68 to 6.19)        | 0.79<br>(0.53 to 1.05)    |
| Bulgaria          | All dietary risks           | 793<br>(560 to 978)          | 6.5<br>(4.61 to 8.02)        | 1266<br>(869 to 1715)        | 8.68<br>(5.94 to 11.8)       | 2.29<br>(1.8 to 2.78)     |
| Bulgaria          | Diet low in milk            | 434<br>(173 to 555)          | 3.55<br>(1.41 to 4.55)       | 619<br>(227 to 871)          | 4.23<br>(1.57 to 5.97)       | 1.83<br>(1.36 to 2.31)    |

| Countries    | Risk factors                | 1990                         |                              | 2019                         |                              | 1990-2019                 |
|--------------|-----------------------------|------------------------------|------------------------------|------------------------------|------------------------------|---------------------------|
|              |                             | Number of deaths<br>(95% UI) | ASDR per 100,000<br>(95% UI) | Number of deaths<br>(95% UI) | ASDR per 100,000<br>(95% UI) | EAPC of ASDR<br>(95% CI)  |
| Bulgaria     | Diet low in fiber           | 53<br>(18 to 114)            | 0.44<br>(0.15 to 0.95)       | 96<br>(33 to 198)            | 0.65<br>(0.22 to 1.34)       | 2.27<br>(1.68 to 2.86)    |
| Bulgaria     | Diet low in calcium         | 184<br>(95 to 319)           | 1.52<br>(0.78 to 2.63)       | 326<br>(176 to 545)          | 2.2<br>(1.18 to 3.66)        | 2.34<br>(1.83 to 2.85)    |
| Bulgaria     | Diet high in red meat       | 137<br>(29 to 275)           | 1.12<br>(0.25 to 2.24)       | 241<br>(62 to 471)           | 1.7<br>(0.47 to 3.32)        | 3.25<br>(2.52 to 3.98)    |
| Bulgaria     | Diet high in processed meat | 98<br>(17 to 159)            | 0.8<br>(0.14 to 1.3)         | 181<br>(43 to 301)           | 1.26<br>(0.31 to 2.08)       | 3.3<br>(2.6 to 3.99)      |
| Bulgaria     | Diet low in whole grains    | 434<br>(173 to 555)          | 3.55<br>(1.41 to 4.55)       | 619<br>(227 to 871)          | 4.23<br>(1.57 to 5.97)       | 1.83<br>(1.36 to 2.31)    |
| Burkina Faso | All dietary risks           | 92<br>(69 to 120)            | 2.38<br>(1.81 to 3.09)       | 225<br>(168 to 298)          | 2.82<br>(2.14 to 3.66)       | 0.6<br>(0.45 to 0.75)     |
| Burkina Faso | Diet low in milk            | 37<br>(14 to 53)             | 0.95<br>(0.36 to 1.36)       | 91<br>(34 to 130)            | 1.14<br>(0.43 to 1.62)       | 0.65<br>(0.5 to 0.8)      |
| Burkina Faso | Diet low in fiber           | 1<br>(1 to 3)                | 0.04<br>(0.02 to 0.09)       | 2<br>(1 to 4)                | 0.03<br>(0.01 to 0.05)       | -1.34<br>(-1.75 to -0.93) |
| Burkina Faso | Diet low in calcium         | 58<br>(43 to 76)             | 1.51<br>(1.13 to 1.98)       | 136<br>(99 to 181)           | 1.72<br>(1.27 to 2.28)       | 0.45<br>(0.3 to 0.6)      |
| Burkina Faso | Diet high in red meat       | 5<br>(0 to 13)               | 0.12<br>(0.01 to 0.33)       | 14<br>(1 to 39)              | 0.17<br>(0.01 to 0.47)       | 1.23<br>(1.17 to 1.29)    |
| Burkina Faso | Diet high in processed meat | 5<br>(1 to 9)                | 0.12<br>(0.01 to 0.23)       | 15<br>(2 to 27)              | 0.17<br>(0.02 to 0.32)       | 1.41<br>(1.31 to 1.5)     |
| Burkina Faso | Diet low in whole grains    | 37<br>(14 to 53)             | 0.95<br>(0.36 to 1.36)       | 91<br>(34 to 130)            | 1.14<br>(0.43 to 1.62)       | 0.65<br>(0.5 to 0.8)      |
| Burundi      | All dietary risks           | 65<br>(49 to 85)             | 2.93<br>(2.2 to 3.78)        | 117<br>(79 to 172)           | 2.8<br>(1.93 to 4.05)        | -0.32<br>(-0.39 to -0.25) |
| Burundi      | Diet low in milk            | 29<br>(11 to 41)             | 1.29<br>(0.47 to 1.82)       | 51<br>(18 to 81)             | 1.21<br>(0.44 to 1.9)        | -0.38<br>(-0.46 to -0.31) |
| Burundi      | Diet low in fiber           | 0<br>(0 to 1)                | 0.02<br>(0.01 to 0.03)       | 1<br>(1 to 2)                | 0.03<br>(0.01 to 0.05)       | 1.25<br>(1.15 to 1.35)    |
| Burundi      | Diet low in calcium         | 40<br>(28 to 52)             | 1.8<br>(1.32 to 2.33)        | 74<br>(50 to 110)            | 1.78<br>(1.21 to 2.61)       | -0.2<br>(-0.28 to -0.13)  |
| Burundi      | Diet high in red meat       | 2<br>(0 to 4)                | 0.07<br>(0.02 to 0.17)       | 2<br>(1 to 6)                | 0.06<br>(0.02 to 0.14)       | -0.99<br>(-1.22 to -0.77) |
| Burundi      | Diet high in processed meat | 3<br>(0 to 5)                | 0.11<br>(0.02 to 0.22)       | 4<br>(1 to 9)                | 0.1<br>(0.01 to 0.21)        | -0.62<br>(-0.73 to -0.5)  |

| Countries  | Risk factors                | 1990                         |                              | 2019                         |                              | 1990-2019                 |
|------------|-----------------------------|------------------------------|------------------------------|------------------------------|------------------------------|---------------------------|
|            |                             | Number of deaths<br>(95% UI) | ASDR per 100,000<br>(95% UI) | Number of deaths<br>(95% UI) | ASDR per 100,000<br>(95% UI) | EAPC of ASDR<br>(95% CI)  |
| Burundi    | Diet low in whole grains    | 29<br>(11 to 41)             | 1.29<br>(0.47 to 1.82)       | 51<br>(18 to 81)             | 1.21<br>(0.44 to 1.9)        | -0.38<br>(-0.46 to -0.31) |
| Cabo Verde | All dietary risks           | 4<br>(3 to 4)                | 1.59<br>(1.23 to 1.91)       | 14<br>(10 to 19)             | 3.46<br>(2.35 to 4.52)       | 1.98<br>(1.62 to 2.35)    |
| Cabo Verde | Diet low in milk            | 2<br>(1 to 2)                | 0.64<br>(0.24 to 0.88)       | 7<br>(2 to 10)               | 1.61<br>(0.6 to 2.28)        | 2.56<br>(2.21 to 2.91)    |
| Cabo Verde | Diet low in fiber           | 0<br>(0 to 0)                | 0.06<br>(0.02 to 0.15)       | 1<br>(0 to 1)                | 0.12<br>(0.04 to 0.3)        | 1.26<br>(0.7 to 1.81)     |
| Cabo Verde | Diet low in calcium         | 2<br>(2 to 3)                | 0.91<br>(0.7 to 1.17)        | 7<br>(4 to 10)               | 1.65<br>(1.04 to 2.34)       | 1.21<br>(0.82 to 1.61)    |
| Cabo Verde | Diet high in red meat       | 0<br>(0 to 1)                | 0.09<br>(0.01 to 0.24)       | 1<br>(0 to 3)                | 0.24<br>(0.03 to 0.65)       | 2.6<br>(2.21 to 2.99)     |
| Cabo Verde | Diet high in processed meat | 0<br>(0 to 0)                | 0.1<br>(0.01 to 0.17)        | 1<br>(0 to 2)                | 0.25<br>(0.03 to 0.46)       | 2.85<br>(2.57 to 3.14)    |
| Cabo Verde | Diet low in whole grains    | 2<br>(1 to 2)                | 0.64<br>(0.24 to 0.88)       | 7<br>(2 to 10)               | 1.61<br>(0.6 to 2.28)        | 2.56<br>(2.21 to 2.91)    |
| Cambodia   | All dietary risks           | 173<br>(128 to 233)          | 4.05<br>(3.05 to 5.47)       | 649<br>(481 to 816)          | 5.86<br>(4.39 to 7.28)       | 1.29<br>(1.25 to 1.33)    |
| Cambodia   | Diet low in milk            | 45<br>(18 to 72)             | 1.06<br>(0.43 to 1.66)       | 170<br>(64 to 258)           | 1.52<br>(0.58 to 2.3)        | 1.28<br>(1.24 to 1.31)    |
| Cambodia   | Diet low in fiber           | 39<br>(21 to 59)             | 0.91<br>(0.5 to 1.38)        | 125<br>(66 to 182)           | 1.13<br>(0.61 to 1.65)       | 0.66<br>(0.62 to 0.7)     |
| Cambodia   | Diet low in calcium         | 111<br>(77 to 156)           | 2.59<br>(1.81 to 3.64)       | 418<br>(310 to 536)          | 3.78<br>(2.82 to 4.81)       | 1.32<br>(1.27 to 1.36)    |
| Cambodia   | Diet high in red meat       | 8<br>(1 to 22)               | 0.18<br>(0.02 to 0.5)        | 35<br>(3 to 97)              | 0.31<br>(0.03 to 0.84)       | 1.79<br>(1.76 to 1.82)    |
| Cambodia   | Diet high in processed meat | 2<br>(1 to 3)                | 0.05<br>(0.03 to 0.08)       | 10<br>(5 to 16)              | 0.09<br>(0.04 to 0.14)       | 2.16<br>(2.08 to 2.24)    |
| Cambodia   | Diet low in whole grains    | 45<br>(18 to 72)             | 1.06<br>(0.43 to 1.66)       | 170<br>(64 to 258)           | 1.52<br>(0.58 to 2.3)        | 1.28<br>(1.24 to 1.31)    |
| Cameroon   | All dietary risks           | 144<br>(106 to 184)          | 3.66<br>(2.73 to 4.67)       | 410<br>(291 to 569)          | 3.97<br>(2.89 to 5.32)       | 0.27<br>(0.24 to 0.3)     |
| Cameroon   | Diet low in milk            | 55<br>(21 to 77)             | 1.39<br>(0.52 to 1.94)       | 158<br>(57 to 237)           | 1.52<br>(0.55 to 2.26)       | 0.34<br>(0.32 to 0.37)    |
| Cameroon   | Diet low in fiber           | 2<br>(1 to 4)                | 0.04<br>(0.02 to 0.11)       | 3<br>(2 to 6)                | 0.03<br>(0.02 to 0.06)       | -1.77<br>(-2.05 to -1.49) |

| Countries                | Risk factors                | 1990                         |                              | 2019                         |                              | 1990-2019                 |
|--------------------------|-----------------------------|------------------------------|------------------------------|------------------------------|------------------------------|---------------------------|
|                          |                             | Number of deaths<br>(95% UI) | ASDR per 100,000<br>(95% UI) | Number of deaths<br>(95% UI) | ASDR per 100,000<br>(95% UI) | EAPC of ASDR<br>(95% CI)  |
| Cameroon                 | Diet low in calcium         | 92<br>(68 to 119)            | 2.35<br>(1.74 to 3.03)       | 253<br>(179 to 354)          | 2.47<br>(1.77 to 3.39)       | 0.13<br>(0.09 to 0.17)    |
| Cameroon                 | Diet high in red meat       | 8<br>(1 to 23)               | 0.2<br>(0.02 to 0.57)        | 23<br>(2 to 64)              | 0.22<br>(0.02 to 0.59)       | 0.3<br>(0.25 to 0.36)     |
| Cameroon                 | Diet high in processed meat | 9<br>(1 to 17)               | 0.21<br>(0.02 to 0.4)        | 29<br>(4 to 56)              | 0.26<br>(0.03 to 0.5)        | 0.9<br>(0.82 to 0.97)     |
| Cameroon                 | Diet low in whole grains    | 55<br>(21 to 77)             | 1.39<br>(0.52 to 1.94)       | 158<br>(57 to 237)           | 1.52<br>(0.55 to 2.26)       | 0.34<br>(0.32 to 0.37)    |
| Canada                   | All dietary risks           | 2051<br>(1504 to 2552)       | 6.38<br>(4.68 to 7.93)       | 3525<br>(2515 to 4452)       | 4.94<br>(3.55 to 6.22)       | -0.88<br>(-0.97 to -0.8)  |
| Canada                   | Diet low in milk            | 976<br>(367 to 1291)         | 3.03<br>(1.14 to 4.01)       | 1763<br>(660 to 2370)        | 2.46<br>(0.92 to 3.31)       | -0.73<br>(-0.79 to -0.67) |
| Canada                   | Diet low in fiber           | 144<br>(50 to 302)           | 0.45<br>(0.16 to 0.94)       | 149<br>(50 to 363)           | 0.2<br>(0.07 to 0.5)         | -2.64<br>(-2.89 to -2.38) |
| Canada                   | Diet low in calcium         | 537<br>(285 to 906)          | 1.67<br>(0.89 to 2.81)       | 863<br>(420 to 1512)         | 1.2<br>(0.58 to 2.1)         | -1.01<br>(-1.18 to -0.84) |
| Canada                   | Diet high in red meat       | 405<br>(97 to 767)           | 1.26<br>(0.3 to 2.38)        | 646<br>(130 to 1313)         | 0.92<br>(0.19 to 1.84)       | -1.23<br>(-1.35 to -1.1)  |
| Canada                   | Diet high in processed meat | 288<br>(74 to 461)           | 0.9<br>(0.23 to 1.44)        | 563<br>(150 to 881)          | 0.8<br>(0.23 to 1.25)        | -0.46<br>(-0.52 to -0.4)  |
| Canada                   | Diet low in whole grains    | 976<br>(367 to 1291)         | 3.03<br>(1.14 to 4.01)       | 1763<br>(660 to 2370)        | 2.46<br>(0.92 to 3.31)       | -0.73<br>(-0.79 to -0.67) |
| Central African Republic | All dietary risks           | 32<br>(22 to 42)             | 2.93<br>(2.18 to 3.85)       | 50<br>(34 to 73)             | 2.52<br>(1.78 to 3.57)       | -0.44<br>(-0.5 to -0.39)  |
| Central African Republic | Diet low in milk            | 13<br>(5 to 18)              | 1.16<br>(0.44 to 1.68)       | 20<br>(7 to 30)              | 0.99<br>(0.36 to 1.51)       | -0.47<br>(-0.52 to -0.41) |
| Central African Republic | Diet low in fiber           | 1<br>(0 to 2)                | 0.09<br>(0.03 to 0.22)       | 1<br>(0 to 3)                | 0.07<br>(0.03 to 0.17)       | -0.55<br>(-0.91 to -0.19) |
| Central African Republic | Diet low in calcium         | 19<br>(13 to 26)             | 1.79<br>(1.28 to 2.37)       | 30<br>(20 to 43)             | 1.51<br>(1.07 to 2.17)       | -0.53<br>(-0.6 to -0.45)  |
| Central African Republic | Diet high in red meat       | 3<br>(0 to 7)                | 0.23<br>(0.02 to 0.66)       | 5<br>(1 to 13)               | 0.24<br>(0.03 to 0.62)       | 0.36<br>(0.18 to 0.55)    |
| Central African Republic | Diet high in processed meat | 1<br>(0 to 2)                | 0.1<br>(0.02 to 0.2)         | 2<br>(0 to 4)                | 0.09<br>(0.01 to 0.18)       | -0.3<br>(-0.39 to -0.2)   |
| Central African Republic | Diet low in whole grains    | 13<br>(5 to 18)              | 1.16<br>(0.44 to 1.68)       | 20<br>(7 to 30)              | 0.99<br>(0.36 to 1.51)       | -0.47<br>(-0.52 to -0.41) |



| Countries | Risk factors                | 1990                         |                              | 2019                         |                              | 1990-2019                |
|-----------|-----------------------------|------------------------------|------------------------------|------------------------------|------------------------------|--------------------------|
|           |                             | Number of deaths<br>(95% UI) | ASDR per 100,000<br>(95% UI) | Number of deaths<br>(95% UI) | ASDR per 100,000<br>(95% UI) | EAPC of ASDR<br>(95% CI) |
| Chad      | All dietary risks           | 62<br>(46 to 80)             | 2.36<br>(1.76 to 3.03)       | 156<br>(115 to 210)          | 3.16<br>(2.34 to 4.2)        | 1.14<br>(1.08 to 1.2)    |
| Chad      | Diet low in milk            | 30<br>(15 to 41)             | 1.14<br>(0.57 to 1.53)       | 78<br>(38 to 109)            | 1.57<br>(0.78 to 2.18)       | 1.25<br>(1.18 to 1.32)   |
| Chad      | Diet low in fiber           | 2<br>(1 to 5)                | 0.07<br>(0.02 to 0.17)       | 2<br>(1 to 6)                | 0.05<br>(0.02 to 0.12)       | -1.7<br>(-1.99 to -1.41) |
| Chad      | Diet low in calcium         | 35<br>(26 to 46)             | 1.33<br>(0.98 to 1.76)       | 85<br>(61 to 117)            | 1.74<br>(1.28 to 2.33)       | 1.05<br>(0.99 to 1.1)    |
| Chad      | Diet high in red meat       | 4<br>(0 to 10)               | 0.13<br>(0.01 to 0.37)       | 9<br>(1 to 25)               | 0.17<br>(0.01 to 0.48)       | 1.02<br>(0.96 to 1.08)   |
| Chad      | Diet high in processed meat | 3<br>(0 to 5)                | 0.1<br>(0.01 to 0.2)         | 8<br>(1 to 16)               | 0.16<br>(0.02 to 0.31)       | 1.67<br>(1.58 to 1.76)   |
| Chad      | Diet low in whole grains    | 30<br>(15 to 41)             | 1.14<br>(0.57 to 1.53)       | 78<br>(38 to 109)            | 1.57<br>(0.78 to 2.18)       | 1.25<br>(1.18 to 1.32)   |
| Chile     | All dietary risks           | 484<br>(379 to 565)          | 5.29<br>(4.15 to 6.16)       | 1404<br>(1087 to 1674)       | 5.86<br>(4.54 to 6.99)       | 0.69<br>(0.57 to 0.8)    |
| Chile     | Diet low in milk            | 220<br>(90 to 281)           | 2.39<br>(0.97 to 3.06)       | 597<br>(219 to 774)          | 2.49<br>(0.91 to 3.23)       | 0.4<br>(0.28 to 0.52)    |
| Chile     | Diet low in fiber           | 39<br>(14 to 72)             | 0.44<br>(0.16 to 0.79)       | 76<br>(25 to 165)            | 0.32<br>(0.11 to 0.69)       | -0.83<br>(-0.97 to -0.7) |
| Chile     | Diet low in calcium         | 215<br>(164 to 275)          | 2.37<br>(1.78 to 3.02)       | 557<br>(390 to 762)          | 2.33<br>(1.63 to 3.18)       | 0.39<br>(0.24 to 0.55)   |
| Chile     | Diet high in red meat       | 41<br>(4 to 104)             | 0.45<br>(0.05 to 1.12)       | 218<br>(54 to 417)           | 0.91<br>(0.22 to 1.74)       | 2.81<br>(2.67 to 2.96)   |
| Chile     | Diet high in processed meat | 61<br>(14 to 93)             | 0.66<br>(0.15 to 1.01)       | 223<br>(72 to 337)           | 0.93<br>(0.3 to 1.41)        | 1.52<br>(1.42 to 1.61)   |
| Chile     | Diet low in whole grains    | 220<br>(90 to 281)           | 2.39<br>(0.97 to 3.06)       | 597<br>(219 to 774)          | 2.49<br>(0.91 to 3.23)       | 0.4<br>(0.28 to 0.52)    |
| China     | All dietary risks           | 29656<br>(23146 to 35344)    | 3.84<br>(3.01 to 4.57)       | 90407<br>(65691 to 114669)   | 4.76<br>(3.48 to 6.01)       | 1.11<br>(0.85 to 1.37)   |
| China     | Diet low in milk            | 12319<br>(4612 to 16523)     | 1.59<br>(0.6 to 2.13)        | 41733<br>(15441 to 57649)    | 2.2<br>(0.82 to 3.04)        | 1.45<br>(1.19 to 1.71)   |
| China     | Diet low in fiber           | 1914<br>(748 to 3591)        | 0.25<br>(0.1 to 0.46)        | 2548<br>(1057 to 5592)       | 0.14<br>(0.06 to 0.3)        | -1.63<br>(-1.96 to -1.3) |
| China     | Diet low in calcium         | 16556<br>(13032 to 21225)    | 2.16<br>(1.71 to 2.77)       | 40118<br>(27305 to 55646)    | 2.13<br>(1.45 to 2.94)       | 0.33<br>(0.03 to 0.63)   |

| Countries | Risk factors                   | 1990                            |                                 | 2019                            |                                 | 1990-2019                 |
|-----------|--------------------------------|---------------------------------|---------------------------------|---------------------------------|---------------------------------|---------------------------|
|           |                                | Number of<br>deaths<br>(95% UI) | ASDR per<br>100,000<br>(95% UI) | Number of<br>deaths<br>(95% UI) | ASDR per<br>100,000<br>(95% UI) | EAPC of ASDR<br>(95% CI)  |
| China     | Diet high in red<br>meat       | 2722<br>(392 to 6670)           | 0.34<br>(0.05 to 0.84)          | 15719<br>(3800 to 30286)        | 0.81<br>(0.2 to 1.57)           | 3.6<br>(3.33 to 3.86)     |
| China     | Diet high in<br>processed meat | 573<br>(264 to 906)             | 0.07<br>(0.03 to 0.11)          | 3151<br>(666 to 5697)           | 0.16<br>(0.04 to 0.29)          | 3.47<br>(3.17 to 3.76)    |
| China     | Diet low in<br>whole grains    | 12319<br>(4612 to 16523)        | 1.59<br>(0.6 to 2.13)           | 41733<br>(15441 to 57649)       | 2.2<br>(0.82 to 3.04)           | 1.45<br>(1.19 to 1.71)    |
| Colombia  | All dietary risks              | 543<br>(417 to 644)             | 3.36<br>(2.6 to 3.97)           | 1643<br>(1082 to 2256)          | 3.08<br>(2.03 to 4.23)          | -0.24<br>(-0.35 to -0.12) |
| Colombia  | Diet low in milk               | 228<br>(85 to 304)              | 1.4<br>(0.53 to 1.87)           | 762<br>(279 to 1100)            | 1.43<br>(0.52 to 2.06)          | 0<br>(-0.1 to 0.1)        |
| Colombia  | Diet low in fiber              | 47<br>(17 to 90)                | 0.29<br>(0.11 to 0.55)          | 111<br>(37 to 244)              | 0.21<br>(0.07 to 0.46)          | -0.67<br>(-0.97 to -0.38) |
| Colombia  | Diet low in<br>calcium         | 282<br>(213 to 361)             | 1.76<br>(1.32 to 2.25)          | 744<br>(464 to 1078)            | 1.39<br>(0.87 to 2.02)          | -0.64<br>(-0.8 to -0.49)  |
| Colombia  | Diet high in red<br>meat       | 48<br>(4 to 127)                | 0.29<br>(0.02 to 0.76)          | 165<br>(16 to 448)              | 0.31<br>(0.03 to 0.85)          | 0.22<br>(0.12 to 0.32)    |
| Colombia  | Diet high in<br>processed meat | 17<br>(3 to 29)                 | 0.1<br>(0.02 to 0.17)           | 72<br>(11 to 141)               | 0.14<br>(0.02 to 0.26)          | 1.18<br>(1.06 to 1.31)    |
| Colombia  | Diet low in<br>whole grains    | 228<br>(85 to 304)              | 1.4<br>(0.53 to 1.87)           | 762<br>(279 to 1100)            | 1.43<br>(0.52 to 2.06)          | 0<br>(-0.1 to 0.1)        |
| Comoros   | All dietary risks              | 7<br>(4 to 9)                   | 3.16<br>(2.03 to 4.27)          | 16<br>(11 to 21)                | 3.5<br>(2.41 to 4.59)           | 0.24<br>(0.14 to 0.33)    |
| Comoros   | Diet low in milk               | 2<br>(1 to 4)                   | 1.19<br>(0.44 to 1.79)          | 6<br>(2 to 9)                   | 1.33<br>(0.46 to 1.92)          | 0.27<br>(0.17 to 0.36)    |
| Comoros   | Diet low in fiber              | 0<br>(0 to 0)                   | 0.08<br>(0.03 to 0.23)          | 1<br>(0 to 1)                   | 0.12<br>(0.04 to 0.28)          | 1.46<br>(1.33 to 1.58)    |
| Comoros   | Diet low in<br>calcium         | 4<br>(3 to 6)                   | 2.09<br>(1.36 to 2.9)           | 11<br>(7 to 14)                 | 2.29<br>(1.55 to 3.08)          | 0.21<br>(0.11 to 0.31)    |
| Comoros   | Diet high in red<br>meat       | 0<br>(0 to 1)                   | 0.12<br>(0.02 to 0.33)          | 1<br>(0 to 1)                   | 0.12<br>(0.02 to 0.31)          | -0.03<br>(-0.17 to 0.1)   |
| Comoros   | Diet high in<br>processed meat | 0<br>(0 to 1)                   | 0.13<br>(0.02 to 0.26)          | 1<br>(0 to 1)                   | 0.14<br>(0.02 to 0.27)          | 0.16<br>(0.05 to 0.28)    |
| Comoros   | Diet low in<br>whole grains    | 2<br>(1 to 4)                   | 1.19<br>(0.44 to 1.79)          | 6<br>(2 to 9)                   | 1.33<br>(0.46 to 1.92)          | 0.27<br>(0.17 to 0.36)    |
| Congo     | All dietary risks              | 48<br>(31 to 66)                | 4.88<br>(3.34 to 6.56)          | 109<br>(76 to 148)              | 4.7<br>(3.38 to 6.15)           | -0.21<br>(-0.4 to -0.03)  |

| Countries    | Risk factors                | 1990                         |                              | 2019                         |                              | 1990-2019                 |
|--------------|-----------------------------|------------------------------|------------------------------|------------------------------|------------------------------|---------------------------|
|              |                             | Number of deaths<br>(95% UI) | ASDR per 100,000<br>(95% UI) | Number of deaths<br>(95% UI) | ASDR per 100,000<br>(95% UI) | EAPC of ASDR<br>(95% CI)  |
| Congo        | Diet low in milk            | 17<br>(7 to 27)              | 1.75<br>(0.68 to 2.63)       | 40<br>(14 to 59)             | 1.7<br>(0.62 to 2.48)        | -0.21<br>(-0.38 to -0.03) |
| Congo        | Diet low in fiber           | 3<br>(1 to 6)                | 0.3<br>(0.1 to 0.65)         | 8<br>(3 to 15)               | 0.34<br>(0.12 to 0.67)       | 0.26<br>(0.13 to 0.39)    |
| Congo        | Diet low in calcium         | 31<br>(19 to 44)             | 3.18<br>(2.1 to 4.41)        | 69<br>(48 to 96)             | 2.99<br>(2.15 to 4.01)       | -0.31<br>(-0.51 to -0.11) |
| Congo        | Diet high in red meat       | 2<br>(0 to 7)                | 0.24<br>(0.02 to 0.68)       | 6<br>(0 to 18)               | 0.25<br>(0.02 to 0.71)       | 0.3<br>(0.09 to 0.52)     |
| Congo        | Diet high in processed meat | 2<br>(0 to 4)                | 0.17<br>(0.03 to 0.35)       | 4<br>(1 to 9)                | 0.17<br>(0.02 to 0.33)       | -0.05<br>(-0.23 to 0.13)  |
| Congo        | Diet low in whole grains    | 17<br>(7 to 27)              | 1.75<br>(0.68 to 2.63)       | 40<br>(14 to 59)             | 1.7<br>(0.62 to 2.48)        | -0.21<br>(-0.38 to -0.03) |
| Cook Islands | All dietary risks           | 0<br>(0 to 0)                | 3.05<br>(2.29 to 3.8)        | 1<br>(0 to 1)                | 2.58<br>(1.8 to 3.37)        | -0.66<br>(-0.87 to -0.45) |
| Cook Islands | Diet low in milk            | 0<br>(0 to 0)                | 1.37<br>(0.52 to 1.88)       | 0<br>(0 to 0)                | 1.25<br>(0.45 to 1.73)       | -0.42<br>(-0.64 to -0.21) |
| Cook Islands | Diet low in fiber           | 0<br>(0 to 0)                | 0.02<br>(0.02 to 0.03)       | 0<br>(0 to 0)                | 0.02<br>(0.01 to 0.02)       | -0.68<br>(-0.91 to -0.45) |
| Cook Islands | Diet low in calcium         | 0<br>(0 to 0)                | 1.73<br>(1.29 to 2.23)       | 0<br>(0 to 0)                | 1.29<br>(0.89 to 1.79)       | -1.05<br>(-1.26 to -0.84) |
| Cook Islands | Diet high in red meat       | 0<br>(0 to 0)                | 0.26<br>(0.03 to 0.67)       | 0<br>(0 to 0)                | 0.27<br>(0.03 to 0.68)       | -0.13<br>(-0.35 to 0.09)  |
| Cook Islands | Diet high in processed meat | 0<br>(0 to 0)                | 0.07<br>(0.02 to 0.14)       | 0<br>(0 to 0)                | 0.08<br>(0.02 to 0.14)       | 0.03<br>(-0.19 to 0.24)   |
| Cook Islands | Diet low in whole grains    | 0<br>(0 to 0)                | 1.37<br>(0.52 to 1.88)       | 0<br>(0 to 0)                | 1.25<br>(0.45 to 1.73)       | -0.42<br>(-0.64 to -0.21) |
| Costa Rica   | All dietary risks           | 54<br>(39 to 66)             | 3.19<br>(2.3 to 3.94)        | 237<br>(151 to 323)          | 4.63<br>(2.96 to 6.31)       | 1.43<br>(1.3 to 1.55)     |
| Costa Rica   | Diet low in milk            | 26<br>(10 to 34)             | 1.56<br>(0.59 to 2.04)       | 128<br>(49 to 181)           | 2.51<br>(0.95 to 3.53)       | 1.76<br>(1.64 to 1.89)    |
| Costa Rica   | Diet low in fiber           | 6<br>(2 to 11)               | 0.36<br>(0.14 to 0.65)       | 26<br>(9 to 51)              | 0.51<br>(0.18 to 1)          | 1.38<br>(1.21 to 1.55)    |
| Costa Rica   | Diet low in calcium         | 22<br>(14 to 31)             | 1.29<br>(0.84 to 1.84)       | 77<br>(42 to 128)            | 1.52<br>(0.82 to 2.51)       | 0.74<br>(0.58 to 0.89)    |
| Costa Rica   | Diet high in red meat       | 5<br>(0 to 13)               | 0.29<br>(0.03 to 0.78)       | 23<br>(2 to 63)              | 0.44<br>(0.04 to 1.23)       | 1.48<br>(1.32 to 1.64)    |

| Countries     | Risk factors                | 1990                         |                              | 2019                         |                              | 1990-2019                 |
|---------------|-----------------------------|------------------------------|------------------------------|------------------------------|------------------------------|---------------------------|
|               |                             | Number of deaths<br>(95% UI) | ASDR per 100,000<br>(95% UI) | Number of deaths<br>(95% UI) | ASDR per 100,000<br>(95% UI) | EAPC of ASDR<br>(95% CI)  |
| Costa Rica    | Diet high in processed meat | 2<br>(0 to 4)                | 0.13<br>(0.02 to 0.23)       | 11<br>(2 to 22)              | 0.21<br>(0.03 to 0.42)       | 1.97<br>(1.85 to 2.1)     |
| Costa Rica    | Diet low in whole grains    | 26<br>(10 to 34)             | 1.56<br>(0.59 to 2.04)       | 128<br>(49 to 181)           | 2.51<br>(0.95 to 3.53)       | 1.76<br>(1.64 to 1.89)    |
| Côte d'Ivoire | All dietary risks           | 124<br>(89 to 167)           | 3.63<br>(2.69 to 4.82)       | 334<br>(242 to 437)          | 3.73<br>(2.79 to 4.74)       | -0.14<br>(-0.25 to -0.04) |
| Côte d'Ivoire | Diet low in milk            | 49<br>(18 to 72)             | 1.44<br>(0.52 to 2.09)       | 134<br>(50 to 191)           | 1.49<br>(0.55 to 2.09)       | -0.12<br>(-0.23 to -0.01) |
| Côte d'Ivoire | Diet low in fiber           | 1<br>(1 to 1)                | 0.02<br>(0.02 to 0.04)       | 2<br>(1 to 3)                | 0.02<br>(0.02 to 0.03)       | -0.56<br>(-0.69 to -0.44) |
| Côte d'Ivoire | Diet low in calcium         | 77<br>(55 to 106)            | 2.28<br>(1.65 to 3.1)        | 204<br>(147 to 271)          | 2.3<br>(1.7 to 3.01)         | -0.21<br>(-0.32 to -0.1)  |
| Côte d'Ivoire | Diet high in red meat       | 7<br>(1 to 21)               | 0.21<br>(0.02 to 0.59)       | 19<br>(2 to 54)              | 0.21<br>(0.02 to 0.58)       | -0.17<br>(-0.25 to -0.08) |
| Côte d'Ivoire | Diet high in processed meat | 8<br>(1 to 15)               | 0.22<br>(0.03 to 0.42)       | 24<br>(3 to 44)              | 0.24<br>(0.03 to 0.45)       | 0.15<br>(0.06 to 0.25)    |
| Côte d'Ivoire | Diet low in whole grains    | 49<br>(18 to 72)             | 1.44<br>(0.52 to 2.09)       | 134<br>(50 to 191)           | 1.49<br>(0.55 to 2.09)       | -0.12<br>(-0.23 to -0.01) |
| Croatia       | All dietary risks           | 406<br>(268 to 510)          | 6.67<br>(4.4 to 8.36)        | 647<br>(411 to 879)          | 7.06<br>(4.46 to 9.64)       | 0.44<br>(0.27 to 0.62)    |
| Croatia       | Diet low in milk            | 230<br>(85 to 299)           | 3.76<br>(1.39 to 4.88)       | 376<br>(137 to 526)          | 4.11<br>(1.5 to 5.74)        | 0.66<br>(0.47 to 0.85)    |
| Croatia       | Diet low in fiber           | 41<br>(14 to 78)             | 0.68<br>(0.23 to 1.29)       | 70<br>(24 to 140)            | 0.75<br>(0.25 to 1.51)       | 0.53<br>(0.34 to 0.72)    |
| Croatia       | Diet low in calcium         | 128<br>(70 to 207)           | 2.12<br>(1.16 to 3.41)       | 165<br>(76 to 289)           | 1.77<br>(0.81 to 3.11)       | -0.8<br>(-0.99 to -0.61)  |
| Croatia       | Diet high in red meat       | 38<br>(3 to 103)             | 0.62<br>(0.05 to 1.68)       | 79<br>(8 to 211)             | 0.88<br>(0.1 to 2.34)        | 2.01<br>(1.65 to 2.37)    |
| Croatia       | Diet high in processed meat | 15<br>(3 to 28)              | 0.25<br>(0.05 to 0.45)       | 26<br>(5 to 50)              | 0.29<br>(0.05 to 0.56)       | 0.99<br>(0.69 to 1.28)    |
| Croatia       | Diet low in whole grains    | 230<br>(85 to 299)           | 3.76<br>(1.39 to 4.88)       | 376<br>(137 to 526)          | 4.11<br>(1.5 to 5.74)        | 0.66<br>(0.47 to 0.85)    |
| Cuba          | All dietary risks           | 510<br>(367 to 622)          | 5.04<br>(3.61 to 6.15)       | 996<br>(663 to 1340)         | 5.09<br>(3.4 to 6.86)        | -0.22<br>(-0.38 to -0.06) |
| Cuba          | Diet low in milk            | 254<br>(95 to 329)           | 2.51<br>(0.94 to 3.25)       | 534<br>(194 to 741)          | 2.73<br>(0.99 to 3.81)       | 0.19<br>(0.04 to 0.34)    |

| Countries | Risk factors                | 1990                         |                              | 2019                         |                              | 1990-2019                 |
|-----------|-----------------------------|------------------------------|------------------------------|------------------------------|------------------------------|---------------------------|
|           |                             | Number of deaths<br>(95% UI) | ASDR per 100,000<br>(95% UI) | Number of deaths<br>(95% UI) | ASDR per 100,000<br>(95% UI) | EAPC of ASDR<br>(95% CI)  |
| Cuba      | Diet low in fiber           | 44<br>(15 to 88)             | 0.43<br>(0.15 to 0.86)       | 16<br>(8 to 34)              | 0.08<br>(0.04 to 0.17)       | -6.9<br>(-7.85 to -5.93)  |
| Cuba      | Diet low in calcium         | 215<br>(142 to 305)          | 2.12<br>(1.4 to 3.02)        | 402<br>(237 to 624)          | 2.05<br>(1.2 to 3.19)        | -0.75<br>(-0.98 to -0.52) |
| Cuba      | Diet high in red meat       | 44<br>(4 to 121)             | 0.44<br>(0.04 to 1.19)       | 102<br>(9 to 276)            | 0.53<br>(0.04 to 1.43)       | 0.88<br>(0.64 to 1.12)    |
| Cuba      | Diet high in processed meat | 19<br>(3 to 35)              | 0.19<br>(0.03 to 0.34)       | 47<br>(8 to 88)              | 0.24<br>(0.04 to 0.46)       | 1.01<br>(0.88 to 1.15)    |
| Cuba      | Diet low in whole grains    | 254<br>(95 to 329)           | 2.51<br>(0.94 to 3.25)       | 534<br>(194 to 741)          | 2.73<br>(0.99 to 3.81)       | 0.19<br>(0.04 to 0.34)    |
| Cyprus    | All dietary risks           | 33<br>(24 to 42)             | 4.63<br>(3.34 to 5.86)       | 91<br>(64 to 116)            | 4.94<br>(3.47 to 6.29)       | 0.49<br>(0.26 to 0.72)    |
| Cyprus    | Diet low in milk            | 17<br>(7 to 23)              | 2.38<br>(0.95 to 3.14)       | 48<br>(19 to 63)             | 2.58<br>(1.02 to 3.43)       | 0.51<br>(0.29 to 0.74)    |
| Cyprus    | Diet low in fiber           | 3<br>(1 to 6)                | 0.44<br>(0.16 to 0.83)       | 10<br>(4 to 17)              | 0.55<br>(0.21 to 0.95)       | 1.19<br>(0.9 to 1.48)     |
| Cyprus    | Diet low in calcium         | 9<br>(5 to 15)               | 1.3<br>(0.72 to 2.07)        | 25<br>(14 to 42)             | 1.38<br>(0.75 to 2.24)       | 0.6<br>(0.35 to 0.86)     |
| Cyprus    | Diet high in red meat       | 5<br>(1 to 10)               | 0.65<br>(0.12 to 1.42)       | 11<br>(2 to 26)              | 0.59<br>(0.09 to 1.39)       | -0.22<br>(-0.5 to 0.06)   |
| Cyprus    | Diet high in processed meat | 4<br>(1 to 7)                | 0.58<br>(0.12 to 0.94)       | 11<br>(2 to 18)              | 0.6<br>(0.12 to 0.99)        | 0.28<br>(0.08 to 0.47)    |
| Cyprus    | Diet low in whole grains    | 17<br>(7 to 23)              | 2.38<br>(0.95 to 3.14)       | 48<br>(19 to 63)             | 2.58<br>(1.02 to 3.43)       | 0.51<br>(0.29 to 0.74)    |
| Czechia   | All dietary risks           | 1364<br>(962 to 1733)        | 9.93<br>(7.01 to 12.63)      | 1334<br>(883 to 1812)        | 6.17<br>(4.1 to 8.38)        | -1.77<br>(-1.95 to -1.59) |
| Czechia   | Diet low in milk            | 648<br>(245 to 895)          | 4.71<br>(1.79 to 6.51)       | 667<br>(246 to 953)          | 3.08<br>(1.14 to 4.4)        | -1.58<br>(-1.76 to -1.4)  |
| Czechia   | Diet low in fiber           | 109<br>(37 to 226)           | 0.8<br>(0.27 to 1.64)        | 114<br>(38 to 238)           | 0.52<br>(0.18 to 1.1)        | -1.46<br>(-1.77 to -1.15) |
| Czechia   | Diet low in calcium         | 327<br>(164 to 573)          | 2.37<br>(1.19 to 4.17)       | 298<br>(135 to 531)          | 1.36<br>(0.61 to 2.42)       | -1.98<br>(-2.2 to -1.76)  |
| Czechia   | Diet high in red meat       | 275<br>(62 to 544)           | 2.01<br>(0.45 to 3.94)       | 230<br>(41 to 503)           | 1.09<br>(0.21 to 2.34)       | -2.46<br>(-2.62 to -2.29) |
| Czechia   | Diet high in processed meat | 181<br>(32 to 298)           | 1.32<br>(0.24 to 2.15)       | 189<br>(37 to 323)           | 0.88<br>(0.18 to 1.5)        | -1.49<br>(-1.68 to -1.31) |

| Countries                             | Risk factors                | 1990                         |                              | 2019                         |                              | 1990-2019                 |
|---------------------------------------|-----------------------------|------------------------------|------------------------------|------------------------------|------------------------------|---------------------------|
|                                       |                             | Number of deaths<br>(95% UI) | ASDR per 100,000<br>(95% UI) | Number of deaths<br>(95% UI) | ASDR per 100,000<br>(95% UI) | EAPC of ASDR<br>(95% CI)  |
| Czechia                               | Diet low in whole grains    | 648<br>(245 to 895)          | 4.71<br>(1.79 to 6.51)       | 667<br>(246 to 953)          | 3.08<br>(1.14 to 4.4)        | -1.58<br>(-1.76 to -1.4)  |
| Democratic People's Republic of Korea | All dietary risks           | 605<br>(435 to 818)          | 3.94<br>(2.9 to 5.18)        | 1354<br>(966 to 1786)        | 4.28<br>(3.01 to 5.61)       | 0.42<br>(0.35 to 0.48)    |
| Democratic People's Republic of Korea | Diet low in milk            | 231<br>(84 to 346)           | 1.49<br>(0.55 to 2.21)       | 498<br>(180 to 730)          | 1.57<br>(0.57 to 2.29)       | 0.31<br>(0.25 to 0.38)    |
| Democratic People's Republic of Korea | Diet low in fiber           | 27<br>(9 to 63)              | 0.19<br>(0.06 to 0.42)       | 85<br>(29 to 180)            | 0.27<br>(0.09 to 0.57)       | 1.51<br>(1.36 to 1.66)    |
| Democratic People's Republic of Korea | Diet low in calcium         | 378<br>(273 to 513)          | 2.48<br>(1.83 to 3.3)        | 866<br>(610 to 1176)         | 2.74<br>(1.91 to 3.69)       | 0.47<br>(0.4 to 0.53)     |
| Democratic People's Republic of Korea | Diet high in red meat       | 33<br>(3 to 89)              | 0.21<br>(0.02 to 0.56)       | 65<br>(7 to 181)             | 0.21<br>(0.02 to 0.57)       | 0.16<br>(0.04 to 0.29)    |
| Democratic People's Republic of Korea | Diet high in processed meat | 16<br>(3 to 31)              | 0.1<br>(0.02 to 0.19)        | 34<br>(7 to 66)              | 0.11<br>(0.02 to 0.2)        | 0.37<br>(0.28 to 0.46)    |
| Democratic People's Republic of Korea | Diet low in whole grains    | 231<br>(84 to 346)           | 1.49<br>(0.55 to 2.21)       | 498<br>(180 to 730)          | 1.57<br>(0.57 to 2.29)       | 0.31<br>(0.25 to 0.38)    |
| Democratic Republic of the Congo      | All dietary risks           | 358<br>(266 to 480)          | 2.63<br>(1.93 to 3.67)       | 806<br>(528 to 1210)         | 2.53<br>(1.62 to 3.92)       | -0.27<br>(-0.53 to -0.01) |
| Democratic Republic of the Congo      | Diet low in milk            | 130<br>(50 to 200)           | 0.95<br>(0.36 to 1.48)       | 292<br>(99 to 480)           | 0.92<br>(0.3 to 1.56)        | -0.3<br>(-0.56 to -0.03)  |
| Democratic Republic of the Congo      | Diet low in fiber           | 5<br>(2 to 13)               | 0.05<br>(0.02 to 0.11)       | 39<br>(12 to 88)             | 0.13<br>(0.04 to 0.29)       | 3.55<br>(2.91 to 4.18)    |
| Democratic Republic of the Congo      | Diet low in calcium         | 241<br>(174 to 333)          | 1.78<br>(1.25 to 2.55)       | 541<br>(340 to 827)          | 1.71<br>(1.06 to 2.68)       | -0.31<br>(-0.57 to -0.04) |
| Democratic Republic of the Congo      | Diet high in red meat       | 11<br>(2 to 26)              | 0.08<br>(0.01 to 0.19)       | 18<br>(4 to 46)              | 0.06<br>(0.01 to 0.14)       | -1.24<br>(-1.77 to -0.71) |

| Countries                        | Risk factors                | 1990                         |                              | 2019                         |                              | 1990-2019                 |
|----------------------------------|-----------------------------|------------------------------|------------------------------|------------------------------|------------------------------|---------------------------|
|                                  |                             | Number of deaths<br>(95% UI) | ASDR per 100,000<br>(95% UI) | Number of deaths<br>(95% UI) | ASDR per 100,000<br>(95% UI) | EAPC of ASDR<br>(95% CI)  |
| Democratic Republic of the Congo | Diet high in processed meat | 16<br>(2 to 32)              | 0.11<br>(0.02 to 0.21)       | 29<br>(4 to 62)              | 0.09<br>(0.01 to 0.19)       | -0.99<br>(-1.43 to -0.54) |
| Democratic Republic of the Congo | Diet low in whole grains    | 130<br>(50 to 200)           | 0.95<br>(0.36 to 1.48)       | 292<br>(99 to 480)           | 0.92<br>(0.3 to 1.56)        | -0.3<br>(-0.56 to -0.03)  |
| Denmark                          | All dietary risks           | 641<br>(467 to 801)          | 7.68<br>(5.61 to 9.57)       | 826<br>(579 to 1039)         | 6.8<br>(4.79 to 8.56)        | -0.83<br>(-1.04 to -0.61) |
| Denmark                          | Diet low in milk            | 296<br>(113 to 396)          | 3.53<br>(1.35 to 4.72)       | 446<br>(168 to 583)          | 3.66<br>(1.38 to 4.77)       | -0.19<br>(-0.46 to 0.07)  |
| Denmark                          | Diet low in fiber           | 42<br>(14 to 91)             | 0.49<br>(0.17 to 1.07)       | 45<br>(15 to 105)            | 0.36<br>(0.12 to 0.84)       | -1.47<br>(-1.65 to -1.29) |
| Denmark                          | Diet low in calcium         | 124<br>(60 to 217)           | 1.45<br>(0.7 to 2.52)        | 106<br>(49 to 183)           | 0.84<br>(0.38 to 1.44)       | -2.4<br>(-2.63 to -2.17)  |
| Denmark                          | Diet high in red meat       | 150<br>(42 to 265)           | 1.86<br>(0.53 to 3.22)       | 175<br>(44 to 328)           | 1.48<br>(0.38 to 2.72)       | -1.38<br>(-1.61 to -1.15) |
| Denmark                          | Diet high in processed meat | 119<br>(34 to 180)           | 1.44<br>(0.42 to 2.18)       | 162<br>(51 to 248)           | 1.34<br>(0.42 to 2.05)       | -0.63<br>(-0.88 to -0.38) |
| Denmark                          | Diet low in whole grains    | 296<br>(113 to 396)          | 3.53<br>(1.35 to 4.72)       | 446<br>(168 to 583)          | 3.66<br>(1.38 to 4.77)       | -0.19<br>(-0.46 to 0.07)  |
| Djibouti                         | All dietary risks           | 5<br>(3 to 7)                | 3.9<br>(2.71 to 5.35)        | 23<br>(16 to 33)             | 4.41<br>(3.17 to 6)          | 0.37<br>(0.32 to 0.42)    |
| Djibouti                         | Diet low in milk            | 2<br>(1 to 3)                | 1.54<br>(0.58 to 2.23)       | 10<br>(4 to 16)              | 1.91<br>(0.7 to 2.79)        | 0.76<br>(0.71 to 0.81)    |
| Djibouti                         | Diet low in fiber           | 1<br>(0 to 1)                | 0.62<br>(0.28 to 1.03)       | 2<br>(1 to 4)                | 0.39<br>(0.13 to 0.71)       | -2.14<br>(-2.32 to -1.96) |
| Djibouti                         | Diet low in calcium         | 3<br>(2 to 4)                | 2.14<br>(1.47 to 2.98)       | 12<br>(8 to 18)              | 2.37<br>(1.72 to 3.25)       | 0.27<br>(0.22 to 0.32)    |
| Djibouti                         | Diet high in red meat       | 0<br>(0 to 1)                | 0.22<br>(0.02 to 0.62)       | 2<br>(0 to 5)                | 0.29<br>(0.02 to 0.84)       | 1.16<br>(1.08 to 1.24)    |
| Djibouti                         | Diet high in processed meat | 0<br>(0 to 0)                | 0.11<br>(0.02 to 0.24)       | 1<br>(0 to 2)                | 0.16<br>(0.02 to 0.32)       | 1.4<br>(1.31 to 1.48)     |
| Djibouti                         | Diet low in whole grains    | 2<br>(1 to 3)                | 1.54<br>(0.58 to 2.23)       | 10<br>(4 to 16)              | 1.91<br>(0.7 to 2.79)        | 0.76<br>(0.71 to 0.81)    |
| Dominica                         | All dietary risks           | 3<br>(2 to 3)                | 3.81<br>(2.58 to 4.8)        | 4<br>(3 to 5)                | 4.43<br>(2.8 to 5.91)        | 0.74<br>(0.67 to 0.82)    |

| Countries          | Risk factors                | 1990                         |                              | 2019                         |                              | 1990-2019                 |
|--------------------|-----------------------------|------------------------------|------------------------------|------------------------------|------------------------------|---------------------------|
|                    |                             | Number of deaths<br>(95% UI) | ASDR per 100,000<br>(95% UI) | Number of deaths<br>(95% UI) | ASDR per 100,000<br>(95% UI) | EAPC of ASDR<br>(95% CI)  |
| Dominica           | Diet low in milk            | 2<br>(1 to 2)                | 2.54<br>(1.25 to 3.21)       | 3<br>(1 to 4)                | 3.17<br>(1.54 to 4.26)       | 0.97<br>(0.9 to 1.04)     |
| Dominica           | Diet low in fiber           | 0<br>(0 to 0)                | 0.08<br>(0.03 to 0.2)        | 0<br>(0 to 0)                | 0.06<br>(0.03 to 0.13)       | -0.91<br>(-1.31 to -0.51) |
| Dominica           | Diet low in calcium         | 1<br>(0 to 1)                | 1.13<br>(0.6 to 1.89)        | 1<br>(0 to 2)                | 1.02<br>(0.44 to 1.9)        | -0.18<br>(-0.42 to 0.06)  |
| Dominica           | Diet high in red meat       | 0<br>(0 to 1)                | 0.31<br>(0.03 to 0.84)       | 0<br>(0 to 1)                | 0.4<br>(0.03 to 1.13)        | 1.06<br>(0.97 to 1.14)    |
| Dominica           | Diet high in processed meat | 0<br>(0 to 0)                | 0.14<br>(0.03 to 0.26)       | 0<br>(0 to 0)                | 0.18<br>(0.03 to 0.35)       | 1.11<br>(1.03 to 1.19)    |
| Dominica           | Diet low in whole grains    | 2<br>(1 to 2)                | 2.54<br>(1.25 to 3.21)       | 3<br>(1 to 4)                | 3.17<br>(1.54 to 4.26)       | 0.97<br>(0.9 to 1.04)     |
| Dominican Republic | All dietary risks           | 98<br>(77 to 118)            | 2.9<br>(2.28 to 3.5)         | 389<br>(263 to 531)          | 4.34<br>(2.94 to 5.92)       | 2.01<br>(1.83 to 2.19)    |
| Dominican Republic | Diet low in milk            | 40<br>(15 to 54)             | 1.19<br>(0.45 to 1.58)       | 168<br>(62 to 247)           | 1.87<br>(0.69 to 2.76)       | 2.22<br>(2.01 to 2.43)    |
| Dominican Republic | Diet low in fiber           | 9<br>(3 to 17)               | 0.28<br>(0.11 to 0.5)        | 27<br>(9 to 59)              | 0.31<br>(0.11 to 0.66)       | 0.67<br>(0.47 to 0.86)    |
| Dominican Republic | Diet low in calcium         | 55<br>(42 to 69)             | 1.63<br>(1.25 to 2.07)       | 205<br>(134 to 288)          | 2.3<br>(1.51 to 3.2)         | 1.78<br>(1.6 to 1.97)     |
| Dominican Republic | Diet high in red meat       | 6<br>(1 to 15)               | 0.16<br>(0.02 to 0.43)       | 28<br>(2 to 79)              | 0.31<br>(0.03 to 0.86)       | 2.93<br>(2.73 to 3.14)    |
| Dominican Republic | Diet high in processed meat | 3<br>(1 to 5)                | 0.08<br>(0.02 to 0.14)       | 13<br>(2 to 27)              | 0.15<br>(0.03 to 0.29)       | 2.9<br>(2.66 to 3.15)     |
| Dominican Republic | Diet low in whole grains    | 40<br>(15 to 54)             | 1.19<br>(0.45 to 1.58)       | 168<br>(62 to 247)           | 1.87<br>(0.69 to 2.76)       | 2.22<br>(2.01 to 2.43)    |
| Ecuador            | All dietary risks           | 132<br>(101 to 156)          | 2.67<br>(2.06 to 3.18)       | 577<br>(415 to 771)          | 4.09<br>(2.97 to 5.43)       | 2.1<br>(1.77 to 2.43)     |
| Ecuador            | Diet low in milk            | 59<br>(22 to 77)             | 1.19<br>(0.45 to 1.55)       | 251<br>(89 to 359)           | 1.78<br>(0.64 to 2.54)       | 1.97<br>(1.66 to 2.28)    |
| Ecuador            | Diet low in fiber           | 14<br>(5 to 25)              | 0.28<br>(0.11 to 0.5)        | 75<br>(29 to 125)            | 0.53<br>(0.2 to 0.89)        | 2.9<br>(2.48 to 3.32)     |
| Ecuador            | Diet low in calcium         | 66<br>(49 to 85)             | 1.34<br>(1 to 1.73)          | 269<br>(182 to 376)          | 1.92<br>(1.32 to 2.67)       | 1.89<br>(1.55 to 2.24)    |
| Ecuador            | Diet high in red meat       | 9<br>(1 to 26)               | 0.19<br>(0.02 to 0.51)       | 54<br>(6 to 143)             | 0.38<br>(0.04 to 0.99)       | 3.06<br>(2.74 to 3.38)    |



| Countries         | Risk factors                | 1990                         |                              | 2019                         |                              | 1990-2019                 |
|-------------------|-----------------------------|------------------------------|------------------------------|------------------------------|------------------------------|---------------------------|
|                   |                             | Number of deaths<br>(95% UI) | ASDR per 100,000<br>(95% UI) | Number of deaths<br>(95% UI) | ASDR per 100,000<br>(95% UI) | EAPC of ASDR<br>(95% CI)  |
| Ecuador           | Diet high in processed meat | 4<br>(1 to 6)                | 0.07<br>(0.02 to 0.11)       | 17<br>(5 to 32)              | 0.12<br>(0.03 to 0.21)       | 2.5<br>(2.18 to 2.81)     |
| Ecuador           | Diet low in whole grains    | 59<br>(22 to 77)             | 1.19<br>(0.45 to 1.55)       | 251<br>(89 to 359)           | 1.78<br>(0.64 to 2.54)       | 1.97<br>(1.66 to 2.28)    |
| Egypt             | All dietary risks           | 551<br>(429 to 646)          | 1.97<br>(1.53 to 2.3)        | 1385<br>(870 to 2004)        | 2.29<br>(1.49 to 3.24)       | 0.52<br>(0.41 to 0.63)    |
| Egypt             | Diet low in milk            | 246<br>(91 to 320)           | 0.87<br>(0.32 to 1.14)       | 708<br>(248 to 1083)         | 1.16<br>(0.41 to 1.76)       | 1.03<br>(0.95 to 1.11)    |
| Egypt             | Diet low in fiber           | 5<br>(3 to 11)               | 0.02<br>(0.01 to 0.04)       | 12<br>(8 to 19)              | 0.02<br>(0.01 to 0.03)       | -0.02<br>(-0.28 to 0.24)  |
| Egypt             | Diet low in calcium         | 323<br>(260 to 402)          | 1.16<br>(0.93 to 1.43)       | 643<br>(396 to 984)          | 1.09<br>(0.68 to 1.66)       | -0.32<br>(-0.48 to -0.17) |
| Egypt             | Diet high in red meat       | 33<br>(3 to 88)              | 0.11<br>(0.01 to 0.3)        | 112<br>(9 to 330)            | 0.18<br>(0.02 to 0.51)       | 1.64<br>(1.57 to 1.71)    |
| Egypt             | Diet high in processed meat | 15<br>(3 to 26)              | 0.05<br>(0.01 to 0.09)       | 64<br>(9 to 134)             | 0.1<br>(0.02 to 0.21)        | 2.57<br>(2.47 to 2.68)    |
| Egypt             | Diet low in whole grains    | 246<br>(91 to 320)           | 0.87<br>(0.32 to 1.14)       | 708<br>(248 to 1083)         | 1.16<br>(0.41 to 1.76)       | 1.03<br>(0.95 to 1.11)    |
| El Salvador       | All dietary risks           | 49<br>(38 to 57)             | 1.67<br>(1.31 to 1.98)       | 165<br>(109 to 226)          | 2.7<br>(1.77 to 3.7)         | 1.47<br>(1.2 to 1.74)     |
| El Salvador       | Diet low in milk            | 20<br>(8 to 27)              | 0.7<br>(0.26 to 0.94)        | 80<br>(30 to 117)            | 1.32<br>(0.49 to 1.93)       | 2.09<br>(1.77 to 2.41)    |
| El Salvador       | Diet low in fiber           | 1<br>(0 to 2)                | 0.03<br>(0.01 to 0.07)       | 3<br>(1 to 7)                | 0.05<br>(0.02 to 0.11)       | 1.88<br>(1.69 to 2.07)    |
| El Salvador       | Diet low in calcium         | 30<br>(24 to 37)             | 1.02<br>(0.82 to 1.28)       | 83<br>(52 to 120)            | 1.34<br>(0.84 to 1.97)       | 0.68<br>(0.44 to 0.91)    |
| El Salvador       | Diet high in red meat       | 2<br>(0 to 5)                | 0.07<br>(0.01 to 0.17)       | 10<br>(1 to 26)              | 0.16<br>(0.02 to 0.43)       | 2.7<br>(2.26 to 3.15)     |
| El Salvador       | Diet high in processed meat | 2<br>(0 to 3)                | 0.06<br>(0.01 to 0.1)        | 7<br>(1 to 14)               | 0.12<br>(0.02 to 0.24)       | 2.38<br>(2.03 to 2.73)    |
| El Salvador       | Diet low in whole grains    | 20<br>(8 to 27)              | 0.7<br>(0.26 to 0.94)        | 80<br>(30 to 117)            | 1.32<br>(0.49 to 1.93)       | 2.09<br>(1.77 to 2.41)    |
| Equatorial Guinea | All dietary risks           | 5<br>(3 to 7)                | 2.7<br>(1.8 to 3.71)         | 21<br>(12 to 31)             | 4.93<br>(3.03 to 7.14)       | 2.62<br>(2.43 to 2.8)     |
| Equatorial Guinea | Diet low in milk            | 2<br>(1 to 3)                | 1.01<br>(0.39 to 1.49)       | 8<br>(3 to 14)               | 2<br>(0.71 to 3.21)          | 3.05<br>(2.82 to 3.28)    |

| Countries         | Risk factors                | 1990                         |                              | 2019                         |                              | 1990-2019                 |
|-------------------|-----------------------------|------------------------------|------------------------------|------------------------------|------------------------------|---------------------------|
|                   |                             | Number of deaths<br>(95% UI) | ASDR per 100,000<br>(95% UI) | Number of deaths<br>(95% UI) | ASDR per 100,000<br>(95% UI) | EAPC of ASDR<br>(95% CI)  |
| Equatorial Guinea | Diet low in fiber           | 0<br>(0 to 1)                | 0.14<br>(0.04 to 0.32)       | 0<br>(0 to 1)                | 0.07<br>(0.03 to 0.16)       | -3.81<br>(-4.43 to -3.18) |
| Equatorial Guinea | Diet low in calcium         | 3<br>(2 to 5)                | 1.74<br>(1.15 to 2.42)       | 12<br>(7 to 18)              | 2.85<br>(1.77 to 4.21)       | 2.03<br>(1.9 to 2.16)     |
| Equatorial Guinea | Diet high in red meat       | 0<br>(0 to 1)                | 0.14<br>(0.01 to 0.41)       | 2<br>(0 to 5)                | 0.39<br>(0.03 to 1.13)       | 4.71<br>(4.27 to 5.14)    |
| Equatorial Guinea | Diet high in processed meat | 0<br>(0 to 0)                | 0.09<br>(0.01 to 0.18)       | 1<br>(0 to 3)                | 0.26<br>(0.03 to 0.55)       | 5<br>(4.51 to 5.48)       |
| Equatorial Guinea | Diet low in whole grains    | 2<br>(1 to 3)                | 1.01<br>(0.39 to 1.49)       | 8<br>(3 to 14)               | 2<br>(0.71 to 3.21)          | 3.05<br>(2.82 to 3.28)    |
| Eritrea           | All dietary risks           | 24<br>(17 to 34)             | 2.59<br>(1.83 to 3.6)        | 95<br>(68 to 127)            | 3.85<br>(2.85 to 5.09)       | 1.12<br>(0.85 to 1.38)    |
| Eritrea           | Diet low in milk            | 9<br>(4 to 14)               | 0.98<br>(0.38 to 1.52)       | 37<br>(13 to 55)             | 1.49<br>(0.54 to 2.17)       | 1.19<br>(0.92 to 1.47)    |
| Eritrea           | Diet low in fiber           | 1<br>(0 to 2)                | 0.07<br>(0.02 to 0.17)       | 2<br>(1 to 4)                | 0.07<br>(0.03 to 0.17)       | 0.3<br>(0.26 to 0.35)     |
| Eritrea           | Diet low in calcium         | 16<br>(11 to 23)             | 1.7<br>(1.15 to 2.4)         | 61<br>(44 to 82)             | 2.48<br>(1.84 to 3.3)        | 1.06<br>(0.8 to 1.32)     |
| Eritrea           | Diet high in red meat       | 1<br>(0 to 3)                | 0.11<br>(0.01 to 0.31)       | 5<br>(0 to 12)               | 0.18<br>(0.02 to 0.48)       | 1.31<br>(0.99 to 1.64)    |
| Eritrea           | Diet high in processed meat | 1<br>(0 to 2)                | 0.09<br>(0.01 to 0.19)       | 4<br>(1 to 8)                | 0.15<br>(0.02 to 0.3)        | 1.39<br>(1.06 to 1.72)    |
| Eritrea           | Diet low in whole grains    | 9<br>(4 to 14)               | 0.98<br>(0.38 to 1.52)       | 37<br>(13 to 55)             | 1.49<br>(0.54 to 2.17)       | 1.19<br>(0.92 to 1.47)    |
| Estonia           | All dietary risks           | 122<br>(84 to 152)           | 5.97<br>(4.11 to 7.47)       | 150<br>(96 to 205)           | 5.25<br>(3.41 to 7.15)       | -0.44<br>(-0.64 to -0.24) |
| Estonia           | Diet low in milk            | 71<br>(27 to 90)             | 3.45<br>(1.35 to 4.42)       | 84<br>(31 to 117)            | 2.95<br>(1.08 to 4.1)        | -0.54<br>(-0.74 to -0.35) |
| Estonia           | Diet low in fiber           | 4<br>(1 to 11)               | 0.22<br>(0.07 to 0.54)       | 4<br>(2 to 10)               | 0.14<br>(0.05 to 0.34)       | -1.91<br>(-2.15 to -1.67) |
| Estonia           | Diet low in calcium         | 16<br>(7 to 27)              | 0.78<br>(0.36 to 1.34)       | 18<br>(8 to 32)              | 0.62<br>(0.27 to 1.1)        | -0.97<br>(-1.2 to -0.73)  |
| Estonia           | Diet high in red meat       | 15<br>(2 to 37)              | 0.75<br>(0.09 to 1.8)        | 19<br>(2 to 49)              | 0.7<br>(0.08 to 1.76)        | -0.16<br>(-0.42 to 0.11)  |
| Estonia           | Diet high in processed meat | 30<br>(11 to 51)             | 1.49<br>(0.56 to 2.53)       | 40<br>(15 to 68)             | 1.42<br>(0.53 to 2.46)       | -0.09<br>(-0.31 to 0.14)  |

| Countries | Risk factors                | 1990                         |                              | 2019                         |                              | 1990-2019                 |
|-----------|-----------------------------|------------------------------|------------------------------|------------------------------|------------------------------|---------------------------|
|           |                             | Number of deaths<br>(95% UI) | ASDR per 100,000<br>(95% UI) | Number of deaths<br>(95% UI) | ASDR per 100,000<br>(95% UI) | EAPC of ASDR<br>(95% CI)  |
| Estonia   | Diet low in whole grains    | 71<br>(27 to 90)             | 3.45<br>(1.35 to 4.42)       | 84<br>(31 to 117)            | 2.95<br>(1.08 to 4.1)        | -0.54<br>(-0.74 to -0.35) |
| Eswatini  | All dietary risks           | 10<br>(7 to 13)              | 3.89<br>(2.81 to 5.16)       | 25<br>(16 to 35)             | 4.89<br>(3.17 to 6.8)        | 0.89<br>(0.57 to 1.22)    |
| Eswatini  | Diet low in milk            | 4<br>(1 to 6)                | 1.43<br>(0.54 to 2.18)       | 9<br>(3 to 14)               | 1.72<br>(0.62 to 2.7)        | 0.78<br>(0.49 to 1.07)    |
| Eswatini  | Diet low in fiber           | 0<br>(0 to 1)                | 0.11<br>(0.04 to 0.27)       | 1<br>(0 to 2)                | 0.18<br>(0.06 to 0.44)       | 2.09<br>(1.62 to 2.56)    |
| Eswatini  | Diet low in calcium         | 6<br>(4 to 8)                | 2.43<br>(1.73 to 3.27)       | 15<br>(10 to 22)             | 3.06<br>(2.02 to 4.26)       | 0.87<br>(0.54 to 1.21)    |
| Eswatini  | Diet high in red meat       | 1<br>(0 to 2)                | 0.34<br>(0.03 to 0.92)       | 2<br>(0 to 6)                | 0.41<br>(0.03 to 1.14)       | 0.67<br>(0.38 to 0.97)    |
| Eswatini  | Diet high in processed meat | 0<br>(0 to 1)                | 0.12<br>(0.02 to 0.24)       | 1<br>(0 to 2)                | 0.16<br>(0.03 to 0.33)       | 1.17<br>(0.82 to 1.52)    |
| Eswatini  | Diet low in whole grains    | 4<br>(1 to 6)                | 1.43<br>(0.54 to 2.18)       | 9<br>(3 to 14)               | 1.72<br>(0.62 to 2.7)        | 0.78<br>(0.49 to 1.07)    |
| Ethiopia  | All dietary risks           | 583<br>(406 to 913)          | 3.07<br>(2.07 to 4.84)       | 1116<br>(774 to 1637)        | 2.89<br>(2.01 to 4.26)       | -0.33<br>(-0.56 to -0.1)  |
| Ethiopia  | Diet low in milk            | 240<br>(97 to 394)           | 1.26<br>(0.52 to 2.07)       | 472<br>(175 to 738)          | 1.22<br>(0.45 to 1.94)       | -0.22<br>(-0.45 to 0.01)  |
| Ethiopia  | Diet low in fiber           | 11<br>(4 to 28)              | 0.06<br>(0.02 to 0.15)       | 11<br>(6 to 23)              | 0.03<br>(0.02 to 0.06)       | -3.14<br>(-3.4 to -2.89)  |
| Ethiopia  | Diet low in calcium         | 376<br>(254 to 597)          | 1.99<br>(1.29 to 3.18)       | 697<br>(478 to 1055)         | 1.82<br>(1.25 to 2.77)       | -0.46<br>(-0.68 to -0.24) |
| Ethiopia  | Diet high in red meat       | 23<br>(3 to 66)              | 0.12<br>(0.01 to 0.33)       | 50<br>(5 to 143)             | 0.13<br>(0.01 to 0.36)       | 0.29<br>(0 to 0.57)       |
| Ethiopia  | Diet high in processed meat | 19<br>(3 to 40)              | 0.09<br>(0.02 to 0.2)        | 41<br>(7 to 87)              | 0.1<br>(0.02 to 0.21)        | 0.26<br>(-0.03 to 0.55)   |
| Ethiopia  | Diet low in whole grains    | 240<br>(97 to 394)           | 1.26<br>(0.52 to 2.07)       | 472<br>(175 to 738)          | 1.22<br>(0.45 to 1.94)       | -0.22<br>(-0.45 to 0.01)  |
| Fiji      | All dietary risks           | 11<br>(8 to 15)              | 3.6<br>(2.71 to 4.53)        | 27<br>(20 to 36)             | 4.27<br>(3.09 to 5.57)       | 0.76<br>(0.55 to 0.96)    |
| Fiji      | Diet low in milk            | 5<br>(2 to 7)                | 1.55<br>(0.58 to 2.12)       | 12<br>(4 to 17)              | 1.91<br>(0.71 to 2.68)       | 0.87<br>(0.69 to 1.04)    |

| Countries | Risk factors                | 1990                         |                              | 2019                         |                              | 1990-2019                 |
|-----------|-----------------------------|------------------------------|------------------------------|------------------------------|------------------------------|---------------------------|
|           |                             | Number of deaths<br>(95% UI) | ASDR per 100,000<br>(95% UI) | Number of deaths<br>(95% UI) | ASDR per 100,000<br>(95% UI) | EAPC of ASDR<br>(95% CI)  |
| Fiji      | Diet low in fiber           | 0<br>(0 to 1)                | 0.14<br>(0.05 to 0.33)       | 0<br>(0 to 1)                | 0.07<br>(0.03 to 0.17)       | -2.01<br>(-2.65 to -1.36) |
| Fiji      | Diet low in calcium         | 6<br>(5 to 8)                | 2.03<br>(1.54 to 2.62)       | 15<br>(11 to 20)             | 2.37<br>(1.74 to 3.16)       | 0.79<br>(0.58 to 1.01)    |
| Fiji      | Diet high in red meat       | 1<br>(0 to 3)                | 0.36<br>(0.04 to 0.9)        | 3<br>(0 to 7)                | 0.4<br>(0.04 to 1.06)        | 0.2<br>(-0.01 to 0.41)    |
| Fiji      | Diet high in processed meat | 0<br>(0 to 0)                | 0.08<br>(0.02 to 0.14)       | 1<br>(0 to 1)                | 0.1<br>(0.03 to 0.19)        | 1.16<br>(1 to 1.32)       |
| Fiji      | Diet low in whole grains    | 5<br>(2 to 7)                | 1.55<br>(0.58 to 2.12)       | 12<br>(4 to 17)              | 1.91<br>(0.71 to 2.68)       | 0.87<br>(0.69 to 1.04)    |
| Finland   | All dietary risks           | 315<br>(222 to 393)          | 4.39<br>(3.1 to 5.48)        | 466<br>(316 to 592)          | 3.56<br>(2.44 to 4.52)       | -0.8<br>(-0.87 to -0.72)  |
| Finland   | Diet low in milk            | 169<br>(63 to 221)           | 2.35<br>(0.88 to 3.07)       | 260<br>(96 to 345)           | 1.98<br>(0.73 to 2.62)       | -0.64<br>(-0.71 to -0.57) |
| Finland   | Diet low in fiber           | 27<br>(10 to 56)             | 0.38<br>(0.13 to 0.77)       | 32<br>(11 to 67)             | 0.23<br>(0.08 to 0.49)       | -2.14<br>(-2.29 to -1.99) |
| Finland   | Diet low in calcium         | 39<br>(18 to 67)             | 0.54<br>(0.25 to 0.93)       | 53<br>(26 to 91)             | 0.38<br>(0.19 to 0.65)       | -1.44<br>(-1.58 to -1.3)  |
| Finland   | Diet high in red meat       | 64<br>(15 to 125)            | 0.91<br>(0.22 to 1.74)       | 87<br>(18 to 178)            | 0.69<br>(0.15 to 1.41)       | -0.93<br>(-1.22 to -0.63) |
| Finland   | Diet high in processed meat | 55<br>(14 to 85)             | 0.77<br>(0.2 to 1.19)        | 89<br>(26 to 138)            | 0.69<br>(0.2 to 1.06)        | -0.37<br>(-0.51 to -0.23) |
| Finland   | Diet low in whole grains    | 169<br>(63 to 221)           | 2.35<br>(0.88 to 3.07)       | 260<br>(96 to 345)           | 1.98<br>(0.73 to 2.62)       | -0.64<br>(-0.71 to -0.57) |
| France    | All dietary risks           | 7083<br>(5300 to 8567)       | 8.24<br>(6.17 to 9.94)       | 8886<br>(6399 to 10934)      | 5.76<br>(4.18 to 7.05)       | -1.38<br>(-1.44 to -1.32) |
| France    | Diet low in milk            | 3563<br>(1340 to 4615)       | 4.14<br>(1.55 to 5.35)       | 4591<br>(1795 to 6014)       | 2.97<br>(1.15 to 3.86)       | -1.31<br>(-1.38 to -1.24) |
| France    | Diet low in fiber           | 542<br>(196 to 1084)         | 0.62<br>(0.22 to 1.24)       | 682<br>(230 to 1384)         | 0.43<br>(0.15 to 0.87)       | -1.31<br>(-1.36 to -1.26) |
| France    | Diet low in calcium         | 912<br>(430 to 1590)         | 1.03<br>(0.48 to 1.79)       | 1344<br>(607 to 2431)        | 0.84<br>(0.38 to 1.51)       | -0.63<br>(-0.72 to -0.55) |
| France    | Diet high in red meat       | 1982<br>(719 to 3166)        | 2.35<br>(0.87 to 3.73)       | 2092<br>(651 to 3629)        | 1.41<br>(0.46 to 2.4)        | -2<br>(-2.12 to -1.88)    |

| Countries | Risk factors                | 1990                         |                              | 2019                         |                              | 1990-2019                 |
|-----------|-----------------------------|------------------------------|------------------------------|------------------------------|------------------------------|---------------------------|
|           |                             | Number of deaths<br>(95% UI) | ASDR per 100,000<br>(95% UI) | Number of deaths<br>(95% UI) | ASDR per 100,000<br>(95% UI) | EAPC of ASDR<br>(95% CI)  |
| France    | Diet high in processed meat | 1191<br>(358 to 1798)        | 1.4<br>(0.42 to 2.1)         | 1559<br>(482 to 2393)        | 1.02<br>(0.33 to 1.56)       | -1.22<br>(-1.29 to -1.15) |
| France    | Diet low in whole grains    | 3563<br>(1340 to 4615)       | 4.14<br>(1.55 to 5.35)       | 4591<br>(1795 to 6014)       | 2.97<br>(1.15 to 3.86)       | -1.31<br>(-1.38 to -1.24) |
| Gabon     | All dietary risks           | 31<br>(19 to 47)             | 5.87<br>(3.73 to 8.82)       | 54<br>(36 to 71)             | 5.65<br>(3.96 to 7.37)       | -0.28<br>(-0.34 to -0.21) |
| Gabon     | Diet low in milk            | 10<br>(4 to 18)              | 1.97<br>(0.71 to 3.32)       | 19<br>(7 to 29)              | 2.02<br>(0.74 to 3.02)       | -0.05<br>(-0.13 to 0.03)  |
| Gabon     | Diet low in fiber           | 1<br>(0 to 2)                | 0.16<br>(0.05 to 0.44)       | 1<br>(0 to 3)                | 0.13<br>(0.05 to 0.32)       | -0.89<br>(-1 to -0.79)    |
| Gabon     | Diet low in calcium         | 18<br>(12 to 28)             | 3.52<br>(2.27 to 5.37)       | 32<br>(22 to 43)             | 3.4<br>(2.37 to 4.47)        | -0.26<br>(-0.32 to -0.2)  |
| Gabon     | Diet high in red meat       | 5<br>(1 to 11)               | 0.98<br>(0.24 to 2.12)       | 7<br>(1 to 15)               | 0.69<br>(0.11 to 1.59)       | -1.49<br>(-1.73 to -1.24) |
| Gabon     | Diet high in processed meat | 1<br>(0 to 3)                | 0.23<br>(0.03 to 0.5)        | 2<br>(0 to 5)                | 0.25<br>(0.03 to 0.49)       | 0.19<br>(0.1 to 0.28)     |
| Gabon     | Diet low in whole grains    | 10<br>(4 to 18)              | 1.97<br>(0.71 to 3.32)       | 19<br>(7 to 29)              | 2.02<br>(0.74 to 3.02)       | -0.05<br>(-0.13 to 0.03)  |
| Gambia    | All dietary risks           | 6<br>(5 to 8)                | 2<br>(1.5 to 2.58)           | 23<br>(16 to 31)             | 2.58<br>(1.78 to 3.53)       | 0.67<br>(0.53 to 0.82)    |
| Gambia    | Diet low in milk            | 2<br>(1 to 3)                | 0.69<br>(0.25 to 1)          | 9<br>(3 to 13)               | 0.97<br>(0.36 to 1.47)       | 0.98<br>(0.82 to 1.15)    |
| Gambia    | Diet low in fiber           | 1<br>(0 to 1)                | 0.2<br>(0.07 to 0.36)        | 1<br>(0 to 2)                | 0.09<br>(0.03 to 0.2)        | -3.74<br>(-4.23 to -3.25) |
| Gambia    | Diet low in calcium         | 4<br>(3 to 5)                | 1.26<br>(0.93 to 1.65)       | 14<br>(10 to 20)             | 1.64<br>(1.13 to 2.26)       | 0.7<br>(0.55 to 0.85)     |
| Gambia    | Diet high in red meat       | 0<br>(0 to 1)                | 0.07<br>(0.01 to 0.19)       | 1<br>(0 to 2)                | 0.09<br>(0.01 to 0.23)       | 0.55<br>(0.4 to 0.7)      |
| Gambia    | Diet high in processed meat | 0<br>(0 to 1)                | 0.11<br>(0.01 to 0.21)       | 1<br>(0 to 3)                | 0.16<br>(0.02 to 0.32)       | 1.14<br>(0.98 to 1.3)     |
| Gambia    | Diet low in whole grains    | 2<br>(1 to 3)                | 0.69<br>(0.25 to 1)          | 9<br>(3 to 13)               | 0.97<br>(0.36 to 1.47)       | 0.98<br>(0.82 to 1.15)    |
| Georgia   | All dietary risks           | 229<br>(162 to 283)          | 3.77<br>(2.66 to 4.66)       | 264<br>(185 to 336)          | 4.43<br>(3.12 to 5.65)       | 1.46<br>(0.99 to 1.92)    |
| Georgia   | Diet low in milk            | 144<br>(71 to 178)           | 2.37<br>(1.17 to 2.93)       | 168<br>(82 to 220)           | 2.82<br>(1.37 to 3.68)       | 1.66<br>(1.12 to 2.21)    |

| Countries | Risk factors                | 1990                         |                              | 2019                         |                              | 1990-2019                 |
|-----------|-----------------------------|------------------------------|------------------------------|------------------------------|------------------------------|---------------------------|
|           |                             | Number of deaths<br>(95% UI) | ASDR per 100,000<br>(95% UI) | Number of deaths<br>(95% UI) | ASDR per 100,000<br>(95% UI) | EAPC of ASDR<br>(95% CI)  |
| Georgia   | Diet low in fiber           | 6<br>(2 to 16)               | 0.11<br>(0.04 to 0.28)       | 11<br>(4 to 26)              | 0.18<br>(0.06 to 0.43)       | 2.01<br>(1.48 to 2.54)    |
| Georgia   | Diet low in calcium         | 64<br>(34 to 106)            | 1.07<br>(0.58 to 1.76)       | 70<br>(37 to 117)            | 1.17<br>(0.61 to 1.95)       | 0.7<br>(0.39 to 1)        |
| Georgia   | Diet high in red meat       | 20<br>(2 to 53)              | 0.32<br>(0.03 to 0.87)       | 20<br>(2 to 56)              | 0.35<br>(0.03 to 0.94)       | 1.48<br>(0.81 to 2.16)    |
| Georgia   | Diet high in processed meat | 24<br>(4 to 40)              | 0.39<br>(0.06 to 0.66)       | 28<br>(5 to 49)              | 0.47<br>(0.08 to 0.83)       | 1.84<br>(1.22 to 2.47)    |
| Georgia   | Diet low in whole grains    | 144<br>(71 to 178)           | 2.37<br>(1.17 to 2.93)       | 168<br>(82 to 220)           | 2.82<br>(1.37 to 3.68)       | 1.66<br>(1.12 to 2.21)    |
| Germany   | All dietary risks           | 10116<br>(7460 to 12662)     | 7.78<br>(5.73 to 9.72)       | 11624<br>(8408 to 14622)     | 5.59<br>(4.06 to 7)          | -1.56<br>(-2.15 to -0.96) |
| Germany   | Diet low in milk            | 4449<br>(1662 to 6079)       | 3.42<br>(1.28 to 4.66)       | 5750<br>(2126 to 7714)       | 2.76<br>(1.02 to 3.7)        | -1.12<br>(-1.75 to -0.49) |
| Germany   | Diet low in fiber           | 614<br>(209 to 1340)         | 0.46<br>(0.16 to 1.02)       | 742<br>(259 to 1592)         | 0.34<br>(0.12 to 0.74)       | -1.75<br>(-2.48 to -1.01) |
| Germany   | Diet low in calcium         | 2079<br>(1007 to 3719)       | 1.57<br>(0.75 to 2.8)        | 1783<br>(841 to 3113)        | 0.81<br>(0.38 to 1.41)       | -3.02<br>(-3.71 to -2.34) |
| Germany   | Diet high in red meat       | 2408<br>(709 to 4183)        | 1.89<br>(0.57 to 3.23)       | 2433<br>(588 to 4583)        | 1.23<br>(0.33 to 2.26)       | -1.74<br>(-2.12 to -1.37) |
| Germany   | Diet high in processed meat | 2041<br>(654 to 3102)        | 1.57<br>(0.51 to 2.4)        | 2491<br>(844 to 3835)        | 1.21<br>(0.42 to 1.87)       | -1.25<br>(-1.89 to -0.61) |
| Germany   | Diet low in whole grains    | 4449<br>(1662 to 6079)       | 3.42<br>(1.28 to 4.66)       | 5750<br>(2126 to 7714)       | 2.76<br>(1.02 to 3.7)        | -1.12<br>(-1.75 to -0.49) |
| Ghana     | All dietary risks           | 140<br>(107 to 177)          | 2.54<br>(1.97 to 3.16)       | 450<br>(317 to 593)          | 3.15<br>(2.25 to 4.1)        | 0.72<br>(0.69 to 0.75)    |
| Ghana     | Diet low in milk            | 58<br>(21 to 80)             | 1.04<br>(0.38 to 1.44)       | 197<br>(71 to 281)           | 1.38<br>(0.5 to 1.95)        | 0.99<br>(0.96 to 1.01)    |
| Ghana     | Diet low in fiber           | 1<br>(1 to 2)                | 0.02<br>(0.01 to 0.04)       | 3<br>(2 to 3)                | 0.02<br>(0.01 to 0.02)       | -0.1<br>(-0.4 to 0.2)     |
| Ghana     | Diet low in calcium         | 89<br>(68 to 114)            | 1.62<br>(1.25 to 2.08)       | 253<br>(179 to 341)          | 1.79<br>(1.28 to 2.41)       | 0.26<br>(0.22 to 0.3)     |
| Ghana     | Diet high in red meat       | 5<br>(1 to 13)               | 0.09<br>(0.01 to 0.23)       | 21<br>(2 to 55)              | 0.14<br>(0.02 to 0.37)       | 1.65<br>(1.54 to 1.75)    |
| Ghana     | Diet high in processed meat | 8<br>(1 to 15)               | 0.14<br>(0.02 to 0.26)       | 37<br>(5 to 68)              | 0.25<br>(0.03 to 0.45)       | 2.1<br>(2.01 to 2.19)     |

| Countries | Risk factors                | 1990                         |                              | 2019                         |                              | 1990-2019                 |
|-----------|-----------------------------|------------------------------|------------------------------|------------------------------|------------------------------|---------------------------|
|           |                             | Number of deaths<br>(95% UI) | ASDR per 100,000<br>(95% UI) | Number of deaths<br>(95% UI) | ASDR per 100,000<br>(95% UI) | EAPC of ASDR<br>(95% CI)  |
| Ghana     | Diet low in whole grains    | 58<br>(21 to 80)             | 1.04<br>(0.38 to 1.44)       | 197<br>(71 to 281)           | 1.38<br>(0.5 to 1.95)        | 0.99<br>(0.96 to 1.01)    |
| Greece    | All dietary risks           | 711<br>(517 to 864)          | 4.74<br>(3.44 to 5.74)       | 1362<br>(983 to 1653)        | 5.1<br>(3.66 to 6.18)        | -0.21<br>(-0.43 to 0)     |
| Greece    | Diet low in milk            | 457<br>(225 to 565)          | 3.04<br>(1.49 to 3.74)       | 837<br>(407 to 1046)         | 3.11<br>(1.51 to 3.91)       | -0.45<br>(-0.68 to -0.22) |
| Greece    | Diet low in fiber           | 17<br>(7 to 44)              | 0.12<br>(0.05 to 0.29)       | 53<br>(18 to 125)            | 0.19<br>(0.06 to 0.44)       | 1.25<br>(1.07 to 1.43)    |
| Greece    | Diet low in calcium         | 111<br>(52 to 198)           | 0.73<br>(0.34 to 1.3)        | 216<br>(107 to 381)          | 0.75<br>(0.36 to 1.31)       | -0.33<br>(-0.57 to -0.08) |
| Greece    | Diet high in red meat       | 132<br>(30 to 254)           | 0.89<br>(0.21 to 1.7)        | 278<br>(74 to 505)           | 1.11<br>(0.31 to 1.96)       | 0.43<br>(0.07 to 0.79)    |
| Greece    | Diet high in processed meat | 82<br>(13 to 135)            | 0.55<br>(0.09 to 0.9)        | 159<br>(28 to 264)           | 0.63<br>(0.12 to 1.02)       | 0.15<br>(-0.01 to 0.3)    |
| Greece    | Diet low in whole grains    | 457<br>(225 to 565)          | 3.04<br>(1.49 to 3.74)       | 837<br>(407 to 1046)         | 3.11<br>(1.51 to 3.91)       | -0.45<br>(-0.68 to -0.22) |
| Greenland | All dietary risks           | 3<br>(2 to 4)                | 9.6<br>(6.93 to 12)          | 6<br>(4 to 8)                | 9.78<br>(6.83 to 12.82)      | -0.38<br>(-0.7 to -0.07)  |
| Greenland | Diet low in milk            | 1<br>(1 to 2)                | 4.62<br>(1.73 to 6.19)       | 3<br>(1 to 4)                | 4.83<br>(1.81 to 6.6)        | -0.29<br>(-0.6 to 0.02)   |
| Greenland | Diet low in fiber           | 0<br>(0 to 0)                | 0.65<br>(0.23 to 1.28)       | 0<br>(0 to 1)                | 0.46<br>(0.16 to 1.02)       | -1.84<br>(-2.25 to -1.43) |
| Greenland | Diet low in calcium         | 1<br>(0 to 1)                | 1.76<br>(0.87 to 3.06)       | 1<br>(0 to 1)                | 1.38<br>(0.65 to 2.37)       | -1.44<br>(-1.86 to -1.03) |
| Greenland | Diet high in red meat       | 1<br>(0 to 1)                | 2.1<br>(0.61 to 3.89)        | 2<br>(0 to 3)                | 2.36<br>(0.69 to 4.36)       | 0.08<br>(-0.16 to 0.33)   |
| Greenland | Diet high in processed meat | 1<br>(0 to 1)                | 1.85<br>(0.59 to 2.83)       | 1<br>(0 to 2)                | 2.08<br>(0.7 to 3.32)        | 0<br>(-0.31 to 0.31)      |
| Greenland | Diet low in whole grains    | 1<br>(1 to 2)                | 4.62<br>(1.73 to 6.19)       | 3<br>(1 to 4)                | 4.83<br>(1.81 to 6.6)        | -0.29<br>(-0.6 to 0.02)   |
| Grenada   | All dietary risks           | 4<br>(3 to 5)                | 4.99<br>(3.65 to 6)          | 6<br>(4 to 8)                | 6.3<br>(4.39 to 7.72)        | 0.89<br>(0.77 to 1.01)    |
| Grenada   | Diet low in milk            | 2<br>(1 to 3)                | 2.79<br>(1.28 to 3.51)       | 4<br>(2 to 5)                | 3.61<br>(1.53 to 4.66)       | 0.96<br>(0.84 to 1.09)    |
| Grenada   | Diet low in fiber           | 0<br>(0 to 1)                | 0.3<br>(0.1 to 0.67)         | 0<br>(0 to 1)                | 0.32<br>(0.1 to 0.76)        | 0.18<br>(0.06 to 0.29)    |

| Countries | Risk factors                | 1990                         |                              | 2019                         |                              | 1990-2019                 |
|-----------|-----------------------------|------------------------------|------------------------------|------------------------------|------------------------------|---------------------------|
|           |                             | Number of deaths<br>(95% UI) | ASDR per 100,000<br>(95% UI) | Number of deaths<br>(95% UI) | ASDR per 100,000<br>(95% UI) | EAPC of ASDR<br>(95% CI)  |
| Grenada   | Diet low in calcium         | 2<br>(1 to 2)                | 2.19<br>(1.51 to 2.99)       | 3<br>(2 to 4)                | 2.54<br>(1.63 to 3.62)       | 0.63<br>(0.5 to 0.76)     |
| Grenada   | Diet high in red meat       | 0<br>(0 to 0)                | 0.22<br>(0.03 to 0.54)       | 0<br>(0 to 1)                | 0.37<br>(0.04 to 0.97)       | 1.97<br>(1.84 to 2.1)     |
| Grenada   | Diet high in processed meat | 0<br>(0 to 0)                | 0.15<br>(0.03 to 0.27)       | 0<br>(0 to 0)                | 0.21<br>(0.04 to 0.37)       | 1.32<br>(1.17 to 1.47)    |
| Grenada   | Diet low in whole grains    | 2<br>(1 to 3)                | 2.79<br>(1.28 to 3.51)       | 4<br>(2 to 5)                | 3.61<br>(1.53 to 4.66)       | 0.96<br>(0.84 to 1.09)    |
| Guam      | All dietary risks           | 3<br>(2 to 4)                | 5.54<br>(3.77 to 7.22)       | 8<br>(6 to 11)               | 4.39<br>(3 to 5.72)          | -0.82<br>(-1.2 to -0.44)  |
| Guam      | Diet low in milk            | 2<br>(1 to 2)                | 2.74<br>(1.04 to 3.73)       | 4<br>(2 to 6)                | 2.27<br>(0.83 to 3.13)       | -0.64<br>(-1.02 to -0.25) |
| Guam      | Diet low in fiber           | 0<br>(0 to 0)                | 0.04<br>(0.03 to 0.04)       | 0<br>(0 to 0)                | 0.03<br>(0.03 to 0.04)       | -0.67<br>(-1.05 to -0.29) |
| Guam      | Diet low in calcium         | 2<br>(1 to 2)                | 2.62<br>(1.7 to 3.71)        | 4<br>(2 to 5)                | 1.9<br>(1.21 to 2.75)        | -1.2<br>(-1.57 to -0.83)  |
| Guam      | Diet high in red meat       | 0<br>(0 to 1)                | 0.65<br>(0.08 to 1.58)       | 1<br>(0 to 2)                | 0.56<br>(0.08 to 1.3)        | -0.44<br>(-0.84 to -0.03) |
| Guam      | Diet high in processed meat | 0<br>(0 to 0)                | 0.17<br>(0.04 to 0.31)       | 0<br>(0 to 1)                | 0.15<br>(0.03 to 0.28)       | -0.24<br>(-0.61 to 0.14)  |
| Guam      | Diet low in whole grains    | 2<br>(1 to 2)                | 2.74<br>(1.04 to 3.73)       | 4<br>(2 to 6)                | 2.27<br>(0.83 to 3.13)       | -0.64<br>(-1.02 to -0.25) |
| Guatemala | All dietary risks           | 60<br>(48 to 72)             | 1.87<br>(1.49 to 2.2)        | 336<br>(242 to 435)          | 3.19<br>(2.33 to 4.09)       | 1.66<br>(1.32 to 2.01)    |
| Guatemala | Diet low in milk            | 23<br>(8 to 32)              | 0.7<br>(0.26 to 0.98)        | 141<br>(52 to 203)           | 1.33<br>(0.49 to 1.92)       | 2.11<br>(1.74 to 2.48)    |
| Guatemala | Diet low in fiber           | 1<br>(0 to 1)                | 0.02<br>(0.01 to 0.05)       | 5<br>(2 to 13)               | 0.05<br>(0.02 to 0.12)       | 2.26<br>(1.58 to 2.94)    |
| Guatemala | Diet low in calcium         | 40<br>(32 to 49)             | 1.24<br>(0.99 to 1.52)       | 202<br>(145 to 269)          | 1.93<br>(1.39 to 2.55)       | 1.28<br>(0.95 to 1.61)    |
| Guatemala | Diet high in red meat       | 2<br>(0 to 6)                | 0.07<br>(0.01 to 0.18)       | 16<br>(2 to 43)              | 0.15<br>(0.02 to 0.4)        | 2.47<br>(2.03 to 2.91)    |
| Guatemala | Diet high in processed meat | 2<br>(0 to 4)                | 0.06<br>(0.01 to 0.11)       | 12<br>(2 to 24)              | 0.11<br>(0.02 to 0.22)       | 2.3<br>(1.99 to 2.62)     |
| Guatemala | Diet low in whole grains    | 23<br>(8 to 32)              | 0.7<br>(0.26 to 0.98)        | 141<br>(52 to 203)           | 1.33<br>(0.49 to 1.92)       | 2.11<br>(1.74 to 2.48)    |



| Countries     | Risk factors                | 1990                         |                              | 2019                         |                              | 1990-2019                 |
|---------------|-----------------------------|------------------------------|------------------------------|------------------------------|------------------------------|---------------------------|
|               |                             | Number of deaths<br>(95% UI) | ASDR per 100,000<br>(95% UI) | Number of deaths<br>(95% UI) | ASDR per 100,000<br>(95% UI) | EAPC of ASDR<br>(95% CI)  |
| Guinea        | All dietary risks           | 70<br>(56 to 86)             | 2.3<br>(1.83 to 2.8)         | 143<br>(101 to 191)          | 2.83<br>(2.01 to 3.76)       | 0.79<br>(0.75 to 0.82)    |
| Guinea        | Diet low in milk            | 26<br>(10 to 36)             | 0.84<br>(0.32 to 1.18)       | 52<br>(18 to 78)             | 1.03<br>(0.37 to 1.51)       | 0.77<br>(0.74 to 0.81)    |
| Guinea        | Diet low in fiber           | 2<br>(1 to 5)                | 0.07<br>(0.02 to 0.16)       | 4<br>(1 to 9)                | 0.07<br>(0.02 to 0.18)       | 0.34<br>(0.15 to 0.54)    |
| Guinea        | Diet low in calcium         | 46<br>(36 to 59)             | 1.51<br>(1.17 to 1.94)       | 92<br>(65 to 125)            | 1.83<br>(1.29 to 2.47)       | 0.7<br>(0.66 to 0.74)     |
| Guinea        | Diet high in red meat       | 2<br>(0 to 5)                | 0.07<br>(0.01 to 0.17)       | 6<br>(1 to 16)               | 0.12<br>(0.01 to 0.31)       | 2.12<br>(2.01 to 2.24)    |
| Guinea        | Diet high in processed meat | 4<br>(0 to 8)                | 0.13<br>(0.02 to 0.24)       | 9<br>(1 to 18)               | 0.17<br>(0.02 to 0.34)       | 1.1<br>(1.06 to 1.15)     |
| Guinea        | Diet low in whole grains    | 26<br>(10 to 36)             | 0.84<br>(0.32 to 1.18)       | 52<br>(18 to 78)             | 1.03<br>(0.37 to 1.51)       | 0.77<br>(0.74 to 0.81)    |
| Guinea-Bissau | All dietary risks           | 14<br>(10 to 19)             | 3.73<br>(2.63 to 4.88)       | 24<br>(17 to 32)             | 3.76<br>(2.73 to 4.87)       | 0.04<br>(0 to 0.08)       |
| Guinea-Bissau | Diet low in milk            | 4<br>(2 to 6)                | 1.14<br>(0.44 to 1.74)       | 8<br>(3 to 12)               | 1.24<br>(0.46 to 1.86)       | 0.38<br>(0.33 to 0.42)    |
| Guinea-Bissau | Diet low in fiber           | 2<br>(1 to 3)                | 0.47<br>(0.2 to 0.78)        | 1<br>(0 to 3)                | 0.21<br>(0.07 to 0.43)       | -3.38<br>(-3.61 to -3.14) |
| Guinea-Bissau | Diet low in calcium         | 9<br>(6 to 12)               | 2.4<br>(1.62 to 3.23)        | 16<br>(11 to 22)             | 2.48<br>(1.76 to 3.31)       | 0.15<br>(0.11 to 0.18)    |
| Guinea-Bissau | Diet high in red meat       | 1<br>(0 to 2)                | 0.19<br>(0.02 to 0.56)       | 1<br>(0 to 4)                | 0.21<br>(0.02 to 0.59)       | 0.29<br>(0.22 to 0.37)    |
| Guinea-Bissau | Diet high in processed meat | 1<br>(0 to 1)                | 0.18<br>(0.02 to 0.36)       | 1<br>(0 to 3)                | 0.2<br>(0.02 to 0.39)        | 0.3<br>(0.25 to 0.34)     |
| Guinea-Bissau | Diet low in whole grains    | 4<br>(2 to 6)                | 1.14<br>(0.44 to 1.74)       | 8<br>(3 to 12)               | 1.24<br>(0.46 to 1.86)       | 0.38<br>(0.33 to 0.42)    |
| Guyana        | All dietary risks           | 17<br>(13 to 21)             | 4.84<br>(3.83 to 5.82)       | 26<br>(18 to 35)             | 4.58<br>(3.16 to 6.03)       | -0.28<br>(-0.42 to -0.14) |
| Guyana        | Diet low in milk            | 7<br>(2 to 9)                | 1.87<br>(0.69 to 2.54)       | 13<br>(5 to 18)              | 2.2<br>(0.81 to 3.1)         | 0.48<br>(0.31 to 0.65)    |
| Guyana        | Diet low in fiber           | 2<br>(1 to 4)                | 0.58<br>(0.23 to 0.99)       | 2<br>(1 to 4)                | 0.35<br>(0.12 to 0.71)       | -1.66<br>(-1.98 to -1.34) |
| Guyana        | Diet low in calcium         | 10<br>(8 to 13)              | 2.82<br>(2.2 to 3.54)        | 12<br>(8 to 18)              | 2.21<br>(1.45 to 3.16)       | -0.97<br>(-1.14 to -0.8)  |

| Countries | Risk factors                | 1990                         |                              | 2019                         |                              | 1990-2019                |
|-----------|-----------------------------|------------------------------|------------------------------|------------------------------|------------------------------|--------------------------|
|           |                             | Number of deaths<br>(95% UI) | ASDR per 100,000<br>(95% UI) | Number of deaths<br>(95% UI) | ASDR per 100,000<br>(95% UI) | EAPC of ASDR<br>(95% CI) |
| Guyana    | Diet high in red meat       | 1<br>(0 to 1)                | 0.16<br>(0.03 to 0.38)       | 1<br>(0 to 3)                | 0.19<br>(0.03 to 0.46)       | 0.29<br>(0.1 to 0.49)    |
| Guyana    | Diet high in processed meat | 1<br>(0 to 1)                | 0.14<br>(0.03 to 0.26)       | 1<br>(0 to 2)                | 0.18<br>(0.03 to 0.35)       | 0.8<br>(0.62 to 0.99)    |
| Guyana    | Diet low in whole grains    | 7<br>(2 to 9)                | 1.87<br>(0.69 to 2.54)       | 13<br>(5 to 18)              | 2.2<br>(0.81 to 3.1)         | 0.48<br>(0.31 to 0.65)   |
| Haiti     | All dietary risks           | 122<br>(80 to 157)           | 4.11<br>(2.73 to 5.23)       | 270<br>(179 to 376)          | 4.27<br>(2.88 to 5.84)       | 0.26<br>(0.2 to 0.33)    |
| Haiti     | Diet low in milk            | 50<br>(20 to 70)             | 1.67<br>(0.67 to 2.34)       | 107<br>(38 to 163)           | 1.69<br>(0.6 to 2.54)        | 0.2<br>(0.1 to 0.29)     |
| Haiti     | Diet low in fiber           | 4<br>(1 to 10)               | 0.15<br>(0.05 to 0.36)       | 14<br>(4 to 28)              | 0.22<br>(0.07 to 0.45)       | 0.97<br>(0.67 to 1.26)   |
| Haiti     | Diet low in calcium         | 78<br>(50 to 104)            | 2.63<br>(1.71 to 3.48)       | 170<br>(114 to 239)          | 2.7<br>(1.81 to 3.78)        | 0.21<br>(0.15 to 0.28)   |
| Haiti     | Diet high in red meat       | 5<br>(1 to 14)               | 0.16<br>(0.02 to 0.44)       | 12<br>(1 to 33)              | 0.19<br>(0.02 to 0.51)       | 0.61<br>(0.5 to 0.73)    |
| Haiti     | Diet high in processed meat | 3<br>(1 to 6)                | 0.09<br>(0.02 to 0.18)       | 7<br>(1 to 14)               | 0.1<br>(0.02 to 0.21)        | 0.6<br>(0.49 to 0.71)    |
| Haiti     | Diet low in whole grains    | 50<br>(20 to 70)             | 1.67<br>(0.67 to 2.34)       | 107<br>(38 to 163)           | 1.69<br>(0.6 to 2.54)        | 0.2<br>(0.1 to 0.29)     |
| Honduras  | All dietary risks           | 33<br>(25 to 41)             | 1.66<br>(1.23 to 2.06)       | 135<br>(85 to 202)           | 2.43<br>(1.55 to 3.64)       | 1.37<br>(1.24 to 1.51)   |
| Honduras  | Diet low in milk            | 13<br>(5 to 19)              | 0.66<br>(0.25 to 0.94)       | 61<br>(22 to 99)             | 1.1<br>(0.39 to 1.74)        | 1.83<br>(1.69 to 1.97)   |
| Honduras  | Diet low in fiber           | 1<br>(0 to 2)                | 0.04<br>(0.01 to 0.09)       | 4<br>(1 to 10)               | 0.07<br>(0.02 to 0.18)       | 2.25<br>(1.93 to 2.58)   |
| Honduras  | Diet low in calcium         | 20<br>(15 to 26)             | 1.03<br>(0.76 to 1.32)       | 71<br>(43 to 111)            | 1.3<br>(0.81 to 1.99)        | 0.82<br>(0.66 to 0.99)   |
| Honduras  | Diet high in red meat       | 2<br>(0 to 5)                | 0.09<br>(0.01 to 0.23)       | 9<br>(1 to 25)               | 0.15<br>(0.02 to 0.43)       | 1.95<br>(1.81 to 2.09)   |
| Honduras  | Diet high in processed meat | 1<br>(0 to 2)                | 0.06<br>(0.01 to 0.1)        | 6<br>(1 to 12)               | 0.1<br>(0.02 to 0.21)        | 2.11<br>(1.97 to 2.24)   |
| Honduras  | Diet low in whole grains    | 13<br>(5 to 19)              | 0.66<br>(0.25 to 0.94)       | 61<br>(22 to 99)             | 1.1<br>(0.39 to 1.74)        | 1.83<br>(1.69 to 1.97)   |

| Countries | Risk factors                | 1990                         |                              | 2019                         |                              | 1990-2019                 |
|-----------|-----------------------------|------------------------------|------------------------------|------------------------------|------------------------------|---------------------------|
|           |                             | Number of deaths<br>(95% UI) | ASDR per 100,000<br>(95% UI) | Number of deaths<br>(95% UI) | ASDR per 100,000<br>(95% UI) | EAPC of ASDR<br>(95% CI)  |
| Hungary   | All dietary risks           | 1386<br>(972 to 1730)        | 9.65<br>(6.76 to 12.02)      | 1846<br>(1251 to 2435)       | 9.35<br>(6.29 to 12.34)      | -0.29<br>(-0.5 to -0.08)  |
| Hungary   | Diet low in milk            | 720<br>(269 to 935)          | 5<br>(1.86 to 6.52)          | 942<br>(346 to 1297)         | 4.76<br>(1.76 to 6.57)       | -0.35<br>(-0.53 to -0.17) |
| Hungary   | Diet low in fiber           | 84<br>(28 to 187)            | 0.59<br>(0.2 to 1.31)        | 124<br>(41 to 269)           | 0.62<br>(0.2 to 1.36)        | -0.24<br>(-0.64 to 0.17)  |
| Hungary   | Diet low in calcium         | 409<br>(227 to 673)          | 2.85<br>(1.58 to 4.67)       | 548<br>(295 to 885)          | 2.74<br>(1.47 to 4.46)       | -0.5<br>(-0.85 to -0.15)  |
| Hungary   | Diet high in red meat       | 190<br>(30 to 435)           | 1.32<br>(0.21 to 3.02)       | 231<br>(30 to 543)           | 1.2<br>(0.17 to 2.78)        | -0.25<br>(-0.35 to -0.15) |
| Hungary   | Diet high in processed meat | 166<br>(26 to 268)           | 1.16<br>(0.19 to 1.88)       | 261<br>(56 to 435)           | 1.35<br>(0.3 to 2.24)        | 0.7<br>(0.54 to 0.87)     |
| Hungary   | Diet low in whole grains    | 720<br>(269 to 935)          | 5<br>(1.86 to 6.52)          | 942<br>(346 to 1297)         | 4.76<br>(1.76 to 6.57)       | -0.35<br>(-0.53 to -0.17) |
| Iceland   | All dietary risks           | 15<br>(11 to 18)             | 5.2<br>(3.89 to 6.28)        | 23<br>(16 to 29)             | 3.88<br>(2.72 to 4.87)       | -1.22<br>(-1.39 to -1.04) |
| Iceland   | Diet low in milk            | 8<br>(3 to 10)               | 2.64<br>(1.02 to 3.38)       | 12<br>(4 to 16)              | 1.97<br>(0.73 to 2.61)       | -1.22<br>(-1.38 to -1.06) |
| Iceland   | Diet low in fiber           | 2<br>(1 to 3)                | 0.61<br>(0.24 to 1.04)       | 3<br>(1 to 5)                | 0.43<br>(0.16 to 0.77)       | -1.47<br>(-1.76 to -1.19) |
| Iceland   | Diet low in calcium         | 1<br>(1 to 2)                | 0.47<br>(0.21 to 0.81)       | 2<br>(1 to 4)                | 0.35<br>(0.17 to 0.58)       | -1.56<br>(-1.99 to -1.14) |
| Iceland   | Diet high in red meat       | 4<br>(2 to 7)                | 1.46<br>(0.53 to 2.29)       | 6<br>(2 to 10)               | 1.02<br>(0.33 to 1.69)       | -1.35<br>(-1.45 to -1.24) |
| Iceland   | Diet high in processed meat | 2<br>(1 to 4)                | 0.85<br>(0.26 to 1.31)       | 4<br>(1 to 6)                | 0.67<br>(0.19 to 1.05)       | -0.95<br>(-1.08 to -0.82) |
| Iceland   | Diet low in whole grains    | 8<br>(3 to 10)               | 2.64<br>(1.02 to 3.38)       | 12<br>(4 to 16)              | 1.97<br>(0.73 to 2.61)       | -1.22<br>(-1.38 to -1.06) |
| India     | All dietary risks           | 7349<br>(5771 to 8966)       | 1.91<br>(1.51 to 2.31)       | 24864<br>(18529 to 31324)    | 2.41<br>(1.81 to 3.02)       | 0.67<br>(0.55 to 0.8)     |
| India     | Diet low in milk            | 3116<br>(1186 to 4259)       | 0.79<br>(0.3 to 1.08)        | 11220<br>(4244 to 15602)     | 1.07<br>(0.4 to 1.48)        | 0.9<br>(0.76 to 1.04)     |
| India     | Diet low in fiber           | 573<br>(212 to 1129)         | 0.15<br>(0.06 to 0.29)       | 1356<br>(499 to 2983)        | 0.13<br>(0.05 to 0.29)       | -0.62<br>(-0.9 to -0.33)  |

| Countries                  | Risk factors                | 1990                         |                              | 2019                         |                              | 1990-2019                 |
|----------------------------|-----------------------------|------------------------------|------------------------------|------------------------------|------------------------------|---------------------------|
|                            |                             | Number of deaths<br>(95% UI) | ASDR per 100,000<br>(95% UI) | Number of deaths<br>(95% UI) | ASDR per 100,000<br>(95% UI) | EAPC of ASDR<br>(95% CI)  |
| India                      | Diet low in calcium         | 4194<br>(3254 to 5326)       | 1.12<br>(0.88 to 1.41)       | 13505<br>(9962 to 17712)     | 1.33<br>(0.99 to 1.74)       | 0.51<br>(0.38 to 0.64)    |
| India                      | Diet high in red meat       | 182<br>(58 to 375)           | 0.05<br>(0.01 to 0.1)        | 673<br>(191 to 1464)         | 0.06<br>(0.02 to 0.14)       | 0.96<br>(0.78 to 1.14)    |
| India                      | Diet high in processed meat | 196<br>(135 to 304)          | 0.05<br>(0.03 to 0.07)       | 957<br>(635 to 1398)         | 0.09<br>(0.06 to 0.13)       | 2.16<br>(2.04 to 2.28)    |
| India                      | Diet low in whole grains    | 3116<br>(1186 to 4259)       | 0.79<br>(0.3 to 1.08)        | 11220<br>(4244 to 15602)     | 1.07<br>(0.4 to 1.48)        | 0.9<br>(0.76 to 1.04)     |
| Indonesia                  | All dietary risks           | 3347<br>(2432 to 4228)       | 3.66<br>(2.7 to 4.57)        | 11599<br>(7639 to 15679)     | 6<br>(3.9 to 8.09)           | 1.72<br>(1.61 to 1.83)    |
| Indonesia                  | Diet low in milk            | 1003<br>(389 to 1535)        | 1.09<br>(0.42 to 1.64)       | 3710<br>(1425 to 6007)       | 1.9<br>(0.73 to 3.08)        | 1.95<br>(1.82 to 2.08)    |
| Indonesia                  | Diet low in fiber           | 429<br>(185 to 703)          | 0.47<br>(0.2 to 0.77)        | 1054<br>(417 to 1995)        | 0.56<br>(0.22 to 1.05)       | 0.59<br>(0.44 to 0.74)    |
| Indonesia                  | Diet low in calcium         | 2274<br>(1621 to 2962)       | 2.49<br>(1.78 to 3.22)       | 7835<br>(5026 to 10740)      | 4.07<br>(2.57 to 5.58)       | 1.69<br>(1.58 to 1.8)     |
| Indonesia                  | Diet high in red meat       | 98<br>(17 to 244)            | 0.1<br>(0.02 to 0.25)        | 396<br>(59 to 1039)          | 0.2<br>(0.03 to 0.52)        | 2.15<br>(2.06 to 2.24)    |
| Indonesia                  | Diet high in processed meat | 34<br>(24 to 44)             | 0.04<br>(0.03 to 0.05)       | 156<br>(87 to 238)           | 0.08<br>(0.05 to 0.12)       | 2.78<br>(2.72 to 2.83)    |
| Indonesia                  | Diet low in whole grains    | 1003<br>(389 to 1535)        | 1.09<br>(0.42 to 1.64)       | 3710<br>(1425 to 6007)       | 1.9<br>(0.73 to 3.08)        | 1.95<br>(1.82 to 2.08)    |
| Iran (Islamic Republic of) | All dietary risks           | 658<br>(503 to 826)          | 2.89<br>(2.19 to 3.63)       | 2408<br>(1816 to 2840)       | 3.51<br>(2.65 to 4.14)       | 0.9<br>(0.72 to 1.08)     |
| Iran (Islamic Republic of) | Diet low in milk            | 347<br>(171 to 462)          | 1.51<br>(0.75 to 2.01)       | 1366<br>(672 to 1711)        | 1.98<br>(0.98 to 2.49)       | 1.14<br>(0.99 to 1.29)    |
| Iran (Islamic Republic of) | Diet low in fiber           | 21<br>(8 to 49)              | 0.1<br>(0.04 to 0.22)        | 47<br>(21 to 102)            | 0.07<br>(0.03 to 0.15)       | -0.78<br>(-1.17 to -0.39) |
| Iran (Islamic Republic of) | Diet low in calcium         | 336<br>(247 to 445)          | 1.49<br>(1.09 to 1.98)       | 1125<br>(825 to 1472)        | 1.65<br>(1.21 to 2.16)       | 0.61<br>(0.41 to 0.82)    |

| Countries                  | Risk factors                | 1990                         |                              | 2019                         |                              | 1990-2019                 |
|----------------------------|-----------------------------|------------------------------|------------------------------|------------------------------|------------------------------|---------------------------|
|                            |                             | Number of deaths<br>(95% UI) | ASDR per 100,000<br>(95% UI) | Number of deaths<br>(95% UI) | ASDR per 100,000<br>(95% UI) | EAPC of ASDR<br>(95% CI)  |
| Iran (Islamic Republic of) | Diet high in red meat       | 40<br>(4 to 110)             | 0.17<br>(0.02 to 0.46)       | 136<br>(14 to 356)           | 0.2<br>(0.02 to 0.5)         | 0.63<br>(0.43 to 0.84)    |
| Iran (Islamic Republic of) | Diet high in processed meat | 16<br>(5 to 30)              | 0.07<br>(0.02 to 0.12)       | 65<br>(18 to 112)            | 0.09<br>(0.03 to 0.16)       | 1.26<br>(1.13 to 1.4)     |
| Iran (Islamic Republic of) | Diet low in whole grains    | 347<br>(171 to 462)          | 1.51<br>(0.75 to 2.01)       | 1366<br>(672 to 1711)        | 1.98<br>(0.98 to 2.49)       | 1.14<br>(0.99 to 1.29)    |
| Iraq                       | All dietary risks           | 209<br>(144 to 292)          | 2.81<br>(1.95 to 3.88)       | 710<br>(518 to 915)          | 3.32<br>(2.45 to 4.18)       | 0.7<br>(0.56 to 0.83)     |
| Iraq                       | Diet low in milk            | 104<br>(45 to 151)           | 1.4<br>(0.6 to 2.04)         | 333<br>(135 to 474)          | 1.55<br>(0.64 to 2.17)       | 0.56<br>(0.35 to 0.77)    |
| Iraq                       | Diet low in fiber           | 4<br>(1 to 9)                | 0.05<br>(0.02 to 0.13)       | 29<br>(9 to 67)              | 0.14<br>(0.04 to 0.31)       | 3.13<br>(2.48 to 3.79)    |
| Iraq                       | Diet low in calcium         | 117<br>(79 to 167)           | 1.58<br>(1.08 to 2.25)       | 412<br>(296 to 549)          | 1.94<br>(1.41 to 2.52)       | 0.71<br>(0.63 to 0.78)    |
| Iraq                       | Diet high in red meat       | 9<br>(1 to 25)               | 0.12<br>(0.01 to 0.33)       | 24<br>(4 to 57)              | 0.11<br>(0.02 to 0.26)       | 0.17<br>(-0.4 to 0.74)    |
| Iraq                       | Diet high in processed meat | 5<br>(1 to 10)               | 0.06<br>(0.02 to 0.13)       | 16<br>(4 to 29)              | 0.07<br>(0.02 to 0.13)       | 0.79<br>(0.45 to 1.13)    |
| Iraq                       | Diet low in whole grains    | 104<br>(45 to 151)           | 1.4<br>(0.6 to 2.04)         | 333<br>(135 to 474)          | 1.55<br>(0.64 to 2.17)       | 0.56<br>(0.35 to 0.77)    |
| Ireland                    | All dietary risks           | 312<br>(225 to 390)          | 7.73<br>(5.62 to 9.68)       | 416<br>(295 to 528)          | 5.45<br>(3.88 to 6.91)       | -1.26<br>(-1.3 to -1.21)  |
| Ireland                    | Diet low in milk            | 151<br>(56 to 203)           | 3.74<br>(1.4 to 5.05)        | 191<br>(72 to 267)           | 2.5<br>(0.94 to 3.49)        | -1.45<br>(-1.57 to -1.33) |
| Ireland                    | Diet low in fiber           | 14<br>(5 to 33)              | 0.34<br>(0.12 to 0.83)       | 17<br>(6 to 41)              | 0.22<br>(0.08 to 0.53)       | -1.06<br>(-1.23 to -0.9)  |
| Ireland                    | Diet low in calcium         | 45<br>(21 to 80)             | 1.11<br>(0.52 to 1.96)       | 41<br>(18 to 70)             | 0.53<br>(0.23 to 0.9)        | -2.24<br>(-2.42 to -2.06) |
| Ireland                    | Diet high in red meat       | 92<br>(31 to 152)            | 2.3<br>(0.77 to 3.77)        | 146<br>(60 to 229)           | 1.93<br>(0.8 to 3)           | -0.73<br>(-0.83 to -0.62) |
| Ireland                    | Diet high in processed meat | 50<br>(11 to 79)             | 1.25<br>(0.28 to 1.96)       | 74<br>(19 to 115)            | 0.97<br>(0.25 to 1.5)        | -0.93<br>(-1.07 to -0.79) |

| Countries | Risk factors                | 1990                         |                              | 2019                         |                              | 1990-2019                 |
|-----------|-----------------------------|------------------------------|------------------------------|------------------------------|------------------------------|---------------------------|
|           |                             | Number of deaths<br>(95% UI) | ASDR per 100,000<br>(95% UI) | Number of deaths<br>(95% UI) | ASDR per 100,000<br>(95% UI) | EAPC of ASDR<br>(95% CI)  |
| Ireland   | Diet low in whole grains    | 151<br>(56 to 203)           | 3.74<br>(1.4 to 5.05)        | 191<br>(72 to 267)           | 2.5<br>(0.94 to 3.49)        | -1.45<br>(-1.57 to -1.33) |
| Israel    | All dietary risks           | 309<br>(205 to 386)          | 6.57<br>(4.38 to 8.23)       | 587<br>(388 to 734)          | 4.84<br>(3.2 to 6.05)        | -1.82<br>(-2.1 to -1.53)  |
| Israel    | Diet low in milk            | 205<br>(91 to 258)           | 4.33<br>(1.93 to 5.48)       | 388<br>(167 to 496)          | 3.2<br>(1.38 to 4.08)        | -1.84<br>(-2.15 to -1.53) |
| Israel    | Diet low in fiber           | 7<br>(3 to 16)               | 0.15<br>(0.06 to 0.36)       | 13<br>(6 to 32)              | 0.1<br>(0.05 to 0.26)        | -1.7<br>(-1.84 to -1.55)  |
| Israel    | Diet low in calcium         | 68<br>(33 to 120)            | 1.43<br>(0.7 to 2.52)        | 99<br>(45 to 174)            | 0.8<br>(0.37 to 1.42)        | -2.61<br>(-2.8 to -2.43)  |
| Israel    | Diet high in red meat       | 30<br>(2 to 80)              | 0.64<br>(0.05 to 1.72)       | 73<br>(9 to 181)             | 0.61<br>(0.08 to 1.5)        | -0.97<br>(-1.34 to -0.6)  |
| Israel    | Diet high in processed meat | 32<br>(4 to 55)              | 0.7<br>(0.09 to 1.19)        | 73<br>(10 to 120)            | 0.61<br>(0.09 to 1)          | -1.18<br>(-1.45 to -0.91) |
| Israel    | Diet low in whole grains    | 205<br>(91 to 258)           | 4.33<br>(1.93 to 5.48)       | 388<br>(167 to 496)          | 3.2<br>(1.38 to 4.08)        | -1.84<br>(-2.15 to -1.53) |
| Italy     | All dietary risks           | 6314<br>(4725 to 7510)       | 7.08<br>(5.3 to 8.45)        | 8868<br>(6524 to 10794)      | 5.65<br>(4.13 to 6.84)       | -0.95<br>(-1.04 to -0.86) |
| Italy     | Diet low in milk            | 3730<br>(1827 to 4619)       | 4.18<br>(2.04 to 5.18)       | 5328<br>(2609 to 6695)       | 3.38<br>(1.65 to 4.23)       | -0.9<br>(-1.02 to -0.79)  |
| Italy     | Diet low in fiber           | 290<br>(105 to 625)          | 0.33<br>(0.12 to 0.7)        | 450<br>(170 to 945)          | 0.28<br>(0.11 to 0.58)       | -0.58<br>(-0.78 to -0.39) |
| Italy     | Diet low in calcium         | 1140<br>(581 to 1973)        | 1.26<br>(0.64 to 2.19)       | 1504<br>(749 to 2610)        | 0.92<br>(0.46 to 1.59)       | -1.18<br>(-1.28 to -1.08) |
| Italy     | Diet high in red meat       | 1199<br>(340 to 2142)        | 1.36<br>(0.39 to 2.41)       | 1522<br>(404 to 2885)        | 1.01<br>(0.28 to 1.87)       | -1.33<br>(-1.48 to -1.18) |
| Italy     | Diet high in processed meat | 911<br>(268 to 1389)         | 1.03<br>(0.3 to 1.57)        | 1355<br>(425 to 2090)        | 0.89<br>(0.29 to 1.35)       | -0.63<br>(-0.77 to -0.5)  |
| Italy     | Diet low in whole grains    | 3730<br>(1827 to 4619)       | 4.18<br>(2.04 to 5.18)       | 5328<br>(2609 to 6695)       | 3.38<br>(1.65 to 4.23)       | -0.9<br>(-1.02 to -0.79)  |
| Jamaica   | All dietary risks           | 63<br>(45 to 76)             | 3.45<br>(2.47 to 4.2)        | 156<br>(105 to 205)          | 5.14<br>(3.46 to 6.77)       | 1.59<br>(1.31 to 1.87)    |
| Jamaica   | Diet low in milk            | 32<br>(12 to 42)             | 1.79<br>(0.69 to 2.31)       | 85<br>(32 to 119)            | 2.8<br>(1.07 to 3.93)        | 1.68<br>(1.38 to 1.98)    |
| Jamaica   | Diet low in fiber           | 2<br>(1 to 5)                | 0.12<br>(0.04 to 0.29)       | 6<br>(2 to 14)               | 0.2<br>(0.07 to 0.47)        | 2.17<br>(1.91 to 2.44)    |

| Countries | Risk factors                | 1990                         |                              | 2019                         |                              | 1990-2019                 |
|-----------|-----------------------------|------------------------------|------------------------------|------------------------------|------------------------------|---------------------------|
|           |                             | Number of deaths<br>(95% UI) | ASDR per 100,000<br>(95% UI) | Number of deaths<br>(95% UI) | ASDR per 100,000<br>(95% UI) | EAPC of ASDR<br>(95% CI)  |
| Jamaica   | Diet low in calcium         | 29<br>(20 to 40)             | 1.59<br>(1.09 to 2.17)       | 67<br>(41 to 99)             | 2.19<br>(1.35 to 3.24)       | 1.46<br>(1.15 to 1.77)    |
| Jamaica   | Diet high in red meat       | 4<br>(0 to 11)               | 0.23<br>(0.02 to 0.62)       | 10<br>(1 to 28)              | 0.34<br>(0.03 to 0.93)       | 1.2<br>(0.87 to 1.54)     |
| Jamaica   | Diet high in processed meat | 2<br>(0 to 4)                | 0.12<br>(0.02 to 0.23)       | 6<br>(1 to 12)               | 0.2<br>(0.03 to 0.39)        | 1.71<br>(1.39 to 2.04)    |
| Jamaica   | Diet low in whole grains    | 32<br>(12 to 42)             | 1.79<br>(0.69 to 2.31)       | 85<br>(32 to 119)            | 2.8<br>(1.07 to 3.93)        | 1.68<br>(1.38 to 1.98)    |
| Japan     | All dietary risks           | 9693<br>(7087 to 11881)      | 5.91<br>(4.32 to 7.24)       | 20829<br>(14658 to 26068)    | 5.24<br>(3.8 to 6.46)        | -0.4<br>(-0.46 to -0.34)  |
| Japan     | Diet low in milk            | 4172<br>(1565 to 5755)       | 2.55<br>(0.96 to 3.52)       | 9488<br>(3559 to 12779)      | 2.38<br>(0.89 to 3.17)       | -0.29<br>(-0.35 to -0.23) |
| Japan     | Diet low in fiber           | 521<br>(198 to 1095)         | 0.33<br>(0.12 to 0.68)       | 1296<br>(517 to 2630)        | 0.32<br>(0.12 to 0.64)       | 0.15<br>(0.02 to 0.28)    |
| Japan     | Diet low in calcium         | 4101<br>(2661 to 5820)       | 2.51<br>(1.63 to 3.57)       | 8636<br>(5464 to 12519)      | 2.11<br>(1.32 to 3.06)       | -0.42<br>(-0.52 to -0.33) |
| Japan     | Diet high in red meat       | 805<br>(77 to 2136)          | 0.49<br>(0.05 to 1.3)        | 1639<br>(164 to 4326)        | 0.43<br>(0.04 to 1.11)       | -0.77<br>(-0.86 to -0.67) |
| Japan     | Diet high in processed meat | 1396<br>(374 to 2174)        | 0.82<br>(0.22 to 1.28)       | 2639<br>(705 to 4168)        | 0.76<br>(0.22 to 1.18)       | -0.39<br>(-0.6 to -0.18)  |
| Japan     | Diet low in whole grains    | 4172<br>(1565 to 5755)       | 2.55<br>(0.96 to 3.52)       | 9488<br>(3559 to 12779)      | 2.38<br>(0.89 to 3.17)       | -0.29<br>(-0.35 to -0.23) |
| Jordan    | All dietary risks           | 60<br>(44 to 77)             | 4.92<br>(3.55 to 6.27)       | 277<br>(197 to 354)          | 4.86<br>(3.48 to 6.12)       | 0.02<br>(-0.07 to 0.1)    |
| Jordan    | Diet low in milk            | 32<br>(16 to 44)             | 2.65<br>(1.32 to 3.57)       | 161<br>(78 to 211)           | 2.79<br>(1.37 to 3.66)       | 0.35<br>(0.25 to 0.45)    |
| Jordan    | Diet low in fiber           | 3<br>(1 to 7)                | 0.29<br>(0.1 to 0.61)        | 13<br>(4 to 29)              | 0.23<br>(0.08 to 0.5)        | -1.2<br>(-1.34 to -1.06)  |
| Jordan    | Diet low in calcium         | 28<br>(20 to 38)             | 2.35<br>(1.69 to 3.18)       | 117<br>(78 to 166)           | 2.09<br>(1.41 to 2.96)       | -0.52<br>(-0.6 to -0.43)  |
| Jordan    | Diet high in red meat       | 4<br>(0 to 10)               | 0.28<br>(0.03 to 0.77)       | 17<br>(2 to 47)              | 0.29<br>(0.03 to 0.8)        | 0.48<br>(0.31 to 0.64)    |
| Jordan    | Diet high in processed meat | 1<br>(0 to 3)                | 0.11<br>(0.03 to 0.2)        | 8<br>(2 to 14)               | 0.12<br>(0.03 to 0.23)       | 0.72<br>(0.58 to 0.85)    |
| Jordan    | Diet low in whole grains    | 32<br>(16 to 44)             | 2.65<br>(1.32 to 3.57)       | 161<br>(78 to 211)           | 2.79<br>(1.37 to 3.66)       | 0.35<br>(0.25 to 0.45)    |

| Countries  | Risk factors                | 1990                         |                              | 2019                         |                              | 1990-2019                 |
|------------|-----------------------------|------------------------------|------------------------------|------------------------------|------------------------------|---------------------------|
|            |                             | Number of deaths<br>(95% UI) | ASDR per 100,000<br>(95% UI) | Number of deaths<br>(95% UI) | ASDR per 100,000<br>(95% UI) | EAPC of ASDR<br>(95% CI)  |
| Kazakhstan | All dietary risks           | 693<br>(519 to 832)          | 5.57<br>(4.16 to 6.72)       | 747<br>(534 to 947)          | 4.59<br>(3.28 to 5.8)        | -0.5<br>(-0.63 to -0.37)  |
| Kazakhstan | Diet low in milk            | 401<br>(198 to 497)          | 3.24<br>(1.6 to 4)           | 471<br>(239 to 609)          | 2.9<br>(1.47 to 3.73)        | -0.14<br>(-0.29 to 0.01)  |
| Kazakhstan | Diet low in fiber           | 39<br>(13 to 87)             | 0.32<br>(0.11 to 0.7)        | 31<br>(10 to 73)             | 0.2<br>(0.07 to 0.47)        | -2.15<br>(-2.74 to -1.55) |
| Kazakhstan | Diet low in calcium         | 131<br>(61 to 237)           | 1.07<br>(0.5 to 1.93)        | 78<br>(38 to 134)            | 0.51<br>(0.25 to 0.88)       | -2.95<br>(-3.37 to -2.53) |
| Kazakhstan | Diet high in red meat       | 152<br>(45 to 259)           | 1.18<br>(0.34 to 2.05)       | 171<br>(50 to 299)           | 1.02<br>(0.29 to 1.81)       | 0.11<br>(-0.47 to 0.7)    |
| Kazakhstan | Diet high in processed meat | 79<br>(15 to 128)            | 0.62<br>(0.12 to 1.02)       | 91<br>(15 to 152)            | 0.55<br>(0.09 to 0.91)       | -0.17<br>(-0.39 to 0.06)  |
| Kazakhstan | Diet low in whole grains    | 401<br>(198 to 497)          | 3.24<br>(1.6 to 4)           | 471<br>(239 to 609)          | 2.9<br>(1.47 to 3.73)        | -0.14<br>(-0.29 to 0.01)  |
| Kenya      | All dietary risks           | 127<br>(82 to 171)           | 1.69<br>(1.1 to 2.28)        | 483<br>(323 to 659)          | 2.45<br>(1.67 to 3.28)       | 1.55<br>(1.39 to 1.71)    |
| Kenya      | Diet low in milk            | 55<br>(22 to 82)             | 0.72<br>(0.29 to 1.08)       | 237<br>(90 to 342)           | 1.19<br>(0.45 to 1.72)       | 2.05<br>(1.86 to 2.24)    |
| Kenya      | Diet low in fiber           | 3<br>(1 to 7)                | 0.04<br>(0.02 to 0.1)        | 9<br>(4 to 19)               | 0.05<br>(0.02 to 0.1)        | 0.52<br>(0.39 to 0.65)    |
| Kenya      | Diet low in calcium         | 70<br>(42 to 98)             | 0.94<br>(0.56 to 1.31)       | 224<br>(142 to 338)          | 1.17<br>(0.76 to 1.73)       | 0.92<br>(0.79 to 1.04)    |
| Kenya      | Diet high in red meat       | 9<br>(1 to 26)               | 0.12<br>(0.01 to 0.33)       | 39<br>(4 to 107)             | 0.19<br>(0.02 to 0.52)       | 2.08<br>(1.87 to 2.3)     |
| Kenya      | Diet high in processed meat | 6<br>(1 to 12)               | 0.08<br>(0.01 to 0.15)       | 28<br>(5 to 53)              | 0.13<br>(0.02 to 0.25)       | 2.28<br>(2.07 to 2.49)    |
| Kenya      | Diet low in whole grains    | 55<br>(22 to 82)             | 0.72<br>(0.29 to 1.08)       | 237<br>(90 to 342)           | 1.19<br>(0.45 to 1.72)       | 2.05<br>(1.86 to 2.24)    |
| Kiribati   | All dietary risks           | 2<br>(1 to 2)                | 4.56<br>(3.49 to 5.69)       | 3<br>(2 to 4)                | 4.42<br>(3.21 to 5.91)       | -0.29<br>(-0.36 to -0.23) |
| Kiribati   | Diet low in milk            | 1<br>(0 to 1)                | 1.84<br>(0.7 to 2.56)        | 1<br>(0 to 2)                | 1.8<br>(0.63 to 2.59)        | -0.26<br>(-0.32 to -0.2)  |
| Kiribati   | Diet low in fiber           | 0<br>(0 to 0)                | 0.1<br>(0.04 to 0.26)        | 0<br>(0 to 0)                | 0.08<br>(0.03 to 0.21)       | -1.13<br>(-1.3 to -0.97)  |
| Kiribati   | Diet low in calcium         | 1<br>(1 to 1)                | 2.98<br>(2.27 to 3.86)       | 2<br>(1 to 2)                | 2.86<br>(2.04 to 3.88)       | -0.33<br>(-0.39 to -0.26) |



| Countries  | Risk factors                | 1990                         |                              | 2019                         |                              | 1990-2019                 |
|------------|-----------------------------|------------------------------|------------------------------|------------------------------|------------------------------|---------------------------|
|            |                             | Number of deaths<br>(95% UI) | ASDR per 100,000<br>(95% UI) | Number of deaths<br>(95% UI) | ASDR per 100,000<br>(95% UI) | EAPC of ASDR<br>(95% CI)  |
| Kiribati   | Diet high in red meat       | 0<br>(0 to 0)                | 0.23<br>(0.02 to 0.64)       | 0<br>(0 to 0)                | 0.23<br>(0.02 to 0.63)       | -0.21<br>(-0.28 to -0.13) |
| Kiribati   | Diet high in processed meat | 0<br>(0 to 0)                | 0.08<br>(0.03 to 0.15)       | 0<br>(0 to 0)                | 0.09<br>(0.03 to 0.17)       | 0.11<br>(0.06 to 0.16)    |
| Kiribati   | Diet low in whole grains    | 1<br>(0 to 1)                | 1.84<br>(0.7 to 2.56)        | 1<br>(0 to 2)                | 1.8<br>(0.63 to 2.59)        | -0.26<br>(-0.32 to -0.2)  |
| Kuwait     | All dietary risks           | 12<br>(8 to 15)              | 2.19<br>(1.49 to 2.81)       | 62<br>(40 to 83)             | 2.82<br>(1.81 to 3.78)       | 1.68<br>(1.28 to 2.07)    |
| Kuwait     | Diet low in milk            | 7<br>(2 to 9)                | 1.25<br>(0.46 to 1.66)       | 37<br>(14 to 51)             | 1.7<br>(0.63 to 2.35)        | 1.88<br>(1.42 to 2.34)    |
| Kuwait     | Diet low in fiber           | 1<br>(0 to 2)                | 0.14<br>(0.05 to 0.32)       | 3<br>(1 to 7)                | 0.13<br>(0.04 to 0.31)       | 0.42<br>(0.04 to 0.81)    |
| Kuwait     | Diet low in calcium         | 4<br>(2 to 6)                | 0.69<br>(0.38 to 1.12)       | 17<br>(8 to 30)              | 0.8<br>(0.4 to 1.4)          | 1.18<br>(0.84 to 1.51)    |
| Kuwait     | Diet high in red meat       | 2<br>(0 to 4)                | 0.28<br>(0.03 to 0.68)       | 9<br>(1 to 21)               | 0.37<br>(0.04 to 0.94)       | 1.75<br>(1.15 to 2.36)    |
| Kuwait     | Diet high in processed meat | 0<br>(0 to 1)                | 0.07<br>(0.02 to 0.12)       | 2<br>(1 to 5)                | 0.11<br>(0.02 to 0.2)        | 2.31<br>(1.71 to 2.9)     |
| Kuwait     | Diet low in whole grains    | 7<br>(2 to 9)                | 1.25<br>(0.46 to 1.66)       | 37<br>(14 to 51)             | 1.7<br>(0.63 to 2.35)        | 1.88<br>(1.42 to 2.34)    |
| Kyrgyzstan | All dietary risks           | 120<br>(87 to 147)           | 3.97<br>(2.9 to 4.89)        | 113<br>(79 to 143)           | 2.7<br>(1.9 to 3.42)         | -1.5<br>(-1.7 to -1.29)   |
| Kyrgyzstan | Diet low in milk            | 72<br>(36 to 89)             | 2.4<br>(1.19 to 2.96)        | 74<br>(37 to 95)             | 1.76<br>(0.89 to 2.28)       | -1.14<br>(-1.35 to -0.92) |
| Kyrgyzstan | Diet low in fiber           | 6<br>(2 to 15)               | 0.21<br>(0.07 to 0.5)        | 4<br>(1 to 10)               | 0.11<br>(0.04 to 0.24)       | -3.22<br>(-3.5 to -2.94)  |
| Kyrgyzstan | Diet low in calcium         | 24<br>(11 to 44)             | 0.79<br>(0.37 to 1.46)       | 21<br>(10 to 37)             | 0.52<br>(0.25 to 0.91)       | -1.97<br>(-2.19 to -1.76) |
| Kyrgyzstan | Diet high in red meat       | 21<br>(5 to 41)              | 0.7<br>(0.16 to 1.35)        | 15<br>(2 to 33)              | 0.34<br>(0.05 to 0.78)       | -2.69<br>(-3.18 to -2.2)  |
| Kyrgyzstan | Diet high in processed meat | 13<br>(2 to 22)              | 0.43<br>(0.07 to 0.71)       | 13<br>(2 to 22)              | 0.3<br>(0.04 to 0.51)        | -1.32<br>(-1.62 to -1.01) |
| Kyrgyzstan | Diet low in whole grains    | 72<br>(36 to 89)             | 2.4<br>(1.19 to 2.96)        | 74<br>(37 to 95)             | 1.76<br>(0.89 to 2.28)       | -1.14<br>(-1.35 to -0.92) |

| Countries                        | Risk factors                | 1990                         |                              | 2019                         |                              | 1990-2019                 |
|----------------------------------|-----------------------------|------------------------------|------------------------------|------------------------------|------------------------------|---------------------------|
|                                  |                             | Number of deaths<br>(95% UI) | ASDR per 100,000<br>(95% UI) | Number of deaths<br>(95% UI) | ASDR per 100,000<br>(95% UI) | EAPC of ASDR<br>(95% CI)  |
| Lao People's Democratic Republic | All dietary risks           | 90<br>(59 to 125)            | 4.48<br>(3.06 to 6.17)       | 220<br>(153 to 300)          | 5.41<br>(3.75 to 7.23)       | 0.46<br>(0.39 to 0.53)    |
| Lao People's Democratic Republic | Diet low in milk            | 24<br>(10 to 40)             | 1.21<br>(0.47 to 1.99)       | 61<br>(24 to 99)             | 1.5<br>(0.58 to 2.43)        | 0.58<br>(0.51 to 0.65)    |
| Lao People's Democratic Republic | Diet low in fiber           | 18<br>(9 to 29)              | 0.9<br>(0.46 to 1.42)        | 32<br>(15 to 53)             | 0.81<br>(0.38 to 1.3)        | -0.71<br>(-0.82 to -0.6)  |
| Lao People's Democratic Republic | Diet low in calcium         | 58<br>(37 to 83)             | 2.91<br>(1.92 to 4.15)       | 143<br>(98 to 195)           | 3.54<br>(2.42 to 4.77)       | 0.49<br>(0.42 to 0.56)    |
| Lao People's Democratic Republic | Diet high in red meat       | 4<br>(0 to 12)               | 0.19<br>(0.02 to 0.56)       | 14<br>(1 to 40)              | 0.33<br>(0.03 to 0.94)       | 1.75<br>(1.7 to 1.8)      |
| Lao People's Democratic Republic | Diet high in processed meat | 1<br>(1 to 2)                | 0.06<br>(0.03 to 0.09)       | 4<br>(2 to 6)                | 0.08<br>(0.04 to 0.14)       | 1.33<br>(1.27 to 1.39)    |
| Lao People's Democratic Republic | Diet low in whole grains    | 24<br>(10 to 40)             | 1.21<br>(0.47 to 1.99)       | 61<br>(24 to 99)             | 1.5<br>(0.58 to 2.43)        | 0.58<br>(0.51 to 0.65)    |
| Latvia                           | All dietary risks           | 220<br>(159 to 272)          | 6.16<br>(4.45 to 7.6)        | 230<br>(154 to 304)          | 5.42<br>(3.61 to 7.19)       | -0.53<br>(-0.78 to -0.28) |
| Latvia                           | Diet low in milk            | 131<br>(60 to 164)           | 3.66<br>(1.69 to 4.57)       | 128<br>(47 to 174)           | 3.01<br>(1.1 to 4.12)        | -0.77<br>(-1 to -0.53)    |
| Latvia                           | Diet low in fiber           | 11<br>(4 to 26)              | 0.31<br>(0.1 to 0.71)        | 13<br>(4 to 28)              | 0.3<br>(0.1 to 0.65)         | -0.55<br>(-1.02 to -0.07) |
| Latvia                           | Diet low in calcium         | 27<br>(13 to 46)             | 0.75<br>(0.35 to 1.29)       | 31<br>(13 to 55)             | 0.7<br>(0.3 to 1.24)         | -0.78<br>(-1.36 to -0.19) |
| Latvia                           | Diet high in red meat       | 29<br>(5 to 65)              | 0.81<br>(0.13 to 1.82)       | 27<br>(3 to 68)              | 0.67<br>(0.08 to 1.62)       | -0.44<br>(-0.81 to -0.07) |
| Latvia                           | Diet high in processed meat | 53<br>(19 to 95)             | 1.48<br>(0.54 to 2.64)       | 60<br>(23 to 105)            | 1.43<br>(0.54 to 2.58)       | -0.11<br>(-0.39 to 0.17)  |
| Latvia                           | Diet low in whole grains    | 131<br>(60 to 164)           | 3.66<br>(1.69 to 4.57)       | 128<br>(47 to 174)           | 3.01<br>(1.1 to 4.12)        | -0.77<br>(-1 to -0.53)    |
| Lebanon                          | All dietary risks           | 86<br>(57 to 115)            | 4.26<br>(2.84 to 5.68)       | 285<br>(185 to 390)          | 5.5<br>(3.57 to 7.55)        | 1.46<br>(1.25 to 1.66)    |

| Countries | Risk factors                | 1990                         |                              | 2019                         |                              | 1990-2019                |
|-----------|-----------------------------|------------------------------|------------------------------|------------------------------|------------------------------|--------------------------|
|           |                             | Number of deaths<br>(95% UI) | ASDR per 100,000<br>(95% UI) | Number of deaths<br>(95% UI) | ASDR per 100,000<br>(95% UI) | EAPC of ASDR<br>(95% CI) |
| Lebanon   | Diet low in milk            | 58<br>(29 to 80)             | 2.85<br>(1.43 to 3.89)       | 194<br>(90 to 272)           | 3.73<br>(1.73 to 5.25)       | 1.45<br>(1.27 to 1.64)   |
| Lebanon   | Diet low in fiber           | 1<br>(1 to 2)                | 0.05<br>(0.03 to 0.12)       | 5<br>(2 to 12)               | 0.09<br>(0.04 to 0.22)       | 2.84<br>(2.43 to 3.24)   |
| Lebanon   | Diet low in calcium         | 26<br>(14 to 45)             | 1.33<br>(0.72 to 2.25)       | 81<br>(42 to 140)            | 1.57<br>(0.82 to 2.71)       | 1.33<br>(1.02 to 1.64)   |
| Lebanon   | Diet high in red meat       | 7<br>(1 to 20)               | 0.35<br>(0.03 to 0.99)       | 26<br>(2 to 71)              | 0.5<br>(0.04 to 1.37)        | 1.8<br>(1.59 to 2)       |
| Lebanon   | Diet high in processed meat | 3<br>(1 to 5)                | 0.12<br>(0.03 to 0.23)       | 9<br>(2 to 16)               | 0.16<br>(0.04 to 0.31)       | 1.46<br>(1.29 to 1.62)   |
| Lebanon   | Diet low in whole grains    | 58<br>(29 to 80)             | 2.85<br>(1.43 to 3.89)       | 194<br>(90 to 272)           | 3.73<br>(1.73 to 5.25)       | 1.45<br>(1.27 to 1.64)   |
| Lesotho   | All dietary risks           | 22<br>(16 to 33)             | 2.53<br>(1.85 to 3.75)       | 50<br>(35 to 69)             | 4.43<br>(3.12 to 6.06)       | 2.34<br>(2.16 to 2.51)   |
| Lesotho   | Diet low in milk            | 7<br>(3 to 12)               | 0.82<br>(0.31 to 1.36)       | 16<br>(6 to 25)              | 1.38<br>(0.49 to 2.2)        | 2.14<br>(2 to 2.3)       |
| Lesotho   | Diet low in fiber           | 0<br>(0 to 0)                | 0.02<br>(0.01 to 0.03)       | 0<br>(0 to 0)                | 0.03<br>(0.02 to 0.04)       | 1.79<br>(1.65 to 1.92)   |
| Lesotho   | Diet low in calcium         | 16<br>(11 to 23)             | 1.77<br>(1.25 to 2.6)        | 35<br>(24 to 48)             | 3.12<br>(2.15 to 4.23)       | 2.36<br>(2.18 to 2.55)   |
| Lesotho   | Diet high in red meat       | 1<br>(0 to 4)                | 0.17<br>(0.01 to 0.48)       | 4<br>(0 to 10)               | 0.3<br>(0.02 to 0.87)        | 2.54<br>(2.38 to 2.71)   |
| Lesotho   | Diet high in processed meat | 1<br>(0 to 1)                | 0.08<br>(0.01 to 0.16)       | 2<br>(0 to 4)                | 0.16<br>(0.02 to 0.32)       | 2.93<br>(2.7 to 3.15)    |
| Lesotho   | Diet low in whole grains    | 7<br>(3 to 12)               | 0.82<br>(0.31 to 1.36)       | 16<br>(6 to 25)              | 1.38<br>(0.49 to 2.2)        | 2.14<br>(2 to 2.3)       |
| Liberia   | All dietary risks           | 29<br>(22 to 36)             | 2.8<br>(2.18 to 3.48)        | 51<br>(34 to 74)             | 2.86<br>(1.89 to 4.2)        | 0.5<br>(0.2 to 0.81)     |
| Liberia   | Diet low in milk            | 10<br>(4 to 14)              | 0.98<br>(0.38 to 1.39)       | 18<br>(7 to 29)              | 1<br>(0.37 to 1.6)           | 0.5<br>(0.21 to 0.8)     |
| Liberia   | Diet low in fiber           | 2<br>(1 to 4)                | 0.19<br>(0.06 to 0.36)       | 5<br>(2 to 9)                | 0.26<br>(0.09 to 0.49)       | 1.08<br>(0.91 to 1.26)   |
| Liberia   | Diet low in calcium         | 18<br>(14 to 24)             | 1.81<br>(1.38 to 2.29)       | 33<br>(21 to 49)             | 1.83<br>(1.16 to 2.74)       | 0.48<br>(0.17 to 0.79)   |
| Liberia   | Diet high in red meat       | 1<br>(0 to 3)                | 0.1<br>(0.01 to 0.24)        | 2<br>(0 to 4)                | 0.08<br>(0.01 to 0.23)       | 0.29<br>(-0.23 to 0.8)   |

| Countries  | Risk factors                | 1990                         |                              | 2019                         |                              | 1990-2019                 |
|------------|-----------------------------|------------------------------|------------------------------|------------------------------|------------------------------|---------------------------|
|            |                             | Number of deaths<br>(95% UI) | ASDR per 100,000<br>(95% UI) | Number of deaths<br>(95% UI) | ASDR per 100,000<br>(95% UI) | EAPC of ASDR<br>(95% CI)  |
| Liberia    | Diet high in processed meat | 2<br>(0 to 3)                | 0.16<br>(0.02 to 0.3)        | 3<br>(0 to 6)                | 0.15<br>(0.02 to 0.31)       | 0.48<br>(0.04 to 0.93)    |
| Liberia    | Diet low in whole grains    | 10<br>(4 to 14)              | 0.98<br>(0.38 to 1.39)       | 18<br>(7 to 29)              | 1<br>(0.37 to 1.6)           | 0.5<br>(0.21 to 0.8)      |
| Libya      | All dietary risks           | 72<br>(46 to 106)            | 4.01<br>(2.59 to 5.88)       | 212<br>(134 to 294)          | 4.28<br>(2.73 to 5.86)       | 0.3<br>(0.19 to 0.42)     |
| Libya      | Diet low in milk            | 44<br>(20 to 66)             | 2.42<br>(1.13 to 3.65)       | 123<br>(54 to 180)           | 2.48<br>(1.07 to 3.53)       | 0.3<br>(0.16 to 0.44)     |
| Libya      | Diet low in fiber           | 2<br>(1 to 4)                | 0.09<br>(0.03 to 0.25)       | 8<br>(3 to 19)               | 0.17<br>(0.05 to 0.38)       | 1.53<br>(1.24 to 1.83)    |
| Libya      | Diet low in calcium         | 27<br>(15 to 45)             | 1.51<br>(0.85 to 2.53)       | 86<br>(52 to 131)            | 1.76<br>(1.08 to 2.65)       | 0.3<br>(0.13 to 0.48)     |
| Libya      | Diet high in red meat       | 6<br>(0 to 18)               | 0.34<br>(0.02 to 0.99)       | 15<br>(1 to 41)              | 0.29<br>(0.03 to 0.81)       | -0.26<br>(-0.46 to -0.06) |
| Libya      | Diet high in processed meat | 2<br>(0 to 5)                | 0.12<br>(0.03 to 0.24)       | 6<br>(1 to 12)               | 0.12<br>(0.03 to 0.23)       | 0.28<br>(0.07 to 0.49)    |
| Libya      | Diet low in whole grains    | 44<br>(20 to 66)             | 2.42<br>(1.13 to 3.65)       | 123<br>(54 to 180)           | 2.48<br>(1.07 to 3.53)       | 0.3<br>(0.16 to 0.44)     |
| Lithuania  | All dietary risks           | 265<br>(191 to 324)          | 5.91<br>(4.25 to 7.21)       | 322<br>(209 to 421)          | 5.32<br>(3.45 to 7)          | -0.36<br>(-0.56 to -0.16) |
| Lithuania  | Diet low in milk            | 143<br>(60 to 180)           | 3.18<br>(1.34 to 4.02)       | 168<br>(62 to 228)           | 2.76<br>(1.01 to 3.76)       | -0.5<br>(-0.67 to -0.33)  |
| Lithuania  | Diet low in fiber           | 3<br>(2 to 8)                | 0.08<br>(0.04 to 0.18)       | 7<br>(3 to 18)               | 0.12<br>(0.05 to 0.29)       | 1.8<br>(1.21 to 2.39)     |
| Lithuania  | Diet low in calcium         | 56<br>(28 to 99)             | 1.24<br>(0.62 to 2.21)       | 52<br>(23 to 92)             | 0.82<br>(0.37 to 1.45)       | -1.68<br>(-1.97 to -1.38) |
| Lithuania  | Diet high in red meat       | 42<br>(9 to 85)              | 0.94<br>(0.2 to 1.9)         | 53<br>(10 to 115)            | 0.91<br>(0.18 to 1.92)       | 0.24<br>(-0.06 to 0.54)   |
| Lithuania  | Diet high in processed meat | 62<br>(23 to 112)            | 1.38<br>(0.51 to 2.49)       | 84<br>(29 to 150)            | 1.41<br>(0.48 to 2.53)       | 0.13<br>(-0.1 to 0.37)    |
| Lithuania  | Diet low in whole grains    | 143<br>(60 to 180)           | 3.18<br>(1.34 to 4.02)       | 168<br>(62 to 228)           | 2.76<br>(1.01 to 3.76)       | -0.5<br>(-0.67 to -0.33)  |
| Luxembourg | All dietary risks           | 48<br>(34 to 59)             | 8.74<br>(6.4 to 10.76)       | 54<br>(38 to 69)             | 5.07<br>(3.62 to 6.47)       | -2.06<br>(-2.26 to -1.86) |
| Luxembourg | Diet low in milk            | 23<br>(9 to 30)              | 4.26<br>(1.59 to 5.58)       | 27<br>(10 to 36)             | 2.49<br>(0.93 to 3.38)       | -2<br>(-2.15 to -1.86)    |

| Countries  | Risk factors                | 1990                         |                              | 2019                         |                              | 1990-2019                 |
|------------|-----------------------------|------------------------------|------------------------------|------------------------------|------------------------------|---------------------------|
|            |                             | Number of deaths<br>(95% UI) | ASDR per 100,000<br>(95% UI) | Number of deaths<br>(95% UI) | ASDR per 100,000<br>(95% UI) | EAPC of ASDR<br>(95% CI)  |
| Luxembourg | Diet low in fiber           | 4<br>(1 to 7)                | 0.67<br>(0.23 to 1.36)       | 4<br>(1 to 8)                | 0.32<br>(0.11 to 0.69)       | -2.52<br>(-2.8 to -2.25)  |
| Luxembourg | Diet low in calcium         | 6<br>(3 to 11)               | 1.11<br>(0.51 to 1.92)       | 6<br>(3 to 9)                | 0.51<br>(0.25 to 0.85)       | -2.69<br>(-2.92 to -2.47) |
| Luxembourg | Diet high in red meat       | 12<br>(3 to 20)              | 2.14<br>(0.62 to 3.65)       | 14<br>(4 to 24)              | 1.36<br>(0.43 to 2.34)       | -1.94<br>(-2.22 to -1.65) |
| Luxembourg | Diet high in processed meat | 10<br>(4 to 15)              | 1.82<br>(0.66 to 2.83)       | 11<br>(4 to 18)              | 1.09<br>(0.38 to 1.73)       | -1.94<br>(-2.17 to -1.71) |
| Luxembourg | Diet low in whole grains    | 23<br>(9 to 30)              | 4.26<br>(1.59 to 5.58)       | 27<br>(10 to 36)             | 2.49<br>(0.93 to 3.38)       | -2<br>(-2.15 to -1.86)    |
| Madagascar | All dietary risks           | 123<br>(93 to 155)           | 2.57<br>(1.97 to 3.21)       | 273<br>(187 to 383)          | 2.74<br>(1.9 to 3.79)        | 0.12<br>(0.04 to 0.2)     |
| Madagascar | Diet low in milk            | 44<br>(17 to 64)             | 0.92<br>(0.34 to 1.32)       | 94<br>(34 to 152)            | 0.94<br>(0.36 to 1.49)       | -0.01<br>(-0.09 to 0.07)  |
| Madagascar | Diet low in fiber           | 7<br>(2 to 15)               | 0.15<br>(0.05 to 0.32)       | 15<br>(5 to 34)              | 0.16<br>(0.05 to 0.35)       | -0.07<br>(-0.29 to 0.15)  |
| Madagascar | Diet low in calcium         | 76<br>(58 to 97)             | 1.59<br>(1.22 to 2.02)       | 175<br>(121 to 244)          | 1.77<br>(1.23 to 2.46)       | 0.27<br>(0.18 to 0.36)    |
| Madagascar | Diet high in red meat       | 9<br>(1 to 24)               | 0.18<br>(0.01 to 0.48)       | 15<br>(1 to 44)              | 0.15<br>(0.01 to 0.41)       | -0.72<br>(-0.86 to -0.59) |
| Madagascar | Diet high in processed meat | 5<br>(1 to 10)               | 0.1<br>(0.02 to 0.19)        | 11<br>(2 to 23)              | 0.11<br>(0.01 to 0.21)       | 0.11<br>(0.04 to 0.18)    |
| Madagascar | Diet low in whole grains    | 44<br>(17 to 64)             | 0.92<br>(0.34 to 1.32)       | 94<br>(34 to 152)            | 0.94<br>(0.36 to 1.49)       | -0.01<br>(-0.09 to 0.07)  |
| Malawi     | All dietary risks           | 63<br>(49 to 78)             | 1.84<br>(1.42 to 2.25)       | 153<br>(110 to 197)          | 2.33<br>(1.71 to 2.97)       | 0.92<br>(0.78 to 1.07)    |
| Malawi     | Diet low in milk            | 20<br>(8 to 30)              | 0.59<br>(0.22 to 0.86)       | 50<br>(19 to 77)             | 0.76<br>(0.28 to 1.16)       | 0.99<br>(0.85 to 1.14)    |
| Malawi     | Diet low in fiber           | 0<br>(0 to 1)                | 0.01<br>(0.01 to 0.02)       | 1<br>(1 to 1)                | 0.01<br>(0.01 to 0.02)       | 0.23<br>(0.16 to 0.29)    |
| Malawi     | Diet low in calcium         | 46<br>(34 to 58)             | 1.34<br>(1.01 to 1.69)       | 108<br>(77 to 141)           | 1.65<br>(1.19 to 2.14)       | 0.82<br>(0.68 to 0.96)    |
| Malawi     | Diet high in red meat       | 2<br>(0 to 4)                | 0.05<br>(0.01 to 0.11)       | 6<br>(1 to 15)               | 0.09<br>(0.01 to 0.22)       | 2.57<br>(2.36 to 2.79)    |
| Malawi     | Diet high in processed meat | 2<br>(0 to 5)                | 0.07<br>(0.01 to 0.13)       | 7<br>(1 to 13)               | 0.1<br>(0.01 to 0.18)        | 1.41<br>(1.22 to 1.59)    |

| Countries | Risk factors                | 1990                         |                              | 2019                         |                              | 1990-2019                 |
|-----------|-----------------------------|------------------------------|------------------------------|------------------------------|------------------------------|---------------------------|
|           |                             | Number of deaths<br>(95% UI) | ASDR per 100,000<br>(95% UI) | Number of deaths<br>(95% UI) | ASDR per 100,000<br>(95% UI) | EAPC of ASDR<br>(95% CI)  |
| Malawi    | Diet low in whole grains    | 20<br>(8 to 30)              | 0.59<br>(0.22 to 0.86)       | 50<br>(19 to 77)             | 0.76<br>(0.28 to 1.16)       | 0.99<br>(0.85 to 1.14)    |
| Malaysia  | All dietary risks           | 564<br>(448 to 681)          | 6.74<br>(5.28 to 8.23)       | 1857<br>(1370 to 2408)       | 7.84<br>(5.82 to 10.13)      | -0.03<br>(-0.24 to 0.18)  |
| Malaysia  | Diet low in milk            | 206<br>(78 to 283)           | 2.45<br>(0.93 to 3.42)       | 734<br>(273 to 1043)         | 3.08<br>(1.13 to 4.38)       | 0.2<br>(-0.03 to 0.43)    |
| Malaysia  | Diet low in fiber           | 79<br>(35 to 123)            | 0.94<br>(0.42 to 1.49)       | 180<br>(69 to 342)           | 0.78<br>(0.3 to 1.46)        | -1.13<br>(-1.33 to -0.94) |
| Malaysia  | Diet low in calcium         | 331<br>(258 to 419)          | 3.97<br>(3.06 to 5.06)       | 1060<br>(763 to 1414)        | 4.51<br>(3.26 to 6.02)       | -0.08<br>(-0.29 to 0.12)  |
| Malaysia  | Diet high in red meat       | 30<br>(3 to 82)              | 0.35<br>(0.03 to 0.95)       | 97<br>(10 to 263)            | 0.4<br>(0.04 to 1.09)        | -0.37<br>(-0.65 to -0.1)  |
| Malaysia  | Diet high in processed meat | 15<br>(3 to 27)              | 0.17<br>(0.03 to 0.31)       | 70<br>(10 to 136)            | 0.28<br>(0.04 to 0.54)       | 1.34<br>(1.16 to 1.52)    |
| Malaysia  | Diet low in whole grains    | 206<br>(78 to 283)           | 2.45<br>(0.93 to 3.42)       | 734<br>(273 to 1043)         | 3.08<br>(1.13 to 4.38)       | 0.2<br>(-0.03 to 0.43)    |
| Maldives  | All dietary risks           | 3<br>(2 to 4)                | 3.7<br>(2.68 to 4.79)        | 8<br>(6 to 10)               | 3.04<br>(2.15 to 3.85)       | -1.21<br>(-1.4 to -1.02)  |
| Maldives  | Diet low in milk            | 1<br>(0 to 2)                | 1.58<br>(0.6 to 2.21)        | 4<br>(1 to 5)                | 1.45<br>(0.53 to 1.98)       | -0.75<br>(-0.92 to -0.58) |
| Maldives  | Diet low in fiber           | 0<br>(0 to 0)                | 0.35<br>(0.13 to 0.65)       | 1<br>(0 to 2)                | 0.34<br>(0.13 to 0.62)       | -0.73<br>(-0.99 to -0.47) |
| Maldives  | Diet low in calcium         | 2<br>(1 to 2)                | 2.21<br>(1.54 to 2.95)       | 4<br>(3 to 5)                | 1.51<br>(1.05 to 2.06)       | -1.95<br>(-2.19 to -1.71) |
| Maldives  | Diet high in red meat       | 0<br>(0 to 0)                | 0.06<br>(0.02 to 0.12)       | 0<br>(0 to 1)                | 0.1<br>(0.02 to 0.22)        | 1.42<br>(1.3 to 1.54)     |
| Maldives  | Diet high in processed meat | 0<br>(0 to 0)                | 0.05<br>(0.03 to 0.08)       | 0<br>(0 to 0)                | 0.06<br>(0.03 to 0.09)       | -0.23<br>(-0.41 to -0.05) |
| Maldives  | Diet low in whole grains    | 1<br>(0 to 2)                | 1.58<br>(0.6 to 2.21)        | 4<br>(1 to 5)                | 1.45<br>(0.53 to 1.98)       | -0.75<br>(-0.92 to -0.58) |
| Mali      | All dietary risks           | 98<br>(76 to 122)            | 2.6<br>(2.03 to 3.22)        | 204<br>(142 to 275)          | 2.64<br>(1.85 to 3.5)        | -0.07<br>(-0.16 to 0.02)  |
| Mali      | Diet low in milk            | 42<br>(15 to 57)             | 1.1<br>(0.42 to 1.5)         | 93<br>(33 to 133)            | 1.2<br>(0.43 to 1.68)        | 0.24<br>(0.17 to 0.31)    |
| Mali      | Diet low in fiber           | 3<br>(1 to 6)                | 0.07<br>(0.03 to 0.17)       | 2<br>(1 to 5)                | 0.03<br>(0.02 to 0.07)       | -3.05<br>(-3.59 to -2.5)  |

| Countries        | Risk factors                | 1990                         |                              | 2019                         |                              | 1990-2019                 |
|------------------|-----------------------------|------------------------------|------------------------------|------------------------------|------------------------------|---------------------------|
|                  |                             | Number of deaths<br>(95% UI) | ASDR per 100,000<br>(95% UI) | Number of deaths<br>(95% UI) | ASDR per 100,000<br>(95% UI) | EAPC of ASDR<br>(95% CI)  |
| Mali             | Diet low in calcium         | 56<br>(44 to 72)             | 1.51<br>(1.19 to 1.93)       | 100<br>(67 to 142)           | 1.32<br>(0.91 to 1.85)       | -0.75<br>(-0.91 to -0.6)  |
| Mali             | Diet high in red meat       | 7<br>(1 to 18)               | 0.17<br>(0.01 to 0.47)       | 18<br>(2 to 51)              | 0.23<br>(0.02 to 0.63)       | 1.23<br>(1.14 to 1.31)    |
| Mali             | Diet high in processed meat | 6<br>(1 to 11)               | 0.15<br>(0.02 to 0.27)       | 17<br>(2 to 31)              | 0.2<br>(0.03 to 0.38)        | 1.17<br>(1.1 to 1.24)     |
| Mali             | Diet low in whole grains    | 42<br>(15 to 57)             | 1.1<br>(0.42 to 1.5)         | 93<br>(33 to 133)            | 1.2<br>(0.43 to 1.68)        | 0.24<br>(0.17 to 0.31)    |
| Malta            | All dietary risks           | 25<br>(18 to 31)             | 6.05<br>(4.45 to 7.38)       | 47<br>(33 to 59)             | 4.84<br>(3.39 to 6.12)       | -0.63<br>(-0.74 to -0.52) |
| Malta            | Diet low in milk            | 14<br>(6 to 18)              | 3.4<br>(1.52 to 4.25)        | 28<br>(14 to 37)             | 2.91<br>(1.41 to 3.78)       | -0.43<br>(-0.56 to -0.31) |
| Malta            | Diet low in fiber           | 1<br>(0 to 3)                | 0.34<br>(0.11 to 0.75)       | 2<br>(1 to 4)                | 0.17<br>(0.06 to 0.42)       | -1.52<br>(-1.94 to -1.09) |
| Malta            | Diet low in calcium         | 5<br>(3 to 9)                | 1.3<br>(0.66 to 2.26)        | 8<br>(4 to 15)               | 0.83<br>(0.39 to 1.47)       | -1.07<br>(-1.25 to -0.88) |
| Malta            | Diet high in red meat       | 3<br>(1 to 7)                | 0.81<br>(0.13 to 1.79)       | 6<br>(1 to 14)               | 0.66<br>(0.12 to 1.47)       | -0.9<br>(-1.06 to -0.73)  |
| Malta            | Diet high in processed meat | 5<br>(2 to 7)                | 1.12<br>(0.38 to 1.73)       | 9<br>(3 to 14)               | 0.94<br>(0.33 to 1.49)       | -0.56<br>(-0.71 to -0.41) |
| Malta            | Diet low in whole grains    | 14<br>(6 to 18)              | 3.4<br>(1.52 to 4.25)        | 28<br>(14 to 37)             | 2.91<br>(1.41 to 3.78)       | -0.43<br>(-0.56 to -0.31) |
| Marshall Islands | All dietary risks           | 1<br>(1 to 1)                | 4.33<br>(3.39 to 5.42)       | 1<br>(1 to 2)                | 4.79<br>(3.47 to 6.23)       | 0.4<br>(0.34 to 0.46)     |
| Marshall Islands | Diet low in milk            | 0<br>(0 to 0)                | 1.8<br>(0.69 to 2.47)        | 1<br>(0 to 1)                | 2.03<br>(0.75 to 2.84)       | 0.46<br>(0.4 to 0.52)     |
| Marshall Islands | Diet low in fiber           | 0<br>(0 to 0)                | 0.05<br>(0.03 to 0.13)       | 0<br>(0 to 0)                | 0.05<br>(0.03 to 0.11)       | -0.19<br>(-0.25 to -0.14) |
| Marshall Islands | Diet low in calcium         | 0<br>(0 to 1)                | 2.71<br>(2.04 to 3.51)       | 1<br>(1 to 1)                | 2.95<br>(2.17 to 3.92)       | 0.35<br>(0.29 to 0.4)     |
| Marshall Islands | Diet high in red meat       | 0<br>(0 to 0)                | 0.29<br>(0.03 to 0.78)       | 0<br>(0 to 0)                | 0.33<br>(0.03 to 0.92)       | 0.43<br>(0.37 to 0.49)    |
| Marshall Islands | Diet high in processed meat | 0<br>(0 to 0)                | 0.09<br>(0.03 to 0.15)       | 0<br>(0 to 0)                | 0.1<br>(0.03 to 0.19)        | 0.68<br>(0.61 to 0.74)    |
| Marshall Islands | Diet low in whole grains    | 0<br>(0 to 0)                | 1.8<br>(0.69 to 2.47)        | 1<br>(0 to 1)                | 2.03<br>(0.75 to 2.84)       | 0.46<br>(0.4 to 0.52)     |

| Countries  | Risk factors                | 1990                         |                              | 2019                         |                              | 1990-2019                 |
|------------|-----------------------------|------------------------------|------------------------------|------------------------------|------------------------------|---------------------------|
|            |                             | Number of deaths<br>(95% UI) | ASDR per 100,000<br>(95% UI) | Number of deaths<br>(95% UI) | ASDR per 100,000<br>(95% UI) | EAPC of ASDR<br>(95% CI)  |
| Mauritania | All dietary risks           | 25<br>(16 to 34)             | 2.7<br>(1.77 to 3.62)        | 48<br>(31 to 66)             | 2.59<br>(1.68 to 3.58)       | -0.06<br>(-0.19 to 0.07)  |
| Mauritania | Diet low in milk            | 14<br>(5 to 19)              | 1.48<br>(0.57 to 2.07)       | 27<br>(10 to 39)             | 1.46<br>(0.53 to 2.08)       | 0.05<br>(-0.08 to 0.18)   |
| Mauritania | Diet low in fiber           | 1<br>(0 to 3)                | 0.16<br>(0.05 to 0.36)       | 1<br>(0 to 3)                | 0.07<br>(0.03 to 0.18)       | -2.52<br>(-2.84 to -2.21) |
| Mauritania | Diet low in calcium         | 8<br>(5 to 14)               | 0.94<br>(0.52 to 1.49)       | 16<br>(9 to 27)              | 0.9<br>(0.5 to 1.44)         | -0.17<br>(-0.26 to -0.07) |
| Mauritania | Diet high in red meat       | 2<br>(0 to 7)                | 0.25<br>(0.02 to 0.7)        | 5<br>(0 to 13)               | 0.24<br>(0.02 to 0.67)       | 0.09<br>(-0.07 to 0.24)   |
| Mauritania | Diet high in processed meat | 2<br>(0 to 4)                | 0.22<br>(0.03 to 0.42)       | 4<br>(1 to 8)                | 0.23<br>(0.03 to 0.41)       | 0.3<br>(0.17 to 0.43)     |
| Mauritania | Diet low in whole grains    | 14<br>(5 to 19)              | 1.48<br>(0.57 to 2.07)       | 27<br>(10 to 39)             | 1.46<br>(0.53 to 2.08)       | 0.05<br>(-0.08 to 0.18)   |
| Mauritius  | All dietary risks           | 20<br>(15 to 24)             | 2.95<br>(2.27 to 3.5)        | 63<br>(41 to 83)             | 3.78<br>(2.49 to 4.96)       | 0.83<br>(0.73 to 0.94)    |
| Mauritius  | Diet low in milk            | 9<br>(3 to 12)               | 1.28<br>(0.47 to 1.7)        | 34<br>(12 to 48)             | 2.01<br>(0.74 to 2.84)       | 1.58<br>(1.41 to 1.75)    |
| Mauritius  | Diet low in fiber           | 3<br>(1 to 5)                | 0.47<br>(0.21 to 0.7)        | 5<br>(2 to 11)               | 0.33<br>(0.12 to 0.67)       | -1.33<br>(-1.54 to -1.12) |
| Mauritius  | Diet low in calcium         | 9<br>(7 to 13)               | 1.42<br>(1.04 to 1.86)       | 24<br>(14 to 37)             | 1.48<br>(0.88 to 2.25)       | 0.11<br>(0.01 to 0.2)     |
| Mauritius  | Diet high in red meat       | 1<br>(0 to 3)                | 0.18<br>(0.02 to 0.48)       | 5<br>(0 to 13)               | 0.28<br>(0.03 to 0.79)       | 1.42<br>(1.24 to 1.6)     |
| Mauritius  | Diet high in processed meat | 0<br>(0 to 1)                | 0.06<br>(0.03 to 0.09)       | 2<br>(1 to 3)                | 0.1<br>(0.04 to 0.17)        | 1.92<br>(1.76 to 2.08)    |
| Mauritius  | Diet low in whole grains    | 9<br>(3 to 12)               | 1.28<br>(0.47 to 1.7)        | 34<br>(12 to 48)             | 2.01<br>(0.74 to 2.84)       | 1.58<br>(1.41 to 1.75)    |
| Mexico     | All dietary risks           | 796<br>(596 to 975)          | 2.02<br>(1.51 to 2.47)       | 3112<br>(2137 to 4058)       | 2.74<br>(1.88 to 3.56)       | 1.15<br>(1.02 to 1.28)    |
| Mexico     | Diet low in milk            | 323<br>(122 to 444)          | 0.81<br>(0.31 to 1.12)       | 1323<br>(493 to 1886)        | 1.16<br>(0.43 to 1.65)       | 1.32<br>(1.22 to 1.43)    |
| Mexico     | Diet low in fiber           | 10<br>(6 to 20)              | 0.03<br>(0.02 to 0.05)       | 51<br>(26 to 110)            | 0.05<br>(0.02 to 0.1)        | 2.37<br>(2.1 to 2.63)     |
| Mexico     | Diet low in calcium         | 417<br>(301 to 554)          | 1.07<br>(0.77 to 1.42)       | 1464<br>(974 to 2092)        | 1.3<br>(0.87 to 1.85)        | 0.73<br>(0.55 to 0.92)    |



| Countries                           | Risk factors                | 1990                         |                              | 2019                         |                              | 1990-2019                 |
|-------------------------------------|-----------------------------|------------------------------|------------------------------|------------------------------|------------------------------|---------------------------|
|                                     |                             | Number of deaths<br>(95% UI) | ASDR per 100,000<br>(95% UI) | Number of deaths<br>(95% UI) | ASDR per 100,000<br>(95% UI) | EAPC of ASDR<br>(95% CI)  |
| Mexico                              | Diet high in red meat       | 101<br>(16 to 231)           | 0.25<br>(0.04 to 0.58)       | 463<br>(89 to 1017)          | 0.4<br>(0.07 to 0.89)        | 1.84<br>(1.76 to 1.92)    |
| Mexico                              | Diet high in processed meat | 41<br>(8 to 68)              | 0.1<br>(0.02 to 0.17)        | 174<br>(37 to 302)           | 0.15<br>(0.03 to 0.26)       | 1.62<br>(1.54 to 1.69)    |
| Mexico                              | Diet low in whole grains    | 323<br>(122 to 444)          | 0.81<br>(0.31 to 1.12)       | 1323<br>(493 to 1886)        | 1.16<br>(0.43 to 1.65)       | 1.32<br>(1.22 to 1.43)    |
| Micronesia<br>(Federated States of) | All dietary risks           | 2<br>(1 to 3)                | 4.5<br>(3.37 to 5.85)        | 3<br>(2 to 4)                | 5.12<br>(3.53 to 6.81)       | 0.38<br>(0.35 to 0.41)    |
| Micronesia<br>(Federated States of) | Diet low in milk            | 1<br>(0 to 1)                | 1.87<br>(0.71 to 2.64)       | 1<br>(0 to 2)                | 2.16<br>(0.8 to 3.12)        | 0.44<br>(0.41 to 0.47)    |
| Micronesia<br>(Federated States of) | Diet low in fiber           | 0<br>(0 to 0)                | 0.06<br>(0.03 to 0.14)       | 0<br>(0 to 0)                | 0.05<br>(0.03 to 0.12)       | -0.21<br>(-0.26 to -0.15) |
| Micronesia<br>(Federated States of) | Diet low in calcium         | 1<br>(1 to 2)                | 2.82<br>(2.09 to 3.74)       | 2<br>(1 to 3)                | 3.17<br>(2.17 to 4.28)       | 0.34<br>(0.31 to 0.37)    |
| Micronesia<br>(Federated States of) | Diet high in red meat       | 0<br>(0 to 0)                | 0.3<br>(0.03 to 0.85)        | 0<br>(0 to 1)                | 0.35<br>(0.03 to 0.97)       | 0.37<br>(0.33 to 0.4)     |
| Micronesia<br>(Federated States of) | Diet high in processed meat | 0<br>(0 to 0)                | 0.09<br>(0.03 to 0.16)       | 0<br>(0 to 0)                | 0.11<br>(0.03 to 0.2)        | 0.66<br>(0.62 to 0.7)     |
| Micronesia<br>(Federated States of) | Diet low in whole grains    | 1<br>(0 to 1)                | 1.87<br>(0.71 to 2.64)       | 1<br>(0 to 2)                | 2.16<br>(0.8 to 3.12)        | 0.44<br>(0.41 to 0.47)    |
| Monaco                              | All dietary risks           | 5<br>(3 to 7)                | 6.83<br>(4.49 to 9.11)       | 8<br>(5 to 10)               | 7.36<br>(5.02 to 9.79)       | 0.37<br>(0.28 to 0.45)    |
| Monaco                              | Diet low in milk            | 3<br>(1 to 4)                | 3.79<br>(1.45 to 5.33)       | 4<br>(2 to 6)                | 4.04<br>(1.5 to 5.57)        | 0.34<br>(0.24 to 0.44)    |
| Monaco                              | Diet low in fiber           | 0<br>(0 to 0)                | 0.1<br>(0.05 to 0.26)        | 0<br>(0 to 0)                | 0.09<br>(0.05 to 0.19)       | -0.19<br>(-0.4 to 0.02)   |
| Monaco                              | Diet low in calcium         | 0<br>(0 to 0)                | 0.05<br>(0.04 to 0.07)       | 0<br>(0 to 0)                | 0.05<br>(0.04 to 0.06)       | 0.23<br>(0.05 to 0.41)    |

| Countries  | Risk factors                | 1990                         |                              | 2019                         |                              | 1990-2019                 |
|------------|-----------------------------|------------------------------|------------------------------|------------------------------|------------------------------|---------------------------|
|            |                             | Number of deaths<br>(95% UI) | ASDR per 100,000<br>(95% UI) | Number of deaths<br>(95% UI) | ASDR per 100,000<br>(95% UI) | EAPC of ASDR<br>(95% CI)  |
| Monaco     | Diet high in red meat       | 2<br>(1 to 3)                | 2.21<br>(0.84 to 3.73)       | 3<br>(1 to 4)                | 2.46<br>(0.99 to 4.11)       | 0.43<br>(0.37 to 0.5)     |
| Monaco     | Diet high in processed meat | 1<br>(0 to 2)                | 1.44<br>(0.48 to 2.34)       | 2<br>(1 to 3)                | 1.56<br>(0.56 to 2.56)       | 0.38<br>(0.3 to 0.47)     |
| Monaco     | Diet low in whole grains    | 3<br>(1 to 4)                | 3.79<br>(1.45 to 5.33)       | 4<br>(2 to 6)                | 4.04<br>(1.5 to 5.57)        | 0.34<br>(0.24 to 0.44)    |
| Mongolia   | All dietary risks           | 44<br>(34 to 55)             | 4.38<br>(3.41 to 5.39)       | 86<br>(63 to 115)            | 4.17<br>(3.09 to 5.46)       | -0.68<br>(-0.84 to -0.51) |
| Mongolia   | Diet low in milk            | 19<br>(9 to 25)              | 1.87<br>(0.92 to 2.46)       | 41<br>(19 to 56)             | 1.99<br>(0.94 to 2.68)       | -0.22<br>(-0.37 to -0.08) |
| Mongolia   | Diet low in fiber           | 7<br>(3 to 10)               | 0.66<br>(0.33 to 0.98)       | 10<br>(4 to 17)              | 0.5<br>(0.21 to 0.81)        | -1.6<br>(-1.84 to -1.36)  |
| Mongolia   | Diet low in calcium         | 15<br>(10 to 20)             | 1.49<br>(1.04 to 2.03)       | 21<br>(12 to 34)             | 1.06<br>(0.62 to 1.68)       | -1.78<br>(-2.02 to -1.55) |
| Mongolia   | Diet high in red meat       | 13<br>(7 to 19)              | 1.25<br>(0.64 to 1.89)       | 27<br>(13 to 43)             | 1.24<br>(0.6 to 1.96)        | -0.53<br>(-0.75 to -0.32) |
| Mongolia   | Diet high in processed meat | 3<br>(0 to 6)                | 0.3<br>(0.04 to 0.54)        | 7<br>(1 to 13)               | 0.32<br>(0.05 to 0.57)       | -0.23<br>(-0.44 to -0.02) |
| Mongolia   | Diet low in whole grains    | 19<br>(9 to 25)              | 1.87<br>(0.92 to 2.46)       | 41<br>(19 to 56)             | 1.99<br>(0.94 to 2.68)       | -0.22<br>(-0.37 to -0.08) |
| Montenegro | All dietary risks           | 24<br>(15 to 31)             | 3.9<br>(2.52 to 5.11)        | 46<br>(28 to 62)             | 4.71<br>(2.85 to 6.35)       | 0.89<br>(0.83 to 0.96)    |
| Montenegro | Diet low in milk            | 15<br>(6 to 20)              | 2.47<br>(0.93 to 3.32)       | 29<br>(11 to 40)             | 3<br>(1.11 to 4.13)          | 1<br>(0.91 to 1.08)       |
| Montenegro | Diet low in fiber           | 1<br>(0 to 2)                | 0.12<br>(0.04 to 0.32)       | 1<br>(0 to 3)                | 0.13<br>(0.05 to 0.33)       | -0.49<br>(-0.99 to 0)     |
| Montenegro | Diet low in calcium         | 2<br>(1 to 3)                | 0.31<br>(0.12 to 0.54)       | 2<br>(1 to 3)                | 0.2<br>(0.08 to 0.36)        | -2.98<br>(-3.64 to -2.32) |
| Montenegro | Diet high in red meat       | 4<br>(1 to 9)                | 0.64<br>(0.1 to 1.48)        | 9<br>(2 to 18)               | 0.9<br>(0.17 to 1.88)        | 2.08<br>(1.75 to 2.4)     |
| Montenegro | Diet high in processed meat | 5<br>(1 to 7)                | 0.74<br>(0.2 to 1.21)        | 9<br>(2 to 15)               | 0.91<br>(0.24 to 1.5)        | 1.14<br>(1 to 1.27)       |
| Montenegro | Diet low in whole grains    | 15<br>(6 to 20)              | 2.47<br>(0.93 to 3.32)       | 29<br>(11 to 40)             | 3<br>(1.11 to 4.13)          | 1<br>(0.91 to 1.08)       |
| Morocco    | All dietary risks           | 328<br>(246 to 401)          | 2.56<br>(1.91 to 3.12)       | 913<br>(618 to 1237)         | 3.14<br>(2.1 to 4.2)         | 0.6<br>(0.45 to 0.76)     |

| Countries  | Risk factors                | 1990                         |                              | 2019                         |                              | 1990-2019                 |
|------------|-----------------------------|------------------------------|------------------------------|------------------------------|------------------------------|---------------------------|
|            |                             | Number of deaths<br>(95% UI) | ASDR per 100,000<br>(95% UI) | Number of deaths<br>(95% UI) | ASDR per 100,000<br>(95% UI) | EAPC of ASDR<br>(95% CI)  |
| Morocco    | Diet low in milk            | 171<br>(87 to 223)           | 1.33<br>(0.68 to 1.74)       | 526<br>(251 to 738)          | 1.8<br>(0.87 to 2.52)        | 0.99<br>(0.83 to 1.14)    |
| Morocco    | Diet low in fiber           | 2<br>(1 to 3)                | 0.02<br>(0.01 to 0.02)       | 6<br>(4 to 8)                | 0.02<br>(0.01 to 0.03)       | 0.7<br>(0.51 to 0.89)     |
| Morocco    | Diet low in calcium         | 180<br>(135 to 229)          | 1.41<br>(1.04 to 1.79)       | 419<br>(271 to 591)          | 1.46<br>(0.94 to 2.05)       | -0.1<br>(-0.25 to 0.05)   |
| Morocco    | Diet high in red meat       | 17<br>(2 to 47)              | 0.13<br>(0.01 to 0.35)       | 60<br>(5 to 169)             | 0.2<br>(0.02 to 0.56)        | 1.53<br>(1.36 to 1.7)     |
| Morocco    | Diet high in processed meat | 5<br>(2 to 8)                | 0.04<br>(0.02 to 0.06)       | 23<br>(5 to 44)              | 0.07<br>(0.02 to 0.14)       | 2.59<br>(2.29 to 2.9)     |
| Morocco    | Diet low in whole grains    | 171<br>(87 to 223)           | 1.33<br>(0.68 to 1.74)       | 526<br>(251 to 738)          | 1.8<br>(0.87 to 2.52)        | 0.99<br>(0.83 to 1.14)    |
| Mozambique | All dietary risks           | 113<br>(88 to 139)           | 2.2<br>(1.73 to 2.7)         | 336<br>(238 to 449)          | 3.52<br>(2.48 to 4.66)       | 2.02<br>(1.88 to 2.16)    |
| Mozambique | Diet low in milk            | 44<br>(16 to 61)             | 0.85<br>(0.32 to 1.17)       | 130<br>(47 to 192)           | 1.36<br>(0.5 to 1.98)        | 2.02<br>(1.87 to 2.16)    |
| Mozambique | Diet low in fiber           | 6<br>(2 to 12)               | 0.11<br>(0.04 to 0.25)       | 6<br>(2 to 15)               | 0.07<br>(0.03 to 0.17)       | -1.9<br>(-2.28 to -1.53)  |
| Mozambique | Diet low in calcium         | 74<br>(56 to 96)             | 1.45<br>(1.1 to 1.86)        | 222<br>(151 to 303)          | 2.33<br>(1.6 to 3.15)        | 2.04<br>(1.9 to 2.17)     |
| Mozambique | Diet high in red meat       | 3<br>(1 to 7)                | 0.06<br>(0.01 to 0.13)       | 12<br>(2 to 31)              | 0.12<br>(0.02 to 0.3)        | 2.96<br>(2.82 to 3.11)    |
| Mozambique | Diet high in processed meat | 4<br>(1 to 7)                | 0.07<br>(0.01 to 0.13)       | 13<br>(2 to 28)              | 0.13<br>(0.02 to 0.27)       | 2.89<br>(2.71 to 3.07)    |
| Mozambique | Diet low in whole grains    | 44<br>(16 to 61)             | 0.85<br>(0.32 to 1.17)       | 130<br>(47 to 192)           | 1.36<br>(0.5 to 1.98)        | 2.02<br>(1.87 to 2.16)    |
| Myanmar    | All dietary risks           | 879<br>(650 to 1234)         | 3.97<br>(2.99 to 5.59)       | 2206<br>(1559 to 2907)       | 5.09<br>(3.6 to 6.68)        | 0.92<br>(0.83 to 1.01)    |
| Myanmar    | Diet low in milk            | 270<br>(103 to 415)          | 1.22<br>(0.47 to 1.84)       | 737<br>(271 to 1148)         | 1.69<br>(0.62 to 2.6)        | 1.27<br>(1.18 to 1.35)    |
| Myanmar    | Diet low in fiber           | 178<br>(93 to 276)           | 0.8<br>(0.43 to 1.25)        | 288<br>(124 to 483)          | 0.68<br>(0.29 to 1.13)       | -0.86<br>(-1.01 to -0.71) |
| Myanmar    | Diet low in calcium         | 557<br>(392 to 800)          | 2.52<br>(1.81 to 3.61)       | 1364<br>(952 to 1858)        | 3.16<br>(2.23 to 4.3)        | 0.82<br>(0.73 to 0.91)    |
| Myanmar    | Diet high in red meat       | 23<br>(4 to 57)              | 0.1<br>(0.02 to 0.25)        | 124<br>(11 to 352)           | 0.28<br>(0.03 to 0.78)       | 4.29<br>(4.01 to 4.57)    |

| Countries | Risk factors                | 1990                         |                              | 2019                         |                              | 1990-2019                 |
|-----------|-----------------------------|------------------------------|------------------------------|------------------------------|------------------------------|---------------------------|
|           |                             | Number of deaths<br>(95% UI) | ASDR per 100,000<br>(95% UI) | Number of deaths<br>(95% UI) | ASDR per 100,000<br>(95% UI) | EAPC of ASDR<br>(95% CI)  |
| Myanmar   | Diet high in processed meat | 11<br>(6 to 17)              | 0.05<br>(0.03 to 0.07)       | 36<br>(16 to 63)             | 0.08<br>(0.04 to 0.14)       | 2.19<br>(2.07 to 2.31)    |
| Myanmar   | Diet low in whole grains    | 270<br>(103 to 415)          | 1.22<br>(0.47 to 1.84)       | 737<br>(271 to 1148)         | 1.69<br>(0.62 to 2.6)        | 1.27<br>(1.18 to 1.35)    |
| Namibia   | All dietary risks           | 16<br>(12 to 21)             | 2.42<br>(1.84 to 3.06)       | 43<br>(32 to 57)             | 3.36<br>(2.53 to 4.32)       | 1.25<br>(1.16 to 1.33)    |
| Namibia   | Diet low in milk            | 6<br>(3 to 9)                | 0.97<br>(0.38 to 1.32)       | 17<br>(6 to 24)              | 1.29<br>(0.47 to 1.87)       | 1.05<br>(0.96 to 1.14)    |
| Namibia   | Diet low in fiber           | 1<br>(0 to 2)                | 0.16<br>(0.06 to 0.32)       | 3<br>(1 to 5)                | 0.21<br>(0.08 to 0.42)       | 1.19<br>(1.1 to 1.27)     |
| Namibia   | Diet low in calcium         | 10<br>(7 to 13)              | 1.44<br>(1.07 to 1.89)       | 26<br>(19 to 34)             | 2<br>(1.5 to 2.63)           | 1.25<br>(1.17 to 1.33)    |
| Namibia   | Diet high in red meat       | 1<br>(0 to 3)                | 0.19<br>(0.02 to 0.51)       | 4<br>(0 to 10)               | 0.27<br>(0.02 to 0.73)       | 1.35<br>(1.25 to 1.44)    |
| Namibia   | Diet high in processed meat | 0<br>(0 to 1)                | 0.06<br>(0.01 to 0.12)       | 1<br>(0 to 2)                | 0.09<br>(0.02 to 0.18)       | 1.58<br>(1.48 to 1.69)    |
| Namibia   | Diet low in whole grains    | 6<br>(3 to 9)                | 0.97<br>(0.38 to 1.32)       | 17<br>(6 to 24)              | 1.29<br>(0.47 to 1.87)       | 1.05<br>(0.96 to 1.14)    |
| Nauru     | All dietary risks           | 0<br>(0 to 0)                | 6.5<br>(4.11 to 9.41)        | 0<br>(0 to 0)                | 6.09<br>(4.08 to 8.23)       | -0.38<br>(-0.53 to -0.24) |
| Nauru     | Diet low in milk            | 0<br>(0 to 0)                | 2.96<br>(1.1 to 4.66)        | 0<br>(0 to 0)                | 2.71<br>(1.01 to 3.94)       | -0.47<br>(-0.69 to -0.26) |
| Nauru     | Diet low in fiber           | 0<br>(0 to 0)                | 0.04<br>(0.03 to 0.06)       | 0<br>(0 to 0)                | 0.04<br>(0.03 to 0.07)       | 0.28<br>(-0.18 to 0.75)   |
| Nauru     | Diet low in calcium         | 0<br>(0 to 0)                | 3.6<br>(2.25 to 5.43)        | 0<br>(0 to 0)                | 3.52<br>(2.35 to 4.97)       | -0.24<br>(-0.3 to -0.17)  |
| Nauru     | Diet high in red meat       | 0<br>(0 to 0)                | 0.59<br>(0.06 to 1.62)       | 0<br>(0 to 0)                | 0.49<br>(0.05 to 1.31)       | -0.85<br>(-1.27 to -0.44) |
| Nauru     | Diet high in processed meat | 0<br>(0 to 0)                | 0.16<br>(0.04 to 0.34)       | 0<br>(0 to 0)                | 0.15<br>(0.04 to 0.29)       | -0.47<br>(-0.84 to -0.11) |
| Nauru     | Diet low in whole grains    | 0<br>(0 to 0)                | 2.96<br>(1.1 to 4.66)        | 0<br>(0 to 0)                | 2.71<br>(1.01 to 3.94)       | -0.47<br>(-0.69 to -0.26) |
| Nepal     | All dietary risks           | 126<br>(81 to 180)           | 1.47<br>(0.93 to 2.14)       | 398<br>(276 to 573)          | 1.99<br>(1.39 to 2.85)       | 1.05<br>(0.84 to 1.27)    |
| Nepal     | Diet low in milk            | 42<br>(16 to 67)             | 0.49<br>(0.19 to 0.8)        | 148<br>(57 to 236)           | 0.74<br>(0.28 to 1.17)       | 1.49<br>(1.29 to 1.69)    |

| Countries   | Risk factors                | 1990                         |                              | 2019                         |                              | 1990-2019                 |
|-------------|-----------------------------|------------------------------|------------------------------|------------------------------|------------------------------|---------------------------|
|             |                             | Number of deaths<br>(95% UI) | ASDR per 100,000<br>(95% UI) | Number of deaths<br>(95% UI) | ASDR per 100,000<br>(95% UI) | EAPC of ASDR<br>(95% CI)  |
| Nepal       | Diet low in fiber           | 11<br>(4 to 22)              | 0.13<br>(0.04 to 0.26)       | 15<br>(5 to 36)              | 0.08<br>(0.03 to 0.19)       | -1.98<br>(-2.35 to -1.6)  |
| Nepal       | Diet low in calcium         | 78<br>(50 to 113)            | 0.92<br>(0.57 to 1.35)       | 234<br>(161 to 334)          | 1.18<br>(0.82 to 1.69)       | 0.83<br>(0.63 to 1.02)    |
| Nepal       | Diet high in red meat       | 7<br>(1 to 19)               | 0.08<br>(0.01 to 0.21)       | 24<br>(2 to 69)              | 0.12<br>(0.01 to 0.34)       | 1.61<br>(1.35 to 1.87)    |
| Nepal       | Diet high in processed meat | 8<br>(1 to 17)               | 0.09<br>(0.01 to 0.18)       | 33<br>(5 to 63)              | 0.16<br>(0.02 to 0.3)        | 2.03<br>(1.82 to 2.24)    |
| Nepal       | Diet low in whole grains    | 42<br>(16 to 67)             | 0.49<br>(0.19 to 0.8)        | 148<br>(57 to 236)           | 0.74<br>(0.28 to 1.17)       | 1.49<br>(1.29 to 1.69)    |
| Netherlands | All dietary risks           | 1362<br>(958 to 1704)        | 6.75<br>(4.77 to 8.44)       | 2319<br>(1627 to 2922)       | 6.5<br>(4.58 to 8.15)        | -0.13<br>(-0.25 to -0.01) |
| Netherlands | Diet low in milk            | 727<br>(271 to 962)          | 3.6<br>(1.34 to 4.74)        | 1262<br>(478 to 1660)        | 3.52<br>(1.33 to 4.63)       | -0.1<br>(-0.23 to 0.04)   |
| Netherlands | Diet low in fiber           | 149<br>(56 to 278)           | 0.73<br>(0.27 to 1.36)       | 171<br>(59 to 360)           | 0.47<br>(0.16 to 1)          | -1.7<br>(-1.82 to -1.58)  |
| Netherlands | Diet low in calcium         | 128<br>(61 to 218)           | 0.62<br>(0.3 to 1.06)        | 209<br>(96 to 355)           | 0.57<br>(0.26 to 0.96)       | 0.12<br>(-0.12 to 0.37)   |
| Netherlands | Diet high in red meat       | 297<br>(69 to 560)           | 1.49<br>(0.36 to 2.79)       | 544<br>(151 to 987)          | 1.56<br>(0.44 to 2.8)        | 0.12<br>(0.01 to 0.24)    |
| Netherlands | Diet high in processed meat | 227<br>(51 to 355)           | 1.13<br>(0.26 to 1.76)       | 416<br>(103 to 655)          | 1.18<br>(0.31 to 1.84)       | 0.15<br>(0.02 to 0.28)    |
| Netherlands | Diet low in whole grains    | 727<br>(271 to 962)          | 3.6<br>(1.34 to 4.74)        | 1262<br>(478 to 1660)        | 3.52<br>(1.33 to 4.63)       | -0.1<br>(-0.23 to 0.04)   |
| New Zealand | All dietary risks           | 402<br>(302 to 487)          | 10.4<br>(7.83 to 12.58)      | 634<br>(479 to 769)          | 7.8<br>(5.91 to 9.47)        | -1.06<br>(-1.13 to -0.98) |
| New Zealand | Diet low in milk            | 168<br>(63 to 226)           | 4.35<br>(1.63 to 5.86)       | 260<br>(98 to 340)           | 3.2<br>(1.2 to 4.18)         | -1.22<br>(-1.3 to -1.14)  |
| New Zealand | Diet low in fiber           | 23<br>(8 to 51)              | 0.59<br>(0.2 to 1.31)        | 34<br>(12 to 74)             | 0.42<br>(0.15 to 0.9)        | -0.64<br>(-0.89 to -0.38) |
| New Zealand | Diet low in calcium         | 98<br>(52 to 165)            | 2.52<br>(1.34 to 4.28)       | 205<br>(124 to 300)          | 2.5<br>(1.51 to 3.65)        | 0.03<br>(-0.22 to 0.29)   |
| New Zealand | Diet high in red meat       | 125<br>(52 to 192)           | 3.22<br>(1.34 to 4.93)       | 166<br>(62 to 262)           | 2.07<br>(0.79 to 3.24)       | -1.69<br>(-1.85 to -1.53) |
| New Zealand | Diet high in processed meat | 55<br>(13 to 86)             | 1.43<br>(0.35 to 2.22)       | 86<br>(22 to 133)            | 1.07<br>(0.28 to 1.65)       | -1.05<br>(-1.18 to -0.92) |

| Countries   | Risk factors                | 1990                         |                              | 2019                         |                              | 1990-2019                 |
|-------------|-----------------------------|------------------------------|------------------------------|------------------------------|------------------------------|---------------------------|
|             |                             | Number of deaths<br>(95% UI) | ASDR per 100,000<br>(95% UI) | Number of deaths<br>(95% UI) | ASDR per 100,000<br>(95% UI) | EAPC of ASDR<br>(95% CI)  |
| New Zealand | Diet low in whole grains    | 168<br>(63 to 226)           | 4.35<br>(1.63 to 5.86)       | 260<br>(98 to 340)           | 3.2<br>(1.2 to 4.18)         | -1.22<br>(-1.3 to -1.14)  |
| Nicaragua   | All dietary risks           | 34<br>(26 to 42)             | 2.37<br>(1.78 to 3.02)       | 144<br>(107 to 180)          | 3.66<br>(2.71 to 4.53)       | 1.52<br>(1.28 to 1.75)    |
| Nicaragua   | Diet low in milk            | 13<br>(5 to 18)              | 0.93<br>(0.35 to 1.3)        | 60<br>(22 to 84)             | 1.52<br>(0.55 to 2.11)       | 1.8<br>(1.57 to 2.04)     |
| Nicaragua   | Diet low in fiber           | 2<br>(1 to 4)                | 0.14<br>(0.05 to 0.29)       | 6<br>(2 to 13)               | 0.15<br>(0.05 to 0.35)       | -0.41<br>(-0.82 to 0)     |
| Nicaragua   | Diet low in calcium         | 21<br>(16 to 27)             | 1.46<br>(1.1 to 1.92)        | 83<br>(61 to 109)            | 2.13<br>(1.59 to 2.78)       | 1.28<br>(1.03 to 1.52)    |
| Nicaragua   | Diet high in red meat       | 2<br>(0 to 4)                | 0.11<br>(0.01 to 0.29)       | 7<br>(1 to 17)               | 0.17<br>(0.02 to 0.43)       | 1.8<br>(1.63 to 1.97)     |
| Nicaragua   | Diet high in processed meat | 1<br>(0 to 2)                | 0.07<br>(0.01 to 0.13)       | 5<br>(1 to 10)               | 0.13<br>(0.02 to 0.25)       | 2.61<br>(2.35 to 2.87)    |
| Nicaragua   | Diet low in whole grains    | 13<br>(5 to 18)              | 0.93<br>(0.35 to 1.3)        | 60<br>(22 to 84)             | 1.52<br>(0.55 to 2.11)       | 1.8<br>(1.57 to 2.04)     |
| Niger       | All dietary risks           | 52<br>(38 to 71)             | 2.16<br>(1.58 to 2.9)        | 131<br>(91 to 181)           | 2.01<br>(1.42 to 2.75)       | -0.26<br>(-0.39 to -0.14) |
| Niger       | Diet low in milk            | 21<br>(8 to 31)              | 0.87<br>(0.33 to 1.27)       | 58<br>(21 to 87)             | 0.88<br>(0.34 to 1.31)       | 0.1<br>(0 to 0.19)        |
| Niger       | Diet low in fiber           | 2<br>(1 to 4)                | 0.07<br>(0.02 to 0.17)       | 2<br>(1 to 5)                | 0.03<br>(0.01 to 0.08)       | -3.47<br>(-3.89 to -3.05) |
| Niger       | Diet low in calcium         | 31<br>(22 to 42)             | 1.27<br>(0.92 to 1.73)       | 69<br>(46 to 100)            | 1.08<br>(0.74 to 1.55)       | -0.68<br>(-0.85 to -0.51) |
| Niger       | Diet high in red meat       | 4<br>(0 to 11)               | 0.15<br>(0.01 to 0.43)       | 11<br>(1 to 30)              | 0.16<br>(0.01 to 0.44)       | 0.26<br>(0.19 to 0.33)    |
| Niger       | Diet high in processed meat | 3<br>(0 to 6)                | 0.12<br>(0.01 to 0.24)       | 10<br>(1 to 19)              | 0.14<br>(0.02 to 0.27)       | 0.58<br>(0.49 to 0.67)    |
| Niger       | Diet low in whole grains    | 21<br>(8 to 31)              | 0.87<br>(0.33 to 1.27)       | 58<br>(21 to 87)             | 0.88<br>(0.34 to 1.31)       | 0.1<br>(0 to 0.19)        |
| Nigeria     | All dietary risks           | 1006<br>(710 to 1394)        | 2.6<br>(1.86 to 3.53)        | 2425<br>(1751 to 3204)       | 3.3<br>(2.44 to 4.31)        | 1.19<br>(1.02 to 1.37)    |
| Nigeria     | Diet low in milk            | 394<br>(153 to 600)          | 1.02<br>(0.39 to 1.54)       | 982<br>(380 to 1428)         | 1.33<br>(0.51 to 1.92)       | 1.34<br>(1.16 to 1.52)    |
| Nigeria     | Diet low in fiber           | 17<br>(7 to 41)              | 0.05<br>(0.02 to 0.11)       | 21<br>(13 to 39)             | 0.03<br>(0.02 to 0.05)       | -1.51<br>(-1.87 to -1.15) |

| Countries       | Risk factors                | 1990                         |                              | 2019                         |                              | 1990-2019                 |
|-----------------|-----------------------------|------------------------------|------------------------------|------------------------------|------------------------------|---------------------------|
|                 |                             | Number of deaths<br>(95% UI) | ASDR per 100,000<br>(95% UI) | Number of deaths<br>(95% UI) | ASDR per 100,000<br>(95% UI) | EAPC of ASDR<br>(95% CI)  |
| Nigeria         | Diet low in calcium         | 647<br>(450 to 912)          | 1.68<br>(1.18 to 2.33)       | 1477<br>(1064 to 2007)       | 2.03<br>(1.48 to 2.71)       | 0.98<br>(0.82 to 1.14)    |
| Nigeria         | Diet high in red meat       | 38<br>(5 to 104)             | 0.09<br>(0.01 to 0.26)       | 110<br>(13 to 295)           | 0.14<br>(0.02 to 0.38)       | 2<br>(1.77 to 2.22)       |
| Nigeria         | Diet high in processed meat | 57<br>(8 to 114)             | 0.14<br>(0.02 to 0.28)       | 174<br>(27 to 322)           | 0.22<br>(0.03 to 0.41)       | 2.05<br>(1.86 to 2.25)    |
| Nigeria         | Diet low in whole grains    | 394<br>(153 to 600)          | 1.02<br>(0.39 to 1.54)       | 982<br>(380 to 1428)         | 1.33<br>(0.51 to 1.92)       | 1.34<br>(1.16 to 1.52)    |
| Niue            | All dietary risks           | 0<br>(0 to 0)                | 4.83<br>(3.67 to 6.21)       | 0<br>(0 to 0)                | 4.93<br>(3.48 to 6.55)       | 0.02<br>(-0.01 to 0.05)   |
| Niue            | Diet low in milk            | 0<br>(0 to 0)                | 2.11<br>(0.78 to 2.94)       | 0<br>(0 to 0)                | 2.22<br>(0.78 to 3.16)       | 0.14<br>(0.11 to 0.18)    |
| Niue            | Diet low in fiber           | 0<br>(0 to 0)                | 0.04<br>(0.02 to 0.06)       | 0<br>(0 to 0)                | 0.03<br>(0.02 to 0.05)       | -0.5<br>(-0.56 to -0.45)  |
| Niue            | Diet low in calcium         | 0<br>(0 to 0)                | 2.86<br>(2.21 to 3.73)       | 0<br>(0 to 0)                | 2.8<br>(1.99 to 3.85)        | -0.15<br>(-0.19 to -0.12) |
| Niue            | Diet high in red meat       | 0<br>(0 to 0)                | 0.38<br>(0.04 to 1)          | 0<br>(0 to 0)                | 0.41<br>(0.04 to 1.09)       | 0.28<br>(0.23 to 0.34)    |
| Niue            | Diet high in processed meat | 0<br>(0 to 0)                | 0.11<br>(0.03 to 0.19)       | 0<br>(0 to 0)                | 0.12<br>(0.03 to 0.24)       | 0.52<br>(0.46 to 0.57)    |
| Niue            | Diet low in whole grains    | 0<br>(0 to 0)                | 2.11<br>(0.78 to 2.94)       | 0<br>(0 to 0)                | 2.22<br>(0.78 to 3.16)       | 0.14<br>(0.11 to 0.18)    |
| North Macedonia | All dietary risks           | 90<br>(63 to 109)            | 5.02<br>(3.54 to 6.14)       | 208<br>(133 to 286)          | 6.77<br>(4.33 to 9.21)       | 1.06<br>(0.79 to 1.34)    |
| North Macedonia | Diet low in milk            | 49<br>(20 to 64)             | 2.76<br>(1.11 to 3.56)       | 124<br>(49 to 177)           | 4.03<br>(1.57 to 5.72)       | 1.45<br>(1.18 to 1.71)    |
| North Macedonia | Diet low in fiber           | 3<br>(1 to 8)                | 0.19<br>(0.06 to 0.46)       | 7<br>(2 to 18)               | 0.24<br>(0.08 to 0.59)       | 0.68<br>(0.24 to 1.13)    |
| North Macedonia | Diet low in calcium         | 31<br>(19 to 48)             | 1.79<br>(1.1 to 2.69)        | 54<br>(27 to 94)             | 1.8<br>(0.92 to 3.06)        | -0.29<br>(-0.65 to 0.07)  |
| North Macedonia | Diet high in red meat       | 7<br>(1 to 20)               | 0.4<br>(0.03 to 1.08)        | 18<br>(2 to 53)              | 0.59<br>(0.05 to 1.69)       | 1.6<br>(1.37 to 1.84)     |
| North Macedonia | Diet high in processed meat | 10<br>(2 to 17)              | 0.56<br>(0.1 to 0.93)        | 28<br>(6 to 50)              | 0.9<br>(0.18 to 1.58)        | 1.93<br>(1.68 to 2.18)    |
| North Macedonia | Diet low in whole grains    | 49<br>(20 to 64)             | 2.76<br>(1.11 to 3.56)       | 124<br>(49 to 177)           | 4.03<br>(1.57 to 5.72)       | 1.45<br>(1.18 to 1.71)    |

| Countries                | Risk factors                | 1990                         |                              | 2019                         |                              | 1990-2019                 |
|--------------------------|-----------------------------|------------------------------|------------------------------|------------------------------|------------------------------|---------------------------|
|                          |                             | Number of deaths<br>(95% UI) | ASDR per 100,000<br>(95% UI) | Number of deaths<br>(95% UI) | ASDR per 100,000<br>(95% UI) | EAPC of ASDR<br>(95% CI)  |
| Northern Mariana Islands | All dietary risks           | 1<br>(1 to 1)                | 6.42<br>(4.43 to 8.28)       | 3<br>(2 to 3)                | 6.2<br>(4.54 to 7.77)        | -0.05<br>(-0.19 to 0.09)  |
| Northern Mariana Islands | Diet low in milk            | 0<br>(0 to 1)                | 3.15<br>(1.2 to 4.43)        | 1<br>(0 to 2)                | 2.98<br>(1.12 to 4.02)       | -0.15<br>(-0.29 to -0.02) |
| Northern Mariana Islands | Diet low in fiber           | 0<br>(0 to 0)                | 0.04<br>(0.03 to 0.05)       | 0<br>(0 to 0)                | 0.04<br>(0.03 to 0.05)       | -0.15<br>(-0.28 to -0.03) |
| Northern Mariana Islands | Diet low in calcium         | 0<br>(0 to 1)                | 3.07<br>(2.02 to 4.24)       | 1<br>(1 to 2)                | 3.15<br>(2.27 to 4.24)       | 0.23<br>(0.06 to 0.39)    |
| Northern Mariana Islands | Diet high in red meat       | 0<br>(0 to 0)                | 0.75<br>(0.1 to 1.77)        | 0<br>(0 to 1)                | 0.63<br>(0.07 to 1.58)       | -0.65<br>(-0.79 to -0.51) |
| Northern Mariana Islands | Diet high in processed meat | 0<br>(0 to 0)                | 0.19<br>(0.04 to 0.36)       | 0<br>(0 to 0)                | 0.18<br>(0.04 to 0.32)       | -0.29<br>(-0.42 to -0.16) |
| Northern Mariana Islands | Diet low in whole grains    | 0<br>(0 to 1)                | 3.15<br>(1.2 to 4.43)        | 1<br>(0 to 2)                | 2.98<br>(1.12 to 4.02)       | -0.15<br>(-0.29 to -0.02) |
| Norway                   | All dietary risks           | 536<br>(386 to 660)          | 7.55<br>(5.47 to 9.3)        | 678<br>(492 to 839)          | 6.61<br>(4.81 to 8.17)       | -0.43<br>(-0.55 to -0.3)  |
| Norway                   | Diet low in milk            | 291<br>(119 to 371)          | 4.1<br>(1.67 to 5.21)        | 356<br>(140 to 458)          | 3.46<br>(1.35 to 4.45)       | -0.62<br>(-0.73 to -0.51) |
| Norway                   | Diet low in fiber           | 48<br>(18 to 89)             | 0.66<br>(0.25 to 1.25)       | 46<br>(18 to 90)             | 0.43<br>(0.16 to 0.85)       | -1.6<br>(-1.78 to -1.41)  |
| Norway                   | Diet low in calcium         | 74<br>(35 to 127)            | 1.01<br>(0.48 to 1.71)       | 96<br>(50 to 161)            | 0.91<br>(0.47 to 1.53)       | 0.16<br>(-0.04 to 0.36)   |
| Norway                   | Diet high in red meat       | 79<br>(16 to 166)            | 1.14<br>(0.24 to 2.38)       | 122<br>(32 to 232)           | 1.22<br>(0.33 to 2.3)        | 0.25<br>(0.04 to 0.45)    |
| Norway                   | Diet high in processed meat | 121<br>(46 to 205)           | 1.72<br>(0.65 to 2.94)       | 157<br>(60 to 265)           | 1.55<br>(0.59 to 2.66)       | -0.35<br>(-0.51 to -0.19) |
| Norway                   | Diet low in whole grains    | 291<br>(119 to 371)          | 4.1<br>(1.67 to 5.21)        | 356<br>(140 to 458)          | 3.46<br>(1.35 to 4.45)       | -0.62<br>(-0.73 to -0.51) |
| Oman                     | All dietary risks           | 15<br>(9 to 22)              | 2.67<br>(1.68 to 3.76)       | 37<br>(23 to 51)             | 2.9<br>(1.9 to 3.86)         | 0.64<br>(0.51 to 0.77)    |
| Oman                     | Diet low in milk            | 8<br>(3 to 12)               | 1.35<br>(0.53 to 1.97)       | 22<br>(8 to 31)              | 1.69<br>(0.61 to 2.34)       | 1.2<br>(1.01 to 1.39)     |
| Oman                     | Diet low in fiber           | 1<br>(0 to 2)                | 0.13<br>(0.04 to 0.32)       | 1<br>(0 to 2)                | 0.08<br>(0.03 to 0.19)       | -1.9<br>(-2.45 to -1.33)  |
| Oman                     | Diet low in calcium         | 7<br>(4 to 11)               | 1.26<br>(0.76 to 1.88)       | 12<br>(6 to 21)              | 1.02<br>(0.58 to 1.66)       | -0.67<br>(-0.83 to -0.51) |



| Countries | Risk factors                | 1990                         |                              | 2019                         |                              | 1990-2019                 |
|-----------|-----------------------------|------------------------------|------------------------------|------------------------------|------------------------------|---------------------------|
|           |                             | Number of deaths<br>(95% UI) | ASDR per 100,000<br>(95% UI) | Number of deaths<br>(95% UI) | ASDR per 100,000<br>(95% UI) | EAPC of ASDR<br>(95% CI)  |
| Oman      | Diet high in red meat       | 1<br>(0 to 4)                | 0.22<br>(0.02 to 0.62)       | 5<br>(0 to 12)               | 0.32<br>(0.03 to 0.87)       | 2.06<br>(1.74 to 2.38)    |
| Oman      | Diet high in processed meat | 0<br>(0 to 1)                | 0.06<br>(0.02 to 0.12)       | 1<br>(0 to 2)                | 0.09<br>(0.02 to 0.17)       | 1.93<br>(1.63 to 2.22)    |
| Oman      | Diet low in whole grains    | 8<br>(3 to 12)               | 1.35<br>(0.53 to 1.97)       | 22<br>(8 to 31)              | 1.69<br>(0.61 to 2.34)       | 1.2<br>(1.01 to 1.39)     |
| Pakistan  | All dietary risks           | 1260<br>(996 to 1523)        | 2.32<br>(1.83 to 2.81)       | 3348<br>(2405 to 4339)       | 3.29<br>(2.35 to 4.23)       | 1.15<br>(0.92 to 1.37)    |
| Pakistan  | Diet low in milk            | 607<br>(288 to 781)          | 1.12<br>(0.53 to 1.45)       | 1780<br>(813 to 2436)        | 1.74<br>(0.79 to 2.36)       | 1.41<br>(1.14 to 1.69)    |
| Pakistan  | Diet low in fiber           | 118<br>(47 to 201)           | 0.22<br>(0.09 to 0.38)       | 292<br>(110 to 545)          | 0.29<br>(0.11 to 0.53)       | 1.13<br>(0.87 to 1.4)     |
| Pakistan  | Diet low in calcium         | 620<br>(487 to 795)          | 1.15<br>(0.9 to 1.46)        | 1372<br>(914 to 1952)        | 1.38<br>(0.94 to 1.95)       | 0.63<br>(0.47 to 0.79)    |
| Pakistan  | Diet high in red meat       | 64<br>(6 to 173)             | 0.12<br>(0.01 to 0.31)       | 198<br>(18 to 551)           | 0.19<br>(0.02 to 0.52)       | 1.53<br>(1.33 to 1.73)    |
| Pakistan  | Diet high in processed meat | 84<br>(13 to 147)            | 0.15<br>(0.02 to 0.26)       | 262<br>(41 to 483)           | 0.24<br>(0.04 to 0.44)       | 1.49<br>(1.24 to 1.75)    |
| Pakistan  | Diet low in whole grains    | 607<br>(288 to 781)          | 1.12<br>(0.53 to 1.45)       | 1780<br>(813 to 2436)        | 1.74<br>(0.79 to 2.36)       | 1.41<br>(1.14 to 1.69)    |
| Palau     | All dietary risks           | 0<br>(0 to 1)                | 5.05<br>(3.65 to 6.69)       | 1<br>(1 to 1)                | 4.85<br>(3.46 to 6.39)       | -0.17<br>(-0.24 to -0.09) |
| Palau     | Diet low in milk            | 0<br>(0 to 0)                | 2.25<br>(0.86 to 3.2)        | 0<br>(0 to 1)                | 2.22<br>(0.8 to 3.12)        | -0.08<br>(-0.15 to -0.01) |
| Palau     | Diet low in fiber           | 0<br>(0 to 0)                | 0.03<br>(0.02 to 0.06)       | 0<br>(0 to 0)                | 0.03<br>(0.02 to 0.04)       | -0.33<br>(-0.41 to -0.24) |
| Palau     | Diet low in calcium         | 0<br>(0 to 0)                | 2.89<br>(2.11 to 3.95)       | 0<br>(0 to 1)                | 2.68<br>(1.93 to 3.67)       | -0.28<br>(-0.36 to -0.2)  |
| Palau     | Diet high in red meat       | 0<br>(0 to 0)                | 0.42<br>(0.04 to 1.1)        | 0<br>(0 to 0)                | 0.42<br>(0.04 to 1.1)        | -0.1<br>(-0.17 to -0.03)  |
| Palau     | Diet high in processed meat | 0<br>(0 to 0)                | 0.12<br>(0.03 to 0.22)       | 0<br>(0 to 0)                | 0.13<br>(0.03 to 0.24)       | 0.24<br>(0.16 to 0.32)    |
| Palau     | Diet low in whole grains    | 0<br>(0 to 0)                | 2.25<br>(0.86 to 3.2)        | 0<br>(0 to 1)                | 2.22<br>(0.8 to 3.12)        | -0.08<br>(-0.15 to -0.01) |
| Palestine | All dietary risks           | 53<br>(36 to 74)             | 6.49<br>(4.41 to 8.99)       | 182<br>(144 to 221)          | 8.56<br>(6.8 to 10.32)       | 1.13<br>(0.9 to 1.37)     |

| Countries        | Risk factors                | 1990                         |                              | 2019                         |                              | 1990-2019                 |
|------------------|-----------------------------|------------------------------|------------------------------|------------------------------|------------------------------|---------------------------|
|                  |                             | Number of deaths<br>(95% UI) | ASDR per 100,000<br>(95% UI) | Number of deaths<br>(95% UI) | ASDR per 100,000<br>(95% UI) | EAPC of ASDR<br>(95% CI)  |
| Palestine        | Diet low in milk            | 25<br>(13 to 37)             | 3.1<br>(1.53 to 4.43)        | 85<br>(41 to 112)            | 4.01<br>(1.95 to 5.21)       | 1.04<br>(0.8 to 1.29)     |
| Palestine        | Diet low in fiber           | 4<br>(2 to 8)                | 0.54<br>(0.2 to 1.02)        | 16<br>(6 to 27)              | 0.75<br>(0.29 to 1.29)       | 1.52<br>(1.31 to 1.72)    |
| Palestine        | Diet low in calcium         | 30<br>(19 to 42)             | 3.61<br>(2.37 to 5.13)       | 102<br>(79 to 129)           | 4.82<br>(3.76 to 6.11)       | 1.2<br>(0.97 to 1.42)     |
| Palestine        | Diet high in red meat       | 2<br>(0 to 6)                | 0.27<br>(0.03 to 0.77)       | 7<br>(1 to 19)               | 0.33<br>(0.04 to 0.85)       | 0.54<br>(0.27 to 0.81)    |
| Palestine        | Diet high in processed meat | 1<br>(0 to 2)                | 0.11<br>(0.04 to 0.2)        | 3<br>(1 to 6)                | 0.15<br>(0.05 to 0.25)       | 1.07<br>(0.81 to 1.33)    |
| Palestine        | Diet low in whole grains    | 25<br>(13 to 37)             | 3.1<br>(1.53 to 4.43)        | 85<br>(41 to 112)            | 4.01<br>(1.95 to 5.21)       | 1.04<br>(0.8 to 1.29)     |
| Panama           | All dietary risks           | 50<br>(41 to 59)             | 3.46<br>(2.81 to 4.07)       | 153<br>(106 to 206)          | 3.66<br>(2.54 to 4.94)       | 0.34<br>(0.25 to 0.43)    |
| Panama           | Diet low in milk            | 18<br>(7 to 25)              | 1.26<br>(0.47 to 1.71)       | 60<br>(22 to 89)             | 1.43<br>(0.53 to 2.13)       | 0.6<br>(0.52 to 0.67)     |
| Panama           | Diet low in fiber           | 7<br>(3 to 10)               | 0.46<br>(0.19 to 0.71)       | 20<br>(8 to 36)              | 0.49<br>(0.19 to 0.86)       | 0.38<br>(0.14 to 0.62)    |
| Panama           | Diet low in calcium         | 28<br>(22 to 35)             | 1.93<br>(1.54 to 2.39)       | 74<br>(48 to 105)            | 1.76<br>(1.14 to 2.51)       | -0.24<br>(-0.36 to -0.13) |
| Panama           | Diet high in red meat       | 4<br>(0 to 11)               | 0.29<br>(0.03 to 0.74)       | 16<br>(2 to 41)              | 0.38<br>(0.04 to 0.98)       | 1.19<br>(1.04 to 1.34)    |
| Panama           | Diet high in processed meat | 1<br>(0 to 3)                | 0.1<br>(0.02 to 0.17)        | 6<br>(1 to 11)               | 0.13<br>(0.02 to 0.26)       | 1.37<br>(1.27 to 1.47)    |
| Panama           | Diet low in whole grains    | 18<br>(7 to 25)              | 1.26<br>(0.47 to 1.71)       | 60<br>(22 to 89)             | 1.43<br>(0.53 to 2.13)       | 0.6<br>(0.52 to 0.67)     |
| Papua New Guinea | All dietary risks           | 42<br>(27 to 58)             | 2.52<br>(1.63 to 3.49)       | 127<br>(87 to 176)           | 3.01<br>(2.12 to 4.09)       | 0.56<br>(0.53 to 0.59)    |
| Papua New Guinea | Diet low in milk            | 18<br>(7 to 27)              | 1.08<br>(0.42 to 1.59)       | 54<br>(20 to 78)             | 1.27<br>(0.49 to 1.86)       | 0.51<br>(0.47 to 0.55)    |
| Papua New Guinea | Diet low in fiber           | 0<br>(0 to 1)                | 0.02<br>(0.01 to 0.04)       | 1<br>(1 to 1)                | 0.02<br>(0.01 to 0.04)       | 0.33<br>(0.25 to 0.42)    |
| Papua New Guinea | Diet low in calcium         | 26<br>(16 to 36)             | 1.57<br>(1.01 to 2.2)        | 80<br>(55 to 111)            | 1.9<br>(1.32 to 2.6)         | 0.63<br>(0.6 to 0.66)     |
| Papua New Guinea | Diet high in red meat       | 3<br>(0 to 8)                | 0.16<br>(0.01 to 0.47)       | 8<br>(1 to 23)               | 0.18<br>(0.02 to 0.51)       | 0.22<br>(0.13 to 0.32)    |

| Countries        | Risk factors                | 1990                         |                              | 2019                         |                              | 1990-2019                 |
|------------------|-----------------------------|------------------------------|------------------------------|------------------------------|------------------------------|---------------------------|
|                  |                             | Number of deaths<br>(95% UI) | ASDR per 100,000<br>(95% UI) | Number of deaths<br>(95% UI) | ASDR per 100,000<br>(95% UI) | EAPC of ASDR<br>(95% CI)  |
| Papua New Guinea | Diet high in processed meat | 1<br>(0 to 2)                | 0.05<br>(0.02 to 0.09)       | 3<br>(1 to 5)                | 0.06<br>(0.02 to 0.1)        | 0.58<br>(0.52 to 0.65)    |
| Papua New Guinea | Diet low in whole grains    | 18<br>(7 to 27)              | 1.08<br>(0.42 to 1.59)       | 54<br>(20 to 78)             | 1.27<br>(0.49 to 1.86)       | 0.51<br>(0.47 to 0.55)    |
| Paraguay         | All dietary risks           | 50<br>(40 to 61)             | 2.38<br>(1.87 to 2.9)        | 218<br>(144 to 297)          | 4.08<br>(2.7 to 5.52)        | 2.15<br>(1.98 to 2.32)    |
| Paraguay         | Diet low in milk            | 20<br>(7 to 27)              | 0.95<br>(0.36 to 1.28)       | 95<br>(35 to 137)            | 1.77<br>(0.66 to 2.56)       | 2.54<br>(2.35 to 2.73)    |
| Paraguay         | Diet low in fiber           | 1<br>(0 to 2)                | 0.04<br>(0.02 to 0.1)        | 4<br>(2 to 8)                | 0.07<br>(0.03 to 0.16)       | 1.76<br>(1.47 to 2.05)    |
| Paraguay         | Diet low in calcium         | 23<br>(17 to 31)             | 1.12<br>(0.82 to 1.46)       | 94<br>(59 to 140)            | 1.78<br>(1.11 to 2.62)       | 2.01<br>(1.82 to 2.2)     |
| Paraguay         | Diet high in red meat       | 12<br>(4 to 20)              | 0.57<br>(0.19 to 0.95)       | 48<br>(13 to 91)             | 0.88<br>(0.23 to 1.68)       | 1.25<br>(1.07 to 1.44)    |
| Paraguay         | Diet high in processed meat | 2<br>(0 to 3)                | 0.08<br>(0.01 to 0.14)       | 8<br>(1 to 17)               | 0.15<br>(0.03 to 0.31)       | 2.76<br>(2.57 to 2.96)    |
| Paraguay         | Diet low in whole grains    | 20<br>(7 to 27)              | 0.95<br>(0.36 to 1.28)       | 95<br>(35 to 137)            | 1.77<br>(0.66 to 2.56)       | 2.54<br>(2.35 to 2.73)    |
| Peru             | All dietary risks           | 324<br>(250 to 398)          | 2.87<br>(2.22 to 3.54)       | 923<br>(615 to 1273)         | 2.87<br>(1.91 to 3.97)       | 0.03<br>(-0.19 to 0.25)   |
| Peru             | Diet low in milk            | 137<br>(52 to 187)           | 1.21<br>(0.47 to 1.65)       | 444<br>(164 to 659)          | 1.38<br>(0.51 to 2.06)       | 0.59<br>(0.37 to 0.82)    |
| Peru             | Diet low in fiber           | 28<br>(10 to 54)             | 0.25<br>(0.09 to 0.49)       | 31<br>(11 to 77)             | 0.1<br>(0.04 to 0.24)        | -3.85<br>(-4.12 to -3.59) |
| Peru             | Diet low in calcium         | 183<br>(137 to 235)          | 1.62<br>(1.22 to 2.09)       | 466<br>(291 to 682)          | 1.45<br>(0.91 to 2.13)       | -0.47<br>(-0.72 to -0.22) |
| Peru             | Diet high in red meat       | 17<br>(2 to 45)              | 0.15<br>(0.02 to 0.39)       | 63<br>(6 to 175)             | 0.19<br>(0.02 to 0.55)       | 1.23<br>(1.03 to 1.43)    |
| Peru             | Diet high in processed meat | 5<br>(3 to 7)                | 0.04<br>(0.03 to 0.06)       | 20<br>(8 to 36)              | 0.06<br>(0.03 to 0.11)       | 1.88<br>(1.72 to 2.05)    |
| Peru             | Diet low in whole grains    | 137<br>(52 to 187)           | 1.21<br>(0.47 to 1.65)       | 444<br>(164 to 659)          | 1.38<br>(0.51 to 2.06)       | 0.59<br>(0.37 to 0.82)    |
| Philippines      | All dietary risks           | 1599<br>(1296 to 1894)       | 5.65<br>(4.59 to 6.7)        | 4672<br>(3592 to 5908)       | 6.24<br>(4.84 to 7.83)       | 0.19<br>(-0.07 to 0.45)   |

| Countries   | Risk factors                   | 1990                            |                                 | 2019                            |                                 | 1990-2019                 |
|-------------|--------------------------------|---------------------------------|---------------------------------|---------------------------------|---------------------------------|---------------------------|
|             |                                | Number of<br>deaths<br>(95% UI) | ASDR per<br>100,000<br>(95% UI) | Number of<br>deaths<br>(95% UI) | ASDR per<br>100,000<br>(95% UI) | EAPC of ASDR<br>(95% CI)  |
| Philippines | Diet low in milk               | 515<br>(194 to 728)             | 1.81<br>(0.69 to 2.57)          | 1440<br>(552 to 2138)           | 1.92<br>(0.74 to 2.84)          | 0<br>(-0.28 to 0.27)      |
| Philippines | Diet low in fiber              | 225<br>(104 to 336)             | 0.8<br>(0.37 to 1.2)            | 633<br>(287 to 992)             | 0.85<br>(0.39 to 1.33)          | 0.05<br>(-0.13 to 0.24)   |
| Philippines | Diet low in<br>calcium         | 1010<br>(763 to 1254)           | 3.59<br>(2.72 to 4.44)          | 2905<br>(2180 to 3856)          | 3.89<br>(2.95 to 5.1)           | 0.14<br>(-0.13 to 0.42)   |
| Philippines | Diet high in red<br>meat       | 85<br>(8 to 226)                | 0.29<br>(0.03 to 0.77)          | 330<br>(34 to 860)              | 0.43<br>(0.04 to 1.12)          | 1.12<br>(0.91 to 1.33)    |
| Philippines | Diet high in<br>processed meat | 42<br>(9 to 75)                 | 0.14<br>(0.03 to 0.25)          | 171<br>(26 to 319)              | 0.22<br>(0.03 to 0.4)           | 1.53<br>(1.18 to 1.88)    |
| Philippines | Diet low in<br>whole grains    | 515<br>(194 to 728)             | 1.81<br>(0.69 to 2.57)          | 1440<br>(552 to 2138)           | 1.92<br>(0.74 to 2.84)          | 0<br>(-0.28 to 0.27)      |
| Poland      | All dietary risks              | 2867<br>(2010 to 3549)          | 6.7<br>(4.7 to 8.27)            | 5348<br>(3597 to 6924)          | 7.46<br>(5.01 to 9.7)           | 0.26<br>(0.1 to 0.41)     |
| Poland      | Diet low in milk               | 1724<br>(718 to 2187)           | 4.02<br>(1.68 to 5.1)           | 2914<br>(1101 to 3990)          | 4.05<br>(1.53 to 5.53)          | -0.19<br>(-0.31 to -0.07) |
| Poland      | Diet low in fiber              | 74<br>(31 to 169)               | 0.18<br>(0.07 to 0.41)          | 141<br>(58 to 319)              | 0.2<br>(0.08 to 0.44)           | 0.35<br>(-0.01 to 0.71)   |
| Poland      | Diet low in<br>calcium         | 612<br>(309 to 1064)            | 1.44<br>(0.72 to 2.5)           | 1181<br>(563 to 2126)           | 1.63<br>(0.77 to 2.92)          | 0.33<br>(-0.08 to 0.74)   |
| Poland      | Diet high in red<br>meat       | 581<br>(153 to 1087)            | 1.35<br>(0.35 to 2.53)          | 1216<br>(364 to 2265)           | 1.72<br>(0.52 to 3.18)          | 0.9<br>(0.82 to 0.99)     |
| Poland      | Diet high in<br>processed meat | 217<br>(28 to 372)              | 0.51<br>(0.07 to 0.87)          | 546<br>(84 to 950)              | 0.77<br>(0.12 to 1.34)          | 1.67<br>(1.36 to 1.97)    |
| Poland      | Diet low in<br>whole grains    | 1724<br>(718 to 2187)           | 4.02<br>(1.68 to 5.1)           | 2914<br>(1101 to 3990)          | 4.05<br>(1.53 to 5.53)          | -0.19<br>(-0.31 to -0.07) |
| Portugal    | All dietary risks              | 919<br>(637 to 1144)            | 6.89<br>(4.82 to 8.56)          | 1692<br>(1188 to 2095)          | 6.59<br>(4.69 to 8.13)          | -0.14<br>(-0.35 to 0.07)  |
| Portugal    | Diet low in milk               | 486<br>(180 to 633)             | 3.63<br>(1.35 to 4.73)          | 865<br>(324 to 1125)            | 3.35<br>(1.25 to 4.36)          | -0.36<br>(-0.53 to -0.19) |
| Portugal    | Diet low in fiber              | 39<br>(13 to 95)                | 0.3<br>(0.1 to 0.74)            | 82<br>(27 to 189)               | 0.3<br>(0.1 to 0.71)            | 0.45<br>(0.2 to 0.69)     |
| Portugal    | Diet low in<br>calcium         | 293<br>(166 to 473)             | 2.18<br>(1.23 to 3.52)          | 377<br>(193 to 663)             | 1.4<br>(0.72 to 2.47)           | -1.38<br>(-1.48 to -1.28) |

| Countries         | Risk factors                | 1990                         |                              | 2019                         |                              | 1990-2019                 |
|-------------------|-----------------------------|------------------------------|------------------------------|------------------------------|------------------------------|---------------------------|
|                   |                             | Number of deaths<br>(95% UI) | ASDR per 100,000<br>(95% UI) | Number of deaths<br>(95% UI) | ASDR per 100,000<br>(95% UI) | EAPC of ASDR<br>(95% CI)  |
| Portugal          | Diet high in red meat       | 136<br>(21 to 302)           | 1.03<br>(0.17 to 2.27)       | 441<br>(148 to 745)          | 1.81<br>(0.64 to 3)          | 1.81<br>(1.15 to 2.47)    |
| Portugal          | Diet high in processed meat | 82<br>(9 to 140)             | 0.62<br>(0.07 to 1.06)       | 164<br>(21 to 280)           | 0.66<br>(0.09 to 1.12)       | 0.24<br>(-0.06 to 0.54)   |
| Portugal          | Diet low in whole grains    | 486<br>(180 to 633)          | 3.63<br>(1.35 to 4.73)       | 865<br>(324 to 1125)         | 3.35<br>(1.25 to 4.36)       | -0.36<br>(-0.53 to -0.19) |
| Puerto Rico       | All dietary risks           | 156<br>(111 to 190)          | 4.38<br>(3.14 to 5.32)       | 341<br>(216 to 463)          | 4.61<br>(2.93 to 6.3)        | 0.06<br>(-0.13 to 0.26)   |
| Puerto Rico       | Diet low in milk            | 81<br>(30 to 103)            | 2.27<br>(0.85 to 2.91)       | 187<br>(68 to 266)           | 2.54<br>(0.93 to 3.64)       | 0.29<br>(0.07 to 0.51)    |
| Puerto Rico       | Diet low in fiber           | 11<br>(4 to 22)              | 0.31<br>(0.11 to 0.62)       | 20<br>(7 to 43)              | 0.26<br>(0.09 to 0.58)       | -0.72<br>(-0.84 to -0.61) |
| Puerto Rico       | Diet low in calcium         | 65<br>(43 to 94)             | 1.84<br>(1.21 to 2.65)       | 129<br>(75 to 203)           | 1.72<br>(0.99 to 2.73)       | -0.38<br>(-0.53 to -0.23) |
| Puerto Rico       | Diet high in red meat       | 12<br>(1 to 33)              | 0.35<br>(0.03 to 0.92)       | 30<br>(3 to 84)              | 0.41<br>(0.04 to 1.15)       | 0.5<br>(0.26 to 0.75)     |
| Puerto Rico       | Diet high in processed meat | 6<br>(1 to 10)               | 0.16<br>(0.03 to 0.29)       | 14<br>(2 to 28)              | 0.2<br>(0.03 to 0.39)        | 0.62<br>(0.38 to 0.85)    |
| Puerto Rico       | Diet low in whole grains    | 81<br>(30 to 103)            | 2.27<br>(0.85 to 2.91)       | 187<br>(68 to 266)           | 2.54<br>(0.93 to 3.64)       | 0.29<br>(0.07 to 0.51)    |
| Qatar             | All dietary risks           | 3<br>(2 to 4)                | 3.95<br>(2.48 to 5.55)       | 22<br>(12 to 31)             | 4.38<br>(2.55 to 5.99)       | 0.81<br>(0.54 to 1.08)    |
| Qatar             | Diet low in milk            | 2<br>(1 to 3)                | 2.6<br>(1.08 to 3.65)        | 15<br>(5 to 21)              | 2.96<br>(1.15 to 4.11)       | 1.01<br>(0.72 to 1.3)     |
| Qatar             | Diet low in fiber           | 0<br>(0 to 0)                | 0.04<br>(0.03 to 0.08)       | 0<br>(0 to 0)                | 0.04<br>(0.03 to 0.07)       | 0.08<br>(-0.15 to 0.32)   |
| Qatar             | Diet low in calcium         | 1<br>(0 to 1)                | 1.11<br>(0.54 to 1.99)       | 5<br>(2 to 8)                | 1.08<br>(0.54 to 1.93)       | -0.1<br>(-0.32 to 0.12)   |
| Qatar             | Diet high in red meat       | 0<br>(0 to 1)                | 0.4<br>(0.04 to 1.11)        | 3<br>(0 to 7)                | 0.47<br>(0.04 to 1.28)       | 1.29<br>(0.96 to 1.63)    |
| Qatar             | Diet high in processed meat | 0<br>(0 to 0)                | 0.15<br>(0.03 to 0.3)        | 1<br>(0 to 2)                | 0.19<br>(0.04 to 0.36)       | 1.43<br>(1.08 to 1.77)    |
| Qatar             | Diet low in whole grains    | 2<br>(1 to 3)                | 2.6<br>(1.08 to 3.65)        | 15<br>(5 to 21)              | 2.96<br>(1.15 to 4.11)       | 1.01<br>(0.72 to 1.3)     |
| Republic of Korea | All dietary risks           | 1025<br>(775 to 1255)        | 3.88<br>(2.97 to 4.71)       | 4078<br>(3036 to 5052)       | 4.74<br>(3.52 to 5.88)       | 0.35<br>(0.07 to 0.64)    |

| Countries           | Risk factors                | 1990                         |                              | 2019                         |                              | 1990-2019                 |
|---------------------|-----------------------------|------------------------------|------------------------------|------------------------------|------------------------------|---------------------------|
|                     |                             | Number of deaths<br>(95% UI) | ASDR per 100,000<br>(95% UI) | Number of deaths<br>(95% UI) | ASDR per 100,000<br>(95% UI) | EAPC of ASDR<br>(95% CI)  |
| Republic of Korea   | Diet low in milk            | 373<br>(145 to 534)          | 1.4<br>(0.55 to 2)           | 1591<br>(614 to 2228)        | 1.85<br>(0.71 to 2.58)       | 0.57<br>(0.29 to 0.86)    |
| Republic of Korea   | Diet low in fiber           | 100<br>(37 to 187)           | 0.41<br>(0.16 to 0.74)       | 586<br>(249 to 951)          | 0.69<br>(0.3 to 1.12)        | 1.57<br>(1.21 to 1.93)    |
| Republic of Korea   | Diet low in calcium         | 527<br>(386 to 697)          | 2.02<br>(1.49 to 2.66)       | 1688<br>(1116 to 2422)       | 1.97<br>(1.3 to 2.8)         | -0.44<br>(-0.68 to -0.2)  |
| Republic of Korea   | Diet high in red meat       | 86<br>(7 to 235)             | 0.31<br>(0.03 to 0.85)       | 503<br>(83 to 1112)          | 0.58<br>(0.1 to 1.27)        | 1.82<br>(1.29 to 2.36)    |
| Republic of Korea   | Diet high in processed meat | 76<br>(9 to 133)             | 0.26<br>(0.03 to 0.46)       | 336<br>(43 to 580)           | 0.38<br>(0.05 to 0.66)       | 1.1<br>(0.57 to 1.63)     |
| Republic of Korea   | Diet low in whole grains    | 373<br>(145 to 534)          | 1.4<br>(0.55 to 2)           | 1591<br>(614 to 2228)        | 1.85<br>(0.71 to 2.58)       | 0.57<br>(0.29 to 0.86)    |
| Republic of Moldova | All dietary risks           | 248<br>(173 to 307)          | 5.63<br>(3.92 to 6.99)       | 313<br>(218 to 405)          | 5.37<br>(3.75 to 6.93)       | 0.52<br>(0.04 to 1.01)    |
| Republic of Moldova | Diet low in milk            | 131<br>(49 to 169)           | 2.96<br>(1.11 to 3.83)       | 163<br>(61 to 218)           | 2.79<br>(1.04 to 3.75)       | 0.55<br>(0.01 to 1.1)     |
| Republic of Moldova | Diet low in fiber           | 4<br>(2 to 11)               | 0.11<br>(0.05 to 0.26)       | 10<br>(3 to 25)              | 0.17<br>(0.06 to 0.42)       | 2.2<br>(1.68 to 2.72)     |
| Republic of Moldova | Diet low in calcium         | 76<br>(41 to 124)            | 1.75<br>(0.96 to 2.84)       | 100<br>(55 to 161)           | 1.71<br>(0.94 to 2.76)       | 0.36<br>(-0.01 to 0.73)   |
| Republic of Moldova | Diet high in red meat       | 23<br>(2 to 62)              | 0.51<br>(0.04 to 1.39)       | 26<br>(2 to 72)              | 0.45<br>(0.04 to 1.23)       | 0.43<br>(-0.28 to 1.14)   |
| Republic of Moldova | Diet high in processed meat | 46<br>(13 to 69)             | 1.03<br>(0.3 to 1.56)        | 54<br>(14 to 87)             | 0.92<br>(0.24 to 1.5)        | 0.4<br>(-0.18 to 0.98)    |
| Republic of Moldova | Diet low in whole grains    | 131<br>(49 to 169)           | 2.96<br>(1.11 to 3.83)       | 163<br>(61 to 218)           | 2.79<br>(1.04 to 3.75)       | 0.55<br>(0.01 to 1.1)     |
| Romania             | All dietary risks           | 1023<br>(689 to 1296)        | 3.71<br>(2.5 to 4.7)         | 2107<br>(1366 to 2788)       | 5.64<br>(3.68 to 7.47)       | 1.26<br>(1.05 to 1.48)    |
| Romania             | Diet low in milk            | 597<br>(218 to 770)          | 2.16<br>(0.8 to 2.78)        | 1187<br>(437 to 1649)        | 3.16<br>(1.17 to 4.37)       | 1.04<br>(0.84 to 1.25)    |
| Romania             | Diet low in fiber           | 43<br>(15 to 106)            | 0.16<br>(0.05 to 0.39)       | 49<br>(20 to 117)            | 0.13<br>(0.05 to 0.31)       | -1.5<br>(-1.85 to -1.15)  |
| Romania             | Diet low in calcium         | 246<br>(119 to 435)          | 0.9<br>(0.44 to 1.6)         | 206<br>(94 to 359)           | 0.53<br>(0.24 to 0.92)       | -2.62<br>(-3.01 to -2.23) |
| Romania             | Diet high in red meat       | 135<br>(16 to 331)           | 0.49<br>(0.06 to 1.2)        | 508<br>(123 to 968)          | 1.4<br>(0.35 to 2.62)        | 4.1<br>(3.85 to 4.34)     |

| Countries             | Risk factors                | 1990                         |                              | 2019                         |                              | 1990-2019                 |
|-----------------------|-----------------------------|------------------------------|------------------------------|------------------------------|------------------------------|---------------------------|
|                       |                             | Number of deaths<br>(95% UI) | ASDR per 100,000<br>(95% UI) | Number of deaths<br>(95% UI) | ASDR per 100,000<br>(95% UI) | EAPC of ASDR<br>(95% CI)  |
| Romania               | Diet high in processed meat | 116<br>(16 to 195)           | 0.42<br>(0.06 to 0.71)       | 384<br>(96 to 628)           | 1.04<br>(0.27 to 1.71)       | 3.56<br>(3.31 to 3.81)    |
| Romania               | Diet low in whole grains    | 597<br>(218 to 770)          | 2.16<br>(0.8 to 2.78)        | 1187<br>(437 to 1649)        | 3.16<br>(1.17 to 4.37)       | 1.04<br>(0.84 to 1.25)    |
| Russian Federation    | All dietary risks           | 11290<br>(8473 to 13664)     | 6.34<br>(4.76 to 7.65)       | 13572<br>(9453 to 17522)     | 5.76<br>(4.02 to 7.42)       | -0.87<br>(-1.2 to -0.55)  |
| Russian Federation    | Diet low in milk            | 5313<br>(2093 to 6762)       | 2.99<br>(1.17 to 3.8)        | 7217<br>(2748 to 9557)       | 3.06<br>(1.17 to 4.05)       | -0.23<br>(-0.49 to 0.04)  |
| Russian Federation    | Diet low in fiber           | 455<br>(165 to 1014)         | 0.26<br>(0.1 to 0.58)        | 676<br>(254 to 1462)         | 0.29<br>(0.11 to 0.62)       | -0.7<br>(-1.35 to -0.04)  |
| Russian Federation    | Diet low in calcium         | 2821<br>(1603 to 4530)       | 1.6<br>(0.91 to 2.56)        | 3070<br>(1589 to 5314)       | 1.3<br>(0.67 to 2.25)        | -1.61<br>(-2.08 to -1.14) |
| Russian Federation    | Diet high in red meat       | 2102<br>(615 to 3771)        | 1.17<br>(0.34 to 2.1)        | 1906<br>(341 to 4184)        | 0.81<br>(0.15 to 1.78)       | -2.23<br>(-2.6 to -1.86)  |
| Russian Federation    | Diet high in processed meat | 2628<br>(912 to 4926)        | 1.46<br>(0.51 to 2.73)       | 2529<br>(789 to 3917)        | 1.07<br>(0.33 to 1.66)       | -1.58<br>(-1.95 to -1.21) |
| Russian Federation    | Diet low in whole grains    | 5313<br>(2093 to 6762)       | 2.99<br>(1.17 to 3.8)        | 7217<br>(2748 to 9557)       | 3.06<br>(1.17 to 4.05)       | -0.23<br>(-0.49 to 0.04)  |
| Rwanda                | All dietary risks           | 88<br>(60 to 116)            | 3.25<br>(2.28 to 4.22)       | 166<br>(117 to 219)          | 3.07<br>(2.19 to 3.95)       | -0.63<br>(-0.83 to -0.43) |
| Rwanda                | Diet low in milk            | 39<br>(15 to 57)             | 1.43<br>(0.54 to 2.04)       | 77<br>(28 to 112)            | 1.41<br>(0.53 to 2.02)       | -0.4<br>(-0.61 to -0.19)  |
| Rwanda                | Diet low in fiber           | 1<br>(0 to 1)                | 0.02<br>(0.01 to 0.02)       | 1<br>(1 to 1)                | 0.02<br>(0.02 to 0.02)       | -0.45<br>(-0.64 to -0.26) |
| Rwanda                | Diet low in calcium         | 54<br>(37 to 72)             | 1.99<br>(1.4 to 2.65)        | 93<br>(67 to 127)            | 1.76<br>(1.29 to 2.31)       | -0.97<br>(-1.17 to -0.77) |
| Rwanda                | Diet high in red meat       | 3<br>(0 to 7)                | 0.1<br>(0.02 to 0.25)        | 7<br>(1 to 19)               | 0.13<br>(0.02 to 0.33)       | 0.83<br>(0.57 to 1.09)    |
| Rwanda                | Diet high in processed meat | 4<br>(0 to 7)                | 0.12<br>(0.02 to 0.25)       | 8<br>(1 to 15)               | 0.13<br>(0.02 to 0.25)       | -0.04<br>(-0.29 to 0.22)  |
| Rwanda                | Diet low in whole grains    | 39<br>(15 to 57)             | 1.43<br>(0.54 to 2.04)       | 77<br>(28 to 112)            | 1.41<br>(0.53 to 2.02)       | -0.4<br>(-0.61 to -0.19)  |
| Saint Kitts and Nevis | All dietary risks           | 3<br>(2 to 3)                | 7.5<br>(5.9 to 8.8)          | 4<br>(3 to 5)                | 6.94<br>(5.24 to 8.51)       | -0.08<br>(-0.23 to 0.07)  |
| Saint Kitts and Nevis | Diet low in milk            | 1<br>(0 to 2)                | 3.29<br>(1.29 to 4.26)       | 2<br>(1 to 3)                | 3.17<br>(1.21 to 4.22)       | 0.03<br>(-0.13 to 0.18)   |

| Countries                        | Risk factors                | 1990                         |                              | 2019                         |                              | 1990-2019                 |
|----------------------------------|-----------------------------|------------------------------|------------------------------|------------------------------|------------------------------|---------------------------|
|                                  |                             | Number of deaths<br>(95% UI) | ASDR per 100,000<br>(95% UI) | Number of deaths<br>(95% UI) | ASDR per 100,000<br>(95% UI) | EAPC of ASDR<br>(95% CI)  |
| Saint Kitts and Nevis            | Diet low in fiber           | 0<br>(0 to 1)                | 1.27<br>(0.63 to 1.81)       | 1<br>(0 to 1)                | 1.21<br>(0.62 to 1.78)       | 0.1<br>(-0.03 to 0.24)    |
| Saint Kitts and Nevis            | Diet low in calcium         | 1<br>(1 to 2)                | 3.56<br>(2.76 to 4.56)       | 2<br>(1 to 2)                | 3.03<br>(2.13 to 4.07)       | -0.31<br>(-0.46 to -0.16) |
| Saint Kitts and Nevis            | Diet high in red meat       | 0<br>(0 to 0)                | 0.47<br>(0.04 to 1.29)       | 0<br>(0 to 1)                | 0.48<br>(0.04 to 1.32)       | 0.02<br>(-0.14 to 0.19)   |
| Saint Kitts and Nevis            | Diet high in processed meat | 0<br>(0 to 0)                | 0.21<br>(0.04 to 0.37)       | 0<br>(0 to 0)                | 0.2<br>(0.04 to 0.37)        | -0.03<br>(-0.22 to 0.15)  |
| Saint Kitts and Nevis            | Diet low in whole grains    | 1<br>(0 to 2)                | 3.29<br>(1.29 to 4.26)       | 2<br>(1 to 3)                | 3.17<br>(1.21 to 4.22)       | 0.03<br>(-0.13 to 0.18)   |
| Saint Lucia                      | All dietary risks           | 4<br>(3 to 4)                | 4.53<br>(3.41 to 5.42)       | 9<br>(6 to 11)               | 4.28<br>(3.07 to 5.43)       | -0.5<br>(-0.78 to -0.22)  |
| Saint Lucia                      | Diet low in milk            | 2<br>(1 to 2)                | 2.38<br>(1.08 to 2.99)       | 5<br>(2 to 6)                | 2.22<br>(0.92 to 3.01)       | -0.63<br>(-0.92 to -0.35) |
| Saint Lucia                      | Diet low in fiber           | 0<br>(0 to 0)                | 0.29<br>(0.1 to 0.6)         | 1<br>(0 to 2)                | 0.42<br>(0.16 to 0.76)       | 1.33<br>(1.16 to 1.5)     |
| Saint Lucia                      | Diet low in calcium         | 2<br>(1 to 2)                | 2.03<br>(1.45 to 2.68)       | 4<br>(2 to 5)                | 1.76<br>(1.19 to 2.5)        | -0.64<br>(-0.97 to -0.3)  |
| Saint Lucia                      | Diet high in red meat       | 0<br>(0 to 1)                | 0.38<br>(0.03 to 1.01)       | 1<br>(0 to 2)                | 0.37<br>(0.03 to 1)          | -0.8<br>(-1.11 to -0.49)  |
| Saint Lucia                      | Diet high in processed meat | 0<br>(0 to 0)                | 0.13<br>(0.03 to 0.23)       | 0<br>(0 to 1)                | 0.13<br>(0.03 to 0.25)       | -0.34<br>(-0.63 to -0.06) |
| Saint Lucia                      | Diet low in whole grains    | 2<br>(1 to 2)                | 2.38<br>(1.08 to 2.99)       | 5<br>(2 to 6)                | 2.22<br>(0.92 to 3.01)       | -0.63<br>(-0.92 to -0.35) |
| Saint Vincent and the Grenadines | All dietary risks           | 3<br>(3 to 4)                | 4.78<br>(3.8 to 5.54)        | 6<br>(5 to 8)                | 4.93<br>(3.54 to 6.1)        | -0.08<br>(-0.33 to 0.17)  |
| Saint Vincent and the Grenadines | Diet low in milk            | 2<br>(1 to 2)                | 2.21<br>(0.94 to 2.79)       | 3<br>(1 to 4)                | 2.46<br>(0.94 to 3.29)       | 0.27<br>(0.04 to 0.5)     |
| Saint Vincent and the Grenadines | Diet low in fiber           | 0<br>(0 to 0)                | 0.33<br>(0.11 to 0.67)       | 0<br>(0 to 1)                | 0.33<br>(0.11 to 0.66)       | -0.54<br>(-0.76 to -0.31) |
| Saint Vincent and the Grenadines | Diet low in calcium         | 2<br>(1 to 2)                | 2.64<br>(2.12 to 3.28)       | 3<br>(2 to 4)                | 2.31<br>(1.61 to 3.17)       | -0.81<br>(-1.12 to -0.5)  |
| Saint Vincent and the Grenadines | Diet high in red meat       | 0<br>(0 to 0)                | 0.23<br>(0.03 to 0.59)       | 0<br>(0 to 1)                | 0.33<br>(0.03 to 0.91)       | 1.29<br>(1.15 to 1.43)    |
| Saint Vincent and the Grenadines | Diet high in processed meat | 0<br>(0 to 0)                | 0.12<br>(0.03 to 0.22)       | 0<br>(0 to 0)                | 0.17<br>(0.03 to 0.31)       | 1.2<br>(1.01 to 1.38)     |



| Countries                        | Risk factors                | 1990                         |                              | 2019                         |                              | 1990-2019                 |
|----------------------------------|-----------------------------|------------------------------|------------------------------|------------------------------|------------------------------|---------------------------|
|                                  |                             | Number of deaths<br>(95% UI) | ASDR per 100,000<br>(95% UI) | Number of deaths<br>(95% UI) | ASDR per 100,000<br>(95% UI) | EAPC of ASDR<br>(95% CI)  |
| Saint Vincent and the Grenadines | Diet low in whole grains    | 2<br>(1 to 2)                | 2.21<br>(0.94 to 2.79)       | 3<br>(1 to 4)                | 2.46<br>(0.94 to 3.29)       | 0.27<br>(0.04 to 0.5)     |
| Samoa                            | All dietary risks           | 3<br>(3 to 4)                | 4.02<br>(3.08 to 5.03)       | 5<br>(4 to 7)                | 3.72<br>(2.67 to 4.81)       | -0.4<br>(-0.46 to -0.34)  |
| Samoa                            | Diet low in milk            | 1<br>(1 to 2)                | 1.8<br>(0.67 to 2.46)        | 2<br>(1 to 3)                | 1.76<br>(0.66 to 2.49)       | -0.1<br>(-0.15 to -0.05)  |
| Samoa                            | Diet low in fiber           | 0<br>(0 to 0)                | 0.02<br>(0.02 to 0.03)       | 0<br>(0 to 0)                | 0.02<br>(0.02 to 0.03)       | -0.27<br>(-0.32 to -0.22) |
| Samoa                            | Diet low in calcium         | 2<br>(1 to 3)                | 2.36<br>(1.83 to 3.06)       | 3<br>(2 to 4)                | 2.03<br>(1.48 to 2.69)       | -0.74<br>(-0.84 to -0.65) |
| Samoa                            | Diet high in red meat       | 0<br>(0 to 1)                | 0.31<br>(0.03 to 0.86)       | 0<br>(0 to 1)                | 0.31<br>(0.03 to 0.83)       | -0.05<br>(-0.09 to -0.01) |
| Samoa                            | Diet high in processed meat | 0<br>(0 to 0)                | 0.09<br>(0.03 to 0.16)       | 0<br>(0 to 0)                | 0.09<br>(0.02 to 0.18)       | 0.2<br>(0.15 to 0.25)     |
| Samoa                            | Diet low in whole grains    | 1<br>(1 to 2)                | 1.8<br>(0.67 to 2.46)        | 2<br>(1 to 3)                | 1.76<br>(0.66 to 2.49)       | -0.1<br>(-0.15 to -0.05)  |
| San Marino                       | All dietary risks           | 2<br>(2 to 3)                | 7.34<br>(5.07 to 9.38)       | 5<br>(3 to 7)                | 6.6<br>(3.89 to 9.95)        | -0.18<br>(-0.27 to -0.09) |
| San Marino                       | Diet low in milk            | 1<br>(1 to 2)                | 4.03<br>(1.55 to 5.39)       | 3<br>(1 to 4)                | 3.63<br>(1.32 to 5.7)        | -0.16<br>(-0.25 to -0.07) |
| San Marino                       | Diet low in fiber           | 0<br>(0 to 0)                | 0.36<br>(0.12 to 0.84)       | 0<br>(0 to 1)                | 0.33<br>(0.1 to 0.79)        | -0.28<br>(-0.68 to 0.13)  |
| San Marino                       | Diet low in calcium         | 0<br>(0 to 0)                | 0.79<br>(0.3 to 1.38)        | 1<br>(0 to 1)                | 0.74<br>(0.28 to 1.38)       | -0.47<br>(-1.25 to 0.32)  |
| San Marino                       | Diet high in red meat       | 1<br>(0 to 1)                | 1.71<br>(0.49 to 3.12)       | 1<br>(0 to 2)                | 1.5<br>(0.38 to 3.06)        | -0.18<br>(-0.33 to -0.03) |
| San Marino                       | Diet high in processed meat | 0<br>(0 to 1)                | 1.38<br>(0.42 to 2.19)       | 1<br>(0 to 2)                | 1.24<br>(0.37 to 2.23)       | -0.14<br>(-0.25 to -0.03) |
| San Marino                       | Diet low in whole grains    | 1<br>(1 to 2)                | 4.03<br>(1.55 to 5.39)       | 3<br>(1 to 4)                | 3.63<br>(1.32 to 5.7)        | -0.16<br>(-0.25 to -0.07) |
| Sao Tome and Principe            | All dietary risks           | 2<br>(2 to 3)                | 4.01<br>(3.07 to 4.87)       | 5<br>(4 to 8)                | 6<br>(4.06 to 8.41)          | 1.45<br>(1.39 to 1.52)    |
| Sao Tome and Principe            | Diet low in milk            | 1<br>(0 to 1)                | 1.66<br>(0.63 to 2.23)       | 2<br>(1 to 4)                | 2.58<br>(0.9 to 3.93)        | 1.63<br>(1.57 to 1.68)    |
| Sao Tome and Principe            | Diet low in fiber           | 0<br>(0 to 0)                | 0.03<br>(0.02 to 0.04)       | 0<br>(0 to 0)                | 0.03<br>(0.02 to 0.05)       | 1.25<br>(1.12 to 1.38)    |

| Countries             | Risk factors                | 1990                         |                              | 2019                         |                              | 1990-2019                 |
|-----------------------|-----------------------------|------------------------------|------------------------------|------------------------------|------------------------------|---------------------------|
|                       |                             | Number of deaths<br>(95% UI) | ASDR per 100,000<br>(95% UI) | Number of deaths<br>(95% UI) | ASDR per 100,000<br>(95% UI) | EAPC of ASDR<br>(95% CI)  |
| Sao Tome and Principe | Diet low in calcium         | 2<br>(1 to 2)                | 2.59<br>(1.95 to 3.22)       | 3<br>(2 to 5)                | 3.71<br>(2.53 to 5.33)       | 1.29<br>(1.21 to 1.36)    |
| Sao Tome and Principe | Diet high in red meat       | 0<br>(0 to 0)                | 0.09<br>(0.03 to 0.18)       | 0<br>(0 to 0)                | 0.14<br>(0.04 to 0.34)       | 1.94<br>(1.81 to 2.08)    |
| Sao Tome and Principe | Diet high in processed meat | 0<br>(0 to 0)                | 0.23<br>(0.03 to 0.41)       | 0<br>(0 to 1)                | 0.37<br>(0.04 to 0.75)       | 1.74<br>(1.68 to 1.79)    |
| Sao Tome and Principe | Diet low in whole grains    | 1<br>(0 to 1)                | 1.66<br>(0.63 to 2.23)       | 2<br>(1 to 4)                | 2.58<br>(0.9 to 3.93)        | 1.63<br>(1.57 to 1.68)    |
| Saudi Arabia          | All dietary risks           | 118<br>(74 to 169)           | 2.21<br>(1.38 to 3.1)        | 479<br>(301 to 664)          | 2.88<br>(1.83 to 3.85)       | 0.8<br>(0.57 to 1.02)     |
| Saudi Arabia          | Diet low in milk            | 62<br>(23 to 93)             | 1.15<br>(0.44 to 1.72)       | 274<br>(102 to 390)          | 1.63<br>(0.6 to 2.25)        | 1.11<br>(0.89 to 1.34)    |
| Saudi Arabia          | Diet low in fiber           | 3<br>(1 to 8)                | 0.06<br>(0.02 to 0.15)       | 11<br>(4 to 25)              | 0.06<br>(0.03 to 0.15)       | 0.67<br>(0.52 to 0.82)    |
| Saudi Arabia          | Diet low in calcium         | 56<br>(32 to 86)             | 1.06<br>(0.61 to 1.62)       | 190<br>(111 to 296)          | 1.19<br>(0.73 to 1.83)       | 0.23<br>(-0.02 to 0.48)   |
| Saudi Arabia          | Diet high in red meat       | 8<br>(1 to 24)               | 0.14<br>(0.01 to 0.43)       | 36<br>(3 to 99)              | 0.2<br>(0.02 to 0.54)        | 1.01<br>(0.87 to 1.15)    |
| Saudi Arabia          | Diet high in processed meat | 3<br>(1 to 6)                | 0.06<br>(0.01 to 0.11)       | 18<br>(3 to 35)              | 0.1<br>(0.02 to 0.18)        | 1.82<br>(1.65 to 1.99)    |
| Saudi Arabia          | Diet low in whole grains    | 62<br>(23 to 93)             | 1.15<br>(0.44 to 1.72)       | 274<br>(102 to 390)          | 1.63<br>(0.6 to 2.25)        | 1.11<br>(0.89 to 1.34)    |
| Senegal               | All dietary risks           | 93<br>(71 to 116)            | 3.19<br>(2.45 to 3.93)       | 224<br>(165 to 290)          | 3.36<br>(2.52 to 4.29)       | 0.26<br>(0.11 to 0.42)    |
| Senegal               | Diet low in milk            | 36<br>(13 to 49)             | 1.23<br>(0.45 to 1.66)       | 89<br>(33 to 128)            | 1.33<br>(0.49 to 1.9)        | 0.34<br>(0.19 to 0.5)     |
| Senegal               | Diet low in fiber           | 5<br>(2 to 11)               | 0.18<br>(0.06 to 0.38)       | 3<br>(1 to 6)                | 0.05<br>(0.02 to 0.1)        | -5.22<br>(-5.85 to -4.58) |
| Senegal               | Diet low in calcium         | 57<br>(43 to 73)             | 1.98<br>(1.5 to 2.51)        | 137<br>(98 to 180)           | 2.07<br>(1.52 to 2.68)       | 0.23<br>(0.08 to 0.37)    |
| Senegal               | Diet high in red meat       | 4<br>(0 to 12)               | 0.15<br>(0.02 to 0.39)       | 12<br>(1 to 32)              | 0.17<br>(0.02 to 0.46)       | 0.69<br>(0.48 to 0.9)     |
| Senegal               | Diet high in processed meat | 5<br>(1 to 10)               | 0.18<br>(0.02 to 0.33)       | 15<br>(2 to 28)              | 0.21<br>(0.03 to 0.4)        | 0.9<br>(0.68 to 1.12)     |
| Senegal               | Diet low in whole grains    | 36<br>(13 to 49)             | 1.23<br>(0.45 to 1.66)       | 89<br>(33 to 128)            | 1.33<br>(0.49 to 1.9)        | 0.34<br>(0.19 to 0.5)     |

| Countries    | Risk factors                | 1990                         |                              | 2019                         |                              | 1990-2019                 |
|--------------|-----------------------------|------------------------------|------------------------------|------------------------------|------------------------------|---------------------------|
|              |                             | Number of deaths<br>(95% UI) | ASDR per 100,000<br>(95% UI) | Number of deaths<br>(95% UI) | ASDR per 100,000<br>(95% UI) | EAPC of ASDR<br>(95% CI)  |
| Serbia       | All dietary risks           | 694<br>(466 to 890)          | 6.45<br>(4.34 to 8.31)       | 1213<br>(778 to 1637)        | 7.68<br>(4.96 to 10.33)      | 0.71<br>(0.55 to 0.88)    |
| Serbia       | Diet low in milk            | 386<br>(149 to 510)          | 3.58<br>(1.37 to 4.78)       | 682<br>(259 to 948)          | 4.3<br>(1.62 to 5.97)        | 0.82<br>(0.67 to 0.98)    |
| Serbia       | Diet low in fiber           | 38<br>(13 to 88)             | 0.36<br>(0.12 to 0.84)       | 63<br>(21 to 144)            | 0.41<br>(0.14 to 0.93)       | 0.05<br>(-0.31 to 0.42)   |
| Serbia       | Diet low in calcium         | 208<br>(108 to 347)          | 1.97<br>(1.03 to 3.25)       | 367<br>(194 to 613)          | 2.32<br>(1.22 to 3.86)       | 0.47<br>(0.24 to 0.71)    |
| Serbia       | Diet high in red meat       | 69<br>(6 to 186)             | 0.64<br>(0.05 to 1.72)       | 120<br>(11 to 329)           | 0.77<br>(0.07 to 2.11)       | 1.03<br>(0.82 to 1.24)    |
| Serbia       | Diet high in processed meat | 76<br>(11 to 132)            | 0.69<br>(0.1 to 1.2)         | 125<br>(17 to 220)           | 0.8<br>(0.11 to 1.42)        | 0.73<br>(0.6 to 0.86)     |
| Serbia       | Diet low in whole grains    | 386<br>(149 to 510)          | 3.58<br>(1.37 to 4.78)       | 682<br>(259 to 948)          | 4.3<br>(1.62 to 5.97)        | 0.82<br>(0.67 to 0.98)    |
| Seychelles   | All dietary risks           | 3<br>(3 to 4)                | 5.81<br>(4.57 to 6.99)       | 8<br>(6 to 10)               | 8.14<br>(6.09 to 10.13)      | 0.85<br>(0.64 to 1.07)    |
| Seychelles   | Diet low in milk            | 1<br>(0 to 2)                | 2.2<br>(0.83 to 3.11)        | 4<br>(1 to 5)                | 3.46<br>(1.29 to 4.95)       | 1.22<br>(0.96 to 1.47)    |
| Seychelles   | Diet low in fiber           | 0<br>(0 to 1)                | 0.6<br>(0.23 to 1.09)        | 1<br>(0 to 1)                | 0.53<br>(0.17 to 1.14)       | -0.66<br>(-0.76 to -0.57) |
| Seychelles   | Diet low in calcium         | 2<br>(2 to 2)                | 3.41<br>(2.7 to 4.29)        | 5<br>(3 to 6)                | 4.49<br>(3.24 to 5.89)       | 0.66<br>(0.46 to 0.87)    |
| Seychelles   | Diet high in red meat       | 0<br>(0 to 0)                | 0.26<br>(0.04 to 0.66)       | 0<br>(0 to 1)                | 0.44<br>(0.06 to 1.11)       | 1.41<br>(1.16 to 1.66)    |
| Seychelles   | Diet high in processed meat | 0<br>(0 to 0)                | 0.1<br>(0.06 to 0.15)        | 0<br>(0 to 0)                | 0.17<br>(0.09 to 0.28)       | 1.66<br>(1.42 to 1.89)    |
| Seychelles   | Diet low in whole grains    | 1<br>(0 to 2)                | 2.2<br>(0.83 to 3.11)        | 4<br>(1 to 5)                | 3.46<br>(1.29 to 4.95)       | 1.22<br>(0.96 to 1.47)    |
| Sierra Leone | All dietary risks           | 49<br>(37 to 62)             | 2.75<br>(2.1 to 3.43)        | 94<br>(67 to 126)            | 2.95<br>(2.15 to 3.86)       | 0.44<br>(0.31 to 0.58)    |
| Sierra Leone | Diet low in milk            | 16<br>(6 to 23)              | 0.9<br>(0.33 to 1.3)         | 32<br>(12 to 48)             | 1.01<br>(0.37 to 1.5)        | 0.61<br>(0.47 to 0.74)    |
| Sierra Leone | Diet low in fiber           | 8<br>(4 to 12)               | 0.45<br>(0.22 to 0.66)       | 10<br>(4 to 18)              | 0.33<br>(0.14 to 0.56)       | -1.13<br>(-1.24 to -1.03) |
| Sierra Leone | Diet low in calcium         | 31<br>(22 to 40)             | 1.73<br>(1.26 to 2.22)       | 60<br>(42 to 81)             | 1.89<br>(1.34 to 2.53)       | 0.51<br>(0.38 to 0.65)    |

| Countries    | Risk factors                   | 1990                            |                                 | 2019                            |                                 | 1990-2019                 |
|--------------|--------------------------------|---------------------------------|---------------------------------|---------------------------------|---------------------------------|---------------------------|
|              |                                | Number of<br>deaths<br>(95% UI) | ASDR per<br>100,000<br>(95% UI) | Number of<br>deaths<br>(95% UI) | ASDR per<br>100,000<br>(95% UI) | EAPC of ASDR<br>(95% CI)  |
| Sierra Leone | Diet high in red<br>meat       | 1<br>(0 to 2)                   | 0.06<br>(0.01 to 0.13)          | 3<br>(0 to 6)                   | 0.08<br>(0.01 to 0.19)          | 1.47<br>(1.21 to 1.73)    |
| Sierra Leone | Diet high in<br>processed meat | 2<br>(0 to 4)                   | 0.12<br>(0.01 to 0.23)          | 5<br>(1 to 10)                  | 0.15<br>(0.02 to 0.29)          | 0.89<br>(0.7 to 1.07)     |
| Sierra Leone | Diet low in<br>whole grains    | 16<br>(6 to 23)                 | 0.9<br>(0.33 to 1.3)            | 32<br>(12 to 48)                | 1.01<br>(0.37 to 1.5)           | 0.61<br>(0.47 to 0.74)    |
| Singapore    | All dietary risks              | 160<br>(118 to 199)             | 7.98<br>(5.91 to 9.86)          | 332<br>(233 to 424)             | 4.45<br>(3.12 to 5.67)          | -2.25<br>(-2.36 to -2.15) |
| Singapore    | Diet low in milk               | 69<br>(26 to 95)                | 3.39<br>(1.26 to 4.69)          | 155<br>(59 to 212)              | 2.07<br>(0.78 to 2.84)          | -1.99<br>(-2.12 to -1.87) |
| Singapore    | Diet low in fiber              | 16<br>(6 to 30)                 | 0.82<br>(0.32 to 1.52)          | 28<br>(10 to 55)                | 0.38<br>(0.14 to 0.75)          | -2.8<br>(-2.91 to -2.7)   |
| Singapore    | Diet low in<br>calcium         | 71<br>(48 to 99)                | 3.6<br>(2.44 to 4.97)           | 116<br>(66 to 180)              | 1.57<br>(0.9 to 2.43)           | -3.08<br>(-3.18 to -2.98) |
| Singapore    | Diet high in red<br>meat       | 18<br>(2 to 44)                 | 0.86<br>(0.09 to 2.14)          | 52<br>(9 to 114)                | 0.68<br>(0.12 to 1.52)          | -1.03<br>(-1.12 to -0.93) |
| Singapore    | Diet high in<br>processed meat | 8<br>(1 to 14)                  | 0.38<br>(0.05 to 0.68)          | 25<br>(3 to 44)                 | 0.33<br>(0.04 to 0.58)          | -0.61<br>(-0.7 to -0.53)  |
| Singapore    | Diet low in<br>whole grains    | 69<br>(26 to 95)                | 3.39<br>(1.26 to 4.69)          | 155<br>(59 to 212)              | 2.07<br>(0.78 to 2.84)          | -1.99<br>(-2.12 to -1.87) |
| Slovakia     | All dietary risks              | 476<br>(347 to 584)             | 8.03<br>(5.87 to 9.84)          | 851<br>(575 to 1131)            | 9.21<br>(6.21 to 12.24)         | 0.49<br>(0.31 to 0.67)    |
| Slovakia     | Diet low in milk               | 230<br>(86 to 300)              | 3.88<br>(1.45 to 5.04)          | 405<br>(150 to 566)             | 4.38<br>(1.63 to 6.11)          | 0.39<br>(0.21 to 0.57)    |
| Slovakia     | Diet low in fiber              | 35<br>(12 to 72)                | 0.6<br>(0.21 to 1.22)           | 78<br>(27 to 150)               | 0.84<br>(0.29 to 1.64)          | 1.36<br>(0.96 to 1.77)    |
| Slovakia     | Diet low in<br>calcium         | 172<br>(108 to 255)             | 2.9<br>(1.82 to 4.29)           | 273<br>(157 to 428)             | 2.96<br>(1.7 to 4.62)           | 0.04<br>(-0.19 to 0.28)   |
| Slovakia     | Diet high in red<br>meat       | 56<br>(7 to 133)                | 0.94<br>(0.12 to 2.23)          | 110<br>(18 to 255)              | 1.2<br>(0.19 to 2.76)           | 0.88<br>(0.64 to 1.12)    |
| Slovakia     | Diet high in<br>processed meat | 52<br>(9 to 87)                 | 0.88<br>(0.15 to 1.46)          | 119<br>(28 to 202)              | 1.29<br>(0.31 to 2.18)          | 1.62<br>(1.41 to 1.83)    |
| Slovakia     | Diet low in<br>whole grains    | 230<br>(86 to 300)              | 3.88<br>(1.45 to 5.04)          | 405<br>(150 to 566)             | 4.38<br>(1.63 to 6.11)          | 0.39<br>(0.21 to 0.57)    |
| Slovenia     | All dietary risks              | 167<br>(111 to 227)             | 6.89<br>(4.59 to 9.35)          | 273<br>(184 to 371)             | 5.93<br>(4.01 to 8.09)          | -0.74<br>(-1.03 to -0.45) |

| Countries       | Risk factors                | 1990                         |                              | 2019                         |                              | 1990-2019                 |
|-----------------|-----------------------------|------------------------------|------------------------------|------------------------------|------------------------------|---------------------------|
|                 |                             | Number of deaths<br>(95% UI) | ASDR per 100,000<br>(95% UI) | Number of deaths<br>(95% UI) | ASDR per 100,000<br>(95% UI) | EAPC of ASDR<br>(95% CI)  |
| Slovenia        | Diet low in milk            | 82<br>(30 to 115)            | 3.37<br>(1.23 to 4.78)       | 140<br>(51 to 201)           | 3.05<br>(1.11 to 4.4)        | -0.55<br>(-0.84 to -0.26) |
| Slovenia        | Diet low in fiber           | 9<br>(3 to 22)               | 0.39<br>(0.12 to 0.91)       | 14<br>(5 to 32)              | 0.3<br>(0.1 to 0.67)         | -1.25<br>(-1.41 to -1.09) |
| Slovenia        | Diet low in calcium         | 34<br>(15 to 62)             | 1.41<br>(0.64 to 2.56)       | 45<br>(20 to 81)             | 0.94<br>(0.42 to 1.74)       | -1.77<br>(-1.95 to -1.6)  |
| Slovenia        | Diet high in red meat       | 32<br>(7 to 64)              | 1.31<br>(0.3 to 2.64)        | 49<br>(9 to 108)             | 1.1<br>(0.21 to 2.37)        | -0.83<br>(-1.25 to -0.41) |
| Slovenia        | Diet high in processed meat | 33<br>(11 to 54)             | 1.37<br>(0.45 to 2.24)       | 59<br>(19 to 97)             | 1.3<br>(0.44 to 2.13)        | -0.36<br>(-0.72 to 0)     |
| Slovenia        | Diet low in whole grains    | 82<br>(30 to 115)            | 3.37<br>(1.23 to 4.78)       | 140<br>(51 to 201)           | 3.05<br>(1.11 to 4.4)        | -0.55<br>(-0.84 to -0.26) |
| Solomon Islands | All dietary risks           | 4<br>(3 to 6)                | 3.19<br>(2.12 to 4.53)       | 11<br>(7 to 16)              | 3.78<br>(2.59 to 5.11)       | 0.48<br>(0.39 to 0.57)    |
| Solomon Islands | Diet low in milk            | 2<br>(1 to 3)                | 1.4<br>(0.55 to 2.16)        | 5<br>(2 to 7)                | 1.65<br>(0.6 to 2.39)        | 0.45<br>(0.35 to 0.55)    |
| Solomon Islands | Diet low in fiber           | 0<br>(0 to 0)                | 0.02<br>(0.01 to 0.04)       | 0<br>(0 to 0)                | 0.03<br>(0.02 to 0.04)       | 0.47<br>(0.39 to 0.56)    |
| Solomon Islands | Diet low in calcium         | 3<br>(2 to 4)                | 1.96<br>(1.29 to 2.84)       | 7<br>(4 to 10)               | 2.31<br>(1.56 to 3.16)       | 0.47<br>(0.39 to 0.55)    |
| Solomon Islands | Diet high in red meat       | 0<br>(0 to 1)                | 0.16<br>(0.02 to 0.48)       | 1<br>(0 to 2)                | 0.18<br>(0.02 to 0.51)       | 0.36<br>(0.16 to 0.55)    |
| Solomon Islands | Diet high in processed meat | 0<br>(0 to 0)                | 0.06<br>(0.02 to 0.12)       | 0<br>(0 to 1)                | 0.08<br>(0.03 to 0.15)       | 0.93<br>(0.83 to 1.02)    |
| Solomon Islands | Diet low in whole grains    | 2<br>(1 to 3)                | 1.4<br>(0.55 to 2.16)        | 5<br>(2 to 7)                | 1.65<br>(0.6 to 2.39)        | 0.45<br>(0.35 to 0.55)    |
| Somalia         | All dietary risks           | 54<br>(37 to 84)             | 2.3<br>(1.59 to 3.58)        | 136<br>(83 to 261)           | 2.22<br>(1.35 to 4.22)       | 0.04<br>(-0.03 to 0.1)    |
| Somalia         | Diet low in milk            | 20<br>(7 to 32)              | 0.85<br>(0.31 to 1.36)       | 51<br>(17 to 99)             | 0.82<br>(0.28 to 1.61)       | 0.09<br>(0.02 to 0.16)    |
| Somalia         | Diet low in fiber           | 6<br>(2 to 10)               | 0.24<br>(0.09 to 0.44)       | 17<br>(6 to 35)              | 0.28<br>(0.1 to 0.57)        | 0.43<br>(0.23 to 0.62)    |
| Somalia         | Diet low in calcium         | 33<br>(22 to 50)             | 1.39<br>(0.95 to 2.17)       | 81<br>(49 to 156)            | 1.33<br>(0.8 to 2.55)        | 0.01<br>(-0.07 to 0.08)   |
| Somalia         | Diet high in red meat       | 4<br>(0 to 12)               | 0.16<br>(0.01 to 0.47)       | 8<br>(1 to 29)               | 0.13<br>(0.01 to 0.45)       | -0.45<br>(-0.54 to -0.36) |

| Countries    | Risk factors                | 1990                         |                              | 2019                         |                              | 1990-2019                 |
|--------------|-----------------------------|------------------------------|------------------------------|------------------------------|------------------------------|---------------------------|
|              |                             | Number of deaths<br>(95% UI) | ASDR per 100,000<br>(95% UI) | Number of deaths<br>(95% UI) | ASDR per 100,000<br>(95% UI) | EAPC of ASDR<br>(95% CI)  |
| Somalia      | Diet high in processed meat | 2<br>(0 to 4)                | 0.07<br>(0.01 to 0.16)       | 4<br>(1 to 11)               | 0.07<br>(0.01 to 0.17)       | -0.01<br>(-0.15 to 0.13)  |
| Somalia      | Diet low in whole grains    | 20<br>(7 to 32)              | 0.85<br>(0.31 to 1.36)       | 51<br>(17 to 99)             | 0.82<br>(0.28 to 1.61)       | 0.09<br>(0.02 to 0.16)    |
| South Africa | All dietary risks           | 736<br>(559 to 952)          | 3.78<br>(2.85 to 4.96)       | 1693<br>(1327 to 2070)       | 4.12<br>(3.2 to 5.02)        | 0.3<br>(0.06 to 0.54)     |
| South Africa | Diet low in milk            | 243<br>(92 to 368)           | 1.24<br>(0.47 to 1.91)       | 572<br>(214 to 826)          | 1.39<br>(0.52 to 2)          | 0.41<br>(0.16 to 0.65)    |
| South Africa | Diet low in fiber           | 16<br>(7 to 35)              | 0.08<br>(0.03 to 0.18)       | 41<br>(17 to 90)             | 0.1<br>(0.04 to 0.22)        | 0.66<br>(0.44 to 0.88)    |
| South Africa | Diet low in calcium         | 476<br>(361 to 621)          | 2.46<br>(1.84 to 3.25)       | 1063<br>(851 to 1321)        | 2.6<br>(2.08 to 3.23)        | 0.14<br>(-0.11 to 0.4)    |
| South Africa | Diet high in red meat       | 70<br>(9 to 180)             | 0.35<br>(0.04 to 0.92)       | 178<br>(27 to 419)           | 0.42<br>(0.06 to 1)          | 0.9<br>(0.71 to 1.08)     |
| South Africa | Diet high in processed meat | 26<br>(5 to 49)              | 0.13<br>(0.02 to 0.25)       | 70<br>(11 to 125)            | 0.16<br>(0.03 to 0.29)       | 1<br>(0.8 to 1.2)         |
| South Africa | Diet low in whole grains    | 243<br>(92 to 368)           | 1.24<br>(0.47 to 1.91)       | 572<br>(214 to 826)          | 1.39<br>(0.52 to 2)          | 0.41<br>(0.16 to 0.65)    |
| South Sudan  | All dietary risks           | 81<br>(46 to 135)            | 3.67<br>(2.12 to 6.09)       | 121<br>(76 to 187)           | 3.53<br>(2.24 to 5.4)        | -0.12<br>(-0.18 to -0.05) |
| South Sudan  | Diet low in milk            | 33<br>(12 to 60)             | 1.49<br>(0.52 to 2.7)        | 50<br>(19 to 83)             | 1.46<br>(0.54 to 2.39)       | -0.03<br>(-0.1 to 0.04)   |
| South Sudan  | Diet low in fiber           | 1<br>(0 to 2)                | 0.03<br>(0.02 to 0.08)       | 1<br>(1 to 2)                | 0.03<br>(0.02 to 0.06)       | -0.4<br>(-0.46 to -0.35)  |
| South Sudan  | Diet low in calcium         | 49<br>(27 to 84)             | 2.23<br>(1.27 to 3.81)       | 72<br>(44 to 111)            | 2.11<br>(1.32 to 3.22)       | -0.21<br>(-0.27 to -0.16) |
| South Sudan  | Diet high in red meat       | 5<br>(0 to 15)               | 0.21<br>(0.02 to 0.67)       | 7<br>(1 to 22)               | 0.21<br>(0.02 to 0.61)       | 0.05<br>(-0.05 to 0.15)   |
| South Sudan  | Diet high in processed meat | 4<br>(0 to 9)                | 0.17<br>(0.02 to 0.41)       | 6<br>(1 to 14)               | 0.17<br>(0.02 to 0.36)       | 0.09<br>(-0.02 to 0.2)    |
| South Sudan  | Diet low in whole grains    | 33<br>(12 to 60)             | 1.49<br>(0.52 to 2.7)        | 50<br>(19 to 83)             | 1.46<br>(0.54 to 2.39)       | -0.03<br>(-0.1 to 0.04)   |
| Spain        | All dietary risks           | 3563<br>(2644 to 4334)       | 6.57<br>(4.89 to 7.98)       | 6817<br>(4968 to 8519)       | 6.43<br>(4.71 to 8.02)       | -0.05<br>(-0.11 to 0)     |

| Countries | Risk factors                   | 1990                            |                                 | 2019                            |                                 | 1990-2019                 |
|-----------|--------------------------------|---------------------------------|---------------------------------|---------------------------------|---------------------------------|---------------------------|
|           |                                | Number of<br>deaths<br>(95% UI) | ASDR per<br>100,000<br>(95% UI) | Number of<br>deaths<br>(95% UI) | ASDR per<br>100,000<br>(95% UI) | EAPC of ASDR<br>(95% CI)  |
| Spain     | Diet low in milk               | 1730<br>(656 to 2218)           | 3.19<br>(1.21 to 4.08)          | 3228<br>(1228 to 4234)          | 3.03<br>(1.15 to 3.95)          | -0.18<br>(-0.23 to -0.12) |
| Spain     | Diet low in fiber              | 170<br>(58 to 389)              | 0.32<br>(0.11 to 0.72)          | 438<br>(154 to 929)             | 0.4<br>(0.14 to 0.85)           | 1.25<br>(1.06 to 1.45)    |
| Spain     | Diet low in<br>calcium         | 861<br>(453 to 1475)            | 1.58<br>(0.83 to 2.72)          | 1810<br>(974 to 3015)           | 1.67<br>(0.89 to 2.81)          | 0.55<br>(0.42 to 0.69)    |
| Spain     | Diet high in red<br>meat       | 687<br>(173 to 1275)            | 1.28<br>(0.33 to 2.37)          | 1214<br>(275 to 2359)           | 1.2<br>(0.29 to 2.26)           | -0.73<br>(-0.88 to -0.58) |
| Spain     | Diet high in<br>processed meat | 675<br>(231 to 1047)            | 1.24<br>(0.43 to 1.93)          | 1186<br>(335 to 1803)           | 1.14<br>(0.35 to 1.73)          | -0.26<br>(-0.37 to -0.16) |
| Spain     | Diet low in<br>whole grains    | 1730<br>(656 to 2218)           | 3.19<br>(1.21 to 4.08)          | 3228<br>(1228 to 4234)          | 3.03<br>(1.15 to 3.95)          | -0.18<br>(-0.23 to -0.12) |
| Sri Lanka | All dietary risks              | 183<br>(148 to 217)             | 1.89<br>(1.53 to 2.23)          | 529<br>(370 to 717)             | 2.25<br>(1.59 to 3)             | 0.99<br>(0.86 to 1.12)    |
| Sri Lanka | Diet low in milk               | 71<br>(27 to 96)                | 0.72<br>(0.27 to 0.98)          | 213<br>(78 to 318)              | 0.9<br>(0.33 to 1.35)           | 1.11<br>(0.99 to 1.23)    |
| Sri Lanka | Diet low in fiber              | 9<br>(3 to 21)                  | 0.1<br>(0.04 to 0.22)           | 18<br>(6 to 42)                 | 0.08<br>(0.03 to 0.19)          | -0.45<br>(-0.78 to -0.13) |
| Sri Lanka | Diet low in<br>calcium         | 120<br>(96 to 148)              | 1.24<br>(0.98 to 1.52)          | 337<br>(234 to 468)             | 1.44<br>(1.01 to 1.98)          | 0.9<br>(0.76 to 1.04)     |
| Sri Lanka | Diet high in red<br>meat       | 3<br>(1 to 7)                   | 0.03<br>(0.01 to 0.07)          | 11<br>(3 to 24)                 | 0.05<br>(0.01 to 0.1)           | 1.4<br>(1.29 to 1.51)     |
| Sri Lanka | Diet high in<br>processed meat | 3<br>(2 to 5)                   | 0.03<br>(0.02 to 0.04)          | 11<br>(4 to 18)                 | 0.04<br>(0.02 to 0.08)          | 1.78<br>(1.66 to 1.9)     |
| Sri Lanka | Diet low in<br>whole grains    | 71<br>(27 to 96)                | 0.72<br>(0.27 to 0.98)          | 213<br>(78 to 318)              | 0.9<br>(0.33 to 1.35)           | 1.11<br>(0.99 to 1.23)    |
| Sudan     | All dietary risks              | 188<br>(134 to 286)             | 2.13<br>(1.55 to 3.28)          | 503<br>(345 to 766)             | 2.87<br>(1.98 to 4.41)          | 1.11<br>(1.03 to 1.19)    |
| Sudan     | Diet low in milk               | 92<br>(45 to 144)               | 1.04<br>(0.5 to 1.63)           | 258<br>(121 to 412)             | 1.47<br>(0.69 to 2.34)          | 1.29<br>(1.2 to 1.39)     |
| Sudan     | Diet low in fiber              | 12<br>(5 to 25)                 | 0.14<br>(0.05 to 0.29)          | 26<br>(9 to 55)                 | 0.15<br>(0.05 to 0.31)          | 0.09<br>(0.03 to 0.15)    |
| Sudan     | Diet low in<br>calcium         | 102<br>(71 to 156)              | 1.16<br>(0.83 to 1.79)          | 261<br>(175 to 405)             | 1.5<br>(1.03 to 2.31)           | 0.92<br>(0.85 to 0.99)    |
| Sudan     | Diet high in red<br>meat       | 9<br>(1 to 25)                  | 0.1<br>(0.01 to 0.28)           | 26<br>(3 to 77)                 | 0.14<br>(0.01 to 0.42)          | 1.41<br>(1.29 to 1.54)    |

| Countries   | Risk factors                | 1990                         |                              | 2019                         |                              | 1990-2019                 |
|-------------|-----------------------------|------------------------------|------------------------------|------------------------------|------------------------------|---------------------------|
|             |                             | Number of deaths<br>(95% UI) | ASDR per 100,000<br>(95% UI) | Number of deaths<br>(95% UI) | ASDR per 100,000<br>(95% UI) | EAPC of ASDR<br>(95% CI)  |
| Sudan       | Diet high in processed meat | 4<br>(1 to 7)                | 0.04<br>(0.01 to 0.07)       | 11<br>(3 to 22)              | 0.06<br>(0.02 to 0.12)       | 1.6<br>(1.48 to 1.72)     |
| Sudan       | Diet low in whole grains    | 92<br>(45 to 144)            | 1.04<br>(0.5 to 1.63)        | 258<br>(121 to 412)          | 1.47<br>(0.69 to 2.34)       | 1.29<br>(1.2 to 1.39)     |
| Suriname    | All dietary risks           | 11<br>(9 to 13)              | 4.52<br>(3.57 to 5.39)       | 35<br>(26 to 44)             | 6.03<br>(4.54 to 7.64)       | 1.05<br>(0.81 to 1.3)     |
| Suriname    | Diet low in milk            | 4<br>(2 to 6)                | 1.8<br>(0.67 to 2.46)        | 14<br>(5 to 19)              | 2.41<br>(0.89 to 3.35)       | 1.09<br>(0.85 to 1.34)    |
| Suriname    | Diet low in fiber           | 2<br>(1 to 3)                | 0.75<br>(0.34 to 1.12)       | 5<br>(2 to 8)                | 0.93<br>(0.41 to 1.48)       | 0.73<br>(0.47 to 0.99)    |
| Suriname    | Diet low in calcium         | 6<br>(4 to 7)                | 2.32<br>(1.75 to 2.99)       | 18<br>(13 to 24)             | 3.15<br>(2.29 to 4.14)       | 1.08<br>(0.81 to 1.34)    |
| Suriname    | Diet high in red meat       | 1<br>(0 to 1)                | 0.21<br>(0.03 to 0.52)       | 2<br>(0 to 4)                | 0.28<br>(0.04 to 0.7)        | 1.22<br>(0.92 to 1.52)    |
| Suriname    | Diet high in processed meat | 0<br>(0 to 1)                | 0.14<br>(0.03 to 0.26)       | 1<br>(0 to 2)                | 0.2<br>(0.04 to 0.38)        | 1.33<br>(1.08 to 1.58)    |
| Suriname    | Diet low in whole grains    | 4<br>(2 to 6)                | 1.8<br>(0.67 to 2.46)        | 14<br>(5 to 19)              | 2.41<br>(0.89 to 3.35)       | 1.09<br>(0.85 to 1.34)    |
| Sweden      | All dietary risks           | 901<br>(630 to 1111)         | 5.74<br>(4.06 to 7.06)       | 1128<br>(800 to 1400)        | 4.98<br>(3.53 to 6.19)       | -0.61<br>(-0.73 to -0.48) |
| Sweden      | Diet low in milk            | 497<br>(197 to 638)          | 3.17<br>(1.25 to 4.05)       | 627<br>(245 to 811)          | 2.76<br>(1.07 to 3.56)       | -0.59<br>(-0.73 to -0.45) |
| Sweden      | Diet low in fiber           | 89<br>(32 to 165)            | 0.56<br>(0.2 to 1.04)        | 77<br>(28 to 161)            | 0.33<br>(0.12 to 0.68)       | -2.15<br>(-2.29 to -2.01) |
| Sweden      | Diet low in calcium         | 106<br>(53 to 179)           | 0.64<br>(0.32 to 1.08)       | 104<br>(50 to 174)           | 0.44<br>(0.21 to 0.73)       | -1.61<br>(-1.71 to -1.5)  |
| Sweden      | Diet high in red meat       | 143<br>(29 to 302)           | 0.95<br>(0.2 to 1.96)        | 215<br>(53 to 418)           | 1<br>(0.26 to 1.88)          | 0.09<br>(-0.02 to 0.2)    |
| Sweden      | Diet high in processed meat | 184<br>(62 to 283)           | 1.18<br>(0.4 to 1.83)        | 248<br>(89 to 389)           | 1.11<br>(0.41 to 1.76)       | -0.27<br>(-0.41 to -0.13) |
| Sweden      | Diet low in whole grains    | 497<br>(197 to 638)          | 3.17<br>(1.25 to 4.05)       | 627<br>(245 to 811)          | 2.76<br>(1.07 to 3.56)       | -0.59<br>(-0.73 to -0.45) |
| Switzerland | All dietary risks           | 496<br>(360 to 604)          | 4.62<br>(3.37 to 5.61)       | 747<br>(534 to 924)          | 3.98<br>(2.88 to 4.9)        | -0.72<br>(-0.9 to -0.55)  |
| Switzerland | Diet low in milk            | 256<br>(95 to 331)           | 2.38<br>(0.88 to 3.08)       | 393<br>(151 to 516)          | 2.08<br>(0.8 to 2.73)        | -0.71<br>(-0.91 to -0.52) |



| Countries                     | Risk factors                | 1990                         |                              | 2019                         |                              | 1990-2019                 |
|-------------------------------|-----------------------------|------------------------------|------------------------------|------------------------------|------------------------------|---------------------------|
|                               |                             | Number of deaths<br>(95% UI) | ASDR per 100,000<br>(95% UI) | Number of deaths<br>(95% UI) | ASDR per 100,000<br>(95% UI) | EAPC of ASDR<br>(95% CI)  |
| Switzerland                   | Diet low in fiber           | 50<br>(19 to 93)             | 0.46<br>(0.17 to 0.85)       | 79<br>(30 to 146)            | 0.41<br>(0.16 to 0.76)       | -0.52<br>(-0.8 to -0.24)  |
| Switzerland                   | Diet low in calcium         | 52<br>(23 to 90)             | 0.46<br>(0.2 to 0.79)        | 90<br>(40 to 158)            | 0.45<br>(0.2 to 0.8)         | -0.17<br>(-0.42 to 0.08)  |
| Switzerland                   | Diet high in red meat       | 130<br>(40 to 217)           | 1.24<br>(0.39 to 2.04)       | 171<br>(51 to 303)           | 0.95<br>(0.29 to 1.64)       | -1.09<br>(-1.19 to -0.99) |
| Switzerland                   | Diet high in processed meat | 78<br>(19 to 121)            | 0.74<br>(0.18 to 1.13)       | 123<br>(34 to 191)           | 0.67<br>(0.18 to 1.03)       | -0.54<br>(-0.7 to -0.37)  |
| Switzerland                   | Diet low in whole grains    | 256<br>(95 to 331)           | 2.38<br>(0.88 to 3.08)       | 393<br>(151 to 516)          | 2.08<br>(0.8 to 2.73)        | -0.71<br>(-0.91 to -0.52) |
| Syrian Arab Republic          | All dietary risks           | 97<br>(67 to 128)            | 1.95<br>(1.36 to 2.59)       | 241<br>(156 to 342)          | 2.24<br>(1.49 to 3.1)        | 0.29<br>(0.07 to 0.51)    |
| Syrian Arab Republic          | Diet low in milk            | 54<br>(25 to 76)             | 1.09<br>(0.5 to 1.48)        | 140<br>(64 to 199)           | 1.29<br>(0.59 to 1.81)       | 0.49<br>(0.29 to 0.7)     |
| Syrian Arab Republic          | Diet low in fiber           | 4<br>(1 to 9)                | 0.08<br>(0.03 to 0.18)       | 10<br>(3 to 23)              | 0.1<br>(0.03 to 0.23)        | -0.05<br>(-0.41 to 0.32)  |
| Syrian Arab Republic          | Diet low in calcium         | 42<br>(27 to 60)             | 0.86<br>(0.57 to 1.21)       | 100<br>(61 to 154)           | 0.96<br>(0.61 to 1.43)       | 0.03<br>(-0.25 to 0.32)   |
| Syrian Arab Republic          | Diet high in red meat       | 7<br>(1 to 20)               | 0.13<br>(0.01 to 0.38)       | 16<br>(1 to 45)              | 0.14<br>(0.01 to 0.4)        | 0.06<br>(-0.15 to 0.28)   |
| Syrian Arab Republic          | Diet high in processed meat | 3<br>(1 to 5)                | 0.05<br>(0.01 to 0.1)        | 6<br>(2 to 13)               | 0.06<br>(0.01 to 0.11)       | 0.3<br>(0.09 to 0.52)     |
| Syrian Arab Republic          | Diet low in whole grains    | 54<br>(25 to 76)             | 1.09<br>(0.5 to 1.48)        | 140<br>(64 to 199)           | 1.29<br>(0.59 to 1.81)       | 0.49<br>(0.29 to 0.7)     |
| Taiwan<br>(Province of China) | All dietary risks           | 757<br>(549 to 933)          | 5.07<br>(3.68 to 6.23)       | 3485<br>(2400 to 4805)       | 8.82<br>(6.08 to 12.15)      | 2.12<br>(1.88 to 2.36)    |
| Taiwan<br>(Province of China) | Diet low in milk            | 362<br>(135 to 477)          | 2.4<br>(0.9 to 3.16)         | 1658<br>(589 to 2387)        | 4.19<br>(1.49 to 6.04)       | 1.93<br>(1.69 to 2.16)    |
| Taiwan<br>(Province of China) | Diet low in fiber           | 84<br>(31 to 150)            | 0.57<br>(0.21 to 1)          | 265<br>(90 to 532)           | 0.67<br>(0.23 to 1.35)       | 1.22<br>(0.93 to 1.52)    |
| Taiwan<br>(Province of China) | Diet low in calcium         | 288<br>(185 to 419)          | 1.97<br>(1.26 to 2.84)       | 1167<br>(666 to 1880)        | 2.95<br>(1.68 to 4.76)       | 1.86<br>(1.58 to 2.15)    |

| Countries                     | Risk factors                | 1990                         |                              | 2019                         |                              | 1990-2019                 |
|-------------------------------|-----------------------------|------------------------------|------------------------------|------------------------------|------------------------------|---------------------------|
|                               |                             | Number of deaths<br>(95% UI) | ASDR per 100,000<br>(95% UI) | Number of deaths<br>(95% UI) | ASDR per 100,000<br>(95% UI) | EAPC of ASDR<br>(95% CI)  |
| Taiwan<br>(Province of China) | Diet high in red meat       | 95<br>(13 to 225)            | 0.62<br>(0.08 to 1.49)       | 713<br>(189 to 1384)         | 1.81<br>(0.48 to 3.52)       | 3.86<br>(3.49 to 4.24)    |
| Taiwan<br>(Province of China) | Diet high in processed meat | 33<br>(5 to 59)              | 0.21<br>(0.03 to 0.38)       | 192<br>(23 to 367)           | 0.49<br>(0.06 to 0.93)       | 3.09<br>(2.87 to 3.31)    |
| Taiwan<br>(Province of China) | Diet low in whole grains    | 362<br>(135 to 477)          | 2.4<br>(0.9 to 3.16)         | 1658<br>(589 to 2387)        | 4.19<br>(1.49 to 6.04)       | 1.93<br>(1.69 to 2.16)    |
| Tajikistan                    | All dietary risks           | 109<br>(87 to 128)           | 3.77<br>(3.02 to 4.43)       | 182<br>(137 to 233)          | 4.41<br>(3.36 to 5.57)       | 1.12<br>(0.74 to 1.51)    |
| Tajikistan                    | Diet low in milk            | 54<br>(27 to 67)             | 1.88<br>(0.93 to 2.34)       | 90<br>(43 to 121)            | 2.17<br>(1.04 to 2.91)       | 1.16<br>(0.71 to 1.62)    |
| Tajikistan                    | Diet low in fiber           | 10<br>(4 to 18)              | 0.34<br>(0.12 to 0.61)       | 14<br>(5 to 26)              | 0.36<br>(0.13 to 0.65)       | 0.32<br>(0.16 to 0.47)    |
| Tajikistan                    | Diet low in calcium         | 52<br>(41 to 65)             | 1.8<br>(1.41 to 2.25)        | 90<br>(67 to 119)            | 2.22<br>(1.67 to 2.89)       | 1.23<br>(0.93 to 1.54)    |
| Tajikistan                    | Diet high in red meat       | 6<br>(1 to 17)               | 0.21<br>(0.02 to 0.57)       | 9<br>(1 to 25)               | 0.21<br>(0.02 to 0.56)       | 0.84<br>(0.13 to 1.56)    |
| Tajikistan                    | Diet high in processed meat | 8<br>(1 to 13)               | 0.26<br>(0.03 to 0.44)       | 12<br>(2 to 22)              | 0.27<br>(0.03 to 0.49)       | 0.78<br>(0.21 to 1.36)    |
| Tajikistan                    | Diet low in whole grains    | 54<br>(27 to 67)             | 1.88<br>(0.93 to 2.34)       | 90<br>(43 to 121)            | 2.17<br>(1.04 to 2.91)       | 1.16<br>(0.71 to 1.62)    |
| Thailand                      | All dietary risks           | 1517<br>(1230 to 1800)       | 4.6<br>(3.72 to 5.48)        | 4069<br>(2857 to 5580)       | 4.07<br>(2.87 to 5.57)       | -0.96<br>(-1.2 to -0.71)  |
| Thailand                      | Diet low in milk            | 472<br>(175 to 672)          | 1.43<br>(0.54 to 2.02)       | 1329<br>(490 to 2057)        | 1.33<br>(0.49 to 2.06)       | -0.79<br>(-1.06 to -0.53) |
| Thailand                      | Diet low in fiber           | 262<br>(134 to 375)          | 0.8<br>(0.41 to 1.14)        | 557<br>(242 to 960)          | 0.56<br>(0.24 to 0.96)       | -1.74<br>(-1.94 to -1.55) |
| Thailand                      | Diet low in calcium         | 953<br>(733 to 1177)         | 2.9<br>(2.23 to 3.59)        | 2491<br>(1727 to 3403)       | 2.49<br>(1.73 to 3.4)        | -1.05<br>(-1.3 to -0.8)   |
| Thailand                      | Diet high in red meat       | 74<br>(8 to 197)             | 0.22<br>(0.02 to 0.57)       | 242<br>(22 to 697)           | 0.24<br>(0.02 to 0.69)       | -0.2<br>(-0.46 to 0.06)   |
| Thailand                      | Diet high in processed meat | 17<br>(11 to 23)             | 0.05<br>(0.03 to 0.07)       | 66<br>(30 to 114)            | 0.07<br>(0.03 to 0.11)       | 0.48<br>(0.27 to 0.7)     |

| Countries   | Risk factors                | 1990                         |                              | 2019                         |                              | 1990-2019                 |
|-------------|-----------------------------|------------------------------|------------------------------|------------------------------|------------------------------|---------------------------|
|             |                             | Number of deaths<br>(95% UI) | ASDR per 100,000<br>(95% UI) | Number of deaths<br>(95% UI) | ASDR per 100,000<br>(95% UI) | EAPC of ASDR<br>(95% CI)  |
| Thailand    | Diet low in whole grains    | 472<br>(175 to 672)          | 1.43<br>(0.54 to 2.02)       | 1329<br>(490 to 2057)        | 1.33<br>(0.49 to 2.06)       | -0.79<br>(-1.06 to -0.53) |
| Timor-Leste | All dietary risks           | 8<br>(6 to 11)               | 3.02<br>(2.17 to 4.1)        | 37<br>(23 to 50)             | 4.9<br>(3.16 to 6.62)        | 2.05<br>(1.81 to 2.28)    |
| Timor-Leste | Diet low in milk            | 3<br>(1 to 4)                | 1<br>(0.39 to 1.55)          | 12<br>(5 to 19)              | 1.63<br>(0.61 to 2.53)       | 2.07<br>(1.84 to 2.3)     |
| Timor-Leste | Diet low in fiber           | 0<br>(0 to 1)                | 0.19<br>(0.06 to 0.41)       | 2<br>(1 to 4)                | 0.28<br>(0.1 to 0.62)        | 1.4<br>(1.27 to 1.53)     |
| Timor-Leste | Diet low in calcium         | 5<br>(4 to 8)                | 2.08<br>(1.46 to 2.9)        | 25<br>(16 to 34)             | 3.35<br>(2.12 to 4.58)       | 2.04<br>(1.8 to 2.27)     |
| Timor-Leste | Diet high in red meat       | 0<br>(0 to 1)                | 0.13<br>(0.01 to 0.36)       | 2<br>(0 to 5)                | 0.24<br>(0.02 to 0.67)       | 2.39<br>(2.11 to 2.67)    |
| Timor-Leste | Diet high in processed meat | 0<br>(0 to 0)                | 0.04<br>(0.02 to 0.06)       | 1<br>(0 to 1)                | 0.07<br>(0.04 to 0.11)       | 2.53<br>(2.21 to 2.85)    |
| Timor-Leste | Diet low in whole grains    | 3<br>(1 to 4)                | 1<br>(0.39 to 1.55)          | 12<br>(5 to 19)              | 1.63<br>(0.61 to 2.53)       | 2.07<br>(1.84 to 2.3)     |
| Togo        | All dietary risks           | 32<br>(25 to 40)             | 2.89<br>(2.26 to 3.59)       | 97<br>(67 to 132)            | 3.14<br>(2.2 to 4.16)        | 0.23<br>(0.19 to 0.27)    |
| Togo        | Diet low in milk            | 12<br>(4 to 17)              | 1.1<br>(0.41 to 1.54)        | 36<br>(13 to 54)             | 1.17<br>(0.43 to 1.7)        | 0.15<br>(0.1 to 0.2)      |
| Togo        | Diet low in fiber           | 0<br>(0 to 1)                | 0.03<br>(0.02 to 0.05)       | 1<br>(0 to 1)                | 0.02<br>(0.01 to 0.04)       | -0.63<br>(-0.87 to -0.39) |
| Togo        | Diet low in calcium         | 21<br>(16 to 27)             | 1.93<br>(1.46 to 2.46)       | 64<br>(44 to 88)             | 2.08<br>(1.43 to 2.81)       | 0.2<br>(0.16 to 0.24)     |
| Togo        | Diet high in red meat       | 1<br>(0 to 3)                | 0.09<br>(0.01 to 0.23)       | 3<br>(0 to 9)                | 0.1<br>(0.02 to 0.27)        | 0.48<br>(0.39 to 0.58)    |
| Togo        | Diet high in processed meat | 2<br>(0 to 3)                | 0.14<br>(0.02 to 0.27)       | 6<br>(1 to 12)               | 0.18<br>(0.02 to 0.36)       | 0.83<br>(0.8 to 0.87)     |
| Togo        | Diet low in whole grains    | 12<br>(4 to 17)              | 1.1<br>(0.41 to 1.54)        | 36<br>(13 to 54)             | 1.17<br>(0.43 to 1.7)        | 0.15<br>(0.1 to 0.2)      |
| Tokelau     | All dietary risks           | 0<br>(0 to 0)                | 3.9<br>(2.91 to 4.97)        | 0<br>(0 to 0)                | 4.07<br>(2.84 to 5.45)       | 0.17<br>(0.15 to 0.19)    |
| Tokelau     | Diet low in milk            | 0<br>(0 to 0)                | 1.65<br>(0.61 to 2.3)        | 0<br>(0 to 0)                | 1.78<br>(0.63 to 2.65)       | 0.3<br>(0.27 to 0.34)     |
| Tokelau     | Diet low in fiber           | 0<br>(0 to 0)                | 0.04<br>(0.02 to 0.1)        | 0<br>(0 to 0)                | 0.03<br>(0.02 to 0.06)       | -1.43<br>(-1.49 to -1.37) |

| Countries           | Risk factors                | 1990                         |                              | 2019                         |                              | 1990-2019                 |
|---------------------|-----------------------------|------------------------------|------------------------------|------------------------------|------------------------------|---------------------------|
|                     |                             | Number of deaths<br>(95% UI) | ASDR per 100,000<br>(95% UI) | Number of deaths<br>(95% UI) | ASDR per 100,000<br>(95% UI) | EAPC of ASDR<br>(95% CI)  |
| Tokelau             | Diet low in calcium         | 0<br>(0 to 0)                | 2.41<br>(1.8 to 3.12)        | 0<br>(0 to 0)                | 2.41<br>(1.71 to 3.27)       | 0<br>(-0.01 to 0.01)      |
| Tokelau             | Diet high in red meat       | 0<br>(0 to 0)                | 0.27<br>(0.02 to 0.76)       | 0<br>(0 to 0)                | 0.31<br>(0.03 to 0.84)       | 0.51<br>(0.45 to 0.57)    |
| Tokelau             | Diet high in processed meat | 0<br>(0 to 0)                | 0.08<br>(0.03 to 0.14)       | 0<br>(0 to 0)                | 0.1<br>(0.03 to 0.18)        | 0.74<br>(0.68 to 0.79)    |
| Tokelau             | Diet low in whole grains    | 0<br>(0 to 0)                | 1.65<br>(0.61 to 2.3)        | 0<br>(0 to 0)                | 1.78<br>(0.63 to 2.65)       | 0.3<br>(0.27 to 0.34)     |
| Tonga               | All dietary risks           | 1<br>(1 to 1)                | 2.38<br>(1.83 to 2.94)       | 2<br>(1 to 3)                | 2.64<br>(1.92 to 3.45)       | 0.28<br>(0.15 to 0.41)    |
| Tonga               | Diet low in milk            | 0<br>(0 to 1)                | 1<br>(0.37 to 1.37)          | 1<br>(0 to 1)                | 1.14<br>(0.4 to 1.63)        | 0.36<br>(0.23 to 0.48)    |
| Tonga               | Diet low in fiber           | 0<br>(0 to 0)                | 0.03<br>(0.01 to 0.06)       | 0<br>(0 to 0)                | 0.02<br>(0.01 to 0.04)       | -0.52<br>(-0.64 to -0.39) |
| Tonga               | Diet low in calcium         | 1<br>(1 to 1)                | 1.48<br>(1.13 to 1.88)       | 1<br>(1 to 2)                | 1.6<br>(1.17 to 2.16)        | 0.2<br>(0.07 to 0.33)     |
| Tonga               | Diet high in red meat       | 0<br>(0 to 0)                | 0.16<br>(0.01 to 0.43)       | 0<br>(0 to 0)                | 0.19<br>(0.02 to 0.52)       | 0.37<br>(0.24 to 0.5)     |
| Tonga               | Diet high in processed meat | 0<br>(0 to 0)                | 0.05<br>(0.02 to 0.08)       | 0<br>(0 to 0)                | 0.06<br>(0.02 to 0.11)       | 0.67<br>(0.56 to 0.78)    |
| Tonga               | Diet low in whole grains    | 0<br>(0 to 1)                | 1<br>(0.37 to 1.37)          | 1<br>(0 to 1)                | 1.14<br>(0.4 to 1.63)        | 0.36<br>(0.23 to 0.48)    |
| Trinidad and Tobago | All dietary risks           | 41<br>(29 to 49)             | 5.22<br>(3.79 to 6.28)       | 79<br>(51 to 108)            | 4.39<br>(2.83 to 5.98)       | -0.98<br>(-1.13 to -0.82) |
| Trinidad and Tobago | Diet low in milk            | 21<br>(8 to 27)              | 2.65<br>(1.03 to 3.45)       | 44<br>(17 to 65)             | 2.45<br>(0.95 to 3.58)       | -0.48<br>(-0.61 to -0.35) |
| Trinidad and Tobago | Diet low in fiber           | 4<br>(1 to 7)                | 0.48<br>(0.16 to 0.9)        | 5<br>(2 to 11)               | 0.29<br>(0.1 to 0.63)        | -2.73<br>(-3.05 to -2.41) |
| Trinidad and Tobago | Diet low in calcium         | 18<br>(12 to 25)             | 2.3<br>(1.6 to 3.19)         | 30<br>(17 to 48)             | 1.69<br>(0.97 to 2.63)       | -1.71<br>(-1.95 to -1.48) |
| Trinidad and Tobago | Diet high in red meat       | 2<br>(0 to 6)                | 0.3<br>(0.03 to 0.79)        | 6<br>(1 to 16)               | 0.31<br>(0.03 to 0.88)       | 0.24<br>(0.06 to 0.42)    |
| Trinidad and Tobago | Diet high in processed meat | 1<br>(0 to 3)                | 0.19<br>(0.03 to 0.33)       | 3<br>(1 to 7)                | 0.18<br>(0.03 to 0.35)       | -0.13<br>(-0.24 to -0.01) |
| Trinidad and Tobago | Diet low in whole grains    | 21<br>(8 to 27)              | 2.65<br>(1.03 to 3.45)       | 44<br>(17 to 65)             | 2.45<br>(0.95 to 3.58)       | -0.48<br>(-0.61 to -0.35) |

| Countries    | Risk factors                | 1990                         |                              | 2019                         |                              | 1990-2019                 |
|--------------|-----------------------------|------------------------------|------------------------------|------------------------------|------------------------------|---------------------------|
|              |                             | Number of deaths<br>(95% UI) | ASDR per 100,000<br>(95% UI) | Number of deaths<br>(95% UI) | ASDR per 100,000<br>(95% UI) | EAPC of ASDR<br>(95% CI)  |
| Tunisia      | All dietary risks           | 125<br>(89 to 159)           | 2.82<br>(1.99 to 3.57)       | 352<br>(215 to 498)          | 2.98<br>(1.84 to 4.21)       | 0.02<br>(-0.05 to 0.09)   |
| Tunisia      | Diet low in milk            | 71<br>(32 to 94)             | 1.6<br>(0.73 to 2.11)        | 228<br>(99 to 332)           | 1.92<br>(0.84 to 2.78)       | 0.52<br>(0.45 to 0.59)    |
| Tunisia      | Diet low in fiber           | 2<br>(1 to 5)                | 0.05<br>(0.02 to 0.12)       | 5<br>(2 to 10)               | 0.04<br>(0.02 to 0.09)       | -1.1<br>(-1.3 to -0.9)    |
| Tunisia      | Diet low in calcium         | 55<br>(37 to 77)             | 1.26<br>(0.86 to 1.75)       | 118<br>(64 to 196)           | 1.02<br>(0.56 to 1.67)       | -1.08<br>(-1.19 to -0.97) |
| Tunisia      | Diet high in red meat       | 8<br>(1 to 23)               | 0.18<br>(0.02 to 0.49)       | 25<br>(2 to 72)              | 0.21<br>(0.02 to 0.6)        | 0.36<br>(0.28 to 0.45)    |
| Tunisia      | Diet high in processed meat | 4<br>(1 to 7)                | 0.08<br>(0.02 to 0.14)       | 12<br>(2 to 25)              | 0.1<br>(0.02 to 0.21)        | 0.84<br>(0.76 to 0.93)    |
| Tunisia      | Diet low in whole grains    | 71<br>(32 to 94)             | 1.6<br>(0.73 to 2.11)        | 228<br>(99 to 332)           | 1.92<br>(0.84 to 2.78)       | 0.52<br>(0.45 to 0.59)    |
| Turkey       | All dietary risks           | 1370<br>(898 to 1844)        | 4<br>(2.63 to 5.34)          | 3302<br>(2139 to 4361)       | 3.87<br>(2.51 to 5.1)        | 0.2<br>(-0.22 to 0.62)    |
| Turkey       | Diet low in milk            | 963<br>(473 to 1297)         | 2.8<br>(1.38 to 3.76)        | 2379<br>(1221 to 3237)       | 2.79<br>(1.43 to 3.79)       | 0.27<br>(-0.19 to 0.73)   |
| Turkey       | Diet low in fiber           | 14<br>(9 to 25)              | 0.04<br>(0.03 to 0.07)       | 35<br>(22 to 66)             | 0.04<br>(0.03 to 0.08)       | 0.78<br>(0.39 to 1.17)    |
| Turkey       | Diet low in calcium         | 371<br>(185 to 639)          | 1.1<br>(0.55 to 1.88)        | 796<br>(379 to 1409)         | 0.94<br>(0.45 to 1.66)       | -0.15<br>(-0.43 to 0.13)  |
| Turkey       | Diet high in red meat       | 107<br>(9 to 297)            | 0.31<br>(0.03 to 0.85)       | 256<br>(23 to 711)           | 0.3<br>(0.03 to 0.82)        | 0.21<br>(-0.38 to 0.79)   |
| Turkey       | Diet high in processed meat | 40<br>(10 to 74)             | 0.11<br>(0.03 to 0.21)       | 119<br>(23 to 228)           | 0.14<br>(0.03 to 0.26)       | 1.08<br>(0.47 to 1.69)    |
| Turkey       | Diet low in whole grains    | 963<br>(473 to 1297)         | 2.8<br>(1.38 to 3.76)        | 2379<br>(1221 to 3237)       | 2.79<br>(1.43 to 3.79)       | 0.27<br>(-0.19 to 0.73)   |
| Turkmenistan | All dietary risks           | 56<br>(42 to 67)             | 2.87<br>(2.15 to 3.43)       | 97<br>(69 to 128)            | 2.68<br>(1.93 to 3.54)       | -0.53<br>(-0.93 to -0.12) |
| Turkmenistan | Diet low in milk            | 31<br>(15 to 38)             | 1.57<br>(0.78 to 1.93)       | 54<br>(26 to 73)             | 1.51<br>(0.73 to 2.02)       | -0.36<br>(-0.79 to 0.07)  |

| Countries    | Risk factors                | 1990                         |                              | 2019                         |                              | 1990-2019                 |
|--------------|-----------------------------|------------------------------|------------------------------|------------------------------|------------------------------|---------------------------|
|              |                             | Number of deaths<br>(95% UI) | ASDR per 100,000<br>(95% UI) | Number of deaths<br>(95% UI) | ASDR per 100,000<br>(95% UI) | EAPC of ASDR<br>(95% CI)  |
| Turkmenistan | Diet low in fiber           | 5<br>(2 to 9)                | 0.27<br>(0.1 to 0.48)        | 5<br>(2 to 11)               | 0.15<br>(0.05 to 0.32)       | -2.81<br>(-3.15 to -2.46) |
| Turkmenistan | Diet low in calcium         | 17<br>(10 to 25)             | 0.88<br>(0.55 to 1.3)        | 20<br>(10 to 37)             | 0.58<br>(0.29 to 1.04)       | -2.02<br>(-2.35 to -1.69) |
| Turkmenistan | Diet high in red meat       | 8<br>(1 to 16)               | 0.37<br>(0.07 to 0.78)       | 22<br>(7 to 40)              | 0.59<br>(0.18 to 1.06)       | 2.25<br>(1.47 to 3.04)    |
| Turkmenistan | Diet high in processed meat | 6<br>(1 to 9)                | 0.29<br>(0.05 to 0.47)       | 11<br>(3 to 19)              | 0.29<br>(0.06 to 0.5)        | -0.07<br>(-0.61 to 0.47)  |
| Turkmenistan | Diet low in whole grains    | 31<br>(15 to 38)             | 1.57<br>(0.78 to 1.93)       | 54<br>(26 to 73)             | 1.51<br>(0.73 to 2.02)       | -0.36<br>(-0.79 to 0.07)  |
| Tuvalu       | All dietary risks           | 0<br>(0 to 0)                | 4.06<br>(3.14 to 5.09)       | 0<br>(0 to 1)                | 4.26<br>(3.01 to 5.82)       | 0.02<br>(-0.02 to 0.07)   |
| Tuvalu       | Diet low in milk            | 0<br>(0 to 0)                | 1.69<br>(0.63 to 2.32)       | 0<br>(0 to 0)                | 1.81<br>(0.65 to 2.67)       | 0.08<br>(0.03 to 0.13)    |
| Tuvalu       | Diet low in fiber           | 0<br>(0 to 0)                | 0.06<br>(0.03 to 0.16)       | 0<br>(0 to 0)                | 0.05<br>(0.02 to 0.1)        | -1<br>(-1.13 to -0.86)    |
| Tuvalu       | Diet low in calcium         | 0<br>(0 to 0)                | 2.56<br>(1.95 to 3.25)       | 0<br>(0 to 0)                | 2.62<br>(1.88 to 3.55)       | -0.04<br>(-0.08 to 0)     |
| Tuvalu       | Diet high in red meat       | 0<br>(0 to 0)                | 0.26<br>(0.02 to 0.71)       | 0<br>(0 to 0)                | 0.29<br>(0.02 to 0.82)       | 0.15<br>(0.09 to 0.22)    |
| Tuvalu       | Diet high in processed meat | 0<br>(0 to 0)                | 0.08<br>(0.03 to 0.14)       | 0<br>(0 to 0)                | 0.09<br>(0.03 to 0.18)       | 0.39<br>(0.34 to 0.44)    |
| Tuvalu       | Diet low in whole grains    | 0<br>(0 to 0)                | 1.69<br>(0.63 to 2.32)       | 0<br>(0 to 0)                | 1.81<br>(0.65 to 2.67)       | 0.08<br>(0.03 to 0.13)    |
| Uganda       | All dietary risks           | 144<br>(110 to 178)          | 2.43<br>(1.88 to 3)          | 523<br>(379 to 683)          | 4.03<br>(2.96 to 5.14)       | 1.73<br>(1.52 to 1.94)    |
| Uganda       | Diet low in milk            | 60<br>(23 to 83)             | 1<br>(0.38 to 1.38)          | 214<br>(80 to 305)           | 1.64<br>(0.61 to 2.34)       | 1.67<br>(1.47 to 1.88)    |
| Uganda       | Diet low in fiber           | 1<br>(1 to 2)                | 0.02<br>(0.01 to 0.04)       | 5<br>(3 to 9)                | 0.04<br>(0.02 to 0.08)       | 1.93<br>(1.72 to 2.14)    |
| Uganda       | Diet low in calcium         | 88<br>(66 to 113)            | 1.5<br>(1.14 to 1.91)        | 314<br>(226 to 414)          | 2.45<br>(1.8 to 3.19)        | 1.67<br>(1.45 to 1.88)    |
| Uganda       | Diet high in red meat       | 7<br>(1 to 19)               | 0.12<br>(0.01 to 0.3)        | 31<br>(3 to 86)              | 0.23<br>(0.02 to 0.62)       | 2.38<br>(2.14 to 2.62)    |
| Uganda       | Diet high in processed meat | 6<br>(1 to 11)               | 0.09<br>(0.01 to 0.18)       | 24<br>(3 to 46)              | 0.17<br>(0.03 to 0.33)       | 2.07<br>(1.85 to 2.3)     |

| Countries            | Risk factors                | 1990                         |                              | 2019                         |                              | 1990-2019                 |
|----------------------|-----------------------------|------------------------------|------------------------------|------------------------------|------------------------------|---------------------------|
|                      |                             | Number of deaths<br>(95% UI) | ASDR per 100,000<br>(95% UI) | Number of deaths<br>(95% UI) | ASDR per 100,000<br>(95% UI) | EAPC of ASDR<br>(95% CI)  |
| Uganda               | Diet low in whole grains    | 60<br>(23 to 83)             | 1<br>(0.38 to 1.38)          | 214<br>(80 to 305)           | 1.64<br>(0.61 to 2.34)       | 1.67<br>(1.47 to 1.88)    |
| Ukraine              | All dietary risks           | 4983<br>(3551 to 6145)       | 6.99<br>(4.97 to 8.63)       | 4361<br>(2921 to 5696)       | 5.73<br>(3.86 to 7.48)       | -1.64<br>(-2.01 to -1.27) |
| Ukraine              | Diet low in milk            | 3279<br>(1633 to 4028)       | 4.59<br>(2.28 to 5.64)       | 2584<br>(992 to 3509)        | 3.39<br>(1.31 to 4.62)       | -2.01<br>(-2.39 to -1.64) |
| Ukraine              | Diet low in fiber           | 138<br>(51 to 348)           | 0.2<br>(0.07 to 0.5)         | 170<br>(59 to 412)           | 0.22<br>(0.08 to 0.55)       | -1.16<br>(-1.81 to -0.5)  |
| Ukraine              | Diet low in calcium         | 1159<br>(575 to 2058)        | 1.63<br>(0.81 to 2.89)       | 1191<br>(618 to 2017)        | 1.55<br>(0.8 to 2.65)        | -1.45<br>(-1.95 to -0.95) |
| Ukraine              | Diet high in red meat       | 620<br>(81 to 1464)          | 0.87<br>(0.12 to 2.06)       | 477<br>(46 to 1302)          | 0.63<br>(0.06 to 1.72)       | -1.69<br>(-2.17 to -1.2)  |
| Ukraine              | Diet high in processed meat | 360<br>(42 to 626)           | 0.51<br>(0.06 to 0.88)       | 434<br>(52 to 755)           | 0.58<br>(0.07 to 1)          | 0.17<br>(-0.18 to 0.52)   |
| Ukraine              | Diet low in whole grains    | 3279<br>(1633 to 4028)       | 4.59<br>(2.28 to 5.64)       | 2584<br>(992 to 3509)        | 3.39<br>(1.31 to 4.62)       | -2.01<br>(-2.39 to -1.64) |
| United Arab Emirates | All dietary risks           | 16<br>(9 to 24)              | 5.29<br>(3.06 to 7.77)       | 128<br>(73 to 188)           | 5.11<br>(2.87 to 7.71)       | -0.14<br>(-0.52 to 0.23)  |
| United Arab Emirates | Diet low in milk            | 10<br>(4 to 15)              | 3.31<br>(1.33 to 4.98)       | 79<br>(28 to 121)            | 3.08<br>(1.06 to 4.73)       | -0.34<br>(-0.75 to 0.07)  |
| United Arab Emirates | Diet low in fiber           | 0<br>(0 to 1)                | 0.12<br>(0.04 to 0.31)       | 3<br>(1 to 8)                | 0.15<br>(0.05 to 0.35)       | 0.91<br>(0.72 to 1.11)    |
| United Arab Emirates | Diet low in calcium         | 3<br>(1 to 6)                | 1.17<br>(0.51 to 2.18)       | 38<br>(18 to 69)             | 1.7<br>(0.84 to 3.06)        | 1.39<br>(0.99 to 1.8)     |
| United Arab Emirates | Diet high in red meat       | 3<br>(1 to 7)                | 0.9<br>(0.17 to 2.18)        | 14<br>(1 to 40)              | 0.5<br>(0.04 to 1.49)        | -2.11<br>(-2.32 to -1.89) |
| United Arab Emirates | Diet high in processed meat | 1<br>(0 to 2)                | 0.32<br>(0.04 to 0.66)       | 7<br>(1 to 14)               | 0.23<br>(0.03 to 0.49)       | -1.46<br>(-1.98 to -0.94) |
| United Arab Emirates | Diet low in whole grains    | 10<br>(4 to 15)              | 3.31<br>(1.33 to 4.98)       | 79<br>(28 to 121)            | 3.08<br>(1.06 to 4.73)       | -0.34<br>(-0.75 to 0.07)  |
| United Kingdom       | All dietary risks           | 7388<br>(5345 to 9035)       | 8.03<br>(5.82 to 9.83)       | 7470<br>(5153 to 9213)       | 5.58<br>(3.91 to 6.87)       | -1.47<br>(-1.65 to -1.28) |
| United Kingdom       | Diet low in milk            | 3781<br>(1420 to 4869)       | 4.11<br>(1.54 to 5.28)       | 4056<br>(1520 to 5244)       | 3.03<br>(1.13 to 3.91)       | -1.28<br>(-1.42 to -1.15) |

| Countries                   | Risk factors                | 1990                         |                              | 2019                         |                              | 1990-2019                 |
|-----------------------------|-----------------------------|------------------------------|------------------------------|------------------------------|------------------------------|---------------------------|
|                             |                             | Number of deaths<br>(95% UI) | ASDR per 100,000<br>(95% UI) | Number of deaths<br>(95% UI) | ASDR per 100,000<br>(95% UI) | EAPC of ASDR<br>(95% CI)  |
| United Kingdom              | Diet low in fiber           | 623<br>(244 to 1142)         | 0.67<br>(0.27 to 1.23)       | 549<br>(216 to 1082)         | 0.4<br>(0.16 to 0.8)         | -1.89<br>(-2.24 to -1.54) |
| United Kingdom              | Diet low in calcium         | 1448<br>(707 to 2583)        | 1.55<br>(0.75 to 2.78)       | 1180<br>(544 to 2069)        | 0.85<br>(0.4 to 1.5)         | -2.18<br>(-2.6 to -1.76)  |
| United Kingdom              | Diet high in red meat       | 1193<br>(297 to 2369)        | 1.32<br>(0.33 to 2.6)        | 1059<br>(221 to 2248)        | 0.81<br>(0.18 to 1.7)        | -1.96<br>(-2.22 to -1.69) |
| United Kingdom              | Diet high in processed meat | 1415<br>(504 to 2197)        | 1.55<br>(0.55 to 2.41)       | 1591<br>(560 to 2518)        | 1.21<br>(0.44 to 1.91)       | -1.08<br>(-1.18 to -0.97) |
| United Kingdom              | Diet low in whole grains    | 3781<br>(1420 to 4869)       | 4.11<br>(1.54 to 5.28)       | 4056<br>(1520 to 5244)       | 3.03<br>(1.13 to 3.91)       | -1.28<br>(-1.42 to -1.15) |
| United Republic of Tanzania | All dietary risks           | 291<br>(221 to 371)          | 2.93<br>(2.25 to 3.67)       | 778<br>(561 to 1037)         | 3.43<br>(2.53 to 4.47)       | 0.57<br>(0.51 to 0.63)    |
| United Republic of Tanzania | Diet low in milk            | 93<br>(35 to 140)            | 0.93<br>(0.35 to 1.41)       | 278<br>(102 to 430)          | 1.21<br>(0.45 to 1.84)       | 0.98<br>(0.93 to 1.02)    |
| United Republic of Tanzania | Diet low in fiber           | 4<br>(2 to 9)                | 0.04<br>(0.02 to 0.1)        | 9<br>(5 to 18)               | 0.04<br>(0.02 to 0.08)       | -0.25<br>(-0.39 to -0.11) |
| United Republic of Tanzania | Diet low in calcium         | 202<br>(151 to 265)          | 2.04<br>(1.54 to 2.64)       | 512<br>(377 to 685)          | 2.27<br>(1.7 to 2.98)        | 0.38<br>(0.32 to 0.43)    |
| United Republic of Tanzania | Diet high in red meat       | 15<br>(2 to 40)              | 0.15<br>(0.02 to 0.39)       | 39<br>(4 to 103)             | 0.17<br>(0.02 to 0.44)       | 0.47<br>(0.25 to 0.69)    |
| United Republic of Tanzania | Diet high in processed meat | 13<br>(2 to 24)              | 0.12<br>(0.02 to 0.23)       | 35<br>(5 to 69)              | 0.15<br>(0.02 to 0.29)       | 0.85<br>(0.69 to 1.01)    |
| United Republic of Tanzania | Diet low in whole grains    | 93<br>(35 to 140)            | 0.93<br>(0.35 to 1.41)       | 278<br>(102 to 430)          | 1.21<br>(0.45 to 1.84)       | 0.98<br>(0.93 to 1.02)    |
| United States of America    | All dietary risks           | 21198<br>(15512 to 26161)    | 6.48<br>(4.75 to 7.98)       | 26824<br>(19397 to 33359)    | 4.72<br>(3.46 to 5.84)       | -1.26<br>(-1.36 to -1.16) |
| United States of America    | Diet low in milk            | 10015<br>(3764 to 13318)     | 3.06<br>(1.15 to 4.07)       | 13049<br>(4889 to 17133)     | 2.29<br>(0.86 to 3.02)       | -1.23<br>(-1.33 to -1.13) |
| United States of America    | Diet low in fiber           | 2016<br>(787 to 3663)        | 0.61<br>(0.24 to 1.11)       | 1760<br>(673 to 3441)        | 0.3<br>(0.12 to 0.59)        | -2.47<br>(-2.63 to -2.31) |
| United States of America    | Diet low in calcium         | 3924<br>(2017 to 6719)       | 1.18<br>(0.6 to 2.02)        | 4338<br>(2122 to 7529)       | 0.74<br>(0.36 to 1.28)       | -1.35<br>(-1.65 to -1.05) |
| United States of America    | Diet high in red meat       | 4392<br>(1231 to 7939)       | 1.37<br>(0.39 to 2.45)       | 5738<br>(1601 to 10372)      | 1.03<br>(0.29 to 1.84)       | -1.2<br>(-1.32 to -1.08)  |



| Countries                    | Risk factors                | 1990                         |                              | 2019                         |                              | 1990-2019                 |
|------------------------------|-----------------------------|------------------------------|------------------------------|------------------------------|------------------------------|---------------------------|
|                              |                             | Number of deaths<br>(95% UI) | ASDR per 100,000<br>(95% UI) | Number of deaths<br>(95% UI) | ASDR per 100,000<br>(95% UI) | EAPC of ASDR<br>(95% CI)  |
| United States of America     | Diet high in processed meat | 3973<br>(1348 to 6029)       | 1.22<br>(0.42 to 1.86)       | 5751<br>(2074 to 9197)       | 1.03<br>(0.38 to 1.64)       | -0.83<br>(-0.93 to -0.74) |
| United States of America     | Diet low in whole grains    | 10015<br>(3764 to 13318)     | 3.06<br>(1.15 to 4.07)       | 13049<br>(4889 to 17133)     | 2.29<br>(0.86 to 3.02)       | -1.23<br>(-1.33 to -1.13) |
| United States Virgin Islands | All dietary risks           | 5<br>(3 to 6)                | 6.35<br>(4.4 to 8.04)        | 14<br>(9 to 18)              | 7.64<br>(4.88 to 10)         | 0.93<br>(0.75 to 1.1)     |
| United States Virgin Islands | Diet low in milk            | 2<br>(1 to 3)                | 3.26<br>(1.22 to 4.39)       | 8<br>(3 to 11)               | 4.36<br>(1.6 to 5.95)        | 1.3<br>(1.09 to 1.51)     |
| United States Virgin Islands | Diet low in fiber           | 0<br>(0 to 1)                | 0.46<br>(0.17 to 0.91)       | 1<br>(0 to 1)                | 0.37<br>(0.14 to 0.84)       | -0.72<br>(-1.04 to -0.39) |
| United States Virgin Islands | Diet low in calcium         | 2<br>(1 to 3)                | 2.69<br>(1.73 to 3.89)       | 5<br>(3 to 8)                | 2.65<br>(1.47 to 4.27)       | 0.15<br>(-0.05 to 0.36)   |
| United States Virgin Islands | Diet high in red meat       | 0<br>(0 to 1)                | 0.5<br>(0.05 to 1.36)        | 1<br>(0 to 4)                | 0.72<br>(0.07 to 1.94)       | 1.64<br>(1.37 to 1.91)    |
| United States Virgin Islands | Diet high in processed meat | 0<br>(0 to 0)                | 0.23<br>(0.04 to 0.44)       | 1<br>(0 to 1)                | 0.34<br>(0.06 to 0.64)       | 1.67<br>(1.41 to 1.94)    |
| United States Virgin Islands | Diet low in whole grains    | 2<br>(1 to 3)                | 3.26<br>(1.22 to 4.39)       | 8<br>(3 to 11)               | 4.36<br>(1.6 to 5.95)        | 1.3<br>(1.09 to 1.51)     |
| Uruguay                      | All dietary risks           | 424<br>(323 to 503)          | 10.91<br>(8.31 to 12.95)     | 535<br>(380 to 659)          | 9.19<br>(6.57 to 11.28)      | -0.7<br>(-0.77 to -0.63)  |
| Uruguay                      | Diet low in milk            | 190<br>(72 to 244)           | 4.9<br>(1.87 to 6.31)        | 275<br>(106 to 357)          | 4.72<br>(1.81 to 6.13)       | -0.19<br>(-0.27 to -0.1)  |
| Uruguay                      | Diet low in fiber           | 42<br>(16 to 73)             | 1.08<br>(0.41 to 1.88)       | 31<br>(11 to 65)             | 0.51<br>(0.18 to 1.08)       | -2.77<br>(-2.88 to -2.66) |
| Uruguay                      | Diet low in calcium         | 116<br>(68 to 180)           | 2.98<br>(1.75 to 4.63)       | 108<br>(54 to 188)           | 1.81<br>(0.9 to 3.15)        | -1.72<br>(-1.84 to -1.6)  |
| Uruguay                      | Diet high in red meat       | 113<br>(45 to 175)           | 2.9<br>(1.16 to 4.49)        | 133<br>(44 to 225)           | 2.34<br>(0.78 to 3.89)       | -1.09<br>(-1.25 to -0.92) |
| Uruguay                      | Diet high in processed meat | 45<br>(9 to 72)              | 1.16<br>(0.23 to 1.87)       | 72<br>(15 to 115)            | 1.25<br>(0.27 to 1.98)       | 0.23<br>(0.16 to 0.29)    |
| Uruguay                      | Diet low in whole grains    | 190<br>(72 to 244)           | 4.9<br>(1.87 to 6.31)        | 275<br>(106 to 357)          | 4.72<br>(1.81 to 6.13)       | -0.19<br>(-0.27 to -0.1)  |
| Uzbekistan                   | All dietary risks           | 297<br>(219 to 359)          | 2.59<br>(1.9 to 3.13)        | 565<br>(398 to 715)          | 3.63<br>(2.6 to 4.59)        | 1.24<br>(1.09 to 1.39)    |

| Countries                             | Risk factors                | 1990                         |                              | 2019                         |                              | 1990-2019                 |
|---------------------------------------|-----------------------------|------------------------------|------------------------------|------------------------------|------------------------------|---------------------------|
|                                       |                             | Number of deaths<br>(95% UI) | ASDR per 100,000<br>(95% UI) | Number of deaths<br>(95% UI) | ASDR per 100,000<br>(95% UI) | EAPC of ASDR<br>(95% CI)  |
| Uzbekistan                            | Diet low in milk            | 171<br>(84 to 212)           | 1.49<br>(0.73 to 1.85)       | 344<br>(165 to 449)          | 2.21<br>(1.06 to 2.84)       | 1.53<br>(1.41 to 1.65)    |
| Uzbekistan                            | Diet low in fiber           | 25<br>(9 to 47)              | 0.21<br>(0.07 to 0.41)       | 22<br>(7 to 51)              | 0.17<br>(0.06 to 0.38)       | -1.23<br>(-1.74 to -0.73) |
| Uzbekistan                            | Diet low in calcium         | 89<br>(53 to 135)            | 0.79<br>(0.46 to 1.18)       | 143<br>(75 to 239)           | 0.99<br>(0.54 to 1.6)        | 0.74<br>(0.33 to 1.16)    |
| Uzbekistan                            | Diet high in red meat       | 29<br>(3 to 71)              | 0.25<br>(0.02 to 0.61)       | 73<br>(12 to 169)            | 0.41<br>(0.06 to 0.98)       | 1.98<br>(1.71 to 2.25)    |
| Uzbekistan                            | Diet high in processed meat | 31<br>(5 to 51)              | 0.26<br>(0.04 to 0.43)       | 62<br>(12 to 107)            | 0.35<br>(0.06 to 0.62)       | 1.15<br>(0.95 to 1.36)    |
| Uzbekistan                            | Diet low in whole grains    | 171<br>(84 to 212)           | 1.49<br>(0.73 to 1.85)       | 344<br>(165 to 449)          | 2.21<br>(1.06 to 2.84)       | 1.53<br>(1.41 to 1.65)    |
| Vanuatu                               | All dietary risks           | 2<br>(1 to 3)                | 3.19<br>(2.27 to 4.21)       | 6<br>(4 to 8)                | 3.76<br>(2.7 to 5.01)        | 0.39<br>(0.25 to 0.54)    |
| Vanuatu                               | Diet low in milk            | 1<br>(0 to 1)                | 1.28<br>(0.47 to 1.83)       | 2<br>(1 to 3)                | 1.53<br>(0.54 to 2.19)       | 0.47<br>(0.33 to 0.61)    |
| Vanuatu                               | Diet low in fiber           | 0<br>(0 to 0)                | 0.03<br>(0.01 to 0.06)       | 0<br>(0 to 0)                | 0.03<br>(0.02 to 0.05)       | -0.7<br>(-0.87 to -0.52)  |
| Vanuatu                               | Diet low in calcium         | 1<br>(1 to 2)                | 2.02<br>(1.43 to 2.75)       | 4<br>(3 to 5)                | 2.36<br>(1.71 to 3.17)       | 0.34<br>(0.2 to 0.49)     |
| Vanuatu                               | Diet high in red meat       | 0<br>(0 to 0)                | 0.29<br>(0.03 to 0.73)       | 1<br>(0 to 1)                | 0.32<br>(0.03 to 0.87)       | 0.16<br>(-0.03 to 0.35)   |
| Vanuatu                               | Diet high in processed meat | 0<br>(0 to 0)                | 0.06<br>(0.02 to 0.1)        | 0<br>(0 to 0)                | 0.08<br>(0.02 to 0.14)       | 0.85<br>(0.72 to 0.98)    |
| Vanuatu                               | Diet low in whole grains    | 1<br>(0 to 1)                | 1.28<br>(0.47 to 1.83)       | 2<br>(1 to 3)                | 1.53<br>(0.54 to 2.19)       | 0.47<br>(0.33 to 0.61)    |
| Venezuela<br>(Bolivarian Republic of) | All dietary risks           | 276<br>(215 to 329)          | 3.01<br>(2.35 to 3.59)       | 1094<br>(751 to 1501)        | 3.88<br>(2.69 to 5.29)       | 0.38<br>(0.19 to 0.56)    |
| Venezuela<br>(Bolivarian Republic of) | Diet low in milk            | 111<br>(42 to 151)           | 1.21<br>(0.46 to 1.64)       | 436<br>(161 to 636)          | 1.54<br>(0.57 to 2.25)       | 0.49<br>(0.35 to 0.63)    |
| Venezuela<br>(Bolivarian Republic of) | Diet low in fiber           | 21<br>(7 to 42)              | 0.23<br>(0.08 to 0.46)       | 92<br>(31 to 186)            | 0.33<br>(0.11 to 0.66)       | 0.53<br>(0.26 to 0.8)     |

| Countries                             | Risk factors                | 1990                         |                              | 2019                         |                              | 1990-2019                |
|---------------------------------------|-----------------------------|------------------------------|------------------------------|------------------------------|------------------------------|--------------------------|
|                                       |                             | Number of deaths<br>(95% UI) | ASDR per 100,000<br>(95% UI) | Number of deaths<br>(95% UI) | ASDR per 100,000<br>(95% UI) | EAPC of ASDR<br>(95% CI) |
| Venezuela<br>(Bolivarian Republic of) | Diet low in calcium         | 148<br>(112 to 189)          | 1.63<br>(1.24 to 2.08)       | 571<br>(383 to 806)          | 2.04<br>(1.37 to 2.87)       | 0.07<br>(-0.19 to 0.33)  |
| Venezuela<br>(Bolivarian Republic of) | Diet high in red meat       | 23<br>(2 to 63)              | 0.25<br>(0.02 to 0.68)       | 99<br>(9 to 277)             | 0.35<br>(0.03 to 0.96)       | 1.02<br>(0.9 to 1.13)    |
| Venezuela<br>(Bolivarian Republic of) | Diet high in processed meat | 11<br>(2 to 19)              | 0.12<br>(0.02 to 0.2)        | 49<br>(7 to 98)              | 0.17<br>(0.02 to 0.34)       | 1.26<br>(1.11 to 1.41)   |
| Venezuela<br>(Bolivarian Republic of) | Diet low in whole grains    | 111<br>(42 to 151)           | 1.21<br>(0.46 to 1.64)       | 436<br>(161 to 636)          | 1.54<br>(0.57 to 2.25)       | 0.49<br>(0.35 to 0.63)   |
| Viet Nam                              | All dietary risks           | 1542<br>(1185 to 1918)       | 3.99<br>(3.07 to 4.94)       | 6417<br>(4724 to 8209)       | 7.22<br>(5.37 to 9.13)       | 2.33<br>(2.21 to 2.45)   |
| Viet Nam                              | Diet low in milk            | 431<br>(163 to 645)          | 1.11<br>(0.42 to 1.66)       | 1897<br>(711 to 2902)        | 2.12<br>(0.79 to 3.24)       | 2.55<br>(2.43 to 2.67)   |
| Viet Nam                              | Diet low in fiber           | 312<br>(174 to 447)          | 0.81<br>(0.45 to 1.15)       | 1020<br>(507 to 1561)        | 1.16<br>(0.59 to 1.77)       | 1.38<br>(1.25 to 1.5)    |
| Viet Nam                              | Diet low in calcium         | 989<br>(728 to 1279)         | 2.56<br>(1.89 to 3.33)       | 3954<br>(2901 to 5083)       | 4.47<br>(3.29 to 5.71)       | 2.18<br>(2.06 to 2.29)   |
| Viet Nam                              | Diet high in red meat       | 77<br>(7 to 209)             | 0.2<br>(0.02 to 0.54)        | 564<br>(60 to 1418)          | 0.61<br>(0.06 to 1.54)       | 4.5<br>(4.27 to 4.73)    |
| Viet Nam                              | Diet high in processed meat | 11<br>(8 to 13)              | 0.03<br>(0.02 to 0.03)       | 65<br>(45 to 90)             | 0.07<br>(0.05 to 0.1)        | 3.7<br>(3.51 to 3.89)    |
| Viet Nam                              | Diet low in whole grains    | 431<br>(163 to 645)          | 1.11<br>(0.42 to 1.66)       | 1897<br>(711 to 2902)        | 2.12<br>(0.79 to 3.24)       | 2.55<br>(2.43 to 2.67)   |
| Yemen                                 | All dietary risks           | 109<br>(69 to 163)           | 2.41<br>(1.52 to 3.63)       | 368<br>(263 to 512)          | 2.97<br>(2.12 to 4.11)       | 0.99<br>(0.88 to 1.1)    |
| Yemen                                 | Diet low in milk            | 52<br>(26 to 82)             | 1.16<br>(0.58 to 1.78)       | 177<br>(83 to 257)           | 1.42<br>(0.69 to 2.04)       | 1.05<br>(0.92 to 1.18)   |
| Yemen                                 | Diet low in fiber           | 6<br>(2 to 14)               | 0.14<br>(0.04 to 0.32)       | 25<br>(9 to 48)              | 0.2<br>(0.07 to 0.38)        | 0.79<br>(0.61 to 0.97)   |
| Yemen                                 | Diet low in calcium         | 62<br>(38 to 95)             | 1.38<br>(0.85 to 2.11)       | 210<br>(147 to 299)          | 1.7<br>(1.19 to 2.39)        | 0.93<br>(0.82 to 1.03)   |
| Yemen                                 | Diet high in red meat       | 4<br>(0 to 12)               | 0.09<br>(0.01 to 0.26)       | 15<br>(2 to 42)              | 0.12<br>(0.01 to 0.32)       | 1.46<br>(1.24 to 1.67)   |

| Countries | Risk factors                | 1990                         |                              | 2019                         |                              | 1990-2019                |
|-----------|-----------------------------|------------------------------|------------------------------|------------------------------|------------------------------|--------------------------|
|           |                             | Number of deaths<br>(95% UI) | ASDR per 100,000<br>(95% UI) | Number of deaths<br>(95% UI) | ASDR per 100,000<br>(95% UI) | EAPC of ASDR<br>(95% CI) |
| Yemen     | Diet high in processed meat | 2<br>(1 to 4)                | 0.04<br>(0.01 to 0.08)       | 6<br>(2 to 12)               | 0.05<br>(0.02 to 0.09)       | 1.16<br>(0.99 to 1.32)   |
| Yemen     | Diet low in whole grains    | 52<br>(26 to 82)             | 1.16<br>(0.58 to 1.78)       | 177<br>(83 to 257)           | 1.42<br>(0.69 to 2.04)       | 1.05<br>(0.92 to 1.18)   |
| Zambia    | All dietary risks           | 107<br>(77 to 144)           | 4.1<br>(2.97 to 5.47)        | 312<br>(221 to 423)          | 5.02<br>(3.57 to 6.69)       | 0.64<br>(0.61 to 0.67)   |
| Zambia    | Diet low in milk            | 32<br>(12 to 51)             | 1.22<br>(0.45 to 1.96)       | 102<br>(37 to 157)           | 1.63<br>(0.61 to 2.53)       | 0.95<br>(0.89 to 1.01)   |
| Zambia    | Diet low in fiber           | 1<br>(1 to 3)                | 0.05<br>(0.02 to 0.11)       | 4<br>(2 to 9)                | 0.06<br>(0.03 to 0.15)       | 0.97<br>(0.47 to 1.46)   |
| Zambia    | Diet low in calcium         | 78<br>(54 to 109)            | 2.98<br>(2.07 to 4.1)        | 219<br>(150 to 304)          | 3.54<br>(2.48 to 4.86)       | 0.52<br>(0.49 to 0.55)   |
| Zambia    | Diet high in red meat       | 5<br>(1 to 15)               | 0.2<br>(0.02 to 0.56)        | 16<br>(1 to 46)              | 0.25<br>(0.02 to 0.7)        | 0.69<br>(0.61 to 0.77)   |
| Zambia    | Diet high in processed meat | 4<br>(1 to 8)                | 0.15<br>(0.02 to 0.3)        | 12<br>(2 to 25)              | 0.18<br>(0.03 to 0.37)       | 0.64<br>(0.54 to 0.73)   |
| Zambia    | Diet low in whole grains    | 32<br>(12 to 51)             | 1.22<br>(0.45 to 1.96)       | 102<br>(37 to 157)           | 1.63<br>(0.61 to 2.53)       | 0.95<br>(0.89 to 1.01)   |
| Zimbabwe  | All dietary risks           | 142<br>(114 to 172)          | 3.95<br>(3.2 to 4.81)        | 322<br>(231 to 425)          | 5.12<br>(3.72 to 6.7)        | 0.92<br>(0.69 to 1.16)   |
| Zimbabwe  | Diet low in milk            | 49<br>(18 to 70)             | 1.36<br>(0.5 to 1.96)        | 111<br>(39 to 170)           | 1.75<br>(0.62 to 2.69)       | 0.9<br>(0.67 to 1.14)    |
| Zimbabwe  | Diet low in fiber           | 3<br>(1 to 7)                | 0.09<br>(0.03 to 0.21)       | 5<br>(2 to 13)               | 0.09<br>(0.04 to 0.23)       | -0.21<br>(-0.49 to 0.07) |
| Zimbabwe  | Diet low in calcium         | 98<br>(76 to 123)            | 2.73<br>(2.12 to 3.42)       | 222<br>(154 to 296)          | 3.54<br>(2.48 to 4.71)       | 0.93<br>(0.71 to 1.16)   |
| Zimbabwe  | Diet high in red meat       | 7<br>(1 to 18)               | 0.19<br>(0.02 to 0.49)       | 17<br>(2 to 47)              | 0.26<br>(0.03 to 0.72)       | 1.19<br>(0.9 to 1.48)    |
| Zimbabwe  | Diet high in processed meat | 4<br>(1 to 8)                | 0.11<br>(0.02 to 0.2)        | 9<br>(2 to 18)               | 0.14<br>(0.03 to 0.28)       | 1.14<br>(0.91 to 1.37)   |
| Zimbabwe  | Diet low in whole grains    | 49<br>(18 to 70)             | 1.36<br>(0.5 to 1.96)        | 111<br>(39 to 170)           | 1.75<br>(0.62 to 2.69)       | 0.9<br>(0.67 to 1.14)    |

**Abbreviations:** ASDR, age-standardized death rate; EAPC, estimated annual percentage change; UI, uncertainty interval; CI, confidence

**Supplementary Table S5.** The death cases and age-standardized death rates of CRC attributable to diet low in whole grains in 1990 and 2019, and their temporal trends from 1990 to 2019.

| Characteristics                | 1990                         |                                 | 2019                            |                                 | 1990-2019                   |
|--------------------------------|------------------------------|---------------------------------|---------------------------------|---------------------------------|-----------------------------|
|                                | Number of deaths<br>(95% UI) | ASDR per<br>100,000<br>(95% UI) | Number of<br>deaths<br>(95% UI) | ASDR per<br>100,000<br>(95% UI) | EAPC of<br>ASDR<br>(95% CI) |
| <b>Global</b>                  | 83524<br>(33128 to 108898)   | 2.31<br>(0.92 to 3)             | 171487<br>(66721 to 225162)     | 2.16<br>(0.84 to 2.84)          | -0.29<br>(-0.36 to -0.23)   |
| <b>Socio-demographic index</b> |                              |                                 |                                 |                                 |                             |
| High SDI                       | 33880<br>(12820 to 44760)    | 3.23<br>(1.22 to 4.26)          | 51307<br>(19330 to 67630)       | 2.55<br>(0.96 to 3.35)          | -0.97<br>(-1.05 to -0.89)   |
| High-middle SDI                | 29559<br>(12447 to 37444)    | 2.93<br>(1.23 to 3.7)           | 55270<br>(21849 to 72006)       | 2.75<br>(1.09 to 3.58)          | -0.34<br>(-0.43 to -0.25)   |
| Middle SDI                     | 12506<br>(4820 to 16724)     | 1.32<br>(0.51 to 1.77)          | 42038<br>(16054 to 56386)       | 1.8<br>(0.69 to 2.41)           | 1.24<br>(1.1 to 1.39)       |
| Low-middle SDI                 | 5392<br>(2145 to 7140)       | 0.99<br>(0.39 to 1.31)          | 17246<br>(6672 to 22951)        | 1.34<br>(0.52 to 1.79)          | 1.08<br>(1.04 to 1.12)      |
| Low SDI                        | 2143<br>(871 to 2938)        | 1<br>(0.41 to 1.36)             | 5528<br>(2195 to 7384)          | 1.17<br>(0.46 to 1.56)          | 0.56<br>(0.51 to 0.6)       |
| <b>Region</b>                  |                              |                                 |                                 |                                 |                             |
| Andean Latin America           | 239<br>(91 to 314)           | 1.24<br>(0.47 to 1.63)          | 849<br>(311 to 1207)            | 1.56<br>(0.57 to 2.22)          | 0.99<br>(0.85 to 1.12)      |
| Australasia                    | 828<br>(312 to 1110)         | 3.58<br>(1.35 to 4.81)          | 1284<br>(478 to 1718)           | 2.49<br>(0.93 to 3.31)          | -1.59<br>(-1.72 to -1.47)   |
| Caribbean                      | 537<br>(203 to 696)          | 2.15<br>(0.81 to 2.79)          | 1262<br>(474 to 1730)           | 2.44<br>(0.92 to 3.34)          | 0.46<br>(0.4 to 0.52)       |
| Central Asia                   | 1084<br>(537 to 1330)        | 2.33<br>(1.16 to 2.86)          | 1594<br>(786 to 1992)           | 2.4<br>(1.19 to 3.01)           | 0.36<br>(0.19 to 0.53)      |
| Central Europe                 | 5238<br>(2043 to 6717)       | 3.66<br>(1.43 to 4.7)           | 8363<br>(3077 to 11205)         | 3.82<br>(1.41 to 5.12)          | 0.14<br>(0.05 to 0.22)      |
| Central Latin America          | 776<br>(292 to 1044)         | 1<br>(0.38 to 1.34)             | 3053<br>(1126 to 4242)          | 1.32<br>(0.49 to 1.83)          | 0.95<br>(0.91 to 0.99)      |
| Central Sub-Saharan Africa     | 218<br>(83 to 317)           | 1.09<br>(0.41 to 1.58)          | 525<br>(188 to 772)             | 1.11<br>(0.39 to 1.66)          | -0.05<br>(-0.26 to 0.16)    |
| East Asia                      | 12911<br>(4832 to 17333)     | 1.6<br>(0.6 to 2.15)            | 43889<br>(16196 to 60896)       | 2.24<br>(0.83 to 3.09)          | 1.47<br>(1.22 to 1.72)      |
| Eastern Europe                 | 9548<br>(4160 to 11961)      | 3.45<br>(1.5 to 4.31)           | 10871<br>(4121 to 14232)        | 3.13<br>(1.19 to 4.1)           | -0.8<br>(-1 to -0.6)        |
| Eastern Sub-Saharan Africa     | 722<br>(277 to 1001)         | 1.04<br>(0.4 to 1.43)           | 1860<br>(678 to 2622)           | 1.24<br>(0.46 to 1.74)          | 0.66<br>(0.6 to 0.73)       |

|                              |                          |                        |                           |                        |                           |
|------------------------------|--------------------------|------------------------|---------------------------|------------------------|---------------------------|
| High-income Asia Pacific     | 4617<br>(1724 to 6391)   | 2.42<br>(0.91 to 3.34) | 11244<br>(4217 to 15105)  | 2.24<br>(0.84 to 2.99) | -0.33<br>(-0.42 to -0.24) |
| High-income North America    | 10993<br>(4134 to 14609) | 3.06<br>(1.15 to 4.06) | 14816<br>(5557 to 19542)  | 2.31<br>(0.87 to 3.05) | -1.17<br>(-1.27 to -1.08) |
| North Africa and Middle East | 2617<br>(1225 to 3420)   | 1.66<br>(0.79 to 2.16) | 7822<br>(3657 to 10100)   | 1.98<br>(0.92 to 2.54) | 0.8<br>(0.6 to 1)         |
| Oceania                      | 34<br>(13 to 47)         | 1.3<br>(0.5 to 1.77)   | 92<br>(35 to 129)         | 1.48<br>(0.55 to 2.04) | 0.41<br>(0.33 to 0.49)    |
| South Asia                   | 4011<br>(1589 to 5431)   | 0.8<br>(0.32 to 1.08)  | 13845<br>(5413 to 18842)  | 1.07<br>(0.42 to 1.45) | 0.84<br>(0.72 to 0.96)    |
| Southeast Asia               | 3056<br>(1160 to 4288)   | 1.28<br>(0.49 to 1.78) | 10359<br>(3942 to 15324)  | 1.82<br>(0.69 to 2.69) | 1.13<br>(1.07 to 1.2)     |
| Southern Latin America       | 1689<br>(711 to 2141)    | 3.82<br>(1.6 to 4.85)  | 3089<br>(1147 to 3994)    | 3.65<br>(1.36 to 4.72) | -0.18<br>(-0.26 to -0.1)  |
| Southern Sub-Saharan Africa  | 317<br>(120 to 470)      | 1.25<br>(0.47 to 1.87) | 752<br>(276 to 1076)      | 1.45<br>(0.54 to 2.09) | 0.53<br>(0.32 to 0.75)    |
| Tropical Latin America       | 1277<br>(476 to 1683)    | 1.53<br>(0.57 to 2.01) | 3969<br>(1479 to 5328)    | 1.67<br>(0.62 to 2.25) | 0.37<br>(0.23 to 0.52)    |
| Western Europe               | 21986<br>(8795 to 28247) | 3.74<br>(1.49 to 4.8)  | 29831<br>(12051 to 38310) | 2.99<br>(1.2 to 3.83)  | -0.97<br>(-1.13 to -0.82) |
| Western Sub-Saharan Africa   | 827<br>(322 to 1164)     | 1.06<br>(0.41 to 1.49) | 2119<br>(801 to 2911)     | 1.3<br>(0.49 to 1.78)  | 0.91<br>(0.82 to 1)       |

**Abbreviations:** SDI, sociodemographic index; ASDR, age-standardized death rate; EAPC, estimated annual percentage change; UI, uncertainty interval; CI, confidence interval.

**Supplementary Table S6.** The death cases and age-standardized death rates of CRC attributable to diet low in milk in 1990 and 2019, and their temporal trends from 1990 to 2019.

| Characteristics                | 1990                         |                              | 2019                         |                              | 1990-2019                 |
|--------------------------------|------------------------------|------------------------------|------------------------------|------------------------------|---------------------------|
|                                | Number of deaths<br>(95% UI) | ASDR per 100,000<br>(95% UI) | Number of deaths<br>(95% UI) | ASDR per 100,000<br>(95% UI) | EAPC of ASDR<br>(95% CI)  |
| <b>Global</b>                  | 72199<br>(44384 to 99966)    | 1.98<br>(1.2 to 2.74)        | 166456<br>(107221 to 226027) | 2.09<br>(1.34 to 2.84)       | 0.19<br>(0.16 to 0.23)    |
| <b>Socio-demographic index</b> |                              |                              |                              |                              |                           |
| High SDI                       | 26999<br>(14174 to 39995)    | 2.58<br>(1.36 to 3.81)       | 39255<br>(21762 to 57568)    | 1.95<br>(1.08 to 2.85)       | -1.14<br>(-1.2 to -1.09)  |
| High-middle SDI                | 19832<br>(11648 to 28461)    | 1.98<br>(1.16 to 2.84)       | 46115<br>(28371 to 63889)    | 2.29<br>(1.41 to 3.17)       | 0.55<br>(0.49 to 0.61)    |
| Middle SDI                     | 15910<br>(11069 to 20548)    | 1.68<br>(1.17 to 2.18)       | 52394<br>(34928 to 69155)    | 2.24<br>(1.49 to 2.96)       | 1.13<br>(1 to 1.25)       |
| Low-middle SDI                 | 6808<br>(4700 to 9069)       | 1.23<br>(0.85 to 1.65)       | 22080<br>(14880 to 29018)    | 1.72<br>(1.16 to 2.25)       | 1.13<br>(1.08 to 1.18)    |
| Low SDI                        | 2607<br>(1744 to 3557)       | 1.21<br>(0.81 to 1.65)       | 6514<br>(4308 to 8719)       | 1.39<br>(0.92 to 1.86)       | 0.46<br>(0.38 to 0.54)    |
| <b>Region</b>                  |                              |                              |                              |                              |                           |
| Andean Latin America           | 269<br>(177 to 367)          | 1.4<br>(0.92 to 1.91)        | 998<br>(629 to 1408)         | 1.83<br>(1.16 to 2.58)       | 1.13<br>(0.99 to 1.28)    |
| Australasia                    | 467<br>(167 to 780)          | 2.02<br>(0.74 to 3.38)       | 410<br>(142 to 806)          | 0.78<br>(0.26 to 1.53)       | -4.1<br>(-4.54 to -3.65)  |
| Caribbean                      | 580<br>(376 to 785)          | 2.32<br>(1.51 to 3.15)       | 1431<br>(910 to 1993)        | 2.77<br>(1.76 to 3.85)       | 0.63<br>(0.58 to 0.68)    |
| Central Asia                   | 481<br>(232 to 755)          | 1.03<br>(0.5 to 1.62)        | 691<br>(340 to 1098)         | 1.04<br>(0.51 to 1.63)       | -0.09<br>(-0.28 to 0.1)   |
| Central Europe                 | 3711<br>(1771 to 5620)       | 2.61<br>(1.25 to 3.94)       | 6315<br>(3246 to 9515)       | 2.88<br>(1.49 to 4.34)       | 0.3<br>(0.18 to 0.43)     |
| Central Latin America          | 924<br>(571 to 1281)         | 1.19<br>(0.73 to 1.64)       | 3463<br>(1972 to 5057)       | 1.5<br>(0.85 to 2.19)        | 0.78<br>(0.73 to 0.82)    |
| Central Sub-Saharan Africa     | 412<br>(299 to 546)          | 2.07<br>(1.5 to 2.75)        | 929<br>(632 to 1316)         | 1.98<br>(1.33 to 2.84)       | -0.27<br>(-0.52 to -0.02) |
| East Asia                      | 15903<br>(10806 to 20942)    | 1.98<br>(1.35 to 2.61)       | 52877<br>(35241 to 71142)    | 2.7<br>(1.8 to 3.61)         | 1.39<br>(1.15 to 1.62)    |

|                                 |                          |                        |                           |                        |                           |
|---------------------------------|--------------------------|------------------------|---------------------------|------------------------|---------------------------|
| Eastern Europe                  | 3464<br>(1195 to 6059)   | 1.28<br>(0.45 to 2.21) | 5912<br>(2386 to 9539)    | 1.71<br>(0.7 to 2.76)  | 0.92<br>(0.57 to 1.27)    |
| Eastern Sub-Saharan<br>Africa   | 894<br>(571 to 1253)     | 1.29<br>(0.83 to 1.79) | 2265<br>(1440 to 3135)    | 1.52<br>(0.97 to 2.09) | 0.58<br>(0.51 to 0.66)    |
| High-income Asia<br>Pacific     | 5862<br>(3680 to 8025)   | 3.06<br>(1.92 to 4.17) | 13124<br>(8062 to 18133)  | 2.61<br>(1.58 to 3.59) | -0.65<br>(-0.71 to -0.59) |
| High-income North<br>America    | 7358<br>(3207 to 11460)  | 2.05<br>(0.9 to 3.2)   | 8476<br>(3297 to 13802)   | 1.32<br>(0.51 to 2.16) | -1.72<br>(-1.91 to -1.53) |
| North Africa and Middle<br>East | 2006<br>(1240 to 2904)   | 1.27<br>(0.78 to 1.84) | 6185<br>(3790 to 8725)    | 1.55<br>(0.94 to 2.19) | 0.81<br>(0.67 to 0.94)    |
| Oceania                         | 39<br>(25 to 54)         | 1.47<br>(0.95 to 2.05) | 104<br>(66 to 145)        | 1.68<br>(1.09 to 2.3)  | 0.43<br>(0.36 to 0.5)     |
| South Asia                      | 5419<br>(3766 to 7190)   | 1.07<br>(0.74 to 1.42) | 19002<br>(12875 to 24981) | 1.47<br>(1 to 1.93)    | 0.94<br>(0.81 to 1.06)    |
| Southeast Asia                  | 5071<br>(3679 to 6466)   | 2.12<br>(1.54 to 2.7)  | 16263<br>(11214 to 21732) | 2.86<br>(1.97 to 3.82) | 0.91<br>(0.85 to 0.96)    |
| Southern Latin America          | 1317<br>(748 to 1881)    | 2.98<br>(1.68 to 4.26) | 2705<br>(1542 to 3833)    | 3.2<br>(1.83 to 4.54)  | 0.26<br>(0.14 to 0.37)    |
| Southern Sub-Saharan<br>Africa  | 452<br>(283 to 641)      | 1.8<br>(1.12 to 2.57)  | 1017<br>(637 to 1423)     | 1.98<br>(1.23 to 2.76) | 0.32<br>(0.11 to 0.53)    |
| Tropical Latin America          | 1279<br>(705 to 1845)    | 1.53<br>(0.84 to 2.22) | 3659<br>(1822 to 5417)    | 1.54<br>(0.77 to 2.28) | -0.01<br>(-0.16 to 0.14)  |
| Western Europe                  | 15268<br>(7361 to 23213) | 2.6<br>(1.25 to 3.95)  | 17956<br>(8091 to 28063)  | 1.8<br>(0.81 to 2.84)  | -1.57<br>(-1.71 to -1.44) |
| Western Sub-Saharan<br>Africa   | 1025<br>(681 to 1431)    | 1.31<br>(0.88 to 1.83) | 2677<br>(1794 to 3619)    | 1.65<br>(1.1 to 2.21)  | 1.02<br>(0.91 to 1.13)    |

**Abbreviations:** SDI, sociodemographic index; ASDR, age-standardized death rate; EAPC, estimated annual percentage change; UI, uncertainty interval; CI, confidence interval.



**Supplementary Table S7.** The death cases and age-standardized death rates of CRC attributable to diet low in fiber in 1990 and 2019, and their temporal trends from 1990 to 2019.

| Characteristics                | 1990                         |                              | 2019                         |                              | 1990-2019                 |
|--------------------------------|------------------------------|------------------------------|------------------------------|------------------------------|---------------------------|
|                                | Number of deaths<br>(95% UI) | ASDR per 100,000<br>(95% UI) | Number of deaths<br>(95% UI) | ASDR per 100,000<br>(95% UI) | EAPC of ASDR<br>(95% CI)  |
| <b>Global</b>                  | 12548<br>(4964 to 23334)     | 0.36<br>(0.14 to 0.66)       | 20499<br>(8205 to 39829)     | 0.26<br>(0.11 to 0.51)       | -1.13<br>(-1.23 to -1.02) |
| <b>Socio-demographic index</b> |                              |                              |                              |                              |                           |
| High SDI                       | 5663<br>(2154 to 10850)      | 0.54<br>(0.21 to 1.03)       | 7284<br>(2772 to 14364)      | 0.35<br>(0.13 to 0.7)        | -1.5<br>(-1.54 to -1.47)  |
| High-middle SDI                | 2725<br>(988 to 5696)        | 0.28<br>(0.1 to 0.57)        | 4442<br>(1740 to 9415)       | 0.22<br>(0.09 to 0.47)       | -0.92<br>(-1.16 to -0.69) |
| Middle SDI                     | 2668<br>(1153 to 4500)       | 0.28<br>(0.12 to 0.47)       | 5433<br>(2336 to 9959)       | 0.23<br>(0.1 to 0.43)        | -0.61<br>(-0.75 to -0.46) |
| Low-middle SDI                 | 1250<br>(567 to 2076)        | 0.23<br>(0.11 to 0.38)       | 2771<br>(1210 to 5054)       | 0.22<br>(0.1 to 0.4)         | -0.28<br>(-0.42 to -0.15) |
| Low SDI                        | 234<br>(92 to 476)           | 0.11<br>(0.05 to 0.23)       | 556<br>(219 to 1071)         | 0.12<br>(0.05 to 0.23)       | 0.12<br>(-0.03 to 0.27)   |
| <b>Region</b>                  |                              |                              |                              |                              |                           |
| Andean Latin America           | 47<br>(17 to 92)             | 0.25<br>(0.09 to 0.48)       | 128<br>(49 to 242)           | 0.24<br>(0.09 to 0.45)       | -0.01<br>(-0.13 to 0.11)  |
| Australasia                    | 157<br>(55 to 307)           | 0.68<br>(0.24 to 1.32)       | 187<br>(69 to 365)           | 0.36<br>(0.13 to 0.71)       | -2.59<br>(-2.76 to -2.41) |
| Caribbean                      | 86<br>(31 to 170)            | 0.34<br>(0.12 to 0.68)       | 110<br>(43 to 223)           | 0.21<br>(0.08 to 0.43)       | -1.81<br>(-2.09 to -1.53) |
| Central Asia                   | 119<br>(42 to 244)           | 0.26<br>(0.09 to 0.53)       | 115<br>(41 to 256)           | 0.18<br>(0.06 to 0.4)        | -1.81<br>(-2.22 to -1.39) |
| Central Europe                 | 495<br>(178 to 1102)         | 0.35<br>(0.13 to 0.78)       | 764<br>(280 to 1622)         | 0.35<br>(0.13 to 0.74)       | -0.1<br>(-0.39 to 0.2)    |
| Central Latin America          | 95<br>(38 to 180)            | 0.12<br>(0.05 to 0.23)       | 319<br>(122 to 654)          | 0.14<br>(0.05 to 0.29)       | 0.47<br>(0.38 to 0.57)    |

|                                 |                        |                        |                        |                        |                           |
|---------------------------------|------------------------|------------------------|------------------------|------------------------|---------------------------|
| Central Sub-Saharan<br>Africa   | 17<br>(6 to 39)        | 0.09<br>(0.03 to 0.21) | 56<br>(19 to 121)      | 0.12<br>(0.04 to 0.27) | 0.98<br>(0.78 to 1.18)    |
| East Asia                       | 2025<br>(798 to 3825)  | 0.25<br>(0.1 to 0.47)  | 2898<br>(1197 to 6261) | 0.15<br>(0.06 to 0.33) | -1.32<br>(-1.63 to -1.01) |
| Eastern Europe                  | 623<br>(235 to 1419)   | 0.23<br>(0.09 to 0.52) | 892<br>(334 to 1988)   | 0.26<br>(0.1 to 0.57)  | -0.7<br>(-1.31 to -0.08)  |
| Eastern Sub-Saharan<br>Africa   | 42<br>(18 to 93)       | 0.06<br>(0.03 to 0.14) | 84<br>(41 to 164)      | 0.06<br>(0.03 to 0.11) | -0.58<br>(-0.65 to -0.52) |
| High-income Asia Pacific        | 638<br>(241 to 1310)   | 0.34<br>(0.13 to 0.69) | 1912<br>(771 to 3631)  | 0.38<br>(0.15 to 0.71) | 0.5<br>(0.34 to 0.65)     |
| High-income North<br>America    | 2161<br>(833 to 3970)  | 0.6<br>(0.23 to 1.09)  | 1910<br>(732 to 3778)  | 0.29<br>(0.11 to 0.58) | -2.51<br>(-2.67 to -2.34) |
| North Africa and Middle<br>East | 110<br>(48 to 242)     | 0.07<br>(0.03 to 0.16) | 309<br>(139 to 614)    | 0.08<br>(0.04 to 0.16) | 0.24<br>(0.17 to 0.31)    |
| Oceania                         | 1<br>(1 to 2)          | 0.04<br>(0.02 to 0.08) | 2<br>(1 to 3)          | 0.03<br>(0.02 to 0.05) | -0.89<br>(-1.15 to -0.62) |
| South Asia                      | 902<br>(379 to 1593)   | 0.19<br>(0.08 to 0.33) | 2157<br>(872 to 4124)  | 0.17<br>(0.07 to 0.33) | -0.49<br>(-0.71 to -0.27) |
| Southeast Asia                  | 1557<br>(791 to 2286)  | 0.66<br>(0.34 to 0.96) | 3920<br>(1783 to 6398) | 0.7<br>(0.32 to 1.14)  | 0.09<br>(0.02 to 0.16)    |
| Southern Latin America          | 288<br>(101 to 537)    | 0.66<br>(0.24 to 1.22) | 494<br>(174 to 955)    | 0.58<br>(0.21 to 1.13) | -0.17<br>(-0.3 to -0.03)  |
| Southern Sub-Saharan<br>Africa  | 21<br>(9 to 47)        | 0.09<br>(0.03 to 0.19) | 53<br>(22 to 118)      | 0.11<br>(0.04 to 0.23) | 0.63<br>(0.42 to 0.84)    |
| Tropical Latin America          | 223<br>(87 to 422)     | 0.27<br>(0.11 to 0.51) | 500<br>(198 to 1020)   | 0.21<br>(0.08 to 0.43) | -1.22<br>(-1.36 to -1.09) |
| Western Europe                  | 2892<br>(1074 to 5896) | 0.49<br>(0.18 to 0.99) | 3624<br>(1343 to 7418) | 0.35<br>(0.13 to 0.73) | -1.28<br>(-1.4 to -1.17)  |
| Western Sub-Saharan<br>Africa   | 49<br>(22 to 106)      | 0.07<br>(0.03 to 0.14) | 64<br>(38 to 114)      | 0.04<br>(0.02 to 0.07) | -1.75<br>(-2.03 to -1.47) |

**Abbreviations:** SDI, sociodemographic index; ASDR, age-standardized death rate; EAPC, estimated annual percentage change; UI, uncertainty interval; CI, confidence interval.

**Supplementary Table S8.** The death cases and age-standardized death rates of CRC attributable to diet low in calcium in 1990 and 2019, and their temporal trends from 1990 to 2019.

| Characteristics                | 1990                         |                              | 2019                         |                              | 1990-2019                 |
|--------------------------------|------------------------------|------------------------------|------------------------------|------------------------------|---------------------------|
|                                | Number of deaths<br>(95% UI) | ASDR per 100,000<br>(95% UI) | Number of deaths<br>(95% UI) | ASDR per 100,000<br>(95% UI) | EAPC of ASDR<br>(95% CI)  |
| <b>Global</b>                  | 63709<br>(46057 to 87779)    | 1.73<br>(1.24 to 2.41)       | 137896<br>(96835 to 189221)  | 1.73<br>(1.21 to 2.38)       | 0.04<br>(-0.06 to 0.13)   |
| <b>Socio-demographic index</b> |                              |                              |                              |                              |                           |
| High SDI                       | 16353<br>(9362 to 26404)     | 1.56<br>(0.89 to 2.51)       | 24723<br>(14298 to 38861)    | 1.2<br>(0.69 to 1.88)        | -0.85<br>(-0.89 to -0.82) |
| High-middle SDI                | 18120<br>(11963 to 26825)    | 1.8<br>(1.19 to 2.66)        | 33330<br>(20306 to 50206)    | 1.66<br>(1.01 to 2.5)        | -0.37<br>(-0.54 to -0.21) |
| Middle SDI                     | 18240<br>(14735 to 22771)    | 1.95<br>(1.57 to 2.42)       | 50250<br>(37787 to 65537)    | 2.16<br>(1.62 to 2.81)       | 0.51<br>(0.35 to 0.66)    |
| Low-middle SDI                 | 7730<br>(6177 to 9752)       | 1.44<br>(1.15 to 1.79)       | 21803<br>(16914 to 27979)    | 1.73<br>(1.35 to 2.21)       | 0.65<br>(0.58 to 0.71)    |
| Low SDI                        | 3228<br>(2501 to 4133)       | 1.52<br>(1.18 to 1.94)       | 7704<br>(6158 to 9579)       | 1.66<br>(1.34 to 2.06)       | 0.3<br>(0.25 to 0.34)     |
| <b>Region</b>                  |                              |                              |                              |                              |                           |
| Andean Latin America           | 315<br>(242 to 400)          | 1.65<br>(1.27 to 2.1)        | 975<br>(684 to 1335)         | 1.79<br>(1.26 to 2.45)       | 0.37<br>(0.23 to 0.52)    |
| Australasia                    | 392<br>(199 to 685)          | 1.7<br>(0.86 to 2.96)        | 634<br>(344 to 1054)         | 1.21<br>(0.66 to 2.01)       | -1.47<br>(-1.62 to -1.32) |
| Caribbean                      | 515<br>(373 to 695)          | 2.07<br>(1.5 to 2.78)        | 1119<br>(761 to 1576)        | 2.17<br>(1.48 to 3.05)       | -0.03<br>(-0.11 to 0.06)  |
| Central Asia                   | 527<br>(326 to 811)          | 1.14<br>(0.7 to 1.75)        | 592<br>(344 to 936)          | 0.91<br>(0.53 to 1.42)       | -1.02<br>(-1.23 to -0.82) |
| Central Europe                 | 2436<br>(1321 to 4075)       | 1.72<br>(0.93 to 2.87)       | 3566<br>(1853 to 6002)       | 1.61<br>(0.84 to 2.72)       | -0.32<br>(-0.57 to -0.07) |
| Central Latin America          | 1007<br>(756 to 1303)        | 1.31<br>(0.98 to 1.69)       | 3369<br>(2286 to 4734)       | 1.47<br>(0.99 to 2.06)       | 0.33<br>(0.27 to 0.39)    |
| Central Sub-Saharan Africa     | 386<br>(286 to 515)          | 1.96<br>(1.45 to 2.61)       | 907<br>(647 to 1244)         | 1.94<br>(1.37 to 2.72)       | -0.16<br>(-0.37 to 0.06)  |
| East Asia                      | 17222<br>(13608 to 22106)    | 2.16<br>(1.71 to 2.77)       | 42151<br>(28995 to 58467)    | 2.16<br>(1.49 to 2.97)       | 0.38<br>(0.08 to 0.68)    |
| Eastern Europe                 | 4279<br>(2343 to 7049)       | 1.56<br>(0.86 to 2.55)       | 4611<br>(2416 to 7893)       | 1.32<br>(0.69 to 2.27)       | -1.51<br>(-1.94 to -1.07) |
| Eastern Sub-Saharan Africa     | 1208<br>(930 to 1565)        | 1.76<br>(1.35 to 2.25)       | 2878<br>(2244 to 3643)       | 1.95<br>(1.54 to 2.45)       | 0.35<br>(0.29 to 0.4)     |
| High-income Asia Pacific       | 4703<br>(3110 to 6629)       | 2.47<br>(1.63 to 3.47)       | 10449<br>(6635 to 15092)     | 2.03<br>(1.27 to 2.95)       | -0.56<br>(-0.65 to -0.47) |
| High-income North America      | 4462<br>(2309 to 7663)       | 1.23<br>(0.63 to 2.1)        | 5202<br>(2578 to 9028)       | 0.79<br>(0.39 to 1.37)       | -1.27<br>(-1.55 to -0.99) |

|                              |                         |                        |                           |                        |                           |
|------------------------------|-------------------------|------------------------|---------------------------|------------------------|---------------------------|
| North Africa and Middle East | 2010<br>(1445 to 2757)  | 1.28<br>(0.92 to 1.76) | 5231<br>(3621 to 7273)    | 1.32<br>(0.91 to 1.84) | 0.18<br>(0.06 to 0.3)     |
| Oceania                      | 47<br>(34 to 62)        | 1.81<br>(1.33 to 2.37) | 127<br>(94 to 170)        | 2.05<br>(1.56 to 2.7)  | 0.42<br>(0.38 to 0.47)    |
| South Asia                   | 5469<br>(4328 to 6909)  | 1.13<br>(0.89 to 1.43) | 16734<br>(12701 to 21942) | 1.34<br>(1.02 to 1.74) | 0.5<br>(0.39 to 0.62)     |
| Southeast Asia               | 6431<br>(5000 to 7928)  | 2.7<br>(2.09 to 3.31)  | 20593<br>(15534 to 26291) | 3.63<br>(2.74 to 4.61) | 0.94<br>(0.88 to 1.01)    |
| Southern Latin America       | 1096<br>(705 to 1593)   | 2.5<br>(1.61 to 3.62)  | 1963<br>(1194 to 3008)    | 2.31<br>(1.41 to 3.55) | -0.08<br>(-0.18 to 0.03)  |
| Southern Sub-Saharan Africa  | 615<br>(475 to 778)     | 2.45<br>(1.88 to 3.13) | 1390<br>(1118 to 1705)    | 2.72<br>(2.18 to 3.34) | 0.31<br>(0.09 to 0.54)    |
| Tropical Latin America       | 1332<br>(962 to 1785)   | 1.62<br>(1.17 to 2.17) | 2893<br>(1714 to 4445)    | 1.23<br>(0.73 to 1.89) | -1.22<br>(-1.34 to -1.09) |
| Western Europe               | 7941<br>(3973 to 13940) | 1.33<br>(0.66 to 2.33) | 9416<br>(4700 to 16258)   | 0.91<br>(0.45 to 1.58) | -1.45<br>(-1.55 to -1.35) |
| Western Sub-Saharan Africa   | 1315<br>(1005 to 1725)  | 1.7<br>(1.3 to 2.22)   | 3098<br>(2366 to 3964)    | 1.93<br>(1.48 to 2.45) | 0.57<br>(0.49 to 0.65)    |

**Abbreviations:** SDI, sociodemographic index; ASDR, age-standardized death rate; EAPC, estimated annual percentage change; UI, uncertainty interval; CI, confidence interval.

**Supplementary Table S9.** The death cases and age-standardized death rates of CRC attributable to diet high in red meat in 1990 and 2019, and their temporal trends from 1990 to 2019.

| Characteristics                | 1990                         |                              | 2019                         |                              | 1990-2019                 |
|--------------------------------|------------------------------|------------------------------|------------------------------|------------------------------|---------------------------|
|                                | Number of deaths<br>(95% UI) | ASDR per 100,000<br>(95% UI) | Number of deaths<br>(95% UI) | ASDR per 100,000<br>(95% UI) | EAPC of ASDR<br>(95% CI)  |
| <b>Global</b>                  | 26087<br>(6690 to 50231)     | 0.71<br>(0.18 to 1.38)       | 52811<br>(13598 to 100688)   | 0.66<br>(0.17 to 1.26)       | -0.32<br>(-0.37 to -0.28) |
| <b>Socio-demographic index</b> |                              |                              |                              |                              |                           |
| High SDI                       | 14063<br>(3944 to 25419)     | 1.34<br>(0.38 to 2.42)       | 18849<br>(4893 to 35349)     | 0.97<br>(0.26 to 1.79)       | -1.29<br>(-1.37 to -1.21) |
| High-middle SDI                | 8864<br>(2276 to 17225)      | 0.87<br>(0.22 to 1.7)        | 18793<br>(5033 to 35132)     | 0.93<br>(0.25 to 1.74)       | 0.09<br>(0.01 to 0.17)    |
| Middle SDI                     | 2278<br>(297 to 5662)        | 0.23<br>(0.03 to 0.59)       | 11723<br>(2560 to 23587)     | 0.49<br>(0.1 to 0.99)        | 2.95<br>(2.77 to 3.12)    |
| Low-middle SDI                 | 649<br>(122 to 1497)         | 0.12<br>(0.02 to 0.27)       | 2826<br>(617 to 5904)        | 0.22<br>(0.05 to 0.45)       | 2.38<br>(2.28 to 2.48)    |
| Low SDI                        | 221<br>(32 to 565)           | 0.1<br>(0.01 to 0.26)        | 598<br>(98 to 1464)          | 0.12<br>(0.02 to 0.3)        | 0.81<br>(0.72 to 0.9)     |
| <b>Region</b>                  |                              |                              |                              |                              |                           |
| Andean Latin America           | 36<br>(4 to 92)              | 0.18<br>(0.02 to 0.47)       | 154<br>(17 to 392)           | 0.28<br>(0.03 to 0.71)       | 1.81<br>(1.68 to 1.95)    |
| Australasia                    | 630<br>(276 to 959)          | 2.72<br>(1.19 to 4.15)       | 888<br>(367 to 1387)         | 1.75<br>(0.74 to 2.71)       | -1.8<br>(-1.97 to -1.63)  |
| Caribbean                      | 83<br>(8 to 220)             | 0.33<br>(0.03 to 0.87)       | 209<br>(20 to 560)           | 0.4<br>(0.04 to 1.08)        | 0.9<br>(0.79 to 1.01)     |
| Central Asia                   | 271<br>(70 to 524)           | 0.57<br>(0.14 to 1.11)       | 389<br>(98 to 756)           | 0.56<br>(0.14 to 1.11)       | 0.39<br>(-0.13 to 0.91)   |
| Central Europe                 | 1538<br>(322 to 3190)        | 1.06<br>(0.22 to 2.23)       | 2862<br>(699 to 5678)        | 1.33<br>(0.33 to 2.61)       | 1.04<br>(0.92 to 1.17)    |
| Central Latin America          | 189<br>(24 to 461)           | 0.24<br>(0.03 to 0.58)       | 807<br>(130 to 1946)         | 0.34<br>(0.05 to 0.84)       | 1.38<br>(1.33 to 1.42)    |
| Central Sub-Saharan Africa     | 27<br>(5 to 67)              | 0.13<br>(0.02 to 0.32)       | 61<br>(10 to 150)            | 0.12<br>(0.02 to 0.3)        | -0.18<br>(-0.51 to 0.15)  |
| East Asia                      | 2851<br>(408 to 6970)        | 0.34<br>(0.05 to 0.84)       | 16498<br>(4056 to 31569)     | 0.82<br>(0.2 to 1.58)        | 3.6<br>(3.35 to 3.86)     |
| Eastern Europe                 | 2995<br>(772 to 5768)        | 1.07<br>(0.28 to 2.07)       | 2708<br>(468 to 5947)        | 0.79<br>(0.14 to 1.72)       | -1.91<br>(-2.21 to -1.62) |
| Eastern Sub-Saharan Africa     | 88<br>(10 to 231)            | 0.12<br>(0.01 to 0.32)       | 241<br>(27 to 626)           | 0.16<br>(0.02 to 0.4)        | 0.9<br>(0.79 to 1.02)     |
| High-income Asia Pacific       | 910<br>(87 to 2421)          | 0.47<br>(0.05 to 1.25)       | 2196<br>(275 to 5546)        | 0.47<br>(0.06 to 1.14)       | -0.25<br>(-0.35 to -0.15) |
| High-income North America      | 4798<br>(1332 to 8719)       | 1.36<br>(0.38 to 2.44)       | 6386<br>(1712 to 11567)      | 1.02<br>(0.28 to 1.82)       | -1.21<br>(-1.33 to -1.09) |

|                              |                         |                        |                          |                        |                           |
|------------------------------|-------------------------|------------------------|--------------------------|------------------------|---------------------------|
| North Africa and Middle East | 301<br>(29 to 820)      | 0.18<br>(0.02 to 0.5)  | 882<br>(86 to 2352)      | 0.22<br>(0.02 to 0.57) | 0.76<br>(0.51 to 1.02)    |
| Oceania                      | 6<br>(1 to 16)          | 0.22<br>(0.03 to 0.59) | 15<br>(2 to 41)          | 0.24<br>(0.03 to 0.64) | 0.11<br>(-0.02 to 0.24)   |
| South Asia                   | 267<br>(70 to 583)      | 0.05<br>(0.01 to 0.12) | 947<br>(228 to 2161)     | 0.07<br>(0.02 to 0.16) | 0.84<br>(0.71 to 0.97)    |
| Southeast Asia               | 406<br>(51 to 1036)     | 0.17<br>(0.02 to 0.42) | 1822<br>(220 to 4550)    | 0.31<br>(0.04 to 0.77) | 2.15<br>(2.08 to 2.21)    |
| Southern Latin America       | 896<br>(376 to 1387)    | 2<br>(0.82 to 3.09)    | 1768<br>(705 to 2777)    | 2.1<br>(0.84 to 3.3)   | 0.15<br>(0.06 to 0.23)    |
| Southern Sub-Saharan Africa  | 83<br>(11 to 211)       | 0.32<br>(0.04 to 0.84) | 209<br>(30 to 498)       | 0.4<br>(0.06 to 0.95)  | 1.01<br>(0.84 to 1.18)    |
| Tropical Latin America       | 388<br>(78 to 834)      | 0.45<br>(0.09 to 0.98) | 2403<br>(890 to 3925)    | 1<br>(0.36 to 1.64)    | 3.02<br>(2.41 to 3.64)    |
| Western Europe               | 9232<br>(2731 to 16476) | 1.59<br>(0.48 to 2.82) | 11104<br>(2953 to 20565) | 1.16<br>(0.32 to 2.11) | -1.33<br>(-1.44 to -1.22) |
| Western Sub-Saharan Africa   | 92<br>(10 to 244)       | 0.11<br>(0.01 to 0.3)  | 262<br>(29 to 684)       | 0.16<br>(0.02 to 0.41) | 1.35<br>(1.23 to 1.48)    |

**Abbreviations:** SDI, sociodemographic index; ASDR, age-standardized death rate; EAPC, estimated annual percentage change; UI, uncertainty interval; CI, confidence interval.

**Supplementary Table S10.** The death cases and age-standardized death rates of CRC attributable to diet high in processed meat in 1990 and 2019, and their temporal trends from 1990 to 2019.

| Characteristics                | 1990                         |                              | 2019                         |                              | 1990-2019                 |
|--------------------------------|------------------------------|------------------------------|------------------------------|------------------------------|---------------------------|
|                                | Number of deaths<br>(95% UI) | ASDR per 100,000<br>(95% UI) | Number of deaths<br>(95% UI) | ASDR per 100,000<br>(95% UI) | EAPC of ASDR<br>(95% CI)  |
| <b>Global</b>                  | 20185<br>(7515 to 30917)     | 0.56<br>(0.2 to 0.87)        | 33928<br>(11645 to 52096)    | 0.43<br>(0.15 to 0.66)       | -1.08<br>(-1.2 to -0.96)  |
| <b>Socio-demographic index</b> |                              |                              |                              |                              |                           |
| High-middle SDI                | 6473<br>(2283 to 10459)      | 0.63<br>(0.22 to 1.02)       | 10456<br>(2857 to 16319)     | 0.52<br>(0.14 to 0.81)       | -0.88<br>(-1.01 to -0.74) |
| High SDI                       | 12344<br>(4087 to 18743)     | 1.18<br>(0.39 to 1.79)       | 17957<br>(6063 to 27711)     | 0.91<br>(0.32 to 1.41)       | -1.04<br>(-1.19 to -0.89) |
| Low-middle SDI                 | 426<br>(172 to 661)          | 0.08<br>(0.03 to 0.12)       | 1620<br>(654 to 2475)        | 0.12<br>(0.05 to 0.19)       | 1.79<br>(1.71 to 1.86)    |
| Low SDI                        | 208<br>(47 to 364)           | 0.09<br>(0.02 to 0.16)       | 587<br>(139 to 987)          | 0.12<br>(0.03 to 0.2)        | 0.89<br>(0.84 to 0.94)    |
| Middle SDI                     | 725<br>(307 to 1102)         | 0.08<br>(0.03 to 0.11)       | 3293<br>(1028 to 5402)       | 0.14<br>(0.04 to 0.22)       | 2.47<br>(2.32 to 2.62)    |
| <b>Region</b>                  |                              |                              |                              |                              |                           |
| Andean Latin America           | 10<br>(5 to 15)              | 0.05<br>(0.03 to 0.07)       | 44<br>(17 to 75)             | 0.08<br>(0.03 to 0.13)       | 2.03<br>(1.88 to 2.18)    |
| Australasia                    | 279<br>(69 to 435)           | 1.21<br>(0.31 to 1.89)       | 450<br>(120 to 693)          | 0.89<br>(0.24 to 1.36)       | -1.27<br>(-1.4 to -1.14)  |
| Caribbean                      | 39<br>(7 to 67)              | 0.15<br>(0.03 to 0.26)       | 100<br>(18 to 181)           | 0.19<br>(0.04 to 0.35)       | 1.02<br>(0.95 to 1.09)    |
| Central Asia                   | 190<br>(33 to 306)           | 0.4<br>(0.07 to 0.65)        | 280<br>(50 to 457)           | 0.4<br>(0.07 to 0.66)        | 0.31<br>(0.03 to 0.6)     |
| Central Europe                 | 1002<br>(178 to 1615)        | 0.7<br>(0.12 to 1.13)        | 2007<br>(436 to 3289)        | 0.93<br>(0.21 to 1.52)       | 1.35<br>(1.18 to 1.51)    |
| Central Latin America          | 78<br>(15 to 131)            | 0.1<br>(0.02 to 0.16)        | 342<br>(65 to 603)           | 0.15<br>(0.03 to 0.26)       | 1.55<br>(1.49 to 1.6)     |
| Central Sub-Saharan Africa     | 24<br>(3 to 47)              | 0.11<br>(0.02 to 0.22)       | 54<br>(8 to 105)             | 0.11<br>(0.02 to 0.21)       | -0.22<br>(-0.54 to 0.11)  |
| East Asia                      | 622<br>(277 to 987)          | 0.08<br>(0.03 to 0.12)       | 3378<br>(701 to 6071)        | 0.17<br>(0.04 to 0.3)        | 3.41<br>(3.13 to 3.69)    |

|                              |                         |                        |                          |                        |                           |
|------------------------------|-------------------------|------------------------|--------------------------|------------------------|---------------------------|
| Eastern Europe               | 3313<br>(1175 to 5893)  | 1.19<br>(0.42 to 2.11) | 3347<br>(1058 to 5208)   | 0.96<br>(0.3 to 1.5)   | -1.2<br>(-1.49 to -0.91)  |
| Eastern Sub-Saharan Africa   | 73<br>(11 to 134)       | 0.1<br>(0.02 to 0.18)  | 200<br>(30 to 370)       | 0.13<br>(0.02 to 0.23) | 0.95<br>(0.85 to 1.06)    |
| High-income Asia Pacific     | 1480<br>(384 to 2310)   | 0.74<br>(0.19 to 1.16) | 3003<br>(761 to 4758)    | 0.66<br>(0.18 to 1.02) | -0.5<br>(-0.75 to -0.24)  |
| High-income North America    | 4261<br>(1414 to 6494)  | 1.19<br>(0.4 to 1.82)  | 6316<br>(2234 to 10039)  | 1<br>(0.36 to 1.6)     | -0.82<br>(-0.91 to -0.73) |
| North Africa and Middle East | 116<br>(32 to 208)      | 0.07<br>(0.02 to 0.13) | 411<br>(95 to 725)       | 0.1<br>(0.02 to 0.17)  | 1.45<br>(1.21 to 1.7)     |
| Oceania                      | 2<br>(1 to 3)           | 0.06<br>(0.02 to 0.1)  | 5<br>(1 to 8)            | 0.07<br>(0.02 to 0.13) | 0.58<br>(0.49 to 0.66)    |
| South Asia                   | 339<br>(177 to 507)     | 0.07<br>(0.03 to 0.1)  | 1421<br>(852 to 2054)    | 0.11<br>(0.06 to 0.15) | 1.6<br>(1.52 to 1.69)     |
| Southeast Asia               | 137<br>(73 to 195)      | 0.06<br>(0.03 to 0.08) | 592<br>(264 to 926)      | 0.1<br>(0.05 to 0.16)  | 2.06<br>(1.95 to 2.18)    |
| Southern Latin America       | 280<br>(47 to 456)      | 0.63<br>(0.1 to 1.02)  | 725<br>(163 to 1152)     | 0.86<br>(0.19 to 1.37) | 1.16<br>(1.09 to 1.23)    |
| Southern Sub-Saharan Africa  | 32<br>(6 to 60)         | 0.12<br>(0.02 to 0.23) | 85<br>(14 to 152)        | 0.16<br>(0.03 to 0.28) | 1.08<br>(0.91 to 1.26)    |
| Tropical Latin America       | 111<br>(20 to 194)      | 0.13<br>(0.02 to 0.22) | 501<br>(68 to 872)       | 0.21<br>(0.03 to 0.36) | 2.04<br>(1.92 to 2.16)    |
| Western Europe               | 7676<br>(2454 to 11669) | 1.31<br>(0.42 to 2)    | 10299<br>(3467 to 15699) | 1.05<br>(0.36 to 1.61) | -0.94<br>(-1.14 to -0.75) |
| Western Sub-Saharan Africa   | 120<br>(16 to 222)      | 0.15<br>(0.02 to 0.27) | 368<br>(55 to 644)       | 0.21<br>(0.03 to 0.37) | 1.57<br>(1.46 to 1.68)    |

**Abbreviations:** SDI, sociodemographic index; ASDR, age-standardized death rate; EAPC, estimated annual percentage change; UI, uncertainty interval; CI, confidence interval.
